# Supplementary material for: Integrated Transcriptome Analysis Identified Key Expansin Genes Associated with Wheat Cell Wall, GrainWeight and Yield
Source: Preprints.org preprint supplement (doi:10.20944/preprints202307.0816.v1), 2023-07-12
Supplement: Supplementary file 1 [file supplementary]

## Sheet: Genes
Genes	Modules	description	interpro_description	Arabidopsis orthologs (PLAZA4.5)
TraesCS1A02G015400	M1		Small GTPase	AT1G28550, AT3G15060, AT1G06400, AT1G16920, AT2G33870, AT3G07410, AT3G46830, AT1G73640, AT1G05810, AT4G18800, AT1G07410, AT2G43130, AT5G46025, AT5G59150, AT5G60860, AT5G47520, AT1G18200, AT2G31680, AT4G18430, AT5G45750, AT1G09630
TraesCS1A02G021100	M1		Transferase	AT3G29590, AT3G29680, AT5G39090, AT5G39050, AT1G03495, AT3G29690, AT3G29720, AT3G29670, AT5G61160, AT3G29636, AT3G29635, AT1G03940, AT5G39080
TraesCS1A02G021200	M1	Mechanosensitive ion channel protein [Source:UniProtKB/TrEMBL;Acc:A0A341NQL9]	Mechanosensitive ion channel MscS	AT5G19520, AT1G53470, AT2G17010, AT5G12080, AT1G78610, AT2G17000, AT3G14810
TraesCS1A02G029800	M1		Zinc finger, RING-type	AT3G46620, AT2G39720, AT5G59550
TraesCS1A02G030000	M1		Heat shock protein DnaJ, cysteine-rich domain superfamily	AT5G02160
TraesCS1A02G034300	M1	E3 ubiquitin ligase, XA21-mediated disease resistanc [Source: Projected from Oryza sativa (Os05g0112000)]	Zinc finger, RING-type	AT2G28840
TraesCS1A02G035800	M1			AT3G46430, AT5G59613
TraesCS1A02G038100	M1	Histone H2A [Source:UniProtKB/TrEMBL;Acc:W4ZWK0]	Histone H2A	AT1G54690, AT4G27230, AT3G20670, AT1G51060, AT5G27670, AT5G59870, AT5G54640, AT1G08880, AT5G02560
TraesCS1A02G038200	M1	Histone H2A [Source:UniProtKB/TrEMBL;Acc:W4ZYU1]	Histone H2A	AT1G54690, AT4G27230, AT3G20670, AT1G51060, AT5G27670, AT5G59870, AT5G54640, AT1G08880, AT5G02560
TraesCS1A02G042900	M1		SET domain	AT4G13460, AT2G33290
TraesCS1A02G043500	M1		ENT domain	AT5G20030, AT2G25590, AT4G32440
TraesCS1A02G045800	M1		11-S seed storage protein, plant	AT2G28680, AT1G07750
TraesCS1A02G046900	M1		BKI1/Probable membrane-associated kinase regulator 1/3/4	AT2G37380, AT2G39370
TraesCS1A02G048700	M1		Plant lipid transfer protein/Par allergen	AT4G08670, AT3G43720, AT2G27130, AT5G64080, AT3G22580, AT2G13820, AT4G14815, AT1G36150, AT3G22600, AT2G48130, AT1G03103, AT5G09370
TraesCS1A02G049100	M1		BURP domain	AT1G49320, AT1G60390, AT5G25610, AT1G70370, AT1G23760
TraesCS1A02G049600	M1		ABC transporter-like	AT2G39350, AT2G37360, AT3G55110, AT3G53510, AT3G55090, AT3G55130, AT3G55100, AT5G13580
TraesCS1A02G050100	M1		Alcohol dehydrogenase, zinc-type, conserved site	AT5G43940, AT1G64710, AT1G77120, AT1G32780, AT5G24760
TraesCS1A02G050600	M1	Defensin [Source:UniProtKB/TrEMBL;Acc:W4ZVB1]	Knottin, scorpion toxin-like	AT5G63660, AT2G02100, AT2G02130, AT2G02140, AT2G02120, AT1G61070, AT2G31953, AT2G31957, AT2G02147
TraesCS1A02G050700	M1	Defensin [Source:UniProtKB/TrEMBL;Acc:W4ZVX9]	Knottin, scorpion toxin-like
TraesCS1A02G050800	M1		Knottin, scorpion toxin-like	AT5G63660, AT2G02100, AT2G02130, AT2G02140, AT2G02120, AT1G61070, AT2G31953, AT2G31957, AT2G02147
TraesCS1A02G050900	M1	Defensin [Source:UniProtKB/TrEMBL;Acc:A0A060AJ86]	Knottin, scorpion toxin-like	AT5G63660, AT2G02100, AT2G02130, AT2G02140, AT2G02120, AT1G61070, AT2G31953, AT2G31957, AT2G02147
TraesCS1A02G051700	M1
TraesCS1A02G051900	M1		Short transmembrane mitochondrial protein 1	AT4G25225, AT2G35736
TraesCS1A02G052300	M1		GDSL lipase/esterase	AT3G62280, AT1G54790, AT3G05180, AT4G01130, AT1G56670, AT3G26430, AT1G09390, AT1G67830, AT5G14450, AT3G27950
TraesCS1A02G054000	M1		SRR1-like domain	AT5G59560
TraesCS1A02G056200	M1
TraesCS1A02G057200	M1	Glutamyl-tRNA reductase [Source:UniProtKB/TrEMBL;Acc:A0A1D5S176]	Tetrapyrrole biosynthesis, glutamyl-tRNA reductase	AT1G58290, AT1G09940, AT2G31250
TraesCS1A02G058300	M1		Ribosomal protein L10P	AT3G12370, AT5G13510
TraesCS1A02G059100	M1	Patatin [Source:UniProtKB/TrEMBL;Acc:W4ZY32]	Patatin-like phospholipase domain	AT4G37060, AT4G37050, AT5G43590, AT2G26560, AT4G37070
TraesCS1A02G059600	M1		PWWP domain	AT3G54760, AT5G02950, AT3G09670
TraesCS1A02G061400	M1
TraesCS1A02G064000	M1	Glycosyltransferases [Source:UniProtKB/TrEMBL;Acc:A0A1D5S4V0]	Glycosyl transferase, family 43	AT2G37090
TraesCS1A02G065800	M1			AT5G03110, AT2G37100
TraesCS1A02G066200	M1		Protein kinase domain	AT3G45410, AT3G59740, AT3G59730, AT3G55550, AT2G43700, AT3G45330, AT5G60310, AT1G07460, AT3G45390, AT5G03140, AT5G03350, AT1G53060, AT3G53810, AT5G10530, AT5G60270, AT1G70130, AT5G01540, AT5G65600, AT3G59750, AT2G43690, AT2G29220, AT1G15530, AT3G15356, AT4G02410, AT1G53080, AT3G45440, AT5G59270, AT1G53070, AT5G01560, AT3G53380, AT2G37710, AT2G29250, AT4G02420, AT5G60280, AT1G70110, AT5G55830, AT5…
TraesCS1A02G067462	M1		Pentatricopeptide repeat
TraesCS1A02G068000	M1			AT3G51010
TraesCS1A02G070200	M1		Oxoglutarate/iron-dependent dioxygenase	AT3G11180, AT3G55970, AT5G05600, AT2G38240
TraesCS1A02G070600	M1		Protein kinase domain	AT5G47850, AT3G55950
TraesCS1A02G070700	M1		BTB/POZ domain	AT2G39760, AT5G19000, AT3G06190, AT3G03740, AT3G43700, AT5G21010
TraesCS1A02G072600	M1	BZIP transcription factor [Source:UniProtKB/TrEMBL;Acc:Q53UC7]	Basic-leucine zipper domain	AT5G15830, AT4G37730, AT4G34590, AT1G75390, AT5G49450, AT3G62420, AT2G18160, AT2G22850
TraesCS1A02G075000	M1		AMP-dependent synthetase/ligase	AT2G47240
TraesCS1A02G076700	M1		Cytochrome P450	AT2G45550, AT2G45570, AT2G45580, AT2G45560, AT3G61040
TraesCS1A02G077700	M1	Peroxidase [Source:UniProtKB/TrEMBL;Acc:W4ZWP5]	Plant peroxidase	AT4G33420
TraesCS1A02G078100	M1	Peroxidase [Source:UniProtKB/TrEMBL;Acc:W4ZYP4]	Plant peroxidase	AT4G08780, AT4G33420, AT3G21770, AT4G08770, AT5G64110, AT2G38390, AT1G49570, AT1G14550, AT5G66390, AT5G15180, AT5G39580, AT5G06730, AT2G38380, AT2G22420, AT4G36430, AT4G26010, AT1G05260, AT1G44970, AT5G06720, AT2G39040, AT4G16270, AT3G49120, AT5G64100, AT1G71695, AT1G05240, AT3G42570, AT2G43480, AT3G32980, AT1G14540, AT5G51890, AT4G11290, AT1G34510, AT3G03670, AT5G58390, AT5G17820, AT1G68850, AT5…
TraesCS1A02G079900	M1	Histone H4 [Source:UniProtKB/TrEMBL;Acc:A0A077RYQ1]	Histone H4	AT1G07660, AT5G59970, AT3G46320, AT3G53730, AT3G45930, AT1G07820, AT2G28740, AT5G59690
TraesCS1A02G081600	M1			AT1G31130, AT4G19950, AT5G44860
TraesCS1A02G083000	M1	Helix-loop-helix DNA-binding domain containing protein [Source: Projected from Oryza sativa (Os05g0139100)]	Myc-type, basic helix-loop-helix (bHLH) domain	AT4G28800, AT1G09530, AT5G67110, AT2G20180, AT4G36930, AT2G46970, AT4G28815, AT5G61270, AT3G59060, AT3G62090, AT2G43010, AT1G02340, AT4G28811, AT1G68240, AT4G00050
TraesCS1A02G084300	M1		Transcription termination factor, mitochondrial/chloroplastic	AT2G34620, AT2G36000, AT2G03050, AT3G18870
TraesCS1A02G092700	M1		Tetrahydrofolate dehydrogenase/cyclohydrolase	AT2G38660, AT3G12290, AT4G00620, AT4G00600
TraesCS1A02G094700	M1		Fungal lipase-like domain	AT1G45201, AT5G67050, AT3G14360, AT5G42930, AT1G56630
TraesCS1A02G095600	M1	WAT1-related protein [Source:UniProtKB/TrEMBL;Acc:W4ZWK7]	EamA domain	AT1G43650, AT5G64700
TraesCS1A02G097000	M1		NADH dehydrogenase-like complex, subunit S	AT4G23890
TraesCS1A02G098800	M1
TraesCS1A02G099100	M1		Cellulose synthase	AT5G16910, AT3G03050
TraesCS1A02G101900	M1		Ribosomal protein S27/S33, mitochondrial	AT5G44710
TraesCS1A02G103900	M1		Protein kinase domain	AT5G65710, AT1G75820, AT4G28490, AT3G49670, AT4G20270, AT5G48940, AT3G19700, AT3G24240, AT5G65700, AT1G28440, AT5G49660, AT1G08590, AT1G09970, AT4G28650, AT5G61480
TraesCS1A02G108000	M1		RNA recognition motif domain	AT3G53500, AT2G37340
TraesCS1A02G111000	M1	Transition metal ion transporter, Ion transpor [Source: Projected from Oryza sativa (Os05g0164800)]	Zinc/iron permease	AT1G05300, AT4G19690, AT3G12750, AT5G62160, AT4G19680, AT4G33020, AT1G60960, AT2G04032, AT1G10970, AT1G31260, AT2G32270, AT2G30080
TraesCS1A02G111800	M1			AT1G06930, AT3G56260, AT5G01790
TraesCS1A02G113600	M1		Alliinase, C-terminal	AT1G34040, AT4G24670, AT1G70560, AT1G23320, AT1G34060
TraesCS1A02G116600	M1			AT1G68680
TraesCS1A02G116900	M1			AT3G15630, AT1G52720
TraesCS1A02G117000	M1			AT3G15630, AT1G52720
TraesCS1A02G117400	M1			AT3G15630, AT1G52720
TraesCS1A02G117500	M1		Bicarbonate transporter, eukaryotic	AT1G74810, AT1G15460, AT4G32510, AT5G25430, AT2G47160, AT3G62270, AT3G06450
TraesCS1A02G117700	M1	Glycosyltransferase [Source:UniProtKB/TrEMBL;Acc:A0A1D5S3I3]	UDP-glucuronosyl/UDP-glucosyltransferase	AT4G34135, AT3G53150, AT2G36790, AT4G34131, AT2G36750, AT2G15480, AT2G36760, AT2G36800, AT2G15490, AT2G36780, AT4G34138, AT2G36770, AT3G53160
TraesCS1A02G119100	M1		Transferase	AT3G03480, AT5G17540, AT3G62160, AT5G57840
TraesCS1A02G119600	M1		Leucine-rich repeat	AT1G49490, AT3G24480, AT2G15880, AT4G18670, AT4G28380, AT1G62440, AT4G13340, AT3G19020, AT5G25550, AT1G12040, AT3G22800, AT4G33970
TraesCS1A02G119800	M1		Zf-FLZ domain	AT1G79970, AT2G25690, AT5G11460
TraesCS1A02G120000	M1			AT5G25570
TraesCS1A02G120500	M1	LEA-like protein 2 [Source:UniProtKB/TrEMBL;Acc:W4ZXM1]		AT1G71730
TraesCS1A02G122500	M1	Malic enzyme [Source:UniProtKB/TrEMBL;Acc:W4ZXP0]	Malic oxidoreductase	AT5G11670, AT1G79750, AT5G25880, AT2G19900
TraesCS1A02G123100	M1
TraesCS1A02G123200	M1		Leucine-rich repeat	AT2G19780, AT4G29240, AT4G28380
TraesCS1A02G123300	M1		Nucleic acid-binding, OB-fold
TraesCS1A02G124200	M1	Peroxidase [Source:UniProtKB/TrEMBL;Acc:W4ZY90]	Plant peroxidase	AT1G71695
TraesCS1A02G124600	M1		Mitochondrial substrate/solute carrier	AT5G19760
TraesCS1A02G127800	M1		Zinc finger, GRF-type
TraesCS1A02G132400	M1	Histone H2A [Source:UniProtKB/TrEMBL;Acc:A0A0C4BKM5]	Histone H2A	AT3G54560, AT1G52740, AT4G13570, AT2G38810
TraesCS1A02G133100	M1		Chaperone DnaK	AT5G02490, AT4G24280, AT5G42020, AT4G37910, AT1G56410, AT1G16030, AT3G12580, AT1G09080, AT5G02500, AT5G28540, AT5G49910, AT5G09590, AT3G09440
TraesCS1A02G134000	M1		EF-hand domain	AT5G37770, AT1G73630, AT2G36180, AT1G18210, AT3G03400, AT5G17470, AT1G24620, AT1G66400
TraesCS1A02G137500	M1		Mediator of RNA polymerase II transcription subunit 32	AT1G11760
TraesCS1A02G141900	M1		Zinc finger, RING-type	AT5G01520, AT3G47160, AT5G58787
TraesCS1A02G142900	M1		GDP-fucose protein O-fucosyltransferase	AT2G04280, AT4G12700, AT4G08810
TraesCS1A02G143700	M1		Shugoshin, C-terminal	AT3G44960, AT5G04320, AT3G10440
TraesCS1A02G143900	M1		Thiolase	AT5G48880, AT2G33150, AT1G04710
TraesCS1A02G145900	M1
TraesCS1A02G148400	M1	Ribosomal protein L17 [Source:UniProtKB/TrEMBL;Acc:Q5I7K4]	Ribosomal protein L14P	AT3G04400, AT2G33370, AT1G04480
TraesCS1A02G150100	M1		Leucine-rich repeat
TraesCS1A02G150200	M1		Proton-dependent oligopeptide transporter family	AT1G69870, AT1G69860, AT3G25280, AT3G25260, AT2G26690, AT2G02040, AT1G22550, AT2G37900, AT2G02020, AT5G19640, AT1G18880, AT3G47960, AT1G72120, AT1G27040, AT1G32450, AT3G21670, AT1G68570, AT5G46050, AT1G22540, AT5G46040, AT5G11570, AT5G14940, AT1G72130, AT5G62730, AT3G16180, AT1G72140, AT3G01350, AT3G53960, AT1G69850, AT1G52190, AT3G54450, AT1G62200, AT2G40460, AT5G01180, AT5G62680, AT1G22570, AT3…
TraesCS1A02G152100	M1	3-ketoacyl-CoA synthase [Source:UniProtKB/TrEMBL;Acc:A0A1D5RYU5]	Very-long-chain 3-ketoacyl-CoA synthase	AT2G28630, AT4G34510, AT3G10280, AT2G16280, AT2G15090, AT1G25450, AT2G26250, AT5G49070, AT5G04530, AT1G01120, AT5G43760, AT1G71160, AT2G46720, AT1G07720, AT2G26640, AT1G68530, AT3G52160, AT4G34250, AT1G19440, AT4G34520, AT1G04220
TraesCS1A02G153000	M1	Long-chain-alcohol oxidase [Source:UniProtKB/TrEMBL;Acc:A0A1D5RPU8]	Glucose-methanol-choline oxidoreductase, N-terminal	AT1G03990, AT4G28570, AT4G19380, AT3G23410
TraesCS1A02G157700	M1	Double-stranded RNA-binding protein 2 [Source:Projected from Arabidopsis thaliana (AT2G28380) UniProtKB/Swiss-Prot;Acc:Q9SKN2]		AT3G26932, AT5G41070, AT3G62800, AT2G28380
TraesCS1A02G158300	M1			AT2G28430
TraesCS1A02G166100	M1		Uncharacterised protein family, basic secretory protein	AT2G15170, AT2G15220, AT2G15130
TraesCS1A02G171000	M1	NADPH-protochlorophyllide oxidoreductase [Source:UniProtKB/TrEMBL;Acc:A0A341NLQ7]	Short-chain dehydrogenase/reductase SDR	AT4G27440, AT1G03630, AT5G54190
TraesCS1A02G171400	M1		Modifying wall lignin-1/2	AT1G52910, AT4G27435, AT1G61065, AT3G15480, AT1G68220, AT1G13380
TraesCS1A02G173000	M1
TraesCS1A02G174700	M1		Remorin, C-terminal	AT5G23750, AT3G48940, AT3G61260, AT2G45820
TraesCS1A02G174800	M1
TraesCS1A02G175100	M1
TraesCS1A02G175200	M1		Bifunctional inhibitor/plant lipid transfer protein/seed storage helical domain	AT1G07747, AT1G66850, AT5G38195, AT1G43665, AT5G38170, AT1G73780, AT2G14846, AT1G43667, AT4G12825, AT3G18280, AT5G38197, AT1G43666, AT3G57310, AT5G38180, AT5G38160, AT1G48750
TraesCS1A02G176000	M1		Multicopper oxidase, type 1	AT5G51480, AT5G48450, AT4G25240, AT4G12420
TraesCS1A02G176300	M1	YABBY family transcription factor, Leaf developmen [Source: Projected from Oryza sativa (Os10g0508300)]	YABBY protein	AT4G00180, AT2G45190
TraesCS1A02G176800	M1		Nucleotide-diphospho-sugar transferases	AT1G64980
TraesCS1A02G177000	M1		Protein kinase domain	AT1G33260, AT4G10390
TraesCS1A02G177100	M1		Cytochrome P450	AT3G10570, AT1G64930, AT1G64950, AT5G61320, AT5G04660, AT1G64940, AT1G11600, AT2G12190, AT3G10560, AT1G64900, AT3G03470, AT5G04630
TraesCS1A02G177500	M1		Major intrinsic protein	AT1G80760, AT4G10380
TraesCS1A02G178700	M1		Small auxin-up RNA	AT3G61900, AT2G46690, AT4G00880, AT5G53590
TraesCS1A02G179000	M1	Similar to actin [Source: Projected from Oryza sativa (Os10g0510000)]	Actin family	AT2G42100, AT2G37620, AT3G46520, AT2G42170, AT5G59370, AT5G09810, AT1G49240, AT2G42090, AT3G12110, AT3G53750, AT3G18780
TraesCS1A02G181100	M1		Protein of unknown function DUF538	AT5G46230, AT1G30020, AT1G09310, AT4G24130, AT1G56580
TraesCS1A02G182500	M1			AT1G17530, AT3G04800, AT1G72750
TraesCS1A02G186500	M1		Glutathione S-transferase, N-terminal	AT1G78360, AT1G59700, AT1G78380, AT1G78370, AT1G78320, AT1G10360, AT1G59670, AT1G17190, AT2G29440, AT1G17170, AT1G27130, AT3G43800, AT1G10370, AT2G29460, AT3G09270, AT2G29490, AT2G29420, AT2G29470, AT1G69920, AT5G62480, AT1G17180, AT2G29450, AT1G27140, AT1G53680, AT2G29480, AT1G69930, AT1G78340, AT1G74590
TraesCS1A02G186700	M1		Glutathione S-transferase, N-terminal	AT1G78360, AT1G59700, AT1G78380, AT1G78370, AT1G78320, AT1G10360, AT1G59670, AT1G17190, AT2G29440, AT1G17170, AT1G27130, AT3G43800, AT1G10370, AT2G29460, AT3G09270, AT2G29490, AT2G29420, AT2G29470, AT1G69920, AT5G62480, AT1G17180, AT2G29450, AT1G27140, AT1G53680, AT2G29480, AT1G69930, AT1G78340, AT1G74590
TraesCS1A02G187100	M1		Cytochrome P450	AT2G45510, AT2G45970, AT2G44890, AT2G27690, AT4G00360, AT4G39500, AT3G56630, AT2G21910, AT1G57750, AT1G13140, AT1G47620, AT3G48520, AT5G02900, AT2G23180, AT3G01900, AT1G34540, AT1G65340, AT5G52320, AT4G39480, AT4G32170, AT5G23190, AT3G26125, AT1G01600, AT1G66030, AT5G08250, AT4G39510, AT1G69500, AT5G63450, AT1G24540, AT1G13150, AT5G58860, AT1G63710, AT4G39490
TraesCS1A02G188400	M1
TraesCS1A02G188700	M1		Phloem protein 2-like	AT3G53000, AT3G61060, AT5G52120, AT1G12710, AT1G63090
TraesCS1A02G190100	M1		NAC domain	AT3G17730, AT4G36160, AT5G04395, AT3G29035, AT1G62700, AT5G24590, AT5G17260, AT5G64060, AT3G61910, AT1G52880, AT3G15510, AT1G32770, AT5G04410, AT4G10350, AT5G13180, AT2G46770, AT5G66300, AT3G04070, AT4G27410, AT1G12260, AT2G27300, AT5G07680, AT5G53950, AT3G10480, AT1G76420, AT2G33480, AT3G49530, AT3G10500, AT3G10490, AT1G79580, AT3G12977, AT1G01720, AT5G18270, AT1G52890, AT2G24430, AT1G54330, AT5…
TraesCS1A02G191700	M1		Polyketide cyclase/dehydrase	AT4G01026, AT1G73000, AT1G01360, AT5G45870, AT5G46790, AT2G40330, AT4G17870, AT4G18620, AT4G27920, AT2G38310, AT2G26040, AT5G53160, AT5G45860, AT5G05440
TraesCS1A02G191800	M1		Mitochondrial substrate/solute carrier	AT2G33820, AT5G46800, AT1G79900
TraesCS1A02G191900	M1		Mitochondrial substrate/solute carrier	AT2G33820, AT5G46800, AT1G79900
TraesCS1A02G193200	M1		Myc-type, basic helix-loop-helix (bHLH) domain	AT1G32640, AT5G46830, AT5G46760, AT4G17880
TraesCS1A02G193400	M1		Homeobox domain	AT4G17710, AT5G46880
TraesCS1A02G196000	M1			AT3G51230, AT5G66230
TraesCS1A02G196400	M1		Methyltransferase type 11	AT1G29790
TraesCS1A02G196500	M1	Plastidal glycolate/glycerate translocator 1, chloroplastic [Source:Projected from Arabidopsis thaliana (AT1G32080) UniProtKB/Swiss-Prot;Acc:Q9FVQ4]	CidB/LrgB family	AT1G32080
TraesCS1A02G197600	M1		Proton-dependent oligopeptide transporter family	AT1G69870, AT1G69860, AT3G25280, AT3G25260, AT2G26690, AT2G02040, AT1G22550, AT2G37900, AT2G02020, AT5G19640, AT1G18880, AT3G47960, AT1G72120, AT1G27040, AT1G32450, AT3G21670, AT1G68570, AT5G46050, AT1G22540, AT5G46040, AT5G11570, AT5G14940, AT1G72130, AT5G62730, AT3G16180, AT1G72140, AT3G01350, AT3G53960, AT1G69850, AT1G52190, AT3G54450, AT1G62200, AT2G40460, AT5G01180, AT5G62680, AT1G22570, AT3…
TraesCS1A02G197700	M1		Proton-dependent oligopeptide transporter family	AT1G69870, AT1G69860, AT3G25280, AT3G25260, AT2G26690, AT2G02040, AT1G22550, AT2G37900, AT2G02020, AT5G19640, AT1G18880, AT3G47960, AT1G72120, AT1G27040, AT1G32450, AT3G21670, AT1G68570, AT5G46050, AT1G22540, AT5G46040, AT5G11570, AT5G14940, AT1G72130, AT5G62730, AT3G16180, AT1G72140, AT3G01350, AT3G53960, AT1G69850, AT1G52190, AT3G54450, AT1G62200, AT2G40460, AT5G01180, AT5G62680, AT1G22570, AT3…
TraesCS1A02G197900	M1		Domain of unknown function DUF861, cupin-3	AT2G32650, AT2G32180, AT2G27402
TraesCS1A02G198400	M1	ATP-dependent Clp protease proteolytic subunit [Source:UniProtKB/TrEMBL;Acc:W4ZR65]	ATP-dependent Clp protease proteolytic subunit	AT5G45390
TraesCS1A02G198500	M1			AT4G25030, AT5G45410
TraesCS1A02G198800	M1	CASP-like protein [Source:UniProtKB/TrEMBL;Acc:W4ZM68]	Casparian strip membrane protein domain	AT2G38480
TraesCS1A02G199600	M1		Transcription factor, MADS-box	AT2G26320, AT5G20240, AT3G61120, AT1G28450, AT1G47760, AT1G65360, AT5G60910, AT1G28460, AT4G37435, AT1G26310, AT1G54760, AT1G29962, AT5G62165, AT1G31140, AT5G65070, AT3G66656, AT1G71692, AT5G65050, AT2G24840, AT2G42830, AT2G22540, AT3G57230, AT4G09960, AT4G24540, AT2G22630, AT3G04100, AT1G72350, AT5G10140, AT4G37940, AT2G45660, AT5G51860, AT5G13790, AT5G60440, AT5G23260, AT2G03060, AT5G65080, AT4…
TraesCS1A02G200000	M1		Cyanobacterial aminoacyl-tRNA synthetase, CAAD domain	AT1G52220, AT2G46820
TraesCS1A02G201200	M1			AT3G03210
TraesCS1A02G201300	M1	Histone H4 variant TH011 [Source:UniProtKB/Swiss-Prot;Acc:P62785]	Histone H4	AT1G07660, AT5G59970, AT3G46320, AT3G53730, AT3G45930, AT1G07820, AT2G28740, AT5G59690
TraesCS1A02G202000	M1	MLO-like protein [Source:UniProtKB/TrEMBL;Acc:W4ZR68]	Mlo-related protein	AT1G61560, AT1G42560, AT2G17430, AT2G39200, AT3G45290, AT4G24250, AT1G11310, AT1G11000, AT2G33670, AT2G44110, AT5G65970, AT2G17480, AT5G53760, AT1G26700, AT4G02600
TraesCS1A02G203200	M1		Expansin/pollen allergen, DPBB domain	AT3G45960, AT4G38400, AT3G45970
TraesCS1A02G204700	M1	Methyltransferase [Source:UniProtKB/TrEMBL;Acc:A0A1D5RVD4]	Methyltransferase type 11	AT1G20330, AT1G76090
TraesCS1A02G205100	M1		Zinc finger, RING-type	AT4G35840, AT5G66070, AT2G17730, AT3G20395
TraesCS1A02G206800	M1
TraesCS1A02G209100	M1	Proline dehydrogenase [Source:UniProtKB/TrEMBL;Acc:A0A341NP52]	Proline dehydrogenase domain	AT5G38710, AT3G30775
TraesCS1A02G212000	M1		Major pollen allergen Lol pI	AT5G05290, AT2G37640, AT5G39260, AT3G55500, AT5G39270, AT2G40610, AT2G20750, AT1G20190, AT1G26770, AT2G45110, AT1G69530, AT1G12560, AT5G02260, AT4G28250, AT1G62980, AT4G38210, AT4G01630, AT5G56320, AT2G28950, AT2G03090, AT3G60570, AT5G39300, AT3G29030, AT5G39290, AT1G65681, AT2G39700, AT1G65680, AT3G15370, AT3G03220, AT5G39310, AT5G39280
TraesCS1A02G212600	M1	Expansin EXPB2 [Source:UniProtKB/TrEMBL;Acc:Q6QFA2]	Major pollen allergen Lol pI	AT5G05290, AT2G37640, AT5G39260, AT3G55500, AT5G39270, AT2G40610, AT2G20750, AT1G20190, AT1G26770, AT2G45110, AT1G69530, AT1G12560, AT5G02260, AT4G28250, AT1G62980, AT4G38210, AT4G01630, AT5G56320, AT2G28950, AT2G03090, AT3G60570, AT5G39300, AT3G29030, AT5G39290, AT1G65681, AT2G39700, AT1G65680, AT3G15370, AT3G03220, AT5G39310, AT5G39280
TraesCS1A02G213600	M1		HAD hydrolase, subfamily IA	AT2G38740
TraesCS1A02G214600	M1		GroES-like superfamily	AT2G44650, AT3G60210
TraesCS1A02G214700	M1		Glycoside hydrolase, family 32	AT5G11920, AT1G62660, AT3G52600, AT1G55120, AT3G13790, AT2G36190, AT1G12240, AT3G13784
TraesCS1A02G215500	M1	Beta-amylase [Source:UniProtKB/TrEMBL;Acc:A0A1D5RW46]	Glycoside hydrolase, family 14	AT3G23920, AT4G17090
TraesCS1A02G218000	M1		Alpha/Beta hydrolase fold	AT3G60340, AT5G47330, AT4G17483, AT4G17480, AT4G17470, AT5G47340, AT5G47350
TraesCS1A02G218700	M1		Serine hydroxymethyltransferase	AT4G13930, AT1G36370, AT1G22020, AT4G13890, AT4G32520
TraesCS1A02G220400	M1		PLAC8 motif-containing protein	AT2G45010, AT5G51400
TraesCS1A02G220900	M1		Domain of unknown function DUF547	AT5G47380
TraesCS1A02G221200	M1		Oxoglutarate/iron-dependent dioxygenase	AT4G25310, AT1G78550, AT3G21420, AT4G25300, AT1G17010, AT1G17020
TraesCS1A02G222500	M1		ALOG domain	AT2G42610, AT4G18610, AT3G23290, AT1G07090, AT1G16910, AT2G31160, AT5G28490, AT3G04510, AT5G58500, AT1G78815
TraesCS1A02G223600	M1		SANT/Myb domain	AT5G17800, AT1G26780, AT4G33450, AT5G67300, AT3G50060, AT1G69560, AT1G17950, AT2G23290, AT3G29020, AT5G39700, AT1G73410, AT3G09230, AT3G55730, AT2G39880, AT4G37260
TraesCS1A02G227300	M1		Protein kinase domain	AT5G39000, AT5G28680, AT2G39360, AT5G54380, AT3G46290, AT4G39110, AT3G51550, AT5G59700, AT3G04690, AT2G23200, AT5G24010, AT1G30570, AT5G38990, AT5G61350, AT2G21480, AT5G58940
TraesCS1A02G228200	M1		PPM-type phosphatase domain	AT5G27930, AT5G36250, AT4G32950, AT3G16800, AT3G02750, AT1G03590, AT4G03415, AT5G01700, AT5G26010, AT1G79630, AT1G16220, AT3G05640
TraesCS1A02G228700	M1	Histone H2B [Source:UniProtKB/TrEMBL;Acc:A0A341NNT0]	Histone H2B	AT1G07790, AT5G22880, AT5G02570, AT3G45980, AT5G59910, AT3G09480, AT3G53650, AT3G46030, AT2G28720, AT2G37470
TraesCS1A02G228800	M1		Histone H3/CENP-A	AT1G19890, AT4G40030, AT4G40040, AT1G75600, AT5G12910, AT5G10400, AT1G01370, AT1G09200, AT5G10980, AT5G10390, AT1G13370, AT5G65350, AT5G65360, AT3G27360
TraesCS1A02G229000	M1	Histone H3 [Source:UniProtKB/TrEMBL;Acc:A0A077RTJ8]	Histone H3/CENP-A	AT1G19890, AT4G40030, AT4G40040, AT1G75600, AT5G12910, AT5G10400, AT1G01370, AT1G09200, AT5G10980, AT5G10390, AT1G13370, AT5G65350, AT5G65360, AT3G27360
TraesCS1A02G229100	M1	Histone H2B [Source:UniProtKB/TrEMBL;Acc:A0A341NPS8]	Histone H2B	AT1G07790, AT5G22880, AT5G02570, AT3G45980, AT5G59910, AT3G09480, AT3G53650, AT3G46030, AT2G28720, AT2G37470
TraesCS1A02G230400	M1		NAD(P)-binding domain	AT3G62830, AT2G28760, AT3G46440, AT3G53520, AT5G59290, AT2G47650
TraesCS1A02G231200	M1	Ethylene-responsive transcription factor RAP2-3 [Source:Projected from Arabidopsis thaliana (AT3G16770) UniProtKB/Swiss-Prot;Acc:P42736]	AP2/ERF domain	AT4G23750, AT3G15210, AT4G39780, AT5G43410, AT1G44830, AT2G36450, AT5G61890, AT2G31230, AT5G50080, AT4G34410, AT5G47220, AT2G44940, AT1G22810, AT4G16750, AT2G22200, AT1G71520, AT1G12980, AT1G33760, AT1G06160, AT3G57600, AT2G25820, AT5G18560, AT3G16770, AT4G31060, AT5G25190, AT1G22985, AT3G23230, AT1G24590, AT1G46768, AT5G53290, AT1G36060, AT2G35700, AT1G19210, AT3G14230, AT5G51190, AT1G01250, AT1…
TraesCS1A02G233700	M1	Acyl carrier protein [Source:UniProtKB/TrEMBL;Acc:W4ZSS8]	Acyl carrier protein (ACP)	AT2G44620, AT1G65290
TraesCS1A02G233800	M1		Alliinase, C-terminal	AT1G34040, AT4G24670, AT1G70560, AT1G23320, AT1G34060
TraesCS1A02G236300	M1
TraesCS1A02G237500	M1		Knottin, scorpion toxin-like superfamily
TraesCS1A02G238800	M1		EF-hand domain	AT5G37770, AT1G73630, AT2G36180, AT1G18210, AT3G03400, AT5G17470, AT1G24620
TraesCS1A02G242600	M1	Protein RETICULATA-RELATED 4, chloroplastic [Source:Projected from Arabidopsis thaliana (AT5G12470) UniProtKB/Swiss-Prot;Acc:Q94CJ5]	Protein RETICULATA-related	AT5G12470
TraesCS1A02G244300	M1	Probable membrane-associated kinase regulator 1 [Source:Projected from Arabidopsis thaliana (AT5G26230) UniProtKB/Swiss-Prot;Acc:Q3E936]	BKI1/Probable membrane-associated kinase regulator 1/3/4	AT5G26230
TraesCS1A02G246600	M1		Argininosuccinate synthase	AT4G24830
TraesCS1A02G247800	M1		Peptide-N4-(N-acetyl-beta-glucosaminyl)asparagine amidase A	AT5G05480, AT3G14920
TraesCS1A02G249500	M1		Protein kinase domain	AT3G58690, AT1G54820
TraesCS1A02G250400	M1
TraesCS1A02G250600	M1		GDSL lipase/esterase	AT5G45910, AT1G28650, AT1G31550, AT1G28580, AT1G28600, AT1G28610, AT1G28590, AT1G28660, AT5G03980, AT1G28670, AT1G28640, AT2G27360, AT1G28570
TraesCS1A02G251100	M1		GDSL lipase/esterase	AT3G62280, AT1G54790, AT3G05180, AT4G01130, AT1G56670, AT3G26430, AT1G09390, AT1G67830, AT5G14450, AT3G27950
TraesCS1A02G251200	M1		TPM domain	AT1G54780
TraesCS1A02G255100	M1	GID1 protein [Source:UniProtKB/TrEMBL;Acc:I7HQ39]	Alpha/beta hydrolase fold-3	AT3G05120, AT5G27320, AT3G63010
TraesCS1A02G255800	M1	Similar to 1-deoxy-D-xylulose-5-phosphate synthase [Source: Projected from Oryza sativa (Os05g0408900)]	Transketolase, N-terminal	AT3G21500, AT4G15560, AT5G11380
TraesCS1A02G257200	M1		AAA+ ATPase domain	AT3G28570, AT3G28580, AT5G17730, AT2G46620, AT1G43910, AT5G40010, AT5G17750, AT3G28560, AT3G28540, AT4G25835, AT4G05340, AT4G30250, AT5G17740, AT5G57480, AT2G18193, AT3G28510, AT3G29800, AT5G40000, AT4G05380, AT5G17760, AT3G50930, AT3G50940, AT2G18190, AT3G28610, AT3G28520, AT3G28600
TraesCS1A02G257300	M1		Glycosyltransferase 61	AT3G18170, AT3G18180
TraesCS1A02G259800	M1	Beta-hexosaminidase [Source:UniProtKB/TrEMBL;Acc:W4ZQX2]	Glycoside hydrolase family 20, catalytic domain	AT1G65590, AT3G55260
TraesCS1A02G260300	M1	Thioredoxin-like fold domain-containing protein MRL7L, chloroplastic [Source:Projected from Arabidopsis thaliana (AT2G31840) UniProtKB/Swiss-Prot;Acc:Q9SKB6]		AT4G28590, AT2G31840
TraesCS1A02G261900	M1	Histone H3 [Source:UniProtKB/TrEMBL;Acc:A0A077RTJ8]	Histone H3/CENP-A	AT1G19890, AT4G40030, AT4G40040, AT1G75600, AT5G12910, AT5G10400, AT1G01370, AT1G09200, AT5G10980, AT5G10390, AT1G13370, AT5G65350, AT5G65360, AT3G27360
TraesCS1A02G262000	M1	Histone H4 variant TH011 [Source:UniProtKB/Swiss-Prot;Acc:P62785]	Histone H4	AT1G07660, AT5G59970, AT3G46320, AT3G53730, AT3G45930, AT1G07820, AT2G28740, AT5G59690
TraesCS1A02G262100	M1		Alpha/beta hydrolase fold-1	AT5G38520
TraesCS1A02G262500	M1		Zinc finger, CCHC-type	AT4G38680, AT2G21060, AT2G17870, AT4G36020
TraesCS1A02G262700	M1		Transcription factor, MADS-box	AT2G26320, AT5G20240, AT3G61120, AT1G28450, AT1G47760, AT1G65360, AT5G60910, AT1G28460, AT4G37435, AT1G26310, AT1G54760, AT1G29962, AT5G62165, AT1G31140, AT5G65070, AT3G66656, AT1G71692, AT5G65050, AT2G24840, AT2G42830, AT2G22540, AT3G57230, AT4G09960, AT4G24540, AT2G22630, AT3G04100, AT1G72350, AT5G10140, AT4G37940, AT2G45660, AT5G51860, AT5G13790, AT5G60440, AT5G23260, AT2G03060, AT5G65080, AT4…
TraesCS1A02G262900	M1		GDSL lipase/esterase	AT1G33811, AT2G19010, AT1G71691, AT5G08460, AT1G71250, AT5G15720, AT2G19050, AT1G75930, AT1G29670, AT4G30140, AT4G18970, AT5G45670, AT2G19060, AT1G29660
TraesCS1A02G263500	M1		Protein of unknown function DUF538	AT1G02813, AT1G02816, AT4G02370, AT4G02360
TraesCS1A02G264300	M1	MIKC-type MADS-box transcription factor WM14 [Source:UniProtKB/TrEMBL;Acc:A9J1Y7]	Transcription factor, MADS-box	AT2G26320, AT5G20240, AT3G61120, AT1G28450, AT1G47760, AT1G65360, AT5G60910, AT1G28460, AT4G37435, AT1G26310, AT1G54760, AT1G29962, AT5G62165, AT1G31140, AT5G65070, AT3G66656, AT1G71692, AT5G65050, AT2G24840, AT2G42830, AT2G22540, AT3G57230, AT4G09960, AT4G24540, AT2G22630, AT3G04100, AT1G72350, AT5G10140, AT4G37940, AT2G45660, AT5G51860, AT5G13790, AT5G60440, AT5G23260, AT2G03060, AT5G65080, AT4…
TraesCS1A02G266000	M1		Fungal lipase-like domain	AT2G44810, AT2G30550, AT2G31690, AT1G30370, AT1G06800, AT1G51440, AT2G42690, AT4G18550, AT1G06250, AT1G05800
TraesCS1A02G266100	M1		Fungal lipase-like domain	AT2G44810, AT2G30550, AT2G31690, AT1G30370, AT1G06800, AT1G51440, AT2G42690, AT4G18550, AT1G06250, AT1G05800
TraesCS1A02G266900	M1		PB1 domain	AT3G26510, AT5G63130, AT5G09620, AT5G49920, AT3G48240, AT1G70640
TraesCS1A02G268900	M1		Alpha/beta hydrolase fold-1	AT3G54240, AT1G08310, AT5G22460, AT3G48410, AT1G74300, AT2G36290, AT1G74280, AT3G03240, AT1G74290, AT3G03230, AT3G44510
TraesCS1A02G269600	M1		Proton-dependent oligopeptide transporter family	AT1G69870, AT1G69860, AT3G25280, AT3G25260, AT2G26690, AT2G02040, AT1G22550, AT2G37900, AT2G02020, AT5G19640, AT1G18880, AT3G47960, AT1G72120, AT1G27040, AT1G32450, AT3G21670, AT1G68570, AT5G46050, AT1G22540, AT5G46040, AT5G11570, AT5G14940, AT1G72130, AT5G62730, AT3G16180, AT1G72140, AT3G01350, AT3G53960, AT1G69850, AT1G52190, AT3G54450, AT1G62200, AT2G40460, AT5G01180, AT5G62680, AT1G22570, AT3…
TraesCS1A02G270700	M1		Peptidase S8 propeptide/proteinase inhibitor I9	AT1G71950
TraesCS1A02G272100	M1		EH domain	AT4G34500, AT1G56720, AT3G17420, AT3G59110, AT4G01330, AT5G18500, AT1G01540, AT2G42960, AT1G09440, AT4G02630
TraesCS1A02G273100	M1		Tubby, C-terminal	AT2G18280, AT1G76900, AT3G06380, AT5G18680, AT1G43640, AT1G25280, AT1G61940, AT2G47900, AT1G47270, AT1G53320
TraesCS1A02G273500	M1		Inorganic pyrophosphatase	AT3G53620, AT2G46860, AT4G01480, AT2G18230, AT1G01050
TraesCS1A02G273600	M1		Protein kinase domain	AT4G23240, AT4G23230, AT4G11490, AT1G61380, AT4G04490, AT1G61460, AT1G67520, AT1G11280, AT4G23260, AT4G27290, AT4G21400, AT4G23140, AT4G23190, AT4G21410, AT4G23130, AT4G27300, AT4G00970, AT4G11530, AT4G28670, AT1G11330, AT4G11460, AT1G11410, AT4G21366, AT4G05200, AT4G11470, AT1G61490, AT1G61500, AT4G23250, AT1G61420, AT1G11300, AT1G61550, AT2G01780, AT1G70520, AT5G39370, AT3G12000, AT3G45860, AT4…
TraesCS1A02G274300	M1	Histone H3.2 [Source:UniProtKB/Swiss-Prot;Acc:P68428]	Histone H3/CENP-A	AT1G19890, AT4G40030, AT4G40040, AT1G75600, AT5G12910, AT5G10400, AT1G01370, AT1G09200, AT5G10980, AT5G10390, AT1G13370, AT5G65350, AT5G65360, AT3G27360
TraesCS1A02G275600	M1		Ovate protein family, C-terminal	AT5G04820, AT3G52540, AT2G36050
TraesCS1A02G277400	M1		Cytochrome P450	AT2G45510, AT2G45970, AT2G44890, AT2G27690, AT4G00360, AT4G39500, AT3G56630, AT2G21910, AT1G57750, AT1G13140, AT1G47620, AT3G48520, AT5G02900, AT2G23180, AT3G01900, AT1G34540, AT1G65340, AT5G52320, AT4G39480, AT4G32170, AT5G23190, AT3G26125, AT1G01600, AT1G66030, AT5G08250, AT4G39510, AT1G69500, AT5G63450, AT1G24540, AT1G13150, AT5G58860, AT1G63710, AT4G39490
TraesCS1A02G277900	M1	rRNA N-glycosidase [Source:UniProtKB/TrEMBL;Acc:W4ZRN0]	Ribosome-inactivating protein
TraesCS1A02G278600	M1		HAT (Half-A-TPR) repeat	AT2G29670, AT1G07280, AT3G47080
TraesCS1A02G278900	M1		SANT/Myb domain	AT5G08520, AT5G23650, AT3G11280, AT4G09450, AT2G38090, AT5G01200, AT5G58900, AT5G05790, AT5G04760, AT1G49010
TraesCS1A02G280300	M1		Zinc finger, RING-CH-type	AT2G34200, AT5G59000, AT5G05830, AT5G01070, AT2G37950
TraesCS1A02G280600	M1	At5g05930 [Source:Projected from Arabidopsis thaliana (AT5G05930) UniProtKB/TrEMBL;Acc:Q8L870]	Protein GUCD1	AT5G05930
TraesCS1A02G280700	M1		Universal stress protein A family	AT3G53990, AT5G49050, AT3G62550, AT3G11930, AT3G58450, AT3G17020, AT1G09740, AT3G03270, AT2G47710, AT3G25930, AT1G68300
TraesCS1A02G280900	M1		PRONE domain	AT3G55660, AT4G38430, AT5G02010, AT5G05940
TraesCS1A02G282600	M1		Aldo/keto reductase, conserved site	AT2G37760, AT5G01670, AT2G37770, AT3G53880, AT2G37790, AT5G62420
TraesCS1A02G283100	M1		Phospholipid/glycerol acyltransferase	AT3G11430, AT5G06090, AT2G38110, AT1G06520, AT4G00400, AT1G01610, AT3G11325
TraesCS1A02G283600	M1		Heavy metal-associated domain, HMA	AT2G28660, AT3G24450, AT2G37390, AT3G53530, AT5G02600
TraesCS1A02G286400	M1		Transferase	AT5G67160, AT5G42830, AT5G07860, AT3G50290, AT3G50280, AT5G07850, AT3G50270, AT3G50300, AT5G38130, AT5G07870, AT5G67150
TraesCS1A02G287000	M1
TraesCS1A02G287500	M1		Transmembrane protein GPR107/GPR108-like	AT5G42090, AT5G18520, AT5G02630, AT3G09570
TraesCS1A02G287700	M1	Histone H4 [Source:UniProtKB/TrEMBL;Acc:A0A077RYQ1]	Histone H4	AT1G07660, AT5G59970, AT3G46320, AT3G53730, AT3G45930, AT1G07820, AT2G28740, AT5G59690
TraesCS1A02G287800	M1	Histone H4 [Source:UniProtKB/TrEMBL;Acc:A0A077RYQ1]	Histone H4	AT1G07660, AT5G59970, AT3G46320, AT3G53730, AT3G45930, AT1G07820, AT2G28740, AT5G59690
TraesCS1A02G291600	M1	Histone H4 variant TH011 [Source:UniProtKB/Swiss-Prot;Acc:P62785]	Histone H4	AT1G07660, AT5G59970, AT3G46320, AT3G53730, AT3G45930, AT1G07820, AT2G28740, AT5G59690
TraesCS1A02G291700	M1	Histone H4 [Source:UniProtKB/TrEMBL;Acc:A0A077RYQ1]	Histone H4	AT1G07660, AT5G59970, AT3G46320, AT3G53730, AT3G45930, AT1G07820, AT2G28740, AT5G59690
TraesCS1A02G293000	M1		Pectinesterase inhibitor domain
TraesCS1A02G295400	M1	Histone H4 variant TH011 [Source:UniProtKB/Swiss-Prot;Acc:P62785]	Histone H4	AT1G07660, AT5G59970, AT3G46320, AT3G53730, AT3G45930, AT1G07820, AT2G28740, AT5G59690
TraesCS1A02G295700	M1	Histone H4 [Source:UniProtKB/TrEMBL;Acc:A0A077RYQ1]	Histone H4	AT1G07660, AT5G59970, AT3G46320, AT3G53730, AT3G45930, AT1G07820, AT2G28740, AT5G59690
TraesCS1A02G295900	M1		Zinc finger, RING-type	AT4G17245, AT2G35910, AT3G61550, AT1G32361, AT4G30370, AT4G10150, AT2G47560, AT2G17450, AT2G46494, AT1G49230, AT4G24015, AT2G42360, AT3G11110, AT2G37580, AT3G19140, AT5G42200, AT5G41440, AT2G44578, AT1G72310, AT1G74410, AT3G28620, AT4G17920, AT1G53820, AT1G20823, AT1G51930, AT2G28920, AT5G46650, AT5G07040, AT5G47610, AT5G01880, AT5G05280, AT4G35480, AT2G42350, AT2G46495, AT1G04360, AT2G34000, AT5…
TraesCS1A02G297800	M1	Exocyst subunit Exo70 family protein [Source:UniProtKB/TrEMBL;Acc:A0A341P0U1]	Exocyst complex component Exo70	AT5G58430, AT1G07000
TraesCS1A02G297900	M1	PRA1 family protein [Source:UniProtKB/TrEMBL;Acc:A0A1D6RDG1]	Prenylated rab acceptor PRA1	AT4G00005, AT5G01640, AT5G07110, AT2G38360, AT5G05380, AT3G56110, AT2G40380
TraesCS1A02G298800	M1		Protein maintenance of PSII under high light 1	AT5G07020
TraesCS1A02G300000	M1	RING-type E3 ubiquitin transferase [Source:UniProtKB/TrEMBL;Acc:A0A341NR74]	Armadillo	AT5G01830
TraesCS1A02G300200	M1	Expansin [Source:UniProtKB/TrEMBL;Acc:A0A1D5RVB5]	Expansin	AT5G05290, AT2G37640, AT5G39260, AT3G55500, AT5G39270, AT2G40610, AT2G20750, AT1G20190, AT1G26770, AT2G45110, AT1G69530, AT1G12560, AT5G02260, AT4G28250, AT1G62980, AT4G38210, AT4G01630, AT5G56320, AT2G28950, AT2G03090, AT3G60570, AT5G39300, AT3G29030, AT5G39290, AT1G65681, AT2G39700, AT1G65680, AT3G15370, AT3G03220, AT5G39310, AT5G39280
TraesCS1A02G301400	M1	Serine/threonine-protein kinase STN8, chloroplastic [Source:Projected from Arabidopsis thaliana (AT5G01920) UniProtKB/Swiss-Prot;Acc:Q9LZV4]	Protein kinase domain	AT5G01920
TraesCS1A02G303600	M1		LURP-one-related	AT2G38640, AT5G41590
TraesCS1A02G304900	M1		Exostosin-like	AT2G32740, AT2G32750, AT1G63450, AT2G31990, AT5G41250, AT2G29040, AT4G13990, AT2G20370
TraesCS1A02G305300	M1
TraesCS1A02G305400	M1			AT5G15260, AT3G01170, AT3G06180, AT5G19025
TraesCS1A02G306600	M1	Chlorophyll a-b binding protein, chloroplastic [Source:UniProtKB/TrEMBL;Acc:A0A341NPP5]	Chlorophyll A-B binding protein, plant	AT2G34420, AT5G54270, AT3G27690, AT1G29930, AT2G05100, AT2G05070, AT1G76570, AT2G34430, AT1G29910, AT4G10340, AT1G29920
TraesCS1A02G308500	M1			AT3G51510
TraesCS1A02G309000	M1		Leucine-rich repeat	AT5G21090
TraesCS1A02G309100	M1		Leucine-rich repeat	AT5G21090, AT3G43740
TraesCS1A02G309700	M1	Tubulin beta-5 chain [Source:UniProtKB/Swiss-Prot;Acc:Q9ZRA8]	Tubulin	AT5G12250, AT1G20010, AT5G62690, AT4G20890, AT2G29550, AT5G44340, AT5G62700, AT1G75780, AT5G23860
TraesCS1A02G309800	M1		Cyclin, C-terminal domain	AT5G06150, AT4G37490, AT1G34460, AT3G11520, AT2G26760
TraesCS1A02G312400	M1	Glycerol-3-phosphate dehydrogenase [NAD(+)] [Source:UniProtKB/TrEMBL;Acc:A0A1D5RUN3]	Glycerol-3-phosphate dehydrogenase, NAD-dependent, C-terminal	AT3G07690, AT2G41540
TraesCS1A02G313300	M1	Phosphoglycerate kinase [Source:UniProtKB/TrEMBL;Acc:A0A341NQQ5]	Phosphoglycerate kinase	AT1G79550, AT3G12780, AT1G56190
TraesCS1A02G319000	M1	Peroxidase [Source:UniProtKB/TrEMBL;Acc:A0A341NRV8]	Plant peroxidase	AT4G08780, AT4G33420, AT3G21770, AT4G08770, AT5G64110, AT2G38390, AT1G49570, AT1G14550, AT5G66390, AT5G15180, AT5G39580, AT5G06730, AT2G38380, AT2G22420, AT4G36430, AT4G26010, AT1G05260, AT1G44970, AT5G06720, AT2G39040, AT4G16270, AT3G49120, AT5G64100, AT1G71695, AT1G05240, AT3G42570, AT2G43480, AT3G32980, AT1G14540, AT5G51890, AT4G11290, AT1G34510, AT3G03670, AT5G58390, AT5G17820, AT1G68850, AT5…
TraesCS1A02G319300	M1	Glycosyltransferase [Source:UniProtKB/TrEMBL;Acc:A0A1D5RU42]	UDP-glucuronosyl/UDP-glucosyltransferase	AT3G53160, AT2G36760, AT2G36790, AT2G36780, AT2G36800, AT2G36770, AT2G36750
TraesCS1A02G319600	M1	21.7 kDa class VI heat shock protein [Source:Projected from Arabidopsis thaliana (AT5G54660) UniProtKB/Swiss-Prot;Acc:Q9FIT9]	Alpha crystallin/Hsp20 domain	AT5G54660
TraesCS1A02G320200	M1		GH3 family	AT4G37390, AT5G13370, AT2G47750, AT4G27260, AT5G13320, AT1G28130, AT1G48660, AT2G23170, AT1G23160, AT1G48670, AT2G14960, AT1G48690, AT5G54510, AT5G13360, AT5G51470, AT5G13350, AT1G59500, AT5G13380
TraesCS1A02G320500	M1		NADPH-dependent FMN reductase-like	AT4G27270, AT5G58800, AT4G36750, AT5G54500
TraesCS1A02G322600	M1		GDSL lipase/esterase	AT3G14820, AT1G75900, AT5G63170, AT1G59406, AT1G23500, AT1G20120, AT3G43570, AT1G58525, AT5G42170, AT1G75880, AT1G73610, AT3G43550, AT1G75890, AT1G58725, AT1G59030, AT1G20132
TraesCS1A02G325000	M1			AT5G36710, AT5G16250, AT3G02640, AT5G36800
TraesCS1A02G330900	M1	Inositol-tetrakisphosphate 1-kinase [Source:UniProtKB/TrEMBL;Acc:A0A341NRB4]	Inositol-tetrakisphosphate 1-kinase	AT4G33770, AT4G08170, AT5G16760
TraesCS1A02G331800	M1		Nucleotide-diphospho-sugar transferases	AT2G24630, AT4G07960, AT3G07330, AT4G16590, AT5G22740, AT5G03760, AT1G23480, AT1G24070, AT4G13410, AT4G31590, AT2G35650, AT5G16190, AT3G28180, AT3G56000
TraesCS1A02G332500	M1		X8 domain	AT5G63230, AT4G13600, AT5G08000, AT3G58100, AT1G79480, AT2G43660, AT5G53600, AT1G29380, AT5G67460, AT4G09467, AT3G28250, AT2G04910, AT5G53610, AT2G42930, AT1G18650, AT1G78520, AT1G13830, AT1G26450, AT2G30933, AT2G43670, AT4G09466, AT2G29735, AT4G09090, AT5G63225, AT1G66852, AT1G69295, AT4G09465, AT5G63250, AT4G09462, AT5G61130, AT1G09460, AT4G05430, AT1G66870, AT5G35740, AT5G63240, AT1G66855, AT2…
TraesCS1A02G339200	M1
TraesCS1A02G341300	M1	BAHD acyltransferase DCR [Source:Projected from Arabidopsis thaliana (AT5G23940) UniProtKB/Swiss-Prot;Acc:Q9FF86]	Transferase	AT5G23940
TraesCS1A02G341400	M1		Zinc finger, RING-type	AT2G38195, AT4G24204, AT5G01450, AT2G38220, AT2G38185
TraesCS1A02G342600	M1		Protein kinase domain	AT5G25930
TraesCS1A02G346600	M1		Photosystem I assembly factor PSA3	AT3G55250
TraesCS1A02G347200	M1		UDP-glucuronosyl/UDP-glucosyltransferase	AT1G07260, AT3G50740, AT4G15280, AT3G16520, AT2G18570, AT3G21760, AT4G15270, AT1G07240, AT1G07250, AT2G29750, AT1G01390, AT1G01420, AT5G26310, AT2G18560, AT4G15260, AT3G21790, AT2G29740, AT3G21780, AT5G66690, AT2G29730, AT4G01070, AT3G21800, AT2G29710, AT3G21750, AT4G36770
TraesCS1A02G348000	M1		Phytocyanin domain	AT2G25060, AT4G31840, AT4G30590, AT3G20570, AT2G23990, AT5G25090, AT5G57920
TraesCS1A02G349200	M1		Enoyl-CoA hydratase/isomerase	AT4G14430, AT4G14440, AT1G65520
TraesCS1A02G351300	M1		Rapid ALkalinization Factor	AT4G13950, AT3G16570, AT2G33775, AT1G02900, AT3G23805, AT4G15800, AT1G28270, AT2G20660, AT3G05490
TraesCS1A02G351900	M1		Glycosyltransferase 61	AT3G18170, AT3G18180
TraesCS1A02G352800	M1		ATP synthase, F0 complex, subunit G, mitochondrial	AT4G26210, AT4G29480, AT2G19680
TraesCS1A02G353800	M1		Hexapeptide repeat	AT1G55920, AT2G17640, AT5G56760, AT3G13110, AT4G35640
TraesCS1A02G359100	M1		Protein kinase domain	AT5G63370
TraesCS1A02G359800	M1	Histone H3 [Source:UniProtKB/TrEMBL;Acc:A0A077RTJ8]	Histone H3/CENP-A	AT1G19890, AT4G40030, AT4G40040, AT1G75600, AT5G12910, AT5G10400, AT1G01370, AT1G09200, AT5G10980, AT5G10390, AT1G13370, AT5G65350, AT5G65360, AT3G27360
TraesCS1A02G359900	M1	Histone H4 variant TH011 [Source:UniProtKB/Swiss-Prot;Acc:P62785]	Histone H4	AT1G07660, AT5G59970, AT3G46320, AT3G53730, AT3G45930, AT1G07820, AT2G28740, AT5G59690
TraesCS1A02G360000	M1	Histone H3 [Source:UniProtKB/TrEMBL;Acc:D8L9K7]	Histone H3/CENP-A	AT1G19890, AT4G40030, AT4G40040, AT1G75600, AT5G12910, AT5G10400, AT1G01370, AT1G09200, AT5G10980, AT5G10390, AT1G13370, AT5G65350, AT5G65360, AT3G27360
TraesCS1A02G360200	M1	Histone H3 [Source:UniProtKB/TrEMBL;Acc:A0A077RTJ8]	Histone H3/CENP-A	AT1G19890, AT4G40030, AT4G40040, AT1G75600, AT5G12910, AT5G10400, AT1G01370, AT1G09200, AT5G10980, AT5G10390, AT1G13370, AT5G65350, AT5G65360, AT3G27360
TraesCS1A02G361300	M1	Uncharacterized protein At4g29660 [Source:Projected from Arabidopsis thaliana (AT4G29660) UniProtKB/Swiss-Prot;Acc:Q94K18]	Uncharacterized protein At4g29660-like	AT4G29660
TraesCS1A02G361700	M1	Histone H3 [Source:UniProtKB/TrEMBL;Acc:D8L9K7]	Histone H3/CENP-A	AT1G19890, AT4G40030, AT4G40040, AT1G75600, AT5G12910, AT5G10400, AT1G01370, AT1G09200, AT5G10980, AT5G10390, AT1G13370, AT5G65350, AT5G65360, AT3G27360
TraesCS1A02G361900	M1	Histone H3 [Source:UniProtKB/TrEMBL;Acc:A0A077RTJ8]	Histone H3/CENP-A	AT1G19890, AT4G40030, AT4G40040, AT1G75600, AT5G12910, AT5G10400, AT1G01370, AT1G09200, AT5G10980, AT5G10390, AT1G13370, AT5G65350, AT5G65360, AT3G27360
TraesCS1A02G363000	M1	Histone H4 [Source:UniProtKB/TrEMBL;Acc:A0A077RYQ1]	Histone H4	AT1G07660, AT5G59970, AT3G46320, AT3G53730, AT3G45930, AT1G07820, AT2G28740, AT5G59690
TraesCS1A02G365400	M1		IRX15/IRX15L/IGXM	AT4G24910
TraesCS1A02G366500	M1		Cytochrome P450	AT3G10570, AT1G64930, AT1G64950, AT5G61320, AT5G04660, AT1G64940, AT1G11600, AT2G12190, AT3G10560, AT1G64900, AT3G03470, AT5G04630
TraesCS1A02G366900	M1		Protein kinase domain	AT3G50310, AT1G05100, AT1G07150, AT4G36950, AT5G67080, AT2G32510, AT5G55090, AT4G26890
TraesCS1A02G368000	M1	Histone H2B [Source:UniProtKB/TrEMBL;Acc:A0A0C4BIL4]	Histone H2B	AT1G07790, AT5G22880, AT5G02570, AT3G45980, AT5G59910, AT3G09480, AT3G53650, AT3G46030, AT2G28720, AT2G37470
TraesCS1A02G371900	M1		Serine/threonine dehydratase, pyridoxal-phosphate-binding site	AT4G29840, AT1G72810
TraesCS1A02G374200	M1		Bifunctional inhibitor/plant lipid transfer protein/seed storage helical domain	AT1G07747, AT1G66850, AT5G38195, AT1G43665, AT5G38170, AT1G73780, AT2G14846, AT1G43667, AT4G12825, AT3G18280, AT5G38197, AT1G43666, AT3G57310, AT5G38180, AT5G38160, AT1G48750
TraesCS1A02G375000	M1		Protein of unknown function DUF1639	AT4G17440, AT1G48770, AT3G60410, AT1G25370, AT1G68340, AT3G18295
TraesCS1A02G380700	M1		Histone chaperone ASF1-like	AT5G38110, AT1G66740
TraesCS1A02G388600	M1	Histone H2B [Source:UniProtKB/TrEMBL;Acc:W4ZPQ9]	Histone H2B	AT1G07790, AT5G22880, AT5G02570, AT3G45980, AT5G59910, AT3G09480, AT3G53650, AT3G46030, AT2G28720, AT2G37470
TraesCS1A02G392000	M1	Photosystem I reaction center subunit VI, chloroplast precursor (PSI- H) (Light-harvesting complex I 11 kDa protein) (GOS5 protein) [Source: Projected from Oryza sativa (Os05g0560000)]	Photosystem I PsaH, reaction centre subunit VI	AT1G52230, AT3G16140
TraesCS1A02G393900	M1		Protein Casparian strip integrity factor 1/2	AT2G16385
TraesCS1A02G395300	M1		DnaJ domain	AT5G25530, AT1G10350, AT2G20560, AT1G59725, AT3G47940, AT2G20550, AT3G08910, AT4G28480, AT5G01390
TraesCS1A02G395800	M1		Protein DMP	AT1G09157, AT4G24310, AT5G46090, AT4G18425, AT3G21520, AT5G39650, AT3G21550, AT5G27370, AT3G02430, AT4G28485
TraesCS1A02G396200	M1	Xyloglucan endotransglucosylase/hydrolase [Source:UniProtKB/TrEMBL;Acc:Q56TP3]	Glycoside hydrolase family 16	AT5G57550
TraesCS1A02G396600	M1	E3 SUMO-protein ligase MMS21 [Source:Projected from Arabidopsis thaliana (AT3G15150) UniProtKB/Swiss-Prot;Acc:Q8GYH7]	Zinc finger, MIZ-type	AT3G15150
TraesCS1A02G396700	M1		FAS1 domain	AT5G03170, AT5G60490, AT2G20520, AT1G03870, AT5G44130
TraesCS1A02G396800	M1	Fasciclin-like protein FLA15 [Source:UniProtKB/TrEMBL;Acc:Q06I91]	FAS1 domain	AT5G03170, AT5G60490, AT2G20520, AT1G03870, AT5G44130
TraesCS1A02G396900	M1		Glutaredoxin	AT1G28480
TraesCS1A02G397400	M1		Ubiquitin-like domain	AT1G23410, AT1G65350, AT4G05050, AT1G11980, AT3G52590, AT3G62250, AT2G35635, AT1G55060, AT1G53950, AT2G36170, AT5G37640, AT3G09790, AT1G31340, AT5G03240, AT2G47110, AT4G02890, AT5G20620, AT4G05320, AT1G53930, AT1G53945
TraesCS1A02G399900	M1		Cytochrome b561/ferric reductase transmembrane	AT4G18260, AT2G30890
TraesCS1A02G400500	M1		Uncharacterised protein family Ycf23
TraesCS1A02G401800	M1		WRKY domain	AT4G30935, AT1G62300, AT5G56270, AT3G01970, AT5G41570, AT5G15130, AT4G04450, AT5G07100, AT4G18170, AT1G18860, AT2G37260, AT1G64000, AT2G25000, AT1G80840, AT1G29860, AT4G26640, AT1G69310, AT4G39410, AT2G04880, AT3G01080, AT2G47260, AT2G21900, AT1G68150, AT4G31800, AT5G49520, AT5G26170, AT2G44745, AT4G01720, AT5G64810, AT2G46130, AT2G38470, AT3G62340, AT2G30250, AT1G13960, AT2G40740, AT4G22070, AT5…
TraesCS1A02G403000	M1		Cold-regulated 413 protein	AT1G29395, AT1G29390
TraesCS1A02G403300	M1	Chlorophyll a-b binding protein, chloroplastic [Source:UniProtKB/TrEMBL;Acc:A0A1D5RS51]	Chlorophyll A-B binding protein, plant	AT2G34420, AT5G54270, AT3G27690, AT1G29930, AT2G05100, AT2G05070, AT1G76570, AT2G34430, AT1G29910, AT4G10340, AT1G29920
TraesCS1A02G403800	M1	Chlorophyll a-b binding protein, chloroplastic [Source:UniProtKB/TrEMBL;Acc:A0A1D5RQT5]	Chlorophyll A-B binding protein, plant	AT2G34420, AT5G54270, AT3G27690, AT1G29930, AT2G05100, AT2G05070, AT1G76570, AT2G34430, AT1G29910, AT4G10340, AT1G29920
TraesCS1A02G404200	M1		NADH-ubiquinone reductase complex 1 MLRQ subunit	AT3G29970, AT3G48140
TraesCS1A02G404600	M1		Peptidase S8/S53 domain	AT4G10540, AT5G03620, AT5G59110, AT5G59120, AT4G21323, AT5G67360, AT1G66220, AT4G15040, AT5G45650, AT1G20160, AT4G10510, AT2G39850, AT3G46850, AT4G21640, AT3G46840, AT1G04110, AT4G10530, AT5G58830, AT5G59810, AT5G58840, AT5G58820, AT4G10520, AT4G00230, AT5G59090, AT4G26330, AT3G14067, AT1G01900, AT1G32980, AT2G04160, AT5G45640, AT1G32960, AT4G21630, AT5G67090, AT5G59100, AT3G14240, AT2G05920, AT4…
TraesCS1A02G405600	M1		Sugar/inositol transporter	AT3G05155, AT1G08920, AT1G08900, AT1G08890, AT2G48020, AT1G08930, AT5G27360, AT1G19450, AT4G04760, AT1G54730, AT1G75220, AT5G18840, AT3G05150, AT4G04750, AT3G20460, AT5G27350, AT3G05160, AT3G05165, AT3G05400
TraesCS1A02G405900	M1		Protein of unknown function DUF594	AT5G45530, AT5G45480, AT5G45470
TraesCS1A02G406200	M1	3-ketoacyl-CoA synthase [Source:UniProtKB/TrEMBL;Acc:A0A341NTZ3]	Very-long-chain 3-ketoacyl-CoA synthase	AT2G28630, AT4G34510, AT3G10280, AT2G16280, AT2G15090, AT1G25450, AT2G26250, AT5G49070, AT5G04530, AT1G01120, AT5G43760, AT1G71160, AT2G46720, AT1G07720, AT2G26640, AT1G68530, AT3G52160, AT4G34250, AT1G19440, AT4G34520, AT1G04220
TraesCS1A02G408200	M1		Protein of unknown function DUF1645, plant	AT3G27880, AT1G70420, AT1G23710, AT5G62770
TraesCS1A02G411100	M1	Ethylene-responsive transcription factor ERF061 [Source:Projected from Arabidopsis thaliana (AT1G64380) UniProtKB/Swiss-Prot;Acc:Q9C7W2]	AP2/ERF domain	AT4G23750, AT3G15210, AT4G39780, AT5G43410, AT1G44830, AT2G36450, AT5G61890, AT2G31230, AT5G50080, AT4G34410, AT5G47220, AT2G44940, AT1G22810, AT4G16750, AT2G22200, AT1G71520, AT1G12980, AT1G33760, AT1G06160, AT3G57600, AT2G25820, AT5G18560, AT3G16770, AT4G31060, AT5G25190, AT1G22985, AT3G23230, AT1G24590, AT1G46768, AT5G53290, AT1G36060, AT2G35700, AT1G19210, AT3G14230, AT5G51190, AT1G01250, AT1…
TraesCS1A02G412100	M1		Protein CHUP1-like	AT3G25690, AT1G48280, AT1G07120, AT4G18570
TraesCS1A02G413700	M1		Amidase	AT5G64440, AT3G25660
TraesCS1A02G413800	M1		Transcription factor GRAS	AT1G14920, AT5G17490, AT1G66350, AT2G01570, AT3G03450
TraesCS1A02G414300	M1		Zinc finger, CCCH-type	AT1G66810, AT1G68200
TraesCS1A02G417800	M1		3-beta hydroxysteroid dehydrogenase/isomerase	AT5G14700
TraesCS1A02G423700	M1		Late embryogenesis abundant protein, LEA_2 subgroup	AT2G46150, AT4G23610
TraesCS1A02G424500	M1		Transporter protein SLAC1/Mae1/ Ssu1/TehA	AT5G24030, AT4G27970, AT1G12480
TraesCS1A02G425200	M1		Probable zinc-ribbon domain, plant	AT4G01090, AT1G01440, AT2G46380, AT3G61670
TraesCS1A02G426400	M1
TraesCS1A02G427400	M1		Tetratricopeptide repeat 1	AT3G14950, AT2G42580, AT1G53300, AT3G58620
TraesCS1A02G439600	M1			AT1G55160, AT2G19530, AT5G56850
TraesCS1A02G443300	M1
TraesCS1B02G000600	M1		Ribosomal protein L28	AT2G33450
TraesCS1B02G001400	M1
TraesCS1B02G002300	M1		NB-ARC	AT3G14460
TraesCS1B02G002400	M1		P-loop containing nucleoside triphosphate hydrolase	AT3G14460
TraesCS1B02G011100	M1	Peptidyl-prolyl cis-trans isomerase [Source:UniProtKB/TrEMBL;Acc:Q6XPZ4]	Cyclophilin-type peptidyl-prolyl cis-trans isomerase domain	AT3G63400, AT2G29960, AT2G15790, AT3G62030, AT4G34870, AT4G38740, AT2G38730, AT3G55920, AT5G58710, AT4G32420, AT3G22920, AT4G34960, AT2G16600, AT5G13120, AT3G56070, AT2G21130
TraesCS1B02G011500	M1		Protein of unknown function DUF3339	AT5G40960, AT3G27030, AT3G48660, AT3G27027, AT5G40980, AT5G08391, AT3G01950, AT5G63500, AT5G50660, AT5G14110, AT5G50560, AT3G01940
TraesCS1B02G014000	M1			AT4G12340
TraesCS1B02G018900	M1		Small GTPase	AT1G28550, AT3G15060, AT1G06400, AT1G16920, AT2G33870, AT3G07410, AT3G46830, AT1G73640, AT1G05810, AT4G18800, AT1G07410, AT2G43130, AT5G46025, AT5G59150, AT5G60860, AT5G47520, AT1G18200, AT2G31680, AT4G18430, AT5G45750, AT1G09630
TraesCS1B02G022000	M1		Protein kinase domain	AT4G00340, AT4G32300, AT5G35370, AT5G24080, AT2G19130
TraesCS1B02G036900	M1		Zinc finger, RING-type	AT3G46620, AT2G39720, AT5G59550
TraesCS1B02G037700	M1		Rab5-interacting protein	AT5G59410, AT2G29020
TraesCS1B02G042200	M1		Metallothionein, family 15, plant
TraesCS1B02G044800	M1		ENTH/VHS	AT1G03050, AT2G25430, AT4G32285, AT4G02650, AT1G05020
TraesCS1B02G049100	M1	Histone H2A [Source:UniProtKB/TrEMBL;Acc:W5A8H1]	Histone H2A	AT1G54690, AT4G27230, AT3G20670, AT1G51060, AT5G27670, AT5G59870, AT5G54640, AT1G08880, AT5G02560
TraesCS1B02G057900	M1	7,8-dihydroneopterin aldolase [Source:UniProtKB/TrEMBL;Acc:A0A1D5SKN3]	Dihydroneopterin aldolase	AT3G21730, AT3G11750, AT5G62980
TraesCS1B02G064600	M1		Glycoside hydrolase family 18, catalytic domain	AT5G24090
TraesCS1B02G067000	M1		Knottin, scorpion toxin-like	AT5G63660, AT2G02100, AT2G02130, AT2G02140, AT2G02120, AT1G61070, AT2G31953, AT2G31957, AT2G02147
TraesCS1B02G067100	M1		Knottin, scorpion toxin-like	AT5G63660, AT2G02100, AT2G02130, AT2G02140, AT2G02120, AT1G61070, AT2G31953, AT2G31957, AT2G02147
TraesCS1B02G068500	M1
TraesCS1B02G068700	M1		Short transmembrane mitochondrial protein 1	AT4G25225, AT2G35736
TraesCS1B02G069200	M1		GDSL lipase/esterase	AT3G62280, AT1G54790, AT3G05180, AT4G01130, AT1G56670, AT3G26430, AT1G09390, AT1G67830, AT5G14450, AT3G27950
TraesCS1B02G073700	M1		Inosine/uridine-preferring nucleoside hydrolase domain	AT1G05620, AT2G36310
TraesCS1B02G075200	M1	Glutamyl-tRNA reductase [Source:UniProtKB/TrEMBL;Acc:A0A1D5SNF8]	Tetrapyrrole biosynthesis, glutamyl-tRNA reductase	AT1G58290, AT1G09940, AT2G31250
TraesCS1B02G076100	M1		EGF-type aspartate/asparagine hydroxylation site	AT1G21250, AT1G16120, AT1G22720, AT1G16090, AT1G79680, AT1G21210, AT3G25490, AT1G16150, AT1G16130, AT1G19390, AT1G79670, AT1G21270, AT4G31100, AT1G17910, AT1G16160, AT1G21240, AT1G16110, AT4G31110, AT1G21230, AT1G16260, AT1G69730
TraesCS1B02G076400	M1		Ribosomal protein L10P	AT3G12370, AT5G13510
TraesCS1B02G077500	M1	Patatin [Source:UniProtKB/TrEMBL;Acc:W5A9I4]	Patatin-like phospholipase domain	AT4G37060, AT4G37050, AT5G43590, AT2G26560, AT4G37070
TraesCS1B02G077800	M1		PWWP domain	AT3G54760, AT5G02950, AT3G09670
TraesCS1B02G079800	M1
TraesCS1B02G083500	M1		Peptidase S59, nucleoporin	AT1G10390, AT1G59660
TraesCS1B02G084000	M1			AT5G03110, AT2G37100
TraesCS1B02G084500	M1		Protein kinase domain	AT3G45410, AT3G59740, AT3G59730, AT3G55550, AT2G43700, AT3G45330, AT5G60310, AT1G07460, AT3G45390, AT5G03140, AT5G03350, AT1G53060, AT3G53810, AT5G10530, AT5G60270, AT1G70130, AT5G01540, AT5G65600, AT3G59750, AT2G43690, AT2G29220, AT1G15530, AT3G15356, AT4G02410, AT1G53080, AT3G45440, AT5G59270, AT1G53070, AT5G01560, AT3G53380, AT2G37710, AT2G29250, AT4G02420, AT5G60280, AT1G70110, AT5G55830, AT5…
TraesCS1B02G086500	M1			AT4G08330
TraesCS1B02G088600	M1		Oxoglutarate/iron-dependent dioxygenase	AT3G11180, AT3G55970, AT5G05600, AT2G38240
TraesCS1B02G091500	M1	Basic region/leucine zipper protein [Source:UniProtKB/TrEMBL;Acc:A9ZPJ0]	Basic-leucine zipper domain	AT5G15830, AT4G37730, AT4G34590, AT1G75390, AT5G49450, AT3G62420, AT2G18160, AT2G22850
TraesCS1B02G091900	M1		Protein kinase domain	AT4G23240, AT4G23230, AT4G11490, AT1G61380, AT4G04490, AT1G61460, AT1G67520, AT1G11280, AT4G23260, AT4G27290, AT4G21400, AT4G23140, AT4G23190, AT4G21410, AT4G23130, AT4G27300, AT4G00970, AT4G11530, AT4G28670, AT1G11330, AT4G11460, AT1G11410, AT4G21366, AT4G05200, AT4G11470, AT1G61490, AT1G61500, AT4G23250, AT1G61420, AT1G11300, AT1G61550, AT2G01780, AT1G70520, AT5G39370, AT3G12000, AT3G45860, AT4…
TraesCS1B02G093600	M1		AMP-dependent synthetase/ligase	AT2G47240
TraesCS1B02G094600	M1	Nitrogen regulatory protein P-II homolog [Source:Projected from Arabidopsis thaliana (AT4G01900) UniProtKB/Swiss-Prot;Acc:Q9ZST4]	Nitrogen regulatory protein PII	AT4G01900
TraesCS1B02G095800	M1	Peroxidase [Source:UniProtKB/TrEMBL;Acc:W5A8K7]	Plant peroxidase	AT4G33420
TraesCS1B02G096200	M1	Peroxidase [Source:UniProtKB/TrEMBL;Acc:W5A9M2]	Plant peroxidase	AT4G08780, AT4G33420, AT3G21770, AT4G08770, AT5G64110, AT2G38390, AT1G49570, AT1G14550, AT5G66390, AT5G15180, AT5G39580, AT5G06730, AT2G38380, AT2G22420, AT4G36430, AT4G26010, AT1G05260, AT1G44970, AT5G06720, AT2G39040, AT4G16270, AT3G49120, AT5G64100, AT1G71695, AT1G05240, AT3G42570, AT2G43480, AT3G32980, AT1G14540, AT5G51890, AT4G11290, AT1G34510, AT3G03670, AT5G58390, AT5G17820, AT1G68850, AT5…
TraesCS1B02G097400	M1		Glutathione S-transferase, N-terminal	AT1G02930, AT2G30870, AT1G49860, AT4G02520, AT5G17220, AT1G02920, AT2G47730, AT1G02950, AT3G03190, AT2G02930, AT3G62760, AT2G30860, AT1G02940
TraesCS1B02G101800	M1		Phosphoglycerate/bisphosphoglycerate mutase, active site	AT3G05170, AT1G08940
TraesCS1B02G108400	M1		GDSL lipase/esterase	AT5G45910, AT1G28650, AT1G31550, AT1G28580, AT1G28600, AT1G28610, AT1G28590, AT1G28660, AT5G03980, AT1G28670, AT1G28640, AT2G27360, AT1G28570
TraesCS1B02G111600	M1		F-box-like domain superfamily
TraesCS1B02G112300	M1		Ribosomal protein S27/S33, mitochondrial	AT5G44710
TraesCS1B02G117400	M1		Oxoglutarate/iron-dependent dioxygenase	AT1G77330
TraesCS1B02G117800	M1		Glycosyl transferase CAP10 domain	AT1G63420, AT2G45840, AT3G61270, AT5G23850, AT3G61280, AT2G45830, AT1G07220, AT3G61290, AT3G48980
TraesCS1B02G119600	M1		Protein kinase domain	AT1G67580
TraesCS1B02G119700	M1		Protein kinase domain	AT1G67580
TraesCS1B02G120300	M1		Tetrahydrofolate dehydrogenase/cyclohydrolase	AT2G38660, AT3G12290, AT4G00620, AT4G00600
TraesCS1B02G124200	M1		RNA polymerase Rpb7-like , N-terminal	AT4G14660, AT4G14520, AT3G22900
TraesCS1B02G124300	M1		Nucleic acid-binding, OB-fold	AT4G14660, AT4G14520, AT3G22900
TraesCS1B02G126900	M1		NADH dehydrogenase-like complex, subunit S	AT4G23890
TraesCS1B02G127900	M1		Peptidase M17, leucyl aminopeptidase, C-terminal	AT4G30920, AT2G24200, AT4G30910
TraesCS1B02G128800	M1	Transition metal ion transporter, Ion transpor [Source: Projected from Oryza sativa (Os05g0164800)]	Zinc/iron permease	AT1G05300, AT4G19690, AT3G12750, AT5G62160, AT4G19680, AT4G33020, AT1G60960, AT2G04032, AT1G10970, AT1G31260, AT2G32270, AT2G30080
TraesCS1B02G133900	M1	Tryptophan aminotransferase related 2 [Source:UniProtKB/TrEMBL;Acc:W5AA27]	Alliinase, C-terminal	AT1G34040, AT4G24670, AT1G70560, AT1G23320, AT1G34060
TraesCS1B02G135300	M1		Embryo-specific ATS3	AT5G07190, AT5G62210, AT5G62200, AT2G41475
TraesCS1B02G136000	M1			AT2G24440, AT4G31360
TraesCS1B02G136700	M1		PAM2-containing protein CID1/CID2	AT4G14270, AT2G41430
TraesCS1B02G136800	M1			AT3G15630, AT1G52720
TraesCS1B02G136900	M1			AT3G15630, AT1G52720
TraesCS1B02G137200	M1			AT3G15630, AT1G52720
TraesCS1B02G138700	M1		UDP-glucuronosyl/UDP-glucosyltransferase	AT4G15550, AT4G14090, AT1G05530, AT1G05560
TraesCS1B02G139000	M1		Leucine-rich repeat	AT1G49490, AT3G24480, AT2G15880, AT4G18670, AT4G28380, AT1G62440, AT4G13340, AT3G19020, AT5G25550, AT1G12040, AT3G22800, AT4G33970
TraesCS1B02G139200	M1		Zf-FLZ domain	AT1G79970, AT2G25690, AT5G11460
TraesCS1B02G139900	M1			AT1G71730
TraesCS1B02G141100	M1		Harbinger transposase-derived nuclease domain	AT4G29780, AT5G12010, AT1G72275, AT3G55350, AT3G63270, AT3G19120
TraesCS1B02G141700	M1	Malic enzyme [Source:UniProtKB/TrEMBL;Acc:A0A341PAE7]	Malic oxidoreductase	AT5G11670, AT1G79750, AT5G25880, AT2G19900
TraesCS1B02G142400	M1		Mitochondrial substrate/solute carrier	AT5G19760
TraesCS1B02G143600	M1
TraesCS1B02G144700	M1		Late embryogenesis abundant protein, LEA_2 subgroup	AT1G17620, AT5G11890
TraesCS1B02G145300	M1		GDSL lipase/esterase	AT5G45910, AT1G28650, AT1G31550, AT1G28580, AT1G28600, AT1G28610, AT1G28590, AT1G28660, AT5G03980, AT1G28670, AT1G28640, AT2G27360, AT1G28570
TraesCS1B02G147400	M1		Transporter protein SLAC1/Mae1/ Ssu1/TehA	AT5G24030, AT4G27970, AT1G12480
TraesCS1B02G152100	M1		Small GTPase	AT5G47960, AT5G65270, AT3G12160, AT4G39990
TraesCS1B02G161100	M1		Shugoshin, C-terminal	AT3G44960, AT5G04320, AT3G10440
TraesCS1B02G166100	M1	Ribosomal protein L17 [Source:UniProtKB/TrEMBL;Acc:Q5I7K4]	Ribosomal protein L14P	AT3G04400, AT2G33370, AT1G04480
TraesCS1B02G168000	M1		Proton-dependent oligopeptide transporter family	AT1G69870, AT1G69860, AT3G25280, AT3G25260, AT2G26690, AT2G02040, AT1G22550, AT2G37900, AT2G02020, AT5G19640, AT1G18880, AT3G47960, AT1G72120, AT1G27040, AT1G32450, AT3G21670, AT1G68570, AT5G46050, AT1G22540, AT5G46040, AT5G11570, AT5G14940, AT1G72130, AT5G62730, AT3G16180, AT1G72140, AT3G01350, AT3G53960, AT1G69850, AT1G52190, AT3G54450, AT1G62200, AT2G40460, AT5G01180, AT5G62680, AT1G22570, AT3…
TraesCS1B02G169500	M1	3-ketoacyl-CoA synthase [Source:UniProtKB/TrEMBL;Acc:A0A1D6REB8]	Very-long-chain 3-ketoacyl-CoA synthase	AT2G28630, AT4G34510, AT3G10280, AT2G16280, AT2G15090, AT1G25450, AT2G26250, AT5G49070, AT5G04530, AT1G01120, AT5G43760, AT1G71160, AT2G46720, AT1G07720, AT2G26640, AT1G68530, AT3G52160, AT4G34250, AT1G19440, AT4G34520, AT1G04220
TraesCS1B02G173400	M1		Sugar phosphate transporter domain	AT2G28315, AT2G30460, AT1G06890
TraesCS1B02G173700	M1	Auxin response factor [Source:UniProtKB/TrEMBL;Acc:A0A1D5SG93]	PB1 domain	AT4G30080, AT1G77850, AT2G28350
TraesCS1B02G174300	M1			AT2G28430
TraesCS1B02G178500	M1		Dim1 family	AT5G08290, AT3G24730
TraesCS1B02G182700	M1		Ubiquitin-like domain	AT1G23410, AT1G65350, AT4G05050, AT1G11980, AT3G52590, AT3G62250, AT2G35635, AT1G55060, AT1G53950, AT2G36170, AT5G37640, AT3G09790, AT1G31340, AT5G03240, AT2G47110, AT4G02890, AT5G20620, AT4G05320, AT1G53930, AT1G53945
TraesCS1B02G183600	M1		Romo1/Mgr2	AT3G07910, AT4G34139
TraesCS1B02G186300	M1	NADPH-protochlorophyllide oxidoreductase [Source:UniProtKB/TrEMBL;Acc:A0A341P2Z0]	Short-chain dehydrogenase/reductase SDR	AT4G27440, AT1G03630, AT5G54190
TraesCS1B02G186800	M1		Calponin homology domain	AT5G62500, AT3G47690, AT5G67270
TraesCS1B02G189400	M1		Bifunctional inhibitor/plant lipid transfer protein/seed storage helical domain	AT1G07747, AT1G66850, AT5G38195, AT1G43665, AT5G38170, AT1G73780, AT2G14846, AT1G43667, AT4G12825, AT3G18280, AT5G38197, AT1G43666, AT3G57310, AT5G38180, AT5G38160, AT1G48750
TraesCS1B02G190000	M1		Tetraspanin	AT1G63260
TraesCS1B02G194300	M1		Glutathione S-transferase, N-terminal	AT1G78360, AT1G59700, AT1G78380, AT1G78370, AT1G78320, AT1G10360, AT1G59670, AT1G17190, AT2G29440, AT1G17170, AT1G27130, AT3G43800, AT1G10370, AT2G29460, AT3G09270, AT2G29490, AT2G29420, AT2G29470, AT1G69920, AT5G62480, AT1G17180, AT2G29450, AT1G27140, AT1G53680, AT2G29480, AT1G69930, AT1G78340, AT1G74590
TraesCS1B02G195100	M1		Peptidase S8/S53 domain	AT4G10540, AT5G03620, AT5G59110, AT5G59120, AT4G21323, AT5G67360, AT1G66220, AT4G15040, AT5G45650, AT1G20160, AT4G10510, AT2G39850, AT3G46850, AT4G21640, AT3G46840, AT1G04110, AT4G10530, AT5G58830, AT5G59810, AT5G58840, AT5G58820, AT4G10520, AT4G00230, AT5G59090, AT4G26330, AT3G14067, AT1G01900, AT1G32980, AT2G04160, AT5G45640, AT1G32960, AT4G21630, AT5G67090, AT5G59100, AT3G14240, AT2G05920, AT4…
TraesCS1B02G196200	M1		Armadillo	AT1G01830, AT2G45720
TraesCS1B02G196600	M1	Rhomboid-like protein [Source:UniProtKB/TrEMBL;Acc:W5A7B5]	Peptidase S54, rhomboid	AT2G29050, AT1G12750, AT4G23070, AT3G53780, AT5G07250, AT1G63120, AT1G77860, AT1G52580
TraesCS1B02G197000	M1		Alpha/beta hydrolase fold-1	AT3G54240, AT1G08310, AT5G22460, AT3G48410, AT1G74300, AT2G36290, AT1G74280, AT3G03240, AT1G74290, AT3G03230, AT3G44510, AT3G09690, AT5G02970
TraesCS1B02G199500	M1		Protein of unknown function DUF538	AT5G46230, AT1G30020, AT1G09310, AT4G24130, AT1G56580
TraesCS1B02G201400	M1	Similar to actin [Source: Projected from Oryza sativa (Os10g0510000)]	Actin family	AT2G42100, AT2G37620, AT3G46520, AT2G42170, AT5G59370, AT5G09810, AT1G49240, AT2G42090, AT3G12110, AT3G53750, AT3G18780
TraesCS1B02G201800	M1		Small auxin-up RNA	AT3G61900, AT2G46690, AT4G00880, AT5G53590
TraesCS1B02G203000	M1		Cytochrome P450	AT3G10570, AT1G64930, AT1G64950, AT5G61320, AT5G04660, AT1G64940, AT1G11600, AT2G12190, AT3G10560, AT1G64900, AT3G03470, AT5G04630
TraesCS1B02G203200	M1		Protein kinase domain	AT1G33260, AT4G10390, AT3G49670
TraesCS1B02G203800	M1	YABBY family transcription factor, Leaf developmen [Source: Projected from Oryza sativa (Os10g0508300)]	YABBY protein	AT4G00180, AT2G45190
TraesCS1B02G206600	M1		Polyketide cyclase/dehydrase	AT4G01026, AT1G73000, AT1G01360, AT5G45870, AT5G46790, AT2G40330, AT4G17870, AT4G18620, AT4G27920, AT2G38310, AT2G26040, AT5G53160, AT5G45860, AT5G05440
TraesCS1B02G206800	M1		Mitochondrial substrate/solute carrier	AT2G33820, AT5G46800, AT1G79900
TraesCS1B02G206900	M1		Mitochondrial carrier UCP-like	AT2G33820, AT5G46800, AT1G79900
TraesCS1B02G208400	M1		Homeobox domain	AT4G17710, AT5G46880
TraesCS1B02G208900	M1		Protein SAMBA	AT1G32310
TraesCS1B02G209700	M1		NAD-dependent epimerase/dehydratase	AT2G23910, AT4G30470
TraesCS1B02G210600	M1			AT3G51230, AT5G66230
TraesCS1B02G211000	M1		Methyltransferase type 11	AT1G29790
TraesCS1B02G211100	M1	Plastidal glycolate/glycerate translocator 1, chloroplastic [Source:Projected from Arabidopsis thaliana (AT1G32080) UniProtKB/Swiss-Prot;Acc:Q9FVQ4]	CidB/LrgB family	AT1G32080
TraesCS1B02G212400	M1		Proton-dependent oligopeptide transporter family	AT1G69870, AT1G69860, AT3G25280, AT3G25260, AT2G26690, AT2G02040, AT1G22550, AT2G37900, AT2G02020, AT5G19640, AT1G18880, AT3G47960, AT1G72120, AT1G27040, AT1G32450, AT3G21670, AT1G68570, AT5G46050, AT1G22540, AT5G46040, AT5G11570, AT5G14940, AT1G72130, AT5G62730, AT3G16180, AT1G72140, AT3G01350, AT3G53960, AT1G69850, AT1G52190, AT3G54450, AT1G62200, AT2G40460, AT5G01180, AT5G62680, AT1G22570, AT3…
TraesCS1B02G213600	M1		Putative S-adenosyl-L-methionine-dependent methyltransferase	AT4G19120, AT1G31850
TraesCS1B02G213900	M1	Patellin-6 [Source:Projected from Arabidopsis thaliana (AT3G51670) UniProtKB/Swiss-Prot;Acc:Q9SCU1]	CRAL-TRIO lipid binding domain	AT1G72160, AT3G51670, AT4G09160, AT1G72150, AT1G30690, AT1G22530
TraesCS1B02G214700	M1		Cyanobacterial aminoacyl-tRNA synthetase, CAAD domain	AT1G52220, AT2G46820
TraesCS1B02G217200	M1		Expansin/pollen allergen, DPBB domain	AT3G45960, AT4G38400, AT3G45970
TraesCS1B02G218300	M1	Methyltransferase [Source:UniProtKB/TrEMBL;Acc:A0A341P435]	Methyltransferase type 11	AT1G20330, AT1G76090
TraesCS1B02G218700	M1		Zinc finger, RING-type	AT4G35840, AT5G66070, AT2G17730, AT3G20395
TraesCS1B02G220500	M1
TraesCS1B02G221600	M1	Histone H4 [Source:UniProtKB/TrEMBL;Acc:A0A077RYQ1]	Histone H4	AT1G07660, AT5G59970, AT3G46320, AT3G53730, AT3G45930, AT1G07820, AT2G28740, AT5G59690
TraesCS1B02G223300	M1	Proline dehydrogenase [Source:UniProtKB/TrEMBL;Acc:A0A1D5SGW0]	Proline dehydrogenase domain	AT5G38710, AT3G30775
TraesCS1B02G224500	M1		Exostosin-like	AT4G22580
TraesCS1B02G225700	M1		Major pollen allergen Lol pI	AT5G05290, AT2G37640, AT5G39260, AT3G55500, AT5G39270, AT2G40610, AT2G20750, AT1G20190, AT1G26770, AT2G45110, AT1G69530, AT1G12560, AT5G02260, AT4G28250, AT1G62980, AT4G38210, AT4G01630, AT5G56320, AT2G28950, AT2G03090, AT3G60570, AT5G39300, AT3G29030, AT5G39290, AT1G65681, AT2G39700, AT1G65680, AT3G15370, AT3G03220, AT5G39310, AT5G39280
TraesCS1B02G225900	M1		Major pollen allergen Lol pI	AT5G05290, AT2G37640, AT5G39260, AT3G55500, AT5G39270, AT2G40610, AT2G20750, AT1G20190, AT1G26770, AT2G45110, AT1G69530, AT1G12560, AT5G02260, AT4G28250, AT1G62980, AT4G38210, AT4G01630, AT5G56320, AT2G28950, AT2G03090, AT3G60570, AT5G39300, AT3G29030, AT5G39290, AT1G65681, AT2G39700, AT1G65680, AT3G15370, AT3G03220, AT5G39310, AT5G39280
TraesCS1B02G226100	M1		Major pollen allergen Lol pI	AT5G05290, AT2G37640, AT5G39260, AT3G55500, AT5G39270, AT2G40610, AT2G20750, AT1G20190, AT1G26770, AT2G45110, AT1G69530, AT1G12560, AT5G02260, AT4G28250, AT1G62980, AT4G38210, AT4G01630, AT5G56320, AT2G28950, AT2G03090, AT3G60570, AT5G39300, AT3G29030, AT5G39290, AT1G65681, AT2G39700, AT1G65680, AT3G15370, AT3G03220, AT5G39310, AT5G39280
TraesCS1B02G226400	M1	Lipoxygenase [Source:UniProtKB/TrEMBL;Acc:A0A1D5S7U6]	Lipoxygenase	AT1G72520, AT3G22400, AT1G17420, AT3G45140, AT1G67560, AT1G55020
TraesCS1B02G227100	M1	Haloacid dehalogenase-like hydrolase domain-containing protein Sgpp [Source:Projected from Arabidopsis thaliana (AT2G38740) UniProtKB/Swiss-Prot;Acc:Q9ZVJ5]	HAD hydrolase, subfamily IA	AT2G38740
TraesCS1B02G228500	M1		GroES-like superfamily	AT2G44650, AT3G60210
TraesCS1B02G229000	M1	Beta-amylase [Source:UniProtKB/TrEMBL;Acc:A0A1D5S9R7]	Glycoside hydrolase, family 14	AT3G23920, AT4G17090
TraesCS1B02G231400	M1		Alpha/Beta hydrolase fold	AT3G60340, AT5G47330, AT4G17483, AT4G17480, AT4G17470, AT5G47340, AT5G47350
TraesCS1B02G232200	M1		Serine hydroxymethyltransferase	AT4G13930, AT1G36370, AT1G22020, AT4G13890, AT4G32520
TraesCS1B02G234800	M1	GATA transcription factor [Source:UniProtKB/TrEMBL;Acc:A0A1D5SAU4]	Zinc finger, GATA-type	AT3G54810, AT5G26930, AT3G16870, AT3G60530, AT4G36620, AT3G50870, AT2G28340, AT5G66320, AT4G26150, AT4G36240, AT4G16141, AT3G24050, AT5G56860, AT1G08000, AT1G08010, AT4G32890, AT3G45170, AT2G45050, AT3G51080, AT2G18380, AT3G20750, AT5G49300, AT4G34680, AT3G06740, AT5G25830
TraesCS1B02G235800	M1		ALOG domain	AT2G42610, AT4G18610, AT3G23290, AT1G07090, AT1G16910, AT2G31160, AT5G28490, AT3G04510, AT5G58500, AT1G78815
TraesCS1B02G236900	M1		SANT/Myb domain	AT5G17800, AT1G26780, AT4G33450, AT5G67300, AT3G50060, AT1G69560, AT1G17950, AT2G23290, AT3G29020, AT5G39700, AT1G73410, AT3G09230, AT3G55730, AT2G39880, AT4G37260
TraesCS1B02G239200	M1		Metallothionein, family 15, plant	AT3G09390, AT5G02380
TraesCS1B02G240700	M1		PMR5 N-terminal domain	AT5G01360, AT2G38320, AT1G73140, AT2G40320, AT3G11030, AT5G01620
TraesCS1B02G241400	M1		Protein kinase domain	AT5G39000, AT5G28680, AT2G39360, AT5G54380, AT3G46290, AT4G39110, AT3G51550, AT5G59700, AT3G04690, AT2G23200, AT5G24010, AT1G30570, AT5G38990, AT5G61350, AT2G21480
TraesCS1B02G241500	M1			AT3G62650, AT2G47485
TraesCS1B02G243200	M1	Ethylene-responsive transcription factor RAP2-3 [Source:Projected from Arabidopsis thaliana (AT3G16770) UniProtKB/Swiss-Prot;Acc:P42736]	AP2/ERF domain	AT4G23750, AT3G15210, AT4G39780, AT5G43410, AT1G44830, AT2G36450, AT5G61890, AT2G31230, AT5G50080, AT4G34410, AT5G47220, AT2G44940, AT1G22810, AT4G16750, AT2G22200, AT1G71520, AT1G12980, AT1G33760, AT1G06160, AT3G57600, AT2G25820, AT5G18560, AT3G16770, AT4G31060, AT5G25190, AT1G22985, AT3G23230, AT1G24590, AT1G46768, AT5G53290, AT1G36060, AT2G35700, AT1G19210, AT3G14230, AT5G51190, AT1G01250, AT1…
TraesCS1B02G243400	M1		Protein of unknown function DUF538	AT1G02813, AT1G02816, AT4G02370, AT4G02360
TraesCS1B02G244900	M1	Histone H2B [Source:UniProtKB/TrEMBL;Acc:A0A341P2T8]	Histone H2B	AT1G07790, AT5G22880, AT5G02570, AT3G45980, AT5G59910, AT3G09480, AT3G53650, AT3G46030, AT2G28720, AT2G37470
TraesCS1B02G245000	M1	Histone H3.2 [Source:UniProtKB/Swiss-Prot;Acc:P68428]	Histone H3/CENP-A	AT1G19890, AT4G40030, AT4G40040, AT1G75600, AT5G12910, AT5G10400, AT1G01370, AT1G09200, AT5G10980, AT5G10390, AT1G13370, AT5G65350, AT5G65360, AT3G27360
TraesCS1B02G245200	M1	Histone H3.2 [Source:UniProtKB/Swiss-Prot;Acc:P68428]	Histone H3/CENP-A	AT1G19890, AT4G40030, AT4G40040, AT1G75600, AT5G12910, AT5G10400, AT1G01370, AT1G09200, AT5G10980, AT5G10390, AT1G13370, AT5G65350, AT5G65360, AT3G27360
TraesCS1B02G245300	M1	Histone H2B [Source:UniProtKB/TrEMBL;Acc:A0A341P2T8]	Histone H2B	AT1G07790, AT5G22880, AT5G02570, AT3G45980, AT5G59910, AT3G09480, AT3G53650, AT3G46030, AT2G28720, AT2G37470
TraesCS1B02G250900	M1		EF-hand domain	AT5G37770, AT1G73630, AT2G36180, AT1G18210, AT3G03400, AT5G17470, AT1G24620
TraesCS1B02G256100	M1		Glycosyltransferase 61	AT2G41640, AT3G57380
TraesCS1B02G259700	M1		UDP-glucuronosyl/UDP-glucosyltransferase	AT1G07260, AT3G50740, AT4G15280, AT3G16520, AT2G18570, AT3G21760, AT4G15270, AT1G07240, AT1G07250, AT2G29750, AT1G01390, AT1G01420, AT5G26310, AT2G18560, AT4G15260, AT3G21790, AT2G29740, AT3G21780, AT5G66690, AT2G29730, AT4G01070, AT3G21800, AT2G29710, AT3G21750, AT4G36770
TraesCS1B02G260300	M1		Protein kinase domain	AT3G58690, AT1G54820
TraesCS1B02G260900	M1		Cytochrome b-c1 complex subunit 9	AT3G52730
TraesCS1B02G261200	M1		GDSL lipase/esterase	AT5G45910, AT1G28650, AT1G31550, AT1G28580, AT1G28600, AT1G28610, AT1G28590, AT1G28660, AT5G03980, AT1G28670, AT1G28640, AT2G27360, AT1G28570
TraesCS1B02G261800	M1		TPM domain	AT1G54780
TraesCS1B02G265700	M1	Transcription termination factor MTERF4, chloroplastic [Source:Projected from Arabidopsis thaliana (AT4G02990) UniProtKB/Swiss-Prot;Acc:Q9ZT96]	Transcription termination factor, mitochondrial/chloroplastic	AT2G44020, AT4G02990
TraesCS1B02G266500	M1	Similar to 1-deoxy-D-xylulose-5-phosphate synthase [Source: Projected from Oryza sativa (Os05g0408900)]	Transketolase, N-terminal	AT3G21500, AT4G15560, AT5G11380
TraesCS1B02G267800	M1		Glycosyltransferase 61	AT3G18170, AT3G18180
TraesCS1B02G269400	M1	Tubulin beta chain [Source:UniProtKB/TrEMBL;Acc:W5AET6]	Tubulin	AT5G12250, AT1G20010, AT5G62690, AT4G20890, AT2G29550, AT5G44340, AT5G62700, AT1G75780, AT5G23860, AT3G61650, AT5G05620, AT1G50010, AT1G04820, AT4G14960, AT1G64740, AT5G19780, AT5G19770
TraesCS1B02G270000	M1		Heavy metal-associated domain, HMA	AT5G14910
TraesCS1B02G270100	M1	Beta-hexosaminidase [Source:UniProtKB/TrEMBL;Acc:W5A5Z2]	Glycoside hydrolase family 20, catalytic domain	AT1G65590, AT3G55260
TraesCS1B02G272700	M1		Alpha/beta hydrolase fold-1	AT5G38520
TraesCS1B02G273100	M1	Cold shock domain protein 2 [Source:UniProtKB/TrEMBL;Acc:Q75QN9]	Zinc finger, CCHC-type	AT4G38680, AT2G21060, AT2G17870, AT4G36020
TraesCS1B02G273300	M1	MIKC-type MADS-box transcription factor WM27A [Source:UniProtKB/TrEMBL;Acc:A9J215]	Transcription factor, MADS-box	AT2G26320, AT5G20240, AT3G61120, AT1G28450, AT1G47760, AT1G65360, AT5G60910, AT1G28460, AT4G37435, AT1G26310, AT1G54760, AT1G29962, AT5G62165, AT1G31140, AT5G65070, AT3G66656, AT1G71692, AT5G65050, AT2G24840, AT2G42830, AT2G22540, AT3G57230, AT4G09960, AT4G24540, AT2G22630, AT3G04100, AT1G72350, AT5G10140, AT4G37940, AT2G45660, AT5G51860, AT5G13790, AT5G60440, AT5G23260, AT2G03060, AT5G65080, AT4…
TraesCS1B02G277100	M1		Fungal lipase-like domain	AT2G44810, AT2G30550, AT2G31690, AT1G30370, AT1G06800, AT1G51440, AT2G42690, AT4G18550, AT1G06250, AT1G05800
TraesCS1B02G279400	M1		SANT/Myb domain	AT5G57620, AT5G11050, AT5G65230, AT4G26930, AT5G52260, AT4G37780, AT5G61420, AT5G07690, AT5G56110, AT3G48920, AT4G05100, AT3G13890, AT5G40360, AT5G60890, AT1G34670, AT5G55020, AT1G18570, AT2G47460, AT3G61250, AT1G16490, AT3G27920, AT5G14340, AT4G09460, AT5G14750, AT2G32460, AT3G01140, AT1G09540, AT1G57560, AT3G13540, AT1G66390, AT3G28470, AT1G35515, AT3G08500, AT3G47600, AT4G28110, AT3G12820, AT1…
TraesCS1B02G280000	M1		Proton-dependent oligopeptide transporter family	AT1G69870, AT1G69860, AT3G25280, AT3G25260, AT2G26690, AT2G02040, AT1G22550, AT2G37900, AT2G02020, AT5G19640, AT1G18880, AT3G47960, AT1G72120, AT1G27040, AT1G32450, AT3G21670, AT1G68570, AT5G46050, AT1G22540, AT5G46040, AT5G11570, AT5G14940, AT1G72130, AT5G62730, AT3G16180, AT1G72140, AT3G01350, AT3G53960, AT1G69850, AT1G52190, AT3G54450, AT1G62200, AT2G40460, AT5G01180, AT5G62680, AT1G22570, AT3…
TraesCS1B02G280100	M1		Proton-dependent oligopeptide transporter family	AT1G69870, AT1G69860, AT3G25280, AT3G25260, AT2G26690, AT2G02040, AT1G22550, AT2G37900, AT2G02020, AT5G19640, AT1G18880, AT3G47960, AT1G72120, AT1G27040, AT1G32450, AT3G21670, AT1G68570, AT5G46050, AT1G22540, AT5G46040, AT5G11570, AT5G14940, AT1G72130, AT5G62730, AT3G16180, AT1G72140, AT3G01350, AT3G53960, AT1G69850, AT1G52190, AT3G54450, AT1G62200, AT2G40460, AT5G01180, AT5G62680, AT1G22570, AT3…
TraesCS1B02G280600	M1	Bifunctional aspartate aminotransferase and glutamate/aspartate-prephenate aminotransferase [Source:Projected from Arabidopsis thaliana (AT2G22250) UniProtKB/Swiss-Prot;Acc:Q9SIE1]	Aminotransferases, class-I, pyridoxal-phosphate-binding site	AT2G22250
TraesCS1B02G282100	M1		Protein kinase domain	AT4G34500, AT1G56720, AT3G17420, AT3G59110, AT4G01330, AT5G18500, AT1G01540, AT2G42960, AT1G09440, AT4G02630
TraesCS1B02G283300	M1		Inorganic pyrophosphatase	AT3G53620, AT2G46860, AT4G01480, AT2G18230, AT1G01050
TraesCS1B02G283700	M1	Histone H3 [Source:UniProtKB/TrEMBL;Acc:D8L9K7]	Histone H3/CENP-A	AT1G19890, AT4G40030, AT4G40040, AT1G75600, AT5G12910, AT5G10400, AT1G01370, AT1G09200, AT5G10980, AT5G10390, AT1G13370, AT5G65350, AT5G65360, AT3G27360
TraesCS1B02G285500	M1	Ferredoxin [Source:UniProtKB/TrEMBL;Acc:Q8S3J5]	2Fe-2S ferredoxin-type iron-sulfur binding domain	AT1G60950, AT1G10960, AT5G10000, AT2G27510
TraesCS1B02G286800	M1	rRNA N-glycosidase [Source:UniProtKB/TrEMBL;Acc:A0A1D5SH09]	Ribosome-inactivating protein
TraesCS1B02G287300	M1		Amino acid transporter, transmembrane domain	AT5G01240, AT2G38120, AT1G77690, AT2G21050
TraesCS1B02G287400	M1			AT4G28290
TraesCS1B02G288300	M1	phosphate transporter 4;2 [Source:Projected from Arabidopsis thaliana (AT2G38060) TAIR;Acc:AT2G38060]	Major facilitator superfamily	AT3G46980, AT2G38060
TraesCS1B02G288600	M1	LSD1-type zinc finger protein [Source:UniProtKB/TrEMBL;Acc:A5HSI2]	Zinc finger, LSD1-type	AT4G20380, AT1G32540
TraesCS1B02G289200	M1		Zinc finger, RING-CH-type	AT2G34200, AT5G59000, AT5G05830, AT5G01070, AT2G37950
TraesCS1B02G289500	M1			AT5G59050, AT3G54000, AT4G02830
TraesCS1B02G289700	M1		Universal stress protein A family	AT3G53990, AT5G49050, AT3G62550, AT3G11930, AT3G58450, AT3G17020, AT1G09740, AT3G03270, AT2G47710, AT3G25930, AT1G68300
TraesCS1B02G291500	M1		Aldo/keto reductase, conserved site	AT2G37760, AT5G01670, AT2G37770, AT3G53880, AT2G37790, AT5G62420
TraesCS1B02G292200	M1		Phospholipid/glycerol acyltransferase	AT3G11430, AT5G06090, AT2G38110, AT1G06520, AT4G00400, AT1G01610, AT3G11325
TraesCS1B02G293800	M1		FAS1 domain	AT3G46550
TraesCS1B02G296900	M1		Transmembrane protein GPR107/GPR108-like	AT5G42090, AT5G18520, AT5G02630, AT3G09570
TraesCS1B02G297100	M1	Histone H4 [Source:UniProtKB/TrEMBL;Acc:A0A077RYQ1]	Histone H4	AT1G07660, AT5G59970, AT3G46320, AT3G53730, AT3G45930, AT1G07820, AT2G28740, AT5G59690
TraesCS1B02G297200	M1	Histone H4 [Source:UniProtKB/TrEMBL;Acc:A0A077RYQ1]	Histone H4	AT1G07660, AT5G59970, AT3G46320, AT3G53730, AT3G45930, AT1G07820, AT2G28740, AT5G59690
TraesCS1B02G300900	M1	Histone H4 variant TH011 [Source:UniProtKB/Swiss-Prot;Acc:P62785]	Histone H4	AT1G07660, AT5G59970, AT3G46320, AT3G53730, AT3G45930, AT1G07820, AT2G28740, AT5G59690
TraesCS1B02G301000	M1	Histone H4 variant TH011 [Source:UniProtKB/Swiss-Prot;Acc:P62785]	Histone H4	AT1G07660, AT5G59970, AT3G46320, AT3G53730, AT3G45930, AT1G07820, AT2G28740, AT5G59690
TraesCS1B02G301100	M1	Histone H4 [Source:UniProtKB/TrEMBL;Acc:A0A077RYQ1]	Histone H4	AT1G07660, AT5G59970, AT3G46320, AT3G53730, AT3G45930, AT1G07820, AT2G28740, AT5G59690
TraesCS1B02G304700	M1	Histone H4 [Source:UniProtKB/TrEMBL;Acc:A0A077RYQ1]	Histone H4	AT1G07660, AT5G59970, AT3G46320, AT3G53730, AT3G45930, AT1G07820, AT2G28740, AT5G59690
TraesCS1B02G307200	M1	Exocyst subunit Exo70 family protein [Source:UniProtKB/TrEMBL;Acc:A0A1D5SGV9]	Exocyst complex component Exo70	AT5G58430, AT1G07000
TraesCS1B02G308900	M1		Aminotransferase class-III	AT4G39660, AT3G08860, AT2G38400
TraesCS1B02G310100	M1	RING-type E3 ubiquitin transferase [Source:UniProtKB/TrEMBL;Acc:A0A1D6D7Y3]	Armadillo	AT5G01830
TraesCS1B02G310400	M1		Plant lipid transfer protein/Par allergen	AT3G08770, AT2G18370, AT3G51600, AT2G15050, AT2G38530, AT2G15325, AT5G59310, AT4G33355, AT5G59320, AT2G38540, AT5G01870, AT3G51590, AT5G59330
TraesCS1B02G311200	M1	Serine/threonine-protein kinase STN8, chloroplastic [Source:Projected from Arabidopsis thaliana (AT5G01920) UniProtKB/Swiss-Prot;Acc:Q9LZV4]	Protein kinase domain	AT5G01920
TraesCS1B02G311600	M1
TraesCS1B02G311800	M1		Protein kinase domain	AT5G05160, AT2G36570, AT3G08680, AT1G64210, AT5G41680, AT3G17840, AT4G23740, AT2G26730, AT3G02880, AT5G58300, AT1G48480, AT5G53320, AT5G16590
TraesCS1B02G312100	M1		UDP-glucuronosyl/UDP-glucosyltransferase	AT3G16520
TraesCS1B02G315000	M1		BRCT domain	AT1G04020, AT4G21070
TraesCS1B02G315700	M1		Exostosin-like	AT2G32740, AT2G32750, AT1G63450, AT2G31990, AT5G41250, AT2G29040, AT4G13990, AT2G20370
TraesCS1B02G316000	M1
TraesCS1B02G316100	M1			AT5G15260, AT3G01170, AT3G06180, AT5G19025
TraesCS1B02G317200	M1	Centromeric histone 3 [Source:UniProtKB/TrEMBL;Acc:I3NV43]	Histone H3/CENP-A	AT1G19890, AT4G40030, AT4G40040, AT1G75600, AT5G12910, AT5G10400, AT1G01370, AT1G09200, AT5G10980, AT5G10390, AT1G13370, AT5G65350, AT5G65360, AT3G27360
TraesCS1B02G317500	M1	Chlorophyll a-b binding protein, chloroplastic [Source:UniProtKB/TrEMBL;Acc:A0A341P530]	Chlorophyll A-B binding protein, plant	AT2G34420, AT5G54270, AT3G27690, AT1G29930, AT2G05100, AT2G05070, AT1G76570, AT2G34430, AT1G29910, AT4G10340, AT1G29920
TraesCS1B02G319300	M1		EF-hand domain	AT3G03410, AT3G03400, AT2G36180, AT2G15680, AT2G41410, AT3G10190, AT2G43290, AT3G07490, AT4G12860, AT1G18210, AT1G73630, AT1G66400, AT5G37770, AT1G24620, AT1G18530, AT3G25600, AT3G03000, AT1G32250, AT5G37780
TraesCS1B02G320800	M1	Tubulin beta-5 chain [Source:UniProtKB/Swiss-Prot;Acc:Q9ZRA8]	Tubulin	AT5G12250, AT1G20010, AT5G62690, AT4G20890, AT2G29550, AT5G44340, AT5G62700, AT1G75780, AT5G23860
TraesCS1B02G320900	M1		Cyclin, C-terminal domain	AT5G06150, AT4G37490, AT1G34460, AT3G11520, AT2G26760
TraesCS1B02G325100	M1	Phosphoglycerate kinase [Source:UniProtKB/TrEMBL;Acc:A0A1D6RDZ8]	Phosphoglycerate kinase	AT1G79550, AT3G12780, AT1G56190
TraesCS1B02G325700	M1			AT1G16420, AT1G79340, AT1G79310, AT1G79330, AT1G79320, AT5G04200
TraesCS1B02G325800	M1			AT1G16420, AT1G79340, AT1G79310, AT1G79330, AT1G79320, AT5G04200
TraesCS1B02G328000	M1
TraesCS1B02G331900	M1	21.7 kDa class VI heat shock protein [Source:Projected from Arabidopsis thaliana (AT5G54660) UniProtKB/Swiss-Prot;Acc:Q9FIT9]	Alpha crystallin/Hsp20 domain	AT5G54660
TraesCS1B02G332400	M1		GH3 family	AT4G37390, AT5G13370, AT2G47750, AT4G27260, AT5G13320, AT1G28130, AT1G48660, AT2G23170, AT1G23160, AT1G48670, AT2G14960, AT1G48690, AT5G54510, AT5G13360, AT5G51470, AT5G13350, AT1G59500, AT5G13380
TraesCS1B02G332700	M1		NADPH-dependent FMN reductase-like	AT4G27270, AT5G58800, AT4G36750, AT5G54500
TraesCS1B02G334900	M1		GDSL lipase/esterase	AT3G14820, AT1G75900, AT5G63170, AT1G59406, AT1G23500, AT1G20120, AT3G43570, AT1G58525, AT5G42170, AT1G75880, AT1G73610, AT3G43550, AT1G75890, AT1G58725, AT1G59030, AT1G20132
TraesCS1B02G346200	M1		X8 domain	AT5G63230, AT4G13600, AT5G08000, AT3G58100, AT1G79480, AT2G43660, AT5G53600, AT1G29380, AT5G67460, AT4G09467, AT3G28250, AT2G04910, AT5G53610, AT2G42930, AT1G18650, AT1G78520, AT1G13830, AT1G26450, AT2G30933, AT2G43670, AT4G09466, AT2G29735, AT4G09090, AT5G63225, AT1G66852, AT1G69295, AT4G09465, AT5G63250, AT4G09462, AT5G61130, AT1G09460, AT4G05430, AT1G66870, AT5G35740, AT5G63240, AT1G66855, AT2…
TraesCS1B02G347400	M1		Zinc finger, Dof-type	AT3G61850, AT3G55370, AT3G52440, AT2G37590, AT2G28810, AT4G24060, AT1G29160, AT1G21340, AT5G02460, AT1G51700, AT4G21050, AT1G07640, AT5G39660, AT4G00940, AT3G21270, AT5G65590, AT4G21030, AT1G26790, AT4G38000, AT1G28310, AT3G45610, AT5G62430, AT1G47655, AT2G46590, AT5G66940, AT1G69570, AT2G28510, AT5G60850, AT5G62940, AT1G64620, AT5G60200, AT3G50410, AT2G34140, AT4G21040, AT4G21080, AT3G47500
TraesCS1B02G347900	M1	Auxin response factor [Source:UniProtKB/TrEMBL;Acc:A0A1D6D994]	B3 DNA binding domain	AT2G33860, AT5G60450
TraesCS1B02G350300	M1
TraesCS1B02G351200	M1		VQ	AT2G33780, AT3G15300, AT5G53830, AT5G08480, AT1G80450, AT1G28280
TraesCS1B02G352000	M1		Protein of unknown function PDDEXK-like	AT1G12030, AT1G62420, AT3G22970, AT3G25240, AT2G20670, AT1G77145, AT2G38820, AT4G14620, AT2G39650, AT1G77160, AT3G07350, AT4G32480, AT3G54550
TraesCS1B02G353400	M1		DNA polymerase delta, subunit 4	AT1G09815
TraesCS1B02G354000	M1	BAHD acyltransferase DCR [Source:Projected from Arabidopsis thaliana (AT5G23940) UniProtKB/Swiss-Prot;Acc:Q9FF86]	Transferase	AT5G23940
TraesCS1B02G354100	M1		Zinc finger, RING-type	AT2G38195, AT4G24204, AT5G01450, AT2G38220, AT2G38185
TraesCS1B02G355700	M1		Protein kinase domain	AT5G25930
TraesCS1B02G357400	M1	Histone H2A [Source:UniProtKB/TrEMBL;Acc:A0A1D5SBG8]	Histone H2A	AT1G54690, AT4G27230, AT3G20670, AT1G51060, AT5G27670, AT5G59870, AT5G54640, AT1G08880, AT5G02560
TraesCS1B02G360500	M1		Photosystem I assembly factor PSA3	AT3G55250
TraesCS1B02G361000	M1		Zinc finger, RING-type	AT4G17245, AT2G35910, AT3G61550, AT1G32361, AT4G30370, AT4G10150, AT2G47560, AT2G17450, AT2G46494, AT1G49230, AT4G24015, AT2G42360, AT3G11110, AT2G37580, AT3G19140, AT5G42200, AT5G41440, AT2G44578, AT1G72310, AT1G74410, AT3G28620, AT4G17920, AT1G53820, AT1G20823, AT1G51930, AT2G28920, AT5G46650, AT5G07040, AT5G47610, AT5G01880, AT5G05280, AT4G35480, AT2G42350, AT2G46495, AT1G04360, AT2G34000, AT5…
TraesCS1B02G361400	M1		UDP-glucuronosyl/UDP-glucosyltransferase	AT1G07260, AT3G50740, AT4G15280, AT3G16520, AT2G18570, AT3G21760, AT4G15270, AT1G07240, AT1G07250, AT2G29750, AT1G01390, AT1G01420, AT5G26310, AT2G18560, AT4G15260, AT3G21790, AT2G29740, AT3G21780, AT5G66690, AT2G29730, AT4G01070, AT3G21800, AT2G29710, AT3G21750, AT4G36770
TraesCS1B02G362600	M1		Phytocyanin domain	AT2G25060, AT4G31840, AT4G30590, AT3G20570, AT2G23990, AT5G25090, AT5G57920
TraesCS1B02G365000	M1		Leucine-rich repeat	AT2G42800
TraesCS1B02G365200	M1		Senescence regulator S40	AT3G15040, AT2G34340, AT4G18980, AT4G21930, AT4G04630, AT5G03230, AT1G61930, AT3G45210, AT1G11700, AT4G26950, AT1G29640, AT4G21970, AT2G28400, AT5G60680, AT5G45630
TraesCS1B02G369000	M1		ATP synthase, F0 complex, subunit G, mitochondrial	AT4G26210, AT4G29480, AT2G19680
TraesCS1B02G371600	M1		Rapid ALkalinization Factor	AT4G13950, AT3G16570, AT2G33775, AT1G02900, AT3G23805, AT4G15800, AT1G28270, AT2G20660, AT3G05490
TraesCS1B02G371900	M1		Cytochrome P450	AT2G45510, AT2G45970, AT2G44890, AT2G27690, AT4G00360, AT4G39500, AT3G56630, AT2G21910, AT1G57750, AT1G13140, AT1G47620, AT3G48520, AT5G02900, AT2G23180, AT3G01900, AT1G34540, AT1G65340, AT5G52320, AT4G39480, AT4G32170, AT5G23190, AT3G26125, AT1G01600, AT1G66030, AT5G08250, AT4G39510, AT1G69500, AT5G63450, AT1G24540, AT1G13150, AT5G58860, AT1G63710, AT4G39490
TraesCS1B02G374900	M1		WRKY domain	AT4G30935, AT1G62300, AT5G56270, AT3G01970, AT5G41570, AT5G15130, AT4G04450, AT5G07100, AT4G18170, AT1G18860, AT2G37260, AT1G64000, AT2G25000, AT1G80840, AT1G29860, AT4G26640, AT1G69310, AT4G39410, AT2G04880, AT3G01080, AT2G47260, AT2G21900, AT1G68150, AT4G31800, AT5G49520, AT5G26170, AT2G44745, AT4G01720, AT5G64810, AT2G46130, AT2G38470, AT3G62340, AT2G30250, AT1G13960, AT2G40740, AT4G22070, AT5…
TraesCS1B02G375900	M1	Histone H3.2 [Source:UniProtKB/Swiss-Prot;Acc:P68428]	Histone H3/CENP-A	AT1G19890, AT4G40030, AT4G40040, AT1G75600, AT5G12910, AT5G10400, AT1G01370, AT1G09200, AT5G10980, AT5G10390, AT1G13370, AT5G65350, AT5G65360, AT3G27360
TraesCS1B02G376100	M1	Histone H4 [Source:UniProtKB/TrEMBL;Acc:A0A1D6REC6]	Histone H4	AT1G07660, AT5G59970, AT3G46320, AT3G53730, AT3G45930, AT1G07820, AT2G28740, AT5G59690
TraesCS1B02G376300	M1	Histone H3 [Source:UniProtKB/TrEMBL;Acc:D8L9K7]	Histone H3/CENP-A	AT1G19890, AT4G40030, AT4G40040, AT1G75600, AT5G12910, AT5G10400, AT1G01370, AT1G09200, AT5G10980, AT5G10390, AT1G13370, AT5G65350, AT5G65360, AT3G27360
TraesCS1B02G376400	M1	Histone H4 [Source:UniProtKB/TrEMBL;Acc:A0A077RYQ1]	Histone H4	AT1G07660, AT5G59970, AT3G46320, AT3G53730, AT3G45930, AT1G07820, AT2G28740, AT5G59690
TraesCS1B02G376500	M1	Histone H3 [Source:UniProtKB/TrEMBL;Acc:A0A341P8W3]	Histone H3/CENP-A	AT1G19890, AT4G40030, AT4G40040, AT1G75600, AT5G12910, AT5G10400, AT1G01370, AT1G09200, AT5G10980, AT5G10390, AT1G13370, AT5G65350, AT5G65360, AT3G27360
TraesCS1B02G376600	M1	Histone H4 variant TH011 [Source:UniProtKB/Swiss-Prot;Acc:P62785]	Histone H4	AT1G07660, AT5G59970, AT3G46320, AT3G53730, AT3G45930, AT1G07820, AT2G28740, AT5G59690
TraesCS1B02G376700	M1	Histone H3 [Source:UniProtKB/TrEMBL;Acc:A0A077RTJ8]	Histone H3/CENP-A	AT1G19890, AT4G40030, AT4G40040, AT1G75600, AT5G12910, AT5G10400, AT1G01370, AT1G09200, AT5G10980, AT5G10390, AT1G13370, AT5G65350, AT5G65360, AT3G27360
TraesCS1B02G377900	M1	Uncharacterized protein At4g29660 [Source:Projected from Arabidopsis thaliana (AT4G29660) UniProtKB/Swiss-Prot;Acc:Q94K18]	Uncharacterized protein At4g29660-like	AT4G29660
TraesCS1B02G378400	M1	Histone H3 [Source:UniProtKB/TrEMBL;Acc:A0A077RTJ8]	Histone H3/CENP-A	AT1G19890, AT4G40030, AT4G40040, AT1G75600, AT5G12910, AT5G10400, AT1G01370, AT1G09200, AT5G10980, AT5G10390, AT1G13370, AT5G65350, AT5G65360, AT3G27360
TraesCS1B02G378500	M1	Histone H4 variant TH011 [Source:UniProtKB/Swiss-Prot;Acc:P62785]	Histone H4	AT1G07660, AT5G59970, AT3G46320, AT3G53730, AT3G45930, AT1G07820, AT2G28740, AT5G59690
TraesCS1B02G378600	M1	Histone H3.2 [Source:UniProtKB/Swiss-Prot;Acc:P68428]	Histone H3/CENP-A	AT1G19890, AT4G40030, AT4G40040, AT1G75600, AT5G12910, AT5G10400, AT1G01370, AT1G09200, AT5G10980, AT5G10390, AT1G13370, AT5G65350, AT5G65360, AT3G27360
TraesCS1B02G378700	M1	Histone H3 [Source:UniProtKB/TrEMBL;Acc:A0A077RTJ8]	Histone H3/CENP-A	AT1G19890, AT4G40030, AT4G40040, AT1G75600, AT5G12910, AT5G10400, AT1G01370, AT1G09200, AT5G10980, AT5G10390, AT1G13370, AT5G65350, AT5G65360, AT3G27360
TraesCS1B02G380200	M1	Histone H4 [Source:UniProtKB/TrEMBL;Acc:A0A077RYQ1]	Histone H4	AT1G07660, AT5G59970, AT3G46320, AT3G53730, AT3G45930, AT1G07820, AT2G28740, AT5G59690
TraesCS1B02G382200	M1		Glycoside hydrolase, family 28	AT5G44830, AT3G57510, AT3G07970, AT5G27530, AT4G32380, AT1G70500, AT1G23460, AT5G39910, AT4G35670, AT5G17200, AT3G15720, AT1G80140, AT1G80170, AT2G41850, AT4G32370, AT5G44840
TraesCS1B02G384700	M1		Protein kinase domain	AT3G50310, AT1G05100, AT1G07150, AT4G36950, AT5G67080, AT2G32510, AT5G55090, AT4G26890
TraesCS1B02G384900	M1		Protein kinase domain	AT3G50310, AT1G05100, AT1G07150, AT4G36950, AT5G67080, AT2G32510, AT5G55090, AT4G26890
TraesCS1B02G386200	M1	Histone H2B [Source:UniProtKB/TrEMBL;Acc:W5A7K6]	Histone H2B	AT1G07790, AT5G22880, AT5G02570, AT3G45980, AT5G59910, AT3G09480, AT3G53650, AT3G46030, AT2G28720, AT2G37470
TraesCS1B02G386500	M1	Histone H2B [Source:UniProtKB/TrEMBL;Acc:W5A637]	Histone H2B	AT1G07790, AT5G22880, AT5G02570, AT3G45980, AT5G59910, AT3G09480, AT3G53650, AT3G46030, AT2G28720, AT2G37470
TraesCS1B02G386700	M1	Histone H2B [Source:UniProtKB/TrEMBL;Acc:W5A7K6]	Histone H2B	AT1G07790, AT5G22880, AT5G02570, AT3G45980, AT5G59910, AT3G09480, AT3G53650, AT3G46030, AT2G28720, AT2G37470
TraesCS1B02G388200	M1	Chlorophyll a-b binding protein, chloroplastic [Source:UniProtKB/TrEMBL;Acc:A0A341P7E4]	Chlorophyll A-B binding protein, plant	AT2G34420, AT5G54270, AT3G27690, AT1G29930, AT2G05100, AT2G05070, AT1G76570, AT2G34430, AT1G29910, AT4G10340, AT1G29920
TraesCS1B02G388300	M1	Chlorophyll a-b binding protein, chloroplastic [Source:UniProtKB/TrEMBL;Acc:A0A341PIY9]	Chlorophyll A-B binding protein, plant	AT2G34420, AT5G54270, AT3G27690, AT1G29930, AT2G05100, AT2G05070, AT1G76570, AT2G34430, AT1G29910, AT4G10340, AT1G29920
TraesCS1B02G388400	M1
TraesCS1B02G389900	M1		AP2/ERF domain	AT4G23750, AT3G15210, AT4G39780, AT5G43410, AT1G44830, AT2G36450, AT5G61890, AT2G31230, AT5G50080, AT4G34410, AT5G47220, AT2G44940, AT1G22810, AT4G16750, AT2G22200, AT1G71520, AT1G12980, AT1G33760, AT1G06160, AT3G57600, AT2G25820, AT5G18560, AT3G16770, AT4G31060, AT5G25190, AT1G22985, AT3G23230, AT1G24590, AT1G46768, AT5G53290, AT1G36060, AT2G35700, AT1G19210, AT3G14230, AT5G51190, AT1G01250, AT1…
TraesCS1B02G391900	M1		Serine/threonine dehydratase, pyridoxal-phosphate-binding site	AT4G29840, AT1G72810
TraesCS1B02G395200	M1		Protein of unknown function DUF1639	AT4G17440, AT1G48770, AT3G60410, AT1G25370, AT1G68340, AT3G18295
TraesCS1B02G395400	M1		Major facilitator superfamily	AT4G36790, AT1G78130, AT5G10190, AT2G18590
TraesCS1B02G400300	M1	ATP synthase subunit beta [Source:UniProtKB/TrEMBL;Acc:A0A341P7T5]	ATPase, F1/V1/A1 complex, alpha/beta subunit, nucleotide-binding domain	AT5G08680, AT5G08670, AT5G08690, ATCG00480
TraesCS1B02G401400	M1		Short-chain dehydrogenase/reductase SDR	AT5G18210, AT3G04000, AT4G13180, AT3G03980
TraesCS1B02G403000	M1		Histone chaperone ASF1-like	AT5G38110, AT1G66740
TraesCS1B02G403900	M1
TraesCS1B02G408600	M1	Serine/threonine protein phosphatase 2A regulatory subunit [Source:UniProtKB/TrEMBL;Acc:A0A1D5SGL6]	Protein phosphatase 2A, regulatory B subunit, B56	AT5G03470, AT3G21650, AT3G26030, AT4G15415, AT5G25510, AT3G09880, AT3G26020, AT1G13460, AT3G54930
TraesCS1B02G409000	M1		Pectinesterase inhibitor domain
TraesCS1B02G415100	M1		Membrane attack complex component/perforin (MACPF) domain	AT1G28380, AT4G24290
TraesCS1B02G416600	M1	Histone H2B [Source:UniProtKB/TrEMBL;Acc:A0A341PA77]	Histone H2B	AT1G07790, AT5G22880, AT5G02570, AT3G45980, AT5G59910, AT3G09480, AT3G53650, AT3G46030, AT2G28720, AT2G37470
TraesCS1B02G420100	M1	Photosystem I reaction center subunit VI, chloroplast precursor (PSI- H) (Light-harvesting complex I 11 kDa protein) (GOS5 protein) [Source: Projected from Oryza sativa (Os05g0560000)]	Photosystem I PsaH, reaction centre subunit VI	AT1G52230, AT3G16140
TraesCS1B02G420500	M1			AT3G11100, AT1G54060, AT5G05550, AT3G14180, AT3G58630, AT3G24860, AT2G44730
TraesCS1B02G423600	M1		DnaJ domain	AT5G25530, AT1G10350, AT2G20560, AT1G59725, AT3G47940, AT2G20550, AT3G08910, AT4G28480, AT5G01390
TraesCS1B02G424300	M1		Protein DMP	AT1G09157, AT4G24310, AT5G46090, AT4G18425, AT3G21520, AT5G39650, AT3G21550, AT5G27370, AT3G02430, AT4G28485
TraesCS1B02G424900	M1		FAS1 domain	AT5G03170, AT5G60490, AT2G20520, AT1G03870, AT5G44130
TraesCS1B02G425000	M1		FAS1 domain	AT5G03170, AT5G60490, AT2G20520, AT1G03870, AT5G44130
TraesCS1B02G425700	M1		Ubiquitin-like domain	AT1G23410, AT1G65350, AT4G05050, AT1G11980, AT3G52590, AT3G62250, AT2G35635, AT1G55060, AT1G53950, AT2G36170, AT5G37640, AT3G09790, AT1G31340, AT5G03240, AT2G47110, AT4G02890, AT5G20620, AT4G05320, AT1G53930, AT1G53945
TraesCS1B02G431500	M1		NAD-dependent epimerase/dehydratase	AT5G28840
TraesCS1B02G432400	M1		Cold-regulated 413 protein	AT1G29395, AT1G29390
TraesCS1B02G432500	M1		Protein of unknown function DUF3339	AT5G40960, AT3G27030, AT3G48660, AT3G27027, AT5G40980, AT5G08391, AT3G01950, AT5G63500, AT5G50660, AT5G14110, AT5G50560, AT3G01940
TraesCS1B02G432700	M1	Chlorophyll a-b binding protein, chloroplastic [Source:UniProtKB/TrEMBL;Acc:A0A1D5RS51]	Chlorophyll A-B binding protein, plant	AT2G34420, AT5G54270, AT3G27690, AT1G29930, AT2G05100, AT2G05070, AT1G76570, AT2G34430, AT1G29910, AT4G10340, AT1G29920
TraesCS1B02G433300	M1	Chlorophyll a-b binding protein, chloroplastic [Source:UniProtKB/TrEMBL;Acc:A0A341PBF1]	Chlorophyll A-B binding protein, plant	AT2G34420, AT5G54270, AT3G27690, AT1G29930, AT2G05100, AT2G05070, AT1G76570, AT2G34430, AT1G29910, AT4G10340, AT1G29920
TraesCS1B02G433700	M1		NADH-ubiquinone reductase complex 1 MLRQ subunit	AT3G29970, AT3G48140
TraesCS1B02G434700	M1		SANT/Myb domain	AT4G39250, AT2G21650, AT2G18328, AT4G36570, AT1G19510, AT1G75250
TraesCS1B02G435100	M1		SANT/Myb domain	AT4G39250, AT2G21650, AT2G18328, AT4G36570, AT1G19510, AT1G75250
TraesCS1B02G443800	M1		Transcription factor GRAS	AT1G14920, AT5G17490, AT1G66350, AT2G01570, AT3G03450
TraesCS1B02G451100	M1	Chlorophyll a-b binding protein, chloroplastic [Source:UniProtKB/TrEMBL;Acc:A0A1D5SV65]	Chlorophyll A-B binding protein, plant	AT2G34420, AT5G54270, AT3G27690, AT1G29930, AT2G05100, AT2G05070, AT1G76570, AT2G34430, AT1G29910, AT4G10340, AT1G29920
TraesCS1B02G452800	M1		Peptidase S10, serine carboxypeptidase	AT1G15000
TraesCS1B02G453500	M1		Mitochondrial import receptor subunit TOM7	AT1G64220, AT5G41685
TraesCS1B02G455700	M1			AT2G46150, AT4G23610
TraesCS1B02G456500	M1		Transporter protein SLAC1/Mae1/ Ssu1/TehA	AT5G24030, AT4G27970, AT1G12480
TraesCS1B02G456600	M1		ABI family	AT2G46225
TraesCS1B02G460800	M1
TraesCS1B02G472200	M1		RmlC-like cupin domain superfamily	AT1G18490, AT5G15120, AT5G39890, AT3G58670, AT2G42670
TraesCS1B02G472400	M1
TraesCS1B02G476400	M1		Cytochrome P450	AT5G07990
TraesCS1D02G000400	M1		Protein of unknown function DUF3339	AT5G40960, AT3G27030, AT3G48660, AT3G27027, AT5G40980, AT5G08391, AT3G01950, AT5G63500, AT5G50660, AT5G14110, AT5G50560, AT3G01940
TraesCS1D02G000800	M1	Peptidyl-prolyl cis-trans isomerase [Source:UniProtKB/TrEMBL;Acc:Q6XPZ6]	Cyclophilin-type peptidyl-prolyl cis-trans isomerase domain	AT3G63400, AT2G29960, AT2G15790, AT3G62030, AT4G34870, AT4G38740, AT2G38730, AT3G55920, AT5G58710, AT4G32420, AT3G22920, AT4G34960, AT2G16600, AT5G13120, AT3G56070, AT2G21130
TraesCS1D02G003700	M1		Ribosomal protein L28	AT2G33450
TraesCS1D02G004700	M1	Phospholipid-transporting ATPase [Source:UniProtKB/TrEMBL;Acc:A0A1D5T1I0]	P-type ATPase	AT1G13210, AT1G54280, AT3G27870, AT1G68710, AT1G59820, AT1G17500, AT3G25610, AT1G72700, AT1G26130, AT3G13900
TraesCS1D02G012200	M1		F-box domain	AT2G15640, AT2G23160, AT2G16450, AT2G16220
TraesCS1D02G013300	M1		Small GTPase	AT1G28550, AT3G15060, AT1G06400, AT1G16920, AT2G33870, AT3G07410, AT3G46830, AT1G73640, AT1G05810, AT4G18800, AT1G07410, AT2G43130, AT5G46025, AT5G59150, AT5G60860, AT5G47520, AT1G18200, AT2G31680, AT4G18430, AT5G45750, AT1G09630
TraesCS1D02G017500	M1	Dirigent protein [Source:UniProtKB/TrEMBL;Acc:A0A1D5T1W0]	Dirigent protein	AT5G49040, AT1G65870, AT3G13660, AT2G21100, AT1G58170, AT1G55210, AT2G21110, AT4G38700, AT3G13650, AT3G13662, AT5G42510, AT1G22900, AT3G58090, AT5G42500
TraesCS1D02G020700	M1		Transferase	AT3G29590, AT3G29680, AT5G39090, AT5G39050, AT1G03495, AT3G29690, AT3G29720, AT3G29670, AT5G61160, AT3G29636, AT3G29635, AT1G03940, AT5G39080
TraesCS1D02G027400	M1		Proteinase inhibitor I13, potato inhibitor I	AT5G43570, AT2G38900, AT3G50020, AT5G43580, AT2G38870, AT3G46860
TraesCS1D02G030300	M1		Zinc finger, RING-type	AT3G46620, AT2G39720, AT5G59550
TraesCS1D02G030500	M1		Heat shock protein DnaJ, cysteine-rich domain superfamily	AT5G02160
TraesCS1D02G034600	M1		Glycosyltransferase 61	AT3G10320, AT2G41640, AT3G57380
TraesCS1D02G034800	M1		Metallothionein, family 15, plant
TraesCS1D02G036100	M1
TraesCS1D02G039300	M1		Aromatic amino acid lyase	AT2G37040, AT5G04230, AT3G53260, AT3G10340
TraesCS1D02G039800	M1	Histone H2A [Source:UniProtKB/TrEMBL;Acc:A0A1D6RH60]	Histone H2A	AT1G54690, AT4G27230, AT3G20670, AT1G51060, AT5G27670, AT5G59870, AT5G54640, AT1G08880, AT5G02560
TraesCS1D02G039900	M1	Histone H2A [Source:UniProtKB/TrEMBL;Acc:A0A1D5T4B8]	Histone H2A	AT1G54690, AT4G27230, AT3G20670, AT1G51060, AT5G27670, AT5G59870, AT5G54640, AT1G08880, AT5G02560
TraesCS1D02G041300	M1			AT4G22000
TraesCS1D02G044800	M1		Protein of unknown function DUF1639	AT4G17440, AT1G48770, AT3G60410, AT1G25370, AT1G68340, AT3G18295
TraesCS1D02G045200	M1	7,8-dihydroneopterin aldolase [Source:UniProtKB/TrEMBL;Acc:A0A1D5T4X0]	Dihydroneopterin aldolase	AT3G21730, AT3G11750, AT5G62980
TraesCS1D02G046400	M1		11-S seed storage protein, plant	AT2G28680, AT1G07750
TraesCS1D02G046600	M1		Quinoprotein amine dehydrogenase, beta chain-like	AT1G12855, AT1G13200
TraesCS1D02G052200	M1		Alcohol dehydrogenase, zinc-type, conserved site	AT5G43940, AT1G64710, AT1G77120, AT1G32780, AT5G24760
TraesCS1D02G052900	M1	Defensin [Source:UniProtKB/TrEMBL;Acc:C9E1C1]	Knottin, scorpion toxin-like	AT5G63660, AT2G02100, AT2G02130, AT2G02140, AT2G02120, AT1G61070, AT2G31953, AT2G31957, AT2G02147
TraesCS1D02G053000	M1	Defensin-like protein, Positive regulation of Cd accumulation in rice leaves, Mediation of Cd efflux from cytosol into extracellular spaces via chelatio [Source: Projected from Oryza sativa (Os02g0629800)]	Knottin, scorpion toxin-like	AT2G31953, AT2G31957, AT5G63660, AT2G02147, AT2G02100, AT2G02120, AT2G02140, AT2G02130, AT1G61070
TraesCS1D02G053700	M1
TraesCS1D02G053900	M1		Short transmembrane mitochondrial protein 1	AT4G25225, AT2G35736
TraesCS1D02G055000	M1		Protein of unknown function DUF1639	AT4G17440, AT1G48770, AT3G60410, AT1G25370, AT1G68340, AT3G18295
TraesCS1D02G056500	M1		Glycoside hydrolase family 17	AT4G18340, AT3G15800, AT1G30080, AT1G32860, AT2G27500, AT5G42100, AT2G26600
TraesCS1D02G057300	M1		Inosine/uridine-preferring nucleoside hydrolase domain	AT1G05620, AT2G36310
TraesCS1D02G058300	M1	Glutamyl-tRNA reductase [Source:UniProtKB/TrEMBL;Acc:A0A1D5T5B1]	Tetrapyrrole biosynthesis, glutamyl-tRNA reductase	AT1G58290, AT1G09940, AT2G31250
TraesCS1D02G060500	M1	Patatin [Source:UniProtKB/TrEMBL;Acc:A0A1D5T3S1]	Patatin-like phospholipase domain	AT4G37060, AT4G37050, AT5G43590, AT2G26560, AT4G37070
TraesCS1D02G060600	M1	AZG1 [Source:Projected from Arabidopsis thaliana (AT3G10960) UniProtKB/TrEMBL;Acc:A0A178VPT2]	Xanthine/uracil/vitamin C permease	AT5G50300, AT3G10960
TraesCS1D02G060800	M1		PWWP domain	AT3G54760, AT5G02950, AT3G09670
TraesCS1D02G064500	M1	Glycosyltransferases [Source:UniProtKB/TrEMBL;Acc:A0A1D5T2J7]	Glycosyl transferase, family 43	AT2G37090
TraesCS1D02G067200	M1		Protein kinase domain	AT3G45410, AT3G59740, AT3G59730, AT3G55550, AT2G43700, AT3G45330, AT5G60310, AT1G07460, AT3G45390, AT5G03140, AT5G03350, AT1G53060, AT3G53810, AT5G10530, AT5G60270, AT1G70130, AT5G01540, AT5G65600, AT3G59750, AT2G43690, AT2G29220, AT1G15530, AT3G15356, AT4G02410, AT1G53080, AT3G45440, AT5G59270, AT1G53070, AT5G01560, AT3G53380, AT2G37710, AT2G29250, AT4G02420, AT5G60280, AT1G70110, AT5G55830, AT5…
TraesCS1D02G069300	M1		Tetraspanin/Peripherin	AT4G23410, AT3G12090
TraesCS1D02G069800	M1			AT4G08330
TraesCS1D02G072100	M1		DUF3741-associated sequence motif
TraesCS1D02G072500	M1
TraesCS1D02G072700	M1		Oxoglutarate/iron-dependent dioxygenase	AT3G11180, AT3G55970, AT5G05600, AT2G38240
TraesCS1D02G072900	M1		WRKY domain	AT4G30935, AT1G62300, AT5G56270, AT3G01970, AT5G41570, AT5G15130, AT4G04450, AT5G07100, AT4G18170, AT1G18860, AT2G37260, AT1G64000, AT2G25000, AT1G80840, AT1G29860, AT4G26640, AT1G69310, AT4G39410, AT2G04880, AT3G01080, AT2G47260, AT2G21900, AT1G68150, AT4G31800, AT5G49520, AT5G26170, AT2G44745, AT4G01720, AT5G64810, AT2G46130, AT2G38470, AT3G62340, AT2G30250, AT1G13960, AT2G40740, AT4G22070, AT5…
TraesCS1D02G074600	M1		Acetylornithine/Succinylornithine transaminase family	AT1G80600
TraesCS1D02G075500	M1	Basic region/leucine zipper protein [Source:UniProtKB/TrEMBL;Acc:A9ZPJ2]	Basic-leucine zipper domain	AT5G15830, AT4G37730, AT4G34590, AT1G75390, AT5G49450, AT3G62420, AT2G18160, AT2G22850
TraesCS1D02G079800	M1	Peroxidase [Source:UniProtKB/TrEMBL;Acc:W5AMG0]	Plant peroxidase	AT4G33420
TraesCS1D02G081200	M1		Glutathione S-transferase, N-terminal	AT1G02930, AT2G30870, AT1G49860, AT4G02520, AT5G17220, AT1G02920, AT2G47730, AT1G02950, AT3G03190, AT2G02930, AT3G62760, AT2G30860, AT1G02940
TraesCS1D02G081600	M1	Histone H4 variant TH011 [Source:UniProtKB/Swiss-Prot;Acc:P62785]	Histone H4	AT1G07660, AT5G59970, AT3G46320, AT3G53730, AT3G45930, AT1G07820, AT2G28740, AT5G59690
TraesCS1D02G083300	M1			AT1G31130, AT4G19950, AT5G44860
TraesCS1D02G083400	M1			AT1G31130, AT4G19950, AT5G44860
TraesCS1D02G083900	M1		Proteolipid membrane potential modulator	AT3G05880, AT2G38905, AT4G30650, AT3G05890, AT4G28088, AT1G57550, AT4G30660
TraesCS1D02G084200	M1	Helix-loop-helix DNA-binding domain containing protein [Source: Projected from Oryza sativa (Os05g0139100)]	Myc-type, basic helix-loop-helix (bHLH) domain	AT4G28800, AT1G09530, AT5G67110, AT2G20180, AT4G36930, AT2G46970, AT4G28815, AT5G61270, AT3G59060, AT3G62090, AT2G43010, AT1G02340, AT4G28811, AT1G68240, AT4G00050
TraesCS1D02G085100	M1
TraesCS1D02G085900	M1		Phosphoglycerate/bisphosphoglycerate mutase, active site	AT3G05170, AT1G08940
TraesCS1D02G087300	M1		Oxoglutarate/iron-dependent dioxygenase	AT2G25450, AT1G06650, AT2G30830, AT5G59540, AT5G43450, AT1G04380, AT1G04350, AT2G30840, AT1G06640, AT1G03400, AT5G59530, AT3G61400, AT1G06620, AT1G06645, AT1G03410, AT5G43440
TraesCS1D02G089900	M1		Transferase	AT5G48930
TraesCS1D02G092900	M1		F-box-like domain superfamily
TraesCS1D02G098000	M1		Oxoglutarate/iron-dependent dioxygenase	AT1G77330
TraesCS1D02G098300	M1		Glycosyl transferase CAP10 domain	AT1G63420, AT2G45840, AT3G61270, AT5G23850, AT3G61280, AT2G45830, AT1G07220, AT3G61290, AT3G48980
TraesCS1D02G100900	M1		Protein kinase domain	AT1G67580
TraesCS1D02G102400	M1		Rubber elongation factor	AT2G47780, AT1G67360, AT3G05500
TraesCS1D02G103200	M1		Fungal lipase-like domain	AT1G45201, AT5G67050, AT3G14360, AT5G42930, AT1G56630
TraesCS1D02G105400	M1		Zinc finger, PHD-type
TraesCS1D02G108200	M1		RNA polymerase Rpb7-like , N-terminal	AT4G14660, AT4G14520, AT3G22900
TraesCS1D02G109100	M1		GDSL lipase/esterase	AT1G56670, AT1G09390
TraesCS1D02G111600	M1		FAS1 domain	AT5G03170, AT5G60490, AT2G20520, AT1G03870, AT5G44130
TraesCS1D02G113200	M1			AT1G06930, AT3G56260, AT5G01790
TraesCS1D02G113600	M1			AT3G51610
TraesCS1D02G114500	M1		Arabinogalactan protein 16/20/22/41	AT3G61640, AT5G24105, AT2G46330, AT5G53250
TraesCS1D02G115800	M1
TraesCS1D02G116000	M1		Leucine-rich repeat
TraesCS1D02G117900	M1		PAM2-containing protein CID1/CID2	AT4G14270, AT2G41430
TraesCS1D02G118100	M1			AT3G15630, AT1G52720
TraesCS1D02G118600	M1		Bicarbonate transporter, eukaryotic	AT1G74810, AT1G15460, AT4G32510, AT5G25430, AT2G47160, AT3G62270, AT3G06450
TraesCS1D02G118800	M1	Glycosyltransferase [Source:UniProtKB/TrEMBL;Acc:W5ALM8]	UDP-glucuronosyl/UDP-glucosyltransferase	AT4G34135, AT3G53150, AT2G36790, AT4G34131, AT2G36750, AT2G15480, AT2G36760, AT2G36800, AT2G15490, AT2G36780, AT4G34138, AT2G36770, AT3G53160
TraesCS1D02G120500	M1		Leucine-rich repeat	AT1G49490, AT3G24480, AT2G15880, AT4G18670, AT4G28380, AT1G62440, AT4G13340, AT3G19020, AT5G25550, AT1G12040, AT3G22800, AT4G33970
TraesCS1D02G120700	M1		Zf-FLZ domain	AT1G79970, AT2G25690, AT5G11460
TraesCS1D02G120900	M1			AT5G25570
TraesCS1D02G122600	M1
TraesCS1D02G123400	M1		Malic oxidoreductase	AT5G11670, AT1G79750, AT5G25880, AT2G19900
TraesCS1D02G123900	M1	Derlin [Source:UniProtKB/TrEMBL;Acc:A0A341PGZ8]	Derlin	AT4G21810, AT4G04860, AT4G29330
TraesCS1D02G125800	M1		EF-hand domain	AT5G37770, AT1G73630, AT2G36180, AT1G18210, AT3G03400, AT5G17470, AT1G24620, AT1G66400
TraesCS1D02G127800	M1		Late embryogenesis abundant protein, LEA_2 subgroup	AT1G17620, AT5G11890
TraesCS1D02G129200	M1		Mitochondrial substrate/solute carrier	AT5G19760
TraesCS1D02G130200	M1	Peroxidase [Source:UniProtKB/TrEMBL;Acc:W5ANF5]	Plant peroxidase	AT1G71695
TraesCS1D02G130900	M1		Leucine-rich repeat	AT2G19780, AT4G29240, AT1G62440, AT1G12040
TraesCS1D02G136900	M1		Small GTPase	AT5G47960, AT5G65270, AT3G12160, AT4G39990
TraesCS1D02G139400	M1		Heavy metal-associated domain, HMA	AT2G36950, AT5G03380, AT2G28090, AT5G60800
TraesCS1D02G140100	M1			AT4G01110, AT2G30505, AT1G01453, AT2G46300
TraesCS1D02G141700	M1		GDP-fucose protein O-fucosyltransferase	AT2G04280, AT4G12700, AT4G08810
TraesCS1D02G144200	M1		GDSL lipase/esterase	AT3G04290, AT5G18430, AT4G28780, AT5G33370
TraesCS1D02G146100	M1	Ribosomal protein L17 [Source:UniProtKB/TrEMBL;Acc:Q5I7K4]	Ribosomal protein L14P	AT3G04400, AT2G33370, AT1G04480
TraesCS1D02G147900	M1		Fatty acid hydroxylase	AT2G37700, AT1G02190, AT1G02205
TraesCS1D02G148900	M1	3-ketoacyl-CoA synthase [Source:UniProtKB/TrEMBL;Acc:A0A1D5SQ27]	Very-long-chain 3-ketoacyl-CoA synthase	AT2G28630, AT4G34510, AT3G10280, AT2G16280, AT2G15090, AT1G25450, AT2G26250, AT5G49070, AT5G04530, AT1G01120, AT5G43760, AT1G71160, AT2G46720, AT1G07720, AT2G26640, AT1G68530, AT3G52160, AT4G34250, AT1G19440, AT4G34520, AT1G04220
TraesCS1D02G149300	M1			AT4G13690
TraesCS1D02G150000	M1	Long-chain-alcohol oxidase [Source:UniProtKB/TrEMBL;Acc:A0A1D5SWL2]	Glucose-methanol-choline oxidoreductase, N-terminal	AT1G03990, AT4G28570, AT4G19380, AT3G23410
TraesCS1D02G154900	M1		Sugar phosphate transporter domain	AT2G28315, AT2G30460, AT1G06890
TraesCS1D02G155300	M1	Double-stranded RNA-binding protein 2 [Source:Projected from Arabidopsis thaliana (AT2G28380) UniProtKB/Swiss-Prot;Acc:Q9SKN2]	Double-stranded RNA-binding domain	AT3G26932, AT5G41070, AT3G62800, AT2G28380
TraesCS1D02G157700	M1		Domain of unknown function DUF1618
TraesCS1D02G162300	M1		Nucleotide-diphospho-sugar transferases	AT1G64980
TraesCS1D02G162600	M1	YABBY family transcription factor, Leaf developmen [Source: Projected from Oryza sativa (Os10g0508300)]	YABBY protein	AT4G00180, AT2G45190
TraesCS1D02G163900	M1		Bifunctional inhibitor/plant lipid transfer protein/seed storage helical domain	AT1G07747, AT1G66850, AT5G38195, AT1G43665, AT5G38170, AT1G73780, AT2G14846, AT1G43667, AT4G12825, AT3G18280, AT5G38197, AT1G43666, AT3G57310, AT5G38180, AT5G38160, AT1G48750
TraesCS1D02G164000	M1		Bifunctional inhibitor/plant lipid transfer protein/seed storage helical domain	AT1G07747, AT1G66850, AT5G38195, AT1G43665, AT5G38170, AT1G73780, AT2G14846, AT1G43667, AT4G12825, AT3G18280, AT5G38197, AT1G43666, AT3G57310, AT5G38180, AT5G38160, AT1G48750
TraesCS1D02G167600	M1		CBS domain	AT5G53750, AT4G27460
TraesCS1D02G167800	M1		Calponin homology domain	AT5G62500, AT3G47690, AT5G67270
TraesCS1D02G168700	M1	NADPH-protochlorophyllide oxidoreductase [Source:UniProtKB/TrEMBL;Acc:A0A341PKC9]	Short-chain dehydrogenase/reductase SDR	AT4G27440, AT1G03630, AT5G54190
TraesCS1D02G171800	M1		Modifying wall lignin-1/2	AT1G52910, AT4G27435, AT1G61065, AT3G15480, AT1G68220, AT1G13380
TraesCS1D02G172100	M1		Protein of unknown function DUF4750	AT1G36380
TraesCS1D02G173300	M1		Protein of unknown function DUF538	AT1G02813, AT1G02816, AT4G02370, AT4G02360
TraesCS1D02G173800	M1		Late embryogenesis abundant protein, LEA_2 subgroup	AT1G54540, AT5G21130, AT1G65690, AT5G36970, AT2G27080
TraesCS1D02G174700	M1		Ubiquitin-like domain	AT1G23410, AT1G65350, AT4G05050, AT1G11980, AT3G52590, AT3G62250, AT2G35635, AT1G55060, AT1G53950, AT2G36170, AT5G37640, AT3G09790, AT1G31340, AT5G03240, AT2G47110, AT4G02890, AT5G20620, AT4G05320, AT1G53930, AT1G53945
TraesCS1D02G175400	M1		Protein kinase domain	AT1G33260, AT4G10390
TraesCS1D02G176300	M1		RNA-binding, CRM domain	AT4G39040, AT2G21350
TraesCS1D02G176900	M1		Protein kinase domain	AT5G24430, AT3G56760, AT3G50530, AT3G49370, AT1G49580, AT3G19100, AT2G41140, AT2G46700
TraesCS1D02G177000	M1		Small auxin-up RNA	AT3G61900, AT2G46690, AT4G00880, AT5G53590
TraesCS1D02G177400	M1	Similar to actin [Source: Projected from Oryza sativa (Os10g0510000)]	Actin family	AT2G42100, AT2G37620, AT3G46520, AT2G42170, AT5G59370, AT5G09810, AT1G49240, AT2G42090, AT3G12110, AT3G53750, AT3G18780
TraesCS1D02G178300	M1		Protein jagunal	AT5G51510
TraesCS1D02G184600	M1		Protein of unknown function DUF538	AT5G46230, AT1G30020, AT1G09310, AT4G24130, AT1G56580
TraesCS1D02G185500	M1		AAA+ ATPase domain	AT3G28570, AT3G28580, AT5G17730, AT2G46620, AT1G43910, AT5G40010, AT5G17750, AT3G28560, AT3G28540, AT4G25835, AT4G05340, AT4G30250, AT5G17740, AT5G57480, AT2G18193, AT3G28510, AT3G29800, AT5G40000, AT4G05380, AT5G17760, AT3G50930, AT3G50940, AT2G18190, AT3G28610, AT3G28520, AT3G28600
TraesCS1D02G187100	M1		Alpha/beta hydrolase fold-1	AT3G54240, AT1G08310, AT5G22460, AT3G48410, AT1G74300, AT2G36290, AT1G74280, AT3G03240, AT1G74290, AT3G03230, AT3G44510, AT3G09690, AT5G02970
TraesCS1D02G187500	M1	Rhomboid-like protein [Source:UniProtKB/TrEMBL;Acc:M1GLC1]	Peptidase S54, rhomboid	AT2G29050, AT1G12750, AT4G23070, AT3G53780, AT5G07250, AT1G63120, AT1G77860, AT1G52580
TraesCS1D02G189200	M1		Glucose-methanol-choline oxidoreductase, N-terminal	AT3G56060, AT5G51930, AT1G14190, AT1G73050, AT1G12570, AT1G72970, AT1G14185, AT5G51950
TraesCS1D02G189400	M1		Peptidase S8/S53 domain	AT4G10540, AT5G03620, AT5G59110, AT5G59120, AT4G21323, AT5G67360, AT1G66220, AT4G15040, AT5G45650, AT1G20160, AT4G10510, AT2G39850, AT3G46850, AT4G21640, AT3G46840, AT1G04110, AT4G10530, AT5G58830, AT5G59810, AT5G58840, AT5G58820, AT4G10520, AT4G00230, AT5G59090, AT4G26330, AT3G14067, AT1G01900, AT1G32980, AT2G04160, AT5G45640, AT1G32960, AT4G21630, AT5G67090, AT5G59100, AT3G14240, AT2G05920, AT4…
TraesCS1D02G191900	M1	Protein SAR DEFICIENT 4 [Source:Projected from Arabidopsis thaliana (AT5G52810) UniProtKB/Swiss-Prot;Acc:Q9FLY0]	Ornithine cyclodeaminase/mu-crystallin	AT5G52810
TraesCS1D02G194600	M1		Histone H2B	AT1G07790, AT5G22880, AT5G02570, AT3G45980, AT5G59910, AT3G09480, AT3G53650, AT3G46030, AT2G28720, AT2G37470
TraesCS1D02G195400	M1		Mitochondrial substrate/solute carrier	AT2G33820, AT5G46800, AT1G79900
TraesCS1D02G196900	M1		Myc-type, basic helix-loop-helix (bHLH) domain	AT1G32640, AT5G46830, AT5G46760, AT4G17880
TraesCS1D02G197400	M1		Plastid lipid-associated protein/fibrillin conserved domain	AT4G04020, AT4G22240, AT2G35490
TraesCS1D02G197700	M1
TraesCS1D02G197800	M1		Protein SAMBA	AT1G32310
TraesCS1D02G199400	M1			AT3G51230
TraesCS1D02G199800	M1		Methyltransferase type 11	AT1G29790
TraesCS1D02G201100	M1		Proton-dependent oligopeptide transporter family	AT1G69870, AT1G69860, AT3G25280, AT3G25260, AT2G26690, AT2G02040, AT1G22550, AT2G37900, AT2G02020, AT5G19640, AT1G18880, AT3G47960, AT1G72120, AT1G27040, AT1G32450, AT3G21670, AT1G68570, AT5G46050, AT1G22540, AT5G46040, AT5G11570, AT5G14940, AT1G72130, AT5G62730, AT3G16180, AT1G72140, AT3G01350, AT3G53960, AT1G69850, AT1G52190, AT3G54450, AT1G62200, AT2G40460, AT5G01180, AT5G62680, AT1G22570, AT3…
TraesCS1D02G201200	M1		Proton-dependent oligopeptide transporter family	AT1G69870, AT1G69860, AT3G25280, AT3G25260, AT2G26690, AT2G02040, AT1G22550, AT2G37900, AT2G02020, AT5G19640, AT1G18880, AT3G47960, AT1G72120, AT1G27040, AT1G32450, AT3G21670, AT1G68570, AT5G46050, AT1G22540, AT5G46040, AT5G11570, AT5G14940, AT1G72130, AT5G62730, AT3G16180, AT1G72140, AT3G01350, AT3G53960, AT1G69850, AT1G52190, AT3G54450, AT1G62200, AT2G40460, AT5G01180, AT5G62680, AT1G22570, AT3…
TraesCS1D02G201400	M1		Domain of unknown function DUF861, cupin-3	AT2G32650, AT2G32180, AT2G27402
TraesCS1D02G202200	M1			AT4G25030, AT5G45410
TraesCS1D02G202500	M1	CASP-like protein [Source:UniProtKB/TrEMBL;Acc:A0A1D5SY57]	Casparian strip membrane protein domain	AT2G38480
TraesCS1D02G204700	M1	Histone H4 variant TH011 [Source:UniProtKB/Swiss-Prot;Acc:P62785]	Histone H4	AT1G07660, AT5G59970, AT3G46320, AT3G53730, AT3G45930, AT1G07820, AT2G28740, AT5G59690
TraesCS1D02G205300	M1		Zinc finger, RING-type	AT4G17245, AT2G35910, AT3G61550, AT1G32361, AT4G30370, AT4G10150, AT2G47560, AT2G17450, AT2G46494, AT1G49230, AT4G24015, AT2G42360, AT3G11110, AT2G37580, AT3G19140, AT5G42200, AT5G41440, AT2G44578, AT1G72310, AT1G74410, AT3G28620, AT4G17920, AT1G53820, AT1G20823, AT1G51930, AT2G28920, AT5G46650, AT5G07040, AT5G47610, AT5G01880, AT5G05280, AT4G35480, AT2G42350, AT2G46495, AT1G04360, AT2G34000, AT5…
TraesCS1D02G205500	M1	MLO-like protein [Source:UniProtKB/TrEMBL;Acc:A0A1D5SYF9]	Mlo-related protein	AT1G61560, AT1G42560, AT2G17430, AT2G39200, AT3G45290, AT4G24250, AT1G11310, AT1G11000, AT2G33670, AT2G44110, AT5G65970, AT2G17480, AT5G53760, AT1G26700, AT4G02600
TraesCS1D02G206700	M1		Expansin/pollen allergen, DPBB domain	AT3G45960, AT4G38400, AT3G45970
TraesCS1D02G207100	M1		Glycoside hydrolase, family 19, catalytic	AT4G01700, AT1G02360, AT3G12500
TraesCS1D02G208000	M1	Methyltransferase [Source:UniProtKB/TrEMBL;Acc:A0A1D5SZH5]	Methyltransferase type 11	AT1G20330, AT1G76090
TraesCS1D02G208400	M1		Zinc finger, RING-type	AT4G35840, AT5G66070, AT2G17730, AT3G20395
TraesCS1D02G210100	M1		Metallo-beta-lactamase	AT4G33540
TraesCS1D02G212400	M1	Proline dehydrogenase [Source:UniProtKB/TrEMBL;Acc:A0A341PLZ7]	Proline dehydrogenase domain	AT5G38710, AT3G30775
TraesCS1D02G213800	M1		Exostosin-like	AT4G22580
TraesCS1D02G214900	M1		Zinc finger C2H2-type	AT3G60580, AT4G16610, AT1G02030, AT2G45120
TraesCS1D02G215100	M1		Major pollen allergen Lol pI	AT5G05290, AT2G37640, AT5G39260, AT3G55500, AT5G39270, AT2G40610, AT2G20750, AT1G20190, AT1G26770, AT2G45110, AT1G69530, AT1G12560, AT5G02260, AT4G28250, AT1G62980, AT4G38210, AT4G01630, AT5G56320, AT2G28950, AT2G03090, AT3G60570, AT5G39300, AT3G29030, AT5G39290, AT1G65681, AT2G39700, AT1G65680, AT3G15370, AT3G03220, AT5G39310, AT5G39280
TraesCS1D02G215500	M1		Major pollen allergen Lol pI	AT5G05290, AT2G37640, AT5G39260, AT3G55500, AT5G39270, AT2G40610, AT2G20750, AT1G20190, AT1G26770, AT2G45110, AT1G69530, AT1G12560, AT5G02260, AT4G28250, AT1G62980, AT4G38210, AT4G01630, AT5G56320, AT2G28950, AT2G03090, AT3G60570, AT5G39300, AT3G29030, AT5G39290, AT1G65681, AT2G39700, AT1G65680, AT3G15370, AT3G03220, AT5G39310, AT5G39280
TraesCS1D02G215800	M1		Lipoxygenase	AT1G72520, AT3G22400, AT1G17420, AT3G45140, AT1G67560, AT1G55020
TraesCS1D02G216400	M1		HAD hydrolase, subfamily IA	AT2G38740
TraesCS1D02G217600	M1		GroES-like superfamily	AT2G44650, AT3G60210
TraesCS1D02G217800	M1		Zinc finger, RING-type	AT5G47050, AT1G32740, AT4G17680
TraesCS1D02G218500	M1		MADF domain	AT3G24860, AT2G44730, AT3G10030
TraesCS1D02G220100	M1		Protein kinase domain	AT3G44610, AT5G40030, AT1G53700, AT3G12690, AT5G47750, AT2G44830, AT5G55910, AT3G52890, AT5G03640, AT2G36350, AT4G26610, AT3G27580, AT1G16440, AT1G79250, AT3G14370, AT2G26700, AT2G34650, AT5G58140
TraesCS1D02G220400	M1	Serine hydroxymethyltransferase [Source:UniProtKB/TrEMBL;Acc:A0A1D5SQ20]	Serine hydroxymethyltransferase	AT4G13930, AT1G36370, AT1G22020, AT4G13890, AT4G32520
TraesCS1D02G223400	M1			AT2G40095, AT3G55880
TraesCS1D02G224800	M1	SAGA-associated factor 11 [Source:UniProtKB/TrEMBL;Acc:A0A1D5STJ7]	SAGA complex, Sgf11 subunit	AT5G58575
TraesCS1D02G225200	M1		SANT/Myb domain	AT5G17800, AT1G26780, AT4G33450, AT5G67300, AT3G50060, AT1G69560, AT1G17950, AT2G23290, AT3G29020, AT5G39700, AT1G73410, AT3G09230, AT3G55730, AT2G39880, AT4G37260
TraesCS1D02G229000	M1			AT3G62650, AT2G47485
TraesCS1D02G230900	M1	Ethylene-responsive transcription factor RAP2-3 [Source:Projected from Arabidopsis thaliana (AT3G16770) UniProtKB/Swiss-Prot;Acc:P42736]	AP2/ERF domain	AT4G23750, AT3G15210, AT4G39780, AT5G43410, AT1G44830, AT2G36450, AT5G61890, AT2G31230, AT5G50080, AT4G34410, AT5G47220, AT2G44940, AT1G22810, AT4G16750, AT2G22200, AT1G71520, AT1G12980, AT1G33760, AT1G06160, AT3G57600, AT2G25820, AT5G18560, AT3G16770, AT4G31060, AT5G25190, AT1G22985, AT3G23230, AT1G24590, AT1G46768, AT5G53290, AT1G36060, AT2G35700, AT1G19210, AT3G14230, AT5G51190, AT1G01250, AT1…
TraesCS1D02G233200	M1	Histone H3 [Source:UniProtKB/TrEMBL;Acc:A0A077RTJ8]	Histone H3/CENP-A	AT1G19890, AT4G40030, AT4G40040, AT1G75600, AT5G12910, AT5G10400, AT1G01370, AT1G09200, AT5G10980, AT5G10390, AT1G13370, AT5G65350, AT5G65360, AT3G27360
TraesCS1D02G233300	M1	Histone H2B [Source:UniProtKB/TrEMBL;Acc:A0A341PIY6]	Histone H2B	AT1G07790, AT5G22880, AT5G02570, AT3G45980, AT5G59910, AT3G09480, AT3G53650, AT3G46030, AT2G28720, AT2G37470
TraesCS1D02G238100	M1		Alliinase, C-terminal	AT1G34040, AT4G24670, AT1G70560, AT1G23320, AT1G34060
TraesCS1D02G238200	M1	Acyl carrier protein [Source:UniProtKB/TrEMBL;Acc:A0A1D5SQT6]	Acyl carrier protein (ACP)	AT2G44620, AT1G65290
TraesCS1D02G239000	M1		EF-hand domain	AT5G37770, AT1G73630, AT2G36180, AT1G18210, AT3G03400, AT5G17470, AT1G24620
TraesCS1D02G239900	M1	Annexin [Source:UniProtKB/TrEMBL;Acc:A0A1D5SRH3]	Annexin	AT5G65020, AT5G10230, AT1G68090, AT1G35720, AT5G10220, AT5G12380, AT2G38760
TraesCS1D02G245900	M1		Argininosuccinate synthase	AT4G24830
TraesCS1D02G248500	M1		UDP-glucuronosyl/UDP-glucosyltransferase	AT1G07260, AT3G50740, AT4G15280, AT3G16520, AT2G18570, AT3G21760, AT4G15270, AT1G07240, AT1G07250, AT2G29750, AT1G01390, AT1G01420, AT5G26310, AT2G18560, AT4G15260, AT3G21790, AT2G29740, AT3G21780, AT5G66690, AT2G29730, AT4G01070, AT3G21800, AT2G29710, AT3G21750, AT4G36770
TraesCS1D02G249000	M1		Protein kinase domain	AT3G58690, AT1G54820
TraesCS1D02G249900	M1		Cytochrome b-c1 complex subunit 9	AT3G52730
TraesCS1D02G251400	M1		Protein of unknown function DUF594	AT5G45480, AT5G45460, AT5G45540, AT4G19090, AT5G45470, AT4G19080, AT5G45530
TraesCS1D02G251700	M1		Aspartic peptidase A1 family	AT5G19100, AT1G03220, AT5G19120, AT1G03230, AT5G48430, AT5G19110
TraesCS1D02G252100	M1		Peptide methionine sulphoxide reductase MrsB	AT4G04830, AT4G21840, AT4G04810, AT4G21850, AT1G53670, AT4G21860, AT4G04840, AT4G04800, AT4G21830
TraesCS1D02G254500	M1	GID1 protein [Source:UniProtKB/TrEMBL;Acc:I7HZD6]	Alpha/beta hydrolase fold-3	AT3G05120, AT5G27320, AT3G63010
TraesCS1D02G255100	M1	Similar to 1-deoxy-D-xylulose-5-phosphate synthase [Source: Projected from Oryza sativa (Os05g0408900)]	Transketolase, N-terminal	AT3G21500, AT4G15560, AT5G11380
TraesCS1D02G256500	M1		AAA+ ATPase domain	AT3G28570, AT3G28580, AT5G17730, AT2G46620, AT1G43910, AT5G40010, AT5G17750, AT3G28560, AT3G28540, AT4G25835, AT4G05340, AT4G30250, AT5G17740, AT5G57480, AT2G18193, AT3G28510, AT3G29800, AT5G40000, AT4G05380, AT5G17760, AT3G50930, AT3G50940, AT2G18190, AT3G28610, AT3G28520, AT3G28600
TraesCS1D02G256600	M1		Glycosyltransferase 61	AT3G18170, AT3G18180
TraesCS1D02G259500	M1		Heavy metal-associated domain, HMA	AT5G14910
TraesCS1D02G259600	M1	Beta-hexosaminidase [Source:UniProtKB/TrEMBL;Acc:A0A1D5SW09]	Glycoside hydrolase family 20, catalytic domain	AT1G65590, AT3G55260
TraesCS1D02G261900	M1	Histone H3 [Source:UniProtKB/TrEMBL;Acc:A0A077RTJ8]	Histone H3/CENP-A	AT1G19890, AT4G40030, AT4G40040, AT1G75600, AT5G12910, AT5G10400, AT1G01370, AT1G09200, AT5G10980, AT5G10390, AT1G13370, AT5G65350, AT5G65360, AT3G27360
TraesCS1D02G262000	M1	Histone H4 variant TH011 [Source:UniProtKB/Swiss-Prot;Acc:P62785]	Histone H4	AT1G07660, AT5G59970, AT3G46320, AT3G53730, AT3G45930, AT1G07820, AT2G28740, AT5G59690
TraesCS1D02G262700	M1		Transcription factor, MADS-box	AT2G26320, AT5G20240, AT3G61120, AT1G28450, AT1G47760, AT1G65360, AT5G60910, AT1G28460, AT4G37435, AT1G26310, AT1G54760, AT1G29962, AT5G62165, AT1G31140, AT5G65070, AT3G66656, AT1G71692, AT5G65050, AT2G24840, AT2G42830, AT2G22540, AT3G57230, AT4G09960, AT4G24540, AT2G22630, AT3G04100, AT1G72350, AT5G10140, AT4G37940, AT2G45660, AT5G51860, AT5G13790, AT5G60440, AT5G23260, AT2G03060, AT5G65080, AT4…
TraesCS1D02G263700	M1		Oxoglutarate/iron-dependent dioxygenase	AT1G44090, AT4G25420, AT1G60980, AT5G07200, AT5G51810
TraesCS1D02G264500	M1		Transcription factor, MADS-box	AT2G26320, AT5G20240, AT3G61120, AT1G28450, AT1G47760, AT1G65360, AT5G60910, AT1G28460, AT4G37435, AT1G26310, AT1G54760, AT1G29962, AT5G62165, AT1G31140, AT5G65070, AT3G66656, AT1G71692, AT5G65050, AT2G24840, AT2G42830, AT2G22540, AT3G57230, AT4G09960, AT4G24540, AT2G22630, AT3G04100, AT1G72350, AT5G10140, AT4G37940, AT2G45660, AT5G51860, AT5G13790, AT5G60440, AT5G23260, AT2G03060, AT5G65080, AT4…
TraesCS1D02G267100	M1		PB1 domain	AT3G26510, AT5G63130, AT5G09620, AT5G49920, AT3G48240, AT1G70640
TraesCS1D02G268500	M1		NmrA-like domain	AT4G13660, AT1G75290, AT4G34540, AT1G32100, AT1G19540, AT1G75300, AT4G39230, AT1G75280
TraesCS1D02G269000	M1		Alpha/beta hydrolase fold-1	AT3G54240, AT1G08310, AT5G22460, AT3G48410, AT1G74300, AT2G36290, AT1G74280, AT3G03240, AT1G74290, AT3G03230, AT3G44510
TraesCS1D02G269600	M1		Proton-dependent oligopeptide transporter family	AT1G69870, AT1G69860, AT3G25280, AT3G25260, AT2G26690, AT2G02040, AT1G22550, AT2G37900, AT2G02020, AT5G19640, AT1G18880, AT3G47960, AT1G72120, AT1G27040, AT1G32450, AT3G21670, AT1G68570, AT5G46050, AT1G22540, AT5G46040, AT5G11570, AT5G14940, AT1G72130, AT5G62730, AT3G16180, AT1G72140, AT3G01350, AT3G53960, AT1G69850, AT1G52190, AT3G54450, AT1G62200, AT2G40460, AT5G01180, AT5G62680, AT1G22570, AT3…
TraesCS1D02G269700	M1		Proton-dependent oligopeptide transporter family	AT1G69870, AT1G69860, AT3G25280, AT3G25260, AT2G26690, AT2G02040, AT1G22550, AT2G37900, AT2G02020, AT5G19640, AT1G18880, AT3G47960, AT1G72120, AT1G27040, AT1G32450, AT3G21670, AT1G68570, AT5G46050, AT1G22540, AT5G46040, AT5G11570, AT5G14940, AT1G72130, AT5G62730, AT3G16180, AT1G72140, AT3G01350, AT3G53960, AT1G69850, AT1G52190, AT3G54450, AT1G62200, AT2G40460, AT5G01180, AT5G62680, AT1G22570, AT3…
TraesCS1D02G272800	M1		Protein kinase domain	AT4G34500, AT1G56720, AT3G17420, AT3G59110, AT4G01330, AT5G18500, AT1G01540, AT2G42960, AT1G09440, AT4G02630
TraesCS1D02G273500	M1		Inorganic pyrophosphatase	AT3G53620, AT2G46860, AT4G01480, AT2G18230, AT1G01050
TraesCS1D02G273800	M1		Protein kinase domain	AT4G23240, AT4G23230, AT4G11490, AT1G61380, AT4G04490, AT1G61460, AT1G67520, AT1G11280, AT4G23260, AT4G27290, AT4G21400, AT4G23140, AT4G23190, AT4G21410, AT4G23130, AT4G27300, AT4G00970, AT4G11530, AT4G28670, AT1G11330, AT4G11460, AT1G11410, AT4G21366, AT4G05200, AT4G11470, AT1G61490, AT1G61500, AT4G23250, AT1G61420, AT1G11300, AT1G61550, AT2G01780, AT1G70520, AT5G39370, AT3G12000, AT3G45860, AT4…
TraesCS1D02G274300	M1	Histone H3.2 [Source:UniProtKB/Swiss-Prot;Acc:P68428]	Histone H3/CENP-A	AT1G19890, AT4G40030, AT4G40040, AT1G75600, AT5G12910, AT5G10400, AT1G01370, AT1G09200, AT5G10980, AT5G10390, AT1G13370, AT5G65350, AT5G65360, AT3G27360
TraesCS1D02G276600	M1		Cytochrome P450	AT2G45510, AT2G45970, AT2G44890, AT2G27690, AT4G00360, AT4G39500, AT3G56630, AT2G21910, AT1G57750, AT1G13140, AT1G47620, AT3G48520, AT5G02900, AT2G23180, AT3G01900, AT1G34540, AT1G65340, AT5G52320, AT4G39480, AT4G32170, AT5G23190, AT3G26125, AT1G01600, AT1G66030, AT5G08250, AT4G39510, AT1G69500, AT5G63450, AT1G24540, AT1G13150, AT5G58860, AT1G63710, AT4G39490
TraesCS1D02G277700	M1			AT4G28290
TraesCS1D02G277900	M1		HAT (Half-A-TPR) repeat	AT2G29670, AT1G07280, AT3G47080
TraesCS1D02G278500	M1		Protein OCTOPUS-like	AT3G09070, AT5G01170, AT2G38070, AT5G58930, AT3G46990
TraesCS1D02G278800	M1	LSD1-type zinc finger protein [Source:UniProtKB/TrEMBL;Acc:A5HSI2]	Zinc finger, LSD1-type	AT4G20380, AT1G32540
TraesCS1D02G279400	M1		Zinc finger, RING-CH-type	AT2G34200, AT5G59000, AT5G05830, AT5G01070, AT2G37950
TraesCS1D02G279500	M1		Sphingomyelin synthase-like domain	AT2G37940, AT3G54020, AT2G29525
TraesCS1D02G279800	M1		Universal stress protein A family	AT3G53990, AT5G49050, AT3G62550, AT3G11930, AT3G58450, AT3G17020, AT1G09740, AT3G03270, AT2G47710, AT3G25930, AT1G68300
TraesCS1D02G280300	M1		Homeobox domain	AT5G41410, AT4G32980, AT1G75410, AT2G23760, AT2G27220, AT2G35940, AT4G36870, AT1G19700, AT1G75430, AT2G16400, AT2G27990, AT4G34610, AT5G02030
TraesCS1D02G281800	M1		Aldo/keto reductase, conserved site	AT2G37760, AT5G01670, AT2G37770, AT3G53880, AT2G37790, AT5G62420
TraesCS1D02G282300	M1		Phospholipid/glycerol acyltransferase	AT3G11430, AT5G06090, AT2G38110, AT1G06520, AT4G00400, AT1G01610, AT3G11325
TraesCS1D02G283800	M1	60S ribosomal protein L36 [Source:UniProtKB/TrEMBL;Acc:A0A1D5S805]	Ribosomal protein L36e	AT3G53740, AT5G02450, AT2G37600
TraesCS1D02G283900	M1		2S globulin
TraesCS1D02G285500	M1		Transferase	AT5G67160, AT5G42830, AT5G07860, AT3G50290, AT3G50280, AT5G07850, AT3G50270, AT3G50300, AT5G38130, AT5G07870, AT5G67150
TraesCS1D02G286400	M1		Transmembrane protein GPR107/GPR108-like	AT5G42090, AT5G18520, AT5G02630, AT3G09570
TraesCS1D02G286600	M1	Histone H4 [Source:UniProtKB/TrEMBL;Acc:A0A077RYQ1]	Histone H4	AT1G07660, AT5G59970, AT3G46320, AT3G53730, AT3G45930, AT1G07820, AT2G28740, AT5G59690
TraesCS1D02G286700	M1	Histone H4 [Source:UniProtKB/TrEMBL;Acc:A0A077RYQ1]	Histone H4	AT1G07660, AT5G59970, AT3G46320, AT3G53730, AT3G45930, AT1G07820, AT2G28740, AT5G59690
TraesCS1D02G290000	M1	Histone H4 [Source:UniProtKB/TrEMBL;Acc:A0A077RYQ1]	Histone H4	AT1G07660, AT5G59970, AT3G46320, AT3G53730, AT3G45930, AT1G07820, AT2G28740, AT5G59690
TraesCS1D02G290100	M1	Histone H4 [Source:UniProtKB/TrEMBL;Acc:A0A077RYQ1]	Histone H4	AT1G07660, AT5G59970, AT3G46320, AT3G53730, AT3G45930, AT1G07820, AT2G28740, AT5G59690
TraesCS1D02G290200	M1	Histone H4 [Source:UniProtKB/TrEMBL;Acc:A0A077RYQ1]	Histone H4	AT1G07660, AT5G59970, AT3G46320, AT3G53730, AT3G45930, AT1G07820, AT2G28740, AT5G59690
TraesCS1D02G292500	M1		Protein maintenance of PSII under high light 1	AT5G07020
TraesCS1D02G293300	M1	PRA1 family protein [Source:UniProtKB/TrEMBL;Acc:A0A341PXA2]	Prenylated rab acceptor PRA1	AT4G00005, AT5G01640, AT5G07110, AT2G38360, AT5G05380, AT3G56110, AT2G40380
TraesCS1D02G293400	M1	Exocyst subunit Exo70 family protein [Source:UniProtKB/TrEMBL;Acc:A0A1D5SU64]	Exocyst complex component Exo70	AT5G58430, AT1G07000
TraesCS1D02G293600	M1		Polyketide cyclase/dehydrase	AT4G01026, AT1G73000, AT1G01360, AT5G45870, AT5G46790, AT2G40330, AT4G17870, AT4G18620, AT4G27920, AT2G38310, AT2G26040, AT5G53160, AT5G45860, AT5G05440
TraesCS1D02G296000	M1		TRAF-like	AT5G37870
TraesCS1D02G296700	M1		Protein of unknown function DUF761, plant	AT5G57510
TraesCS1D02G298200	M1		Protein of unknown function DUF1677, Oryza sativa
TraesCS1D02G299700	M1	Expansin [Source:UniProtKB/TrEMBL;Acc:A0A1D5SZY2]	Expansin	AT5G05290, AT2G37640, AT5G39260, AT3G55500, AT5G39270, AT2G40610, AT2G20750, AT1G20190, AT1G26770, AT2G45110, AT1G69530, AT1G12560, AT5G02260, AT4G28250, AT1G62980, AT4G38210, AT4G01630, AT5G56320, AT2G28950, AT2G03090, AT3G60570, AT5G39300, AT3G29030, AT5G39290, AT1G65681, AT2G39700, AT1G65680, AT3G15370, AT3G03220, AT5G39310, AT5G39280
TraesCS1D02G301700	M1	Glycosyltransferase [Source:UniProtKB/TrEMBL;Acc:A0A1D5STK8]	UDP-glucuronosyl/UDP-glucosyltransferase	AT3G16520
TraesCS1D02G302500	M1		Cytochrome P450	AT2G26710, AT4G27710, AT3G14690, AT3G14620, AT3G14640, AT5G24900, AT3G14610, AT3G14660, AT5G52400, AT3G14680, AT2G46960, AT5G38450, AT3G14650, AT1G67110, AT1G17060, AT3G14630, AT5G24910, AT1G75130, AT2G46950
TraesCS1D02G303800	M1		Keratinocyte-associated protein 2	AT1G77350
TraesCS1D02G305000	M1
TraesCS1D02G306200	M1	Chlorophyll a-b binding protein, chloroplastic [Source:UniProtKB/TrEMBL;Acc:A0A341PXP0]	Chlorophyll A-B binding protein, plant	AT2G34420, AT5G54270, AT3G27690, AT1G29930, AT2G05100, AT2G05070, AT1G76570, AT2G34430, AT1G29910, AT4G10340, AT1G29920
TraesCS1D02G307200	M1		F-box-like domain superfamily	AT5G46170, AT1G78100, AT1G30200, AT4G18380, AT1G22220
TraesCS1D02G307900	M1			AT3G51510
TraesCS1D02G308300	M1		Leucine-rich repeat	AT5G21090, AT3G43740
TraesCS1D02G308400	M1		Leucine-rich repeat	AT5G21090, AT3G43740
TraesCS1D02G309200	M1	Tubulin beta-5 chain [Source:UniProtKB/Swiss-Prot;Acc:Q9ZRA8]	Tubulin	AT5G12250, AT1G20010, AT5G62690, AT4G20890, AT2G29550, AT5G44340, AT5G62700, AT1G75780, AT5G23860, AT3G61650, AT5G05620, AT1G50010, AT1G04820, AT4G14960, AT1G64740, AT5G19780, AT5G19770
TraesCS1D02G309300	M1		Cyclin, C-terminal domain	AT5G06150, AT4G37490, AT1G34460, AT3G11520, AT2G26760
TraesCS1D02G309400	M1		Cyclin, C-terminal domain	AT5G06150, AT4G37490, AT1G34460, AT3G11520, AT2G26760
TraesCS1D02G309900	M1		Formiminotransferase, N-terminal subdomain	AT2G20830
TraesCS1D02G310000	M1		Cytochrome P450	AT1G74550, AT2G40890, AT1G74540
TraesCS1D02G313800	M1	Phosphoglycerate kinase [Source:UniProtKB/TrEMBL;Acc:A0A341PXW7]	Phosphoglycerate kinase	AT1G79550, AT3G12780, AT1G56190
TraesCS1D02G314800	M1	Ethylene-responsive factor-like transcription factor ERFL2b [Source:UniProtKB/TrEMBL;Acc:A7XA03]	AP2/ERF domain	AT4G23750, AT3G15210, AT4G39780, AT5G43410, AT1G44830, AT2G36450, AT5G61890, AT2G31230, AT5G50080, AT4G34410, AT5G47220, AT2G44940, AT1G22810, AT4G16750, AT2G22200, AT1G71520, AT1G12980, AT1G33760, AT1G06160, AT3G57600, AT2G25820, AT5G18560, AT3G16770, AT4G31060, AT5G25190, AT1G22985, AT3G23230, AT1G24590, AT1G46768, AT5G53290, AT1G36060, AT2G35700, AT1G19210, AT3G14230, AT5G51190, AT1G01250, AT1…
TraesCS1D02G318800	M1	Peroxidase [Source:UniProtKB/TrEMBL;Acc:A0A341PQT0]	Plant peroxidase	AT4G08780, AT4G33420, AT3G21770, AT4G08770, AT5G64110, AT2G38390, AT1G49570, AT1G14550, AT5G66390, AT5G15180, AT5G39580, AT5G06730, AT2G38380, AT2G22420, AT4G36430, AT4G26010, AT1G05260, AT1G44970, AT5G06720, AT2G39040, AT4G16270, AT3G49120, AT5G64100, AT1G71695, AT1G05240, AT3G42570, AT2G43480, AT3G32980, AT1G14540, AT5G51890, AT4G11290, AT1G34510, AT3G03670, AT5G58390, AT5G17820, AT1G68850, AT5…
TraesCS1D02G319000	M1	Glycosyltransferase [Source:UniProtKB/TrEMBL;Acc:A0A1D5SU84]	UDP-glucuronosyl/UDP-glucosyltransferase	AT3G53160, AT2G36760, AT2G36790, AT2G36780, AT2G36800, AT2G36770, AT2G36750
TraesCS1D02G319600	M1		S-adenosyl-L-methionine-dependent methyltransferase	AT2G16030, AT4G26730
TraesCS1D02G320000	M1		GH3 family	AT4G37390, AT5G13370, AT2G47750, AT4G27260, AT5G13320, AT1G28130, AT1G48660, AT2G23170, AT1G23160, AT1G48670, AT2G14960, AT1G48690, AT5G54510, AT5G13360, AT5G51470, AT5G13350, AT1G59500, AT5G13380
TraesCS1D02G320300	M1		NADPH-dependent FMN reductase-like	AT4G27270, AT5G58800, AT4G36750, AT5G54500
TraesCS1D02G320800	M1		Protein kinase domain	AT4G23240, AT4G23230, AT4G11490, AT1G61380, AT4G04490, AT1G61460, AT1G67520, AT1G11280, AT4G23260, AT4G27290, AT4G21400, AT4G23140, AT4G23190, AT4G21410, AT4G23130, AT4G27300, AT4G00970, AT4G11530, AT4G28670, AT1G11330, AT4G11460, AT1G11410, AT4G21366, AT4G05200, AT4G11470, AT1G61490, AT1G61500, AT4G23250, AT1G61420, AT1G11300, AT1G61550, AT2G01780, AT1G70520, AT5G39370, AT3G12000, AT3G45860, AT4…
TraesCS1D02G321300	M1		GDSL lipase/esterase	AT5G45910, AT1G28650, AT1G31550, AT1G28580, AT1G28600, AT1G28610, AT1G28590, AT1G28660, AT5G03980, AT1G28670, AT1G28640, AT2G27360, AT1G28570
TraesCS1D02G322600	M1		GDSL lipase/esterase	AT3G14820, AT1G75900, AT5G63170, AT1G59406, AT1G23500, AT1G20120, AT3G43570, AT1G58525, AT5G42170, AT1G75880, AT1G73610, AT3G43550, AT1G75890, AT1G58725, AT1G59030, AT1G20132
TraesCS1D02G328000	M1		Photosystem II PsbW, class 2	AT2G30570
TraesCS1D02G334800	M1		Protein of unknown function DUF4336	AT3G01060
TraesCS1D02G335200	M1		X8 domain	AT5G63230, AT4G13600, AT5G08000, AT3G58100, AT1G79480, AT2G43660, AT5G53600, AT1G29380, AT5G67460, AT4G09467, AT3G28250, AT2G04910, AT5G53610, AT2G42930, AT1G18650, AT1G78520, AT1G13830, AT1G26450, AT2G30933, AT2G43670, AT4G09466, AT2G29735, AT4G09090, AT5G63225, AT1G66852, AT1G69295, AT4G09465, AT5G63250, AT4G09462, AT5G61130, AT1G09460, AT4G05430, AT1G66870, AT5G35740, AT5G63240, AT1G66855, AT2…
TraesCS1D02G337400	M1	Auxin response factor [Source:UniProtKB/TrEMBL;Acc:A0A1D5SYL7]	B3 DNA binding domain	AT2G33860, AT5G60450
TraesCS1D02G339800	M1
TraesCS1D02G340600	M1		Globin	AT2G16060, AT3G10520
TraesCS1D02G342500	M1		DNA polymerase delta, subunit 4	AT1G09815
TraesCS1D02G342700	M1		Peptidyl-tRNA hydrolase, PTH2	AT4G32900
TraesCS1D02G343400	M1	BAHD acyltransferase DCR [Source:Projected from Arabidopsis thaliana (AT5G23940) UniProtKB/Swiss-Prot;Acc:Q9FF86]	Transferase	AT5G23940
TraesCS1D02G343700	M1		Zinc finger, RING-type	AT2G38195, AT4G24204, AT5G01450, AT2G38220, AT2G38185
TraesCS1D02G350100	M1	Glycosyltransferase [Source:UniProtKB/TrEMBL;Acc:A0A1D5SS61]	UDP-glucuronosyl/UDP-glucosyltransferase	AT1G07260, AT3G50740, AT4G15280, AT3G16520, AT2G18570, AT3G21760, AT4G15270, AT1G07240, AT1G07250, AT2G29750, AT1G01390, AT1G01420, AT5G26310, AT2G18560, AT4G15260, AT3G21790, AT2G29740, AT3G21780, AT5G66690, AT2G29730, AT4G01070, AT3G21800, AT2G29710, AT3G21750, AT4G36770
TraesCS1D02G350800	M1		GINS complex, subunit Psf3	AT3G55490, AT1G19080
TraesCS1D02G353800	M1		Senescence regulator S40
TraesCS1D02G357200	M1		ATP synthase, F0 complex, subunit G, mitochondrial	AT4G26210, AT4G29480, AT2G19680
TraesCS1D02G360000	M1		Rapid ALkalinization Factor	AT4G13950, AT3G16570, AT2G33775, AT1G02900, AT3G23805, AT4G15800, AT1G28270, AT2G20660, AT3G05490
TraesCS1D02G361900	M1		Porin, eukaryotic type	AT3G49920, AT5G37610, AT5G15090, AT5G67500, AT5G57490, AT3G01280
TraesCS1D02G363300	M1	WRKY51 transcriptional factor [Source:UniProtKB/TrEMBL;Acc:A0A0M4CLZ5]	WRKY domain	AT4G30935, AT1G62300, AT5G56270, AT3G01970, AT5G41570, AT5G15130, AT4G04450, AT5G07100, AT4G18170, AT1G18860, AT2G37260, AT1G64000, AT2G25000, AT1G80840, AT1G29860, AT4G26640, AT1G69310, AT4G39410, AT2G04880, AT3G01080, AT2G47260, AT2G21900, AT1G68150, AT4G31800, AT5G49520, AT5G26170, AT2G44745, AT4G01720, AT5G64810, AT2G46130, AT2G38470, AT3G62340, AT2G30250, AT1G13960, AT2G40740, AT4G22070, AT5…
TraesCS1D02G364200	M1	Histone H3 [Source:UniProtKB/TrEMBL;Acc:A0A077RTJ8]	Histone H3/CENP-A	AT1G19890, AT4G40030, AT4G40040, AT1G75600, AT5G12910, AT5G10400, AT1G01370, AT1G09200, AT5G10980, AT5G10390, AT1G13370, AT5G65350, AT5G65360, AT3G27360
TraesCS1D02G364400	M1	Histone H4 variant TH011 [Source:UniProtKB/Swiss-Prot;Acc:P62785]	Histone H4	AT1G07660, AT5G59970, AT3G46320, AT3G53730, AT3G45930, AT1G07820, AT2G28740, AT5G59690
TraesCS1D02G364600	M1	Histone H3 [Source:UniProtKB/TrEMBL;Acc:A0A077RTJ8]	Histone H3/CENP-A	AT1G19890, AT4G40030, AT4G40040, AT1G75600, AT5G12910, AT5G10400, AT1G01370, AT1G09200, AT5G10980, AT5G10390, AT1G13370, AT5G65350, AT5G65360, AT3G27360
TraesCS1D02G364800	M1		Mitochondrial carrier protein	AT5G56450
TraesCS1D02G366300	M1	Histone H2B [Source:UniProtKB/TrEMBL;Acc:A0A0C4BIL4]	Histone H2B	AT1G07790, AT5G22880, AT5G02570, AT3G45980, AT5G59910, AT3G09480, AT3G53650, AT3G46030, AT2G28720, AT2G37470
TraesCS1D02G366400	M1	Histone H3 [Source:UniProtKB/TrEMBL;Acc:A0A077RTJ8]	Histone H3/CENP-A	AT1G19890, AT4G40030, AT4G40040, AT1G75600, AT5G12910, AT5G10400, AT1G01370, AT1G09200, AT5G10980, AT5G10390, AT1G13370, AT5G65350, AT5G65360, AT3G27360
TraesCS1D02G366500	M1	Histone H4 [Source:UniProtKB/TrEMBL;Acc:A0A077RYQ1]	Histone H4	AT1G07660, AT5G59970, AT3G46320, AT3G53730, AT3G45930, AT1G07820, AT2G28740, AT5G59690
TraesCS1D02G366600	M1	Histone H3 [Source:UniProtKB/TrEMBL;Acc:A0A077RTJ8]	Histone H3/CENP-A	AT1G19890, AT4G40030, AT4G40040, AT1G75600, AT5G12910, AT5G10400, AT1G01370, AT1G09200, AT5G10980, AT5G10390, AT1G13370, AT5G65350, AT5G65360, AT3G27360
TraesCS1D02G367000	M1		Protein of unknown function DUF761, plant	AT4G26130, AT5G56980, AT2G26110
TraesCS1D02G367300	M1		IQ motif, EF-hand binding site	AT1G72670, AT2G26180, AT1G17480
TraesCS1D02G368000	M1	Histone H4 [Source:UniProtKB/TrEMBL;Acc:A0A077RYQ1]	Histone H4	AT1G07660, AT5G59970, AT3G46320, AT3G53730, AT3G45930, AT1G07820, AT2G28740, AT5G59690
TraesCS1D02G368500	M1		Arabinogalactan protein 1/3/12/13/14/21
TraesCS1D02G368800	M1			AT2G46540
TraesCS1D02G370100	M1		Protein of unknown function DUF4666	AT1G15400, AT5G20100, AT1G80180
TraesCS1D02G370300	M1		Glycoside hydrolase, family 28	AT5G44830, AT3G57510, AT3G07970, AT5G27530, AT4G32380, AT1G70500, AT1G23460, AT5G39910, AT4G35670, AT5G17200, AT3G15720, AT1G80140, AT1G80170, AT2G41850, AT4G32370, AT5G44840
TraesCS1D02G373900	M1	Histone H2B [Source:UniProtKB/TrEMBL;Acc:W5A7K6]	Histone H2B	AT1G07790, AT5G22880, AT5G02570, AT3G45980, AT5G59910, AT3G09480, AT3G53650, AT3G46030, AT2G28720, AT2G37470
TraesCS1D02G374900	M1	Chlorophyll a-b binding protein, chloroplastic [Source:UniProtKB/TrEMBL;Acc:A0A341PZW9]	Chlorophyll A-B binding protein, plant	AT2G34420, AT5G54270, AT3G27690, AT1G29930, AT2G05100, AT2G05070, AT1G76570, AT2G34430, AT1G29910, AT4G10340, AT1G29920
TraesCS1D02G375000	M1	Chlorophyll a-b binding protein, chloroplastic [Source:UniProtKB/TrEMBL;Acc:A0A1D5SSP2]	Chlorophyll A-B binding protein, plant	AT2G34420, AT5G54270, AT3G27690, AT1G29930, AT2G05100, AT2G05070, AT1G76570, AT2G34430, AT1G29910, AT4G10340, AT1G29920
TraesCS1D02G375100	M1	Chlorophyll a-b binding protein, chloroplastic [Source:UniProtKB/TrEMBL;Acc:A0A341PR15]	Chlorophyll A-B binding protein, plant	AT2G34420, AT5G54270, AT3G27690, AT1G29930, AT2G05100, AT2G05070, AT1G76570, AT2G34430, AT1G29910, AT4G10340, AT1G29920
TraesCS1D02G375500	M1		Methyltransferase type 11	AT3G18000, AT1G73600, AT1G48600
TraesCS1D02G375600	M1		Methyltransferase type 11	AT3G18000, AT1G73600, AT1G48600
TraesCS1D02G376500	M1		AP2/ERF domain	AT4G23750, AT3G15210, AT4G39780, AT5G43410, AT1G44830, AT2G36450, AT5G61890, AT2G31230, AT5G50080, AT4G34410, AT5G47220, AT2G44940, AT1G22810, AT4G16750, AT2G22200, AT1G71520, AT1G12980, AT1G33760, AT1G06160, AT3G57600, AT2G25820, AT5G18560, AT3G16770, AT4G31060, AT5G25190, AT1G22985, AT3G23230, AT1G24590, AT1G46768, AT5G53290, AT1G36060, AT2G35700, AT1G19210, AT3G14230, AT5G51190, AT1G01250, AT1…
TraesCS1D02G378600	M1		Serine/threonine dehydratase, pyridoxal-phosphate-binding site	AT4G29840, AT1G72810
TraesCS1D02G381100	M1		Bifunctional inhibitor/plant lipid transfer protein/seed storage helical domain	AT1G07747, AT1G66850, AT5G38195, AT1G43665, AT5G38170, AT1G73780, AT2G14846, AT1G43667, AT4G12825, AT3G18280, AT5G38197, AT1G43666, AT3G57310, AT5G38180, AT5G38160, AT1G48750
TraesCS1D02G388000	M1		Histone chaperone ASF1-like	AT5G38110, AT1G66740
TraesCS1D02G389100	M1
TraesCS1D02G389200	M1
TraesCS1D02G390400	M1
TraesCS1D02G392100	M1		Protein kinase domain	AT3G45410, AT3G59740, AT3G59730, AT3G55550, AT2G43700, AT3G45330, AT5G60310, AT1G07460, AT3G45390, AT5G03140, AT5G03350, AT1G53060, AT3G53810, AT5G10530, AT5G60270, AT1G70130, AT5G01540, AT5G65600, AT3G59750, AT2G43690, AT2G29220, AT1G15530, AT3G15356, AT4G02410, AT1G53080, AT3G45440, AT5G59270, AT1G53070, AT5G01560, AT3G53380, AT2G37710, AT2G29250, AT4G02420, AT5G60280, AT1G70110, AT5G55830, AT5…
TraesCS1D02G393600	M1		DOMON domain	AT5G35735, AT3G25290, AT4G12980, AT3G61750, AT5G47530, AT3G59070, AT3G07570, AT4G17280, AT5G48750
TraesCS1D02G393900	M1		Purine permease, plant	AT1G30840
TraesCS1D02G394100	M1		Purine permease, plant	AT1G30840
TraesCS1D02G394600	M1		Bile acid:sodium symporter/arsenical resistance protein Acr3	AT1G78560, AT2G26900
TraesCS1D02G394700	M1		Ribosomal protein L37ae	AT3G10950, AT3G60245
TraesCS1D02G395300	M1	Sulfotransferase [Source:UniProtKB/TrEMBL;Acc:A0A341Q0J9]	Sulfotransferase domain	AT1G28170, AT5G07000, AT2G03750, AT2G27570, AT2G03770, AT3G45070, AT1G13420, AT1G74090, AT5G43690, AT1G13430, AT1G18590, AT4G26280, AT3G45080, AT1G74100, AT2G14920, AT3G51210, AT2G03760, AT5G07010
TraesCS1D02G396600	M1	Histone H2B [Source:UniProtKB/TrEMBL;Acc:A0A341PRS4]	Histone H2B	AT1G07790, AT5G22880, AT5G02570, AT3G45980, AT5G59910, AT3G09480, AT3G53650, AT3G46030, AT2G28720, AT2G37470
TraesCS1D02G397300	M1
TraesCS1D02G400100	M1	Photosystem I reaction center subunit VI, chloroplast precursor (PSI- H) (Light-harvesting complex I 11 kDa protein) (GOS5 protein) [Source: Projected from Oryza sativa (Os05g0560000)]	Photosystem I PsaH, reaction centre subunit VI	AT1G52230, AT3G16140
TraesCS1D02G403800	M1		Protein DMP	AT1G09157, AT4G24310, AT5G46090, AT4G18425, AT3G21520, AT5G39650, AT3G21550, AT5G27370, AT3G02430, AT4G28485
TraesCS1D02G404300	M1	Xyloglucan endotransglucosylase/hydrolase [Source:UniProtKB/TrEMBL;Acc:Q56TP4]	Glycoside hydrolase family 16	AT5G57550
TraesCS1D02G404600	M1		FAS1 domain	AT5G03170, AT5G60490, AT2G20520, AT1G03870, AT5G44130
TraesCS1D02G404700	M1		FAS1 domain	AT5G03170, AT5G60490, AT2G20520, AT1G03870, AT5G44130
TraesCS1D02G404800	M1		Glutaredoxin	AT1G28480
TraesCS1D02G405400	M1		Ubiquitin-like domain	AT1G23410, AT1G65350, AT4G05050, AT1G11980, AT3G52590, AT3G62250, AT2G35635, AT1G55060, AT1G53950, AT2G36170, AT5G37640, AT3G09790, AT1G31340, AT5G03240, AT2G47110, AT4G02890, AT5G20620, AT4G05320, AT1G53930, AT1G53945
TraesCS1D02G408300	M1		Uncharacterised protein family Ycf23
TraesCS1D02G411000	M1		Cold-regulated 413 protein	AT1G29395, AT1G29390
TraesCS1D02G411300	M1	Chlorophyll a-b binding protein, chloroplastic [Source:UniProtKB/TrEMBL;Acc:F6K744]	Chlorophyll A-B binding protein, plant	AT2G34420, AT5G54270, AT3G27690, AT1G29930, AT2G05100, AT2G05070, AT1G76570, AT2G34430, AT1G29910, AT4G10340, AT1G29920
TraesCS1D02G411600	M1	Chlorophyll a-b binding protein, chloroplastic [Source:UniProtKB/TrEMBL;Acc:W5AJ04]	Chlorophyll A-B binding protein, plant	AT2G34420, AT5G54270, AT3G27690, AT1G29930, AT2G05100, AT2G05070, AT1G76570, AT2G34430, AT1G29910, AT4G10340, AT1G29920
TraesCS1D02G412000	M1		NADH-ubiquinone reductase complex 1 MLRQ subunit	AT3G29970, AT3G48140
TraesCS1D02G413000	M1		SANT/Myb domain	AT4G39250, AT2G21650, AT2G18328, AT4G36570, AT1G19510, AT1G75250
TraesCS1D02G413600	M1		Sugar/inositol transporter	AT3G05155, AT1G08920, AT1G08900, AT1G08890, AT2G48020, AT1G08930, AT5G27360, AT1G19450, AT4G04760, AT1G54730, AT1G75220, AT5G18840, AT3G05150, AT4G04750, AT3G20460, AT5G27350, AT3G05160, AT3G05165, AT3G05400
TraesCS1D02G415200	M1		Protein of unknown function DUF1645, plant	AT3G27880, AT1G70420, AT1G23710, AT5G62770
TraesCS1D02G416000	M1		PDZ domain	AT3G27925
TraesCS1D02G418900	M1	Ethylene-responsive transcription factor ERF061 [Source:Projected from Arabidopsis thaliana (AT1G64380) UniProtKB/Swiss-Prot;Acc:Q9C7W2]	AP2/ERF domain	AT4G23750, AT3G15210, AT4G39780, AT5G43410, AT1G44830, AT2G36450, AT5G61890, AT2G31230, AT5G50080, AT4G34410, AT5G47220, AT2G44940, AT1G22810, AT4G16750, AT2G22200, AT1G71520, AT1G12980, AT1G33760, AT1G06160, AT3G57600, AT2G25820, AT5G18560, AT3G16770, AT4G31060, AT5G25190, AT1G22985, AT3G23230, AT1G24590, AT1G46768, AT5G53290, AT1G36060, AT2G35700, AT1G19210, AT3G14230, AT5G51190, AT1G01250, AT1…
TraesCS1D02G421100	M1		Amidase	AT5G64440, AT3G25660
TraesCS1D02G421700	M1		Zinc finger, CCCH-type	AT1G66810, AT1G68200
TraesCS1D02G422000	M1
TraesCS1D02G428200	M1	Chlorophyll a-b binding protein, chloroplastic [Source:UniProtKB/TrEMBL;Acc:A0A1D5SV65]	Chlorophyll A-B binding protein, plant	AT2G34420, AT5G54270, AT3G27690, AT1G29930, AT2G05100, AT2G05070, AT1G76570, AT2G34430, AT1G29910, AT4G10340, AT1G29920
TraesCS1D02G429600	M1	Carboxypeptidase [Source:UniProtKB/TrEMBL;Acc:A0A1D5SR02]	Peptidase S10, serine carboxypeptidase	AT1G15000
TraesCS1D02G431900	M1		Cytochrome P450	AT3G26160, AT3G26190, AT3G53280, AT3G26220, AT3G26170, AT1G13110, AT3G26150, AT3G26280, AT3G26180, AT3G26270, AT3G53300, AT3G26200, AT3G26230, AT3G26210, AT1G13080, AT3G44250
TraesCS1D02G432300	M1			AT2G46150, AT4G23610
TraesCS1D02G433300	M1		ABI family	AT2G46225
TraesCS1D02G435900	M1
TraesCS1D02G439300	M1		AAA+ ATPase domain	AT3G28570, AT3G28580, AT5G17730, AT2G46620, AT1G43910, AT5G40010, AT5G17750, AT3G28560, AT3G28540, AT4G25835, AT4G05340, AT4G30250, AT5G17740, AT5G57480, AT2G18193, AT3G28510, AT3G29800, AT5G40000, AT4G05380, AT5G17760, AT3G50930, AT3G50940, AT2G18190, AT3G28610, AT3G28520, AT3G28600
TraesCS1D02G439500	M1		AAA+ ATPase domain	AT3G28570, AT3G28580, AT5G17730, AT2G46620, AT1G43910, AT5G40010, AT5G17750, AT3G28560, AT3G28540, AT4G25835, AT4G05340, AT4G30250, AT5G17740, AT5G57480, AT2G18193, AT3G28510, AT3G29800, AT5G40000, AT4G05380, AT5G17760, AT3G50930, AT3G50940, AT2G18190, AT3G28610, AT3G28520, AT3G28600
TraesCS1D02G443000	M1		Pentatricopeptide repeat	AT2G15690
TraesCS1D02G443100	M1		Protein kinase domain	AT4G34500, AT1G56720, AT3G17420, AT3G59110, AT4G01330, AT5G18500, AT1G01540, AT2G42960, AT1G09440, AT4G02630
TraesCS1D02G443700	M1
TraesCS1D02G443900	M1
TraesCS1D02G444100	M1		Alpha/beta hydrolase fold-1	AT3G24420
TraesCS1D02G449600	M1		Harbinger transposase-derived nuclease domain	AT4G29780, AT5G12010, AT1G72275, AT3G55350, AT3G63270, AT3G19120
TraesCS1D02G450100	M1		Cytochrome P450	AT5G07990
TraesCS1D02G454500	M1		Rho protein GDP-dissociation inhibitor	AT1G62450, AT1G12070, AT3G07880
TraesCS2A02G002800	M1		Cytochrome P450	AT2G45510, AT2G45970, AT2G44890, AT2G27690, AT4G00360, AT4G39500, AT3G56630, AT2G21910, AT1G57750, AT1G13140, AT1G47620, AT3G48520, AT5G02900, AT2G23180, AT3G01900, AT1G34540, AT1G65340, AT5G52320, AT4G39480, AT4G32170, AT5G23190, AT3G26125, AT1G01600, AT1G66030, AT5G08250, AT4G39510, AT1G69500, AT5G63450, AT1G24540, AT1G13150, AT5G58860, AT1G63710, AT4G39490
TraesCS2A02G002900	M1		Cytochrome P450	AT2G45510, AT2G45970, AT2G44890, AT2G27690, AT4G00360, AT4G39500, AT3G56630, AT2G21910, AT1G57750, AT1G13140, AT1G47620, AT3G48520, AT5G02900, AT2G23180, AT3G01900, AT1G34540, AT1G65340, AT5G52320, AT4G39480, AT4G32170, AT5G23190, AT3G26125, AT1G01600, AT1G66030, AT5G08250, AT4G39510, AT1G69500, AT5G63450, AT1G24540, AT1G13150, AT5G58860, AT1G63710, AT4G39490
TraesCS2A02G007300	M1			AT5G15320, AT3G01130
TraesCS2A02G007900	M1	Peptidyl-prolyl cis-trans isomerase [Source:UniProtKB/TrEMBL;Acc:A0A341PUY5]	Peptidyl-prolyl cis-trans isomerase, PpiC-type	AT2G18040
TraesCS2A02G010100	M1	Pyruvate dehydrogenase E1 component subunit alpha [Source:UniProtKB/TrEMBL;Acc:A0A1D5TM13]	Dehydrogenase, E1 component	AT1G01090
TraesCS2A02G010200	M1		START domain	AT4G14500, AT1G64720, AT3G23080, AT5G54170
TraesCS2A02G014300	M1		CBS domain
TraesCS2A02G028400	M1		UDP-glucuronosyl/UDP-glucosyltransferase	AT5G05880, AT5G05900, AT1G22370, AT1G22340, AT3G11340, AT2G26480, AT3G46680, AT5G05870, AT5G59590, AT1G78270, AT3G55710, AT2G28080, AT5G59580, AT3G46690, AT2G36970, AT5G05860, AT1G22380, AT3G46670, AT3G46700, AT5G37950, AT1G22400, AT5G38040, AT3G46660, AT1G22360, AT3G46650, AT3G55700, AT5G38010, AT3G46720, AT5G05890
TraesCS2A02G029700	M1		NB-ARC	AT3G14460
TraesCS2A02G033600	M1		Glycoside hydrolase, family 19, catalytic	AT4G01700, AT1G02360, AT3G12500
TraesCS2A02G034800	M1		D-isomer specific 2-hydroxyacid dehydrogenase, catalytic domain	AT5G28310, AT1G79870, AT2G45630, AT1G12550
TraesCS2A02G035000	M1		D-isomer specific 2-hydroxyacid dehydrogenase, catalytic domain	AT5G28310, AT1G79870, AT2G45630, AT1G12550
TraesCS2A02G036100	M1		Pectinesterase inhibitor domain	AT1G70720, AT4G25260, AT5G20740, AT1G23205, AT5G62360, AT3G47380, AT2G47670, AT5G62340, AT1G62770, AT5G62350, AT2G01610, AT4G00080, AT1G14890, AT4G12390, AT3G62820, AT4G25250, AT1G62760, AT5G51520
TraesCS2A02G039700	M1		Nucleotide-diphospho-sugar transferase	AT4G15970, AT5G44820, AT4G19975, AT1G28700, AT2G02061, AT4G19970, AT1G28695, AT1G14590, AT5G40900, AT1G28710
TraesCS2A02G041400	M1		Amidase	AT5G64440
TraesCS2A02G045100	M1	E3 ubiquitin-protein ligase WAV3 [Source:Projected from Arabidopsis thaliana (AT5G49665) UniProtKB/Swiss-Prot;Acc:Q9LTA6]	Zinc finger, RING-type	AT2G22680, AT5G49665, AT5G65683, AT4G37890
TraesCS2A02G046200	M1		NTF2-like domain superfamily	AT1G71480, AT5G41470
TraesCS2A02G052700	M1		FAD linked oxidase, N-terminal	AT5G44440, AT4G20820, AT1G26380, AT1G01980, AT5G44390, AT4G20830, AT1G30740, AT1G30720, AT4G20860, AT4G20800, AT1G34575, AT1G30760, AT1G11770, AT1G30730, AT5G44380, AT1G30710, AT1G26420, AT5G44410, AT5G44400, AT1G26410, AT5G44360, AT1G26390, AT4G20840, AT2G34810, AT1G30700, AT2G34790, AT1G26400
TraesCS2A02G053100	M1		Protein kinase domain	AT1G34300
TraesCS2A02G061800	M1			AT2G21140, AT4G38770
TraesCS2A02G061900	M1			AT2G21140, AT4G38770
TraesCS2A02G062000	M1			AT2G21140, AT4G38770
TraesCS2A02G062100	M1			AT2G21140, AT4G38770
TraesCS2A02G062200	M1			AT2G21140, AT4G38770
TraesCS2A02G062800	M1			AT2G21140, AT4G38770
TraesCS2A02G063000	M1			AT2G21140, AT4G38770
TraesCS2A02G063100	M1			AT2G21140, AT4G38770
TraesCS2A02G064900	M1	Heavy metal-associated isoprenylated protein 1 [Source:UniProtKB/TrEMBL;Acc:W5B397]	Heavy metal-associated domain, HMA	AT4G08570, AT1G29100, AT5G17450, AT4G35060, AT3G56891, AT3G21490, AT4G38580, AT5G66110, AT3G48970, AT4G13380, AT1G06330, AT1G71050, AT4G39700, AT1G22990
TraesCS2A02G065700	M1	Plasma membrane intrinsic protein [Source:UniProtKB/TrEMBL;Acc:A7J2I3]	Major intrinsic protein	AT2G37170, AT3G61430, AT4G23400, AT2G39010, AT5G60660, AT4G00430, AT4G35100, AT3G54820, AT3G53420, AT2G16850, AT2G37180, AT1G01620, AT2G45960
TraesCS2A02G066700	M1	Ribulose bisphosphate carboxylase small chain [Source:UniProtKB/TrEMBL;Acc:A0A1D5TMY6]	Ribulose bisphosphate carboxylase small chain, domain	AT1G67090, AT5G38430, AT5G38410, AT5G38420
TraesCS2A02G066800	M1	Ribulose bisphosphate carboxylase small chain [Source:UniProtKB/TrEMBL;Acc:A0A0U2V4D5]	Ribulose bisphosphate carboxylase small chain, domain	AT1G67090, AT5G38430, AT5G38410, AT5G38420
TraesCS2A02G066900	M1	Ribulose bisphosphate carboxylase small chain [Source:UniProtKB/TrEMBL;Acc:A0A341PXQ3]	Ribulose bisphosphate carboxylase small chain, domain	AT1G67090, AT5G38430, AT5G38410, AT5G38420
TraesCS2A02G067100	M1	Ribulose bisphosphate carboxylase small chain [Source:UniProtKB/TrEMBL;Acc:A0A1D5TMY8]	Ribulose bisphosphate carboxylase small chain, domain	AT1G67090, AT5G38430, AT5G38410, AT5G38420
TraesCS2A02G067200	M1	Ribulose bisphosphate carboxylase small chain [Source:UniProtKB/TrEMBL;Acc:A0A341PTJ8]	Ribulose bisphosphate carboxylase small chain, domain	AT1G67090, AT5G38430, AT5G38410, AT5G38420
TraesCS2A02G067300	M1	Ribulose bisphosphate carboxylase small chain [Source:UniProtKB/TrEMBL;Acc:W5C9Y4]	Ribulose bisphosphate carboxylase small chain, domain	AT1G67090, AT5G38430, AT5G38410, AT5G38420
TraesCS2A02G067400	M1			AT4G02800
TraesCS2A02G069200	M1		Ribosomal protein L30, bacterial-type	AT5G55140
TraesCS2A02G073700	M1		F-box domain	AT1G67390, AT3G60790
TraesCS2A02G076100	M1		Peptidase M20	AT1G51780, AT1G44350, AT5G54140, AT5G56660, AT5G56650, AT1G51760, AT3G02875
TraesCS2A02G077500	M1		B3 DNA binding domain
TraesCS2A02G081400	M1		Protein kinase domain	AT5G18610, AT2G07180, AT1G74490, AT3G24790, AT2G28930, AT1G07570, AT5G13160, AT1G76360, AT2G26290, AT1G61590, AT3G26940, AT5G01020, AT5G15080, AT5G16500, AT4G35600, AT3G07070, AT2G39660, AT4G13190, AT5G02800, AT1G26970, AT2G28590, AT1G69790, AT5G35580, AT2G28940, AT2G39110, AT1G14370, AT3G09830, AT3G20530, AT3G55450, AT4G17660, AT1G72540, AT5G03320, AT1G20650, AT3G01300, AT5G47070, AT3G02810, AT2…
TraesCS2A02G082100	M1	Ascorbate peroxidase, ROS homeostasis, Chloroplast protection, Carbohydrate metabolism, Plant architecture, Fertility maintenanc [Source: Projected from Oryza sativa (Os07g0694700)]	Haem peroxidase	AT3G09640, AT4G35970, AT4G35000, AT1G07890
TraesCS2A02G084800	M1		Fatty acid desaturase domain	AT5G05580, AT2G29980, AT3G11170
TraesCS2A02G086300	M1		Transferase	AT2G40230, AT1G27620
TraesCS2A02G086900	M1		PMR5 N-terminal domain	AT2G40150, AT2G40160, AT3G55990
TraesCS2A02G088500	M1			AT4G31150
TraesCS2A02G089400	M1		Polyketide cyclase/dehydrase	AT4G01026, AT1G73000, AT1G01360, AT5G45870, AT5G46790, AT2G40330, AT4G17870, AT4G18620, AT4G27920, AT2G38310, AT2G26040, AT5G53160, AT5G45860, AT5G05440
TraesCS2A02G090900	M1		Short-chain dehydrogenase/reductase SDR	AT3G42960, AT2G47120, AT3G26760, AT1G52340, AT3G29260, AT4G03140, AT3G51680, AT2G47140, AT3G26770, AT3G29250, AT2G47130, AT2G47150
TraesCS2A02G091000	M1		Short-chain dehydrogenase/reductase SDR	AT3G42960, AT2G47120, AT3G26760, AT1G52340, AT3G29260, AT4G03140, AT3G51680, AT2G47140, AT3G26770, AT3G29250, AT2G47130, AT2G47150
TraesCS2A02G091100	M1		Short-chain dehydrogenase/reductase SDR	AT3G42960, AT2G47120, AT3G26760, AT1G52340, AT3G29260, AT4G03140, AT3G51680, AT2G47140, AT3G26770, AT3G29250, AT2G47130, AT2G47150
TraesCS2A02G091500	M1	Pectate lyase [Source:UniProtKB/TrEMBL;Acc:A0A341PYJ3]	Pectate lyase	AT3G55140, AT3G09540, AT3G07010
TraesCS2A02G095700	M1	Nicotianamine synthase [Source:UniProtKB/TrEMBL;Acc:A0A172Q4F0]	Nicotianamine synthase	AT4G26483, AT5G04950, AT1G09240, AT1G56430, AT5G56080
TraesCS2A02G098100	M1	Calmodulin TaCaM1-1 [Source:UniProtKB/TrEMBL;Acc:Q7DMG9]	EF-hand domain	AT1G66410, AT3G43810, AT3G56800, AT5G21274, AT2G41110, AT4G14640, AT2G41090, AT2G27030, AT5G37780, AT3G22930
TraesCS2A02G098400	M1		Alpha-L-arabinofuranosidase, C-terminal	AT5G26120, AT3G10740
TraesCS2A02G099500	M1		Peptidase S8/S53 domain	AT4G10540, AT5G03620, AT5G59110, AT5G59120, AT4G21323, AT5G67360, AT1G66220, AT4G15040, AT5G45650, AT1G20160, AT4G10510, AT2G39850, AT3G46850, AT4G21640, AT3G46840, AT1G04110, AT4G10530, AT5G58830, AT5G59810, AT5G58840, AT5G58820, AT4G10520, AT4G00230, AT5G59090, AT4G26330, AT3G14067, AT1G01900, AT1G32980, AT2G04160, AT5G45640, AT1G32960, AT4G21630, AT5G67090, AT5G59100, AT3G14240, AT2G05920, AT4…
TraesCS2A02G099700	M1		Peptidase S8/S53 domain	AT4G10540, AT5G03620, AT5G59110, AT5G59120, AT4G21323, AT5G67360, AT1G66220, AT4G15040, AT5G45650, AT1G20160, AT4G10510, AT2G39850, AT3G46850, AT4G21640, AT3G46840, AT1G04110, AT4G10530, AT5G58830, AT5G59810, AT5G58840, AT5G58820, AT4G10520, AT4G00230, AT5G59090, AT4G26330, AT3G14067, AT1G01900, AT1G32980, AT2G04160, AT5G45640, AT1G32960, AT4G21630, AT5G67090, AT5G59100, AT3G14240, AT2G05920, AT4…
TraesCS2A02G099900	M1	Transcription factor, Response to ethylene stimulus, Wound signalin [Source: Projected from Oryza sativa (Os07g0685700)]	Ethylene insensitive 3	AT5G21120, AT2G27050, AT5G65100, AT1G73730, AT3G20770, AT5G10120
TraesCS2A02G100900	M1		Thioredoxin domain	AT5G61440, AT4G29670, AT1G08570, AT4G26160, AT2G33270
TraesCS2A02G101000	M1		NAC domain	AT3G17730, AT4G36160, AT5G04395, AT3G29035, AT1G62700, AT5G24590, AT5G17260, AT5G64060, AT3G61910, AT1G52880, AT3G15510, AT1G32770, AT5G04410, AT4G10350, AT5G13180, AT2G46770, AT5G66300, AT3G04070, AT4G27410, AT1G12260, AT2G27300, AT5G07680, AT5G53950, AT3G10480, AT1G76420, AT2G33480, AT3G49530, AT3G10500, AT3G10490, AT1G79580, AT3G12977, AT1G01720, AT5G18270, AT1G52890, AT2G24430, AT1G54330, AT5…
TraesCS2A02G101100	M1		NAC domain	AT3G17730, AT4G36160, AT5G04395, AT3G29035, AT1G62700, AT5G24590, AT5G17260, AT5G64060, AT3G61910, AT1G52880, AT3G15510, AT1G32770, AT5G04410, AT4G10350, AT5G13180, AT2G46770, AT5G66300, AT3G04070, AT4G27410, AT1G12260, AT2G27300, AT5G07680, AT5G53950, AT3G10480, AT1G76420, AT2G33480, AT3G49530, AT3G10500, AT3G10490, AT1G79580, AT3G12977, AT1G01720, AT5G18270, AT1G52890, AT2G24430, AT1G54330, AT5…
TraesCS2A02G101200	M1		NAC domain	AT3G17730, AT4G36160, AT5G04395, AT3G29035, AT1G62700, AT5G24590, AT5G17260, AT5G64060, AT3G61910, AT1G52880, AT3G15510, AT1G32770, AT5G04410, AT4G10350, AT5G13180, AT2G46770, AT5G66300, AT3G04070, AT4G27410, AT1G12260, AT2G27300, AT5G07680, AT5G53950, AT3G10480, AT1G76420, AT2G33480, AT3G49530, AT3G10500, AT3G10490, AT1G79580, AT3G12977, AT1G01720, AT5G18270, AT1G52890, AT2G24430, AT1G54330, AT5…
TraesCS2A02G101400	M1		NAC domain	AT3G17730, AT4G36160, AT5G04395, AT3G29035, AT1G62700, AT5G24590, AT5G17260, AT5G64060, AT3G61910, AT1G52880, AT3G15510, AT1G32770, AT5G04410, AT4G10350, AT5G13180, AT2G46770, AT5G66300, AT3G04070, AT4G27410, AT1G12260, AT2G27300, AT5G07680, AT5G53950, AT3G10480, AT1G76420, AT2G33480, AT3G49530, AT3G10500, AT3G10490, AT1G79580, AT3G12977, AT1G01720, AT5G18270, AT1G52890, AT2G24430, AT1G54330, AT5…
TraesCS2A02G101700	M1		Ricin B-like lectins	AT2G39050
TraesCS2A02G101800	M1		Ricin B-like lectins	AT2G39050
TraesCS2A02G101900	M1		NAC domain	AT3G17730, AT4G36160, AT5G04395, AT3G29035, AT1G62700, AT5G24590, AT5G17260, AT5G64060, AT3G61910, AT1G52880, AT3G15510, AT1G32770, AT5G04410, AT4G10350, AT5G13180, AT2G46770, AT5G66300, AT3G04070, AT4G27410, AT1G12260, AT2G27300, AT5G07680, AT5G53950, AT3G10480, AT1G76420, AT2G33480, AT3G49530, AT3G10500, AT3G10490, AT1G79580, AT3G12977, AT1G01720, AT5G18270, AT1G52890, AT2G24430, AT1G54330, AT5…
TraesCS2A02G102500	M1		Oxidoreductase FAD/NAD(P)-binding	AT1G15140
TraesCS2A02G103900	M1		Cytochrome P450	AT2G26710, AT4G27710, AT3G14690, AT3G14620, AT3G14640, AT5G24900, AT3G14610, AT3G14660, AT5G52400, AT3G14680, AT2G46960, AT5G38450, AT3G14650, AT1G67110, AT1G17060, AT3G14630, AT5G24910, AT1G75130, AT2G46950
TraesCS2A02G104100	M1		Protein kinase domain	AT5G05160, AT2G36570, AT3G08680, AT1G64210, AT5G41680, AT3G17840, AT4G23740, AT2G26730, AT3G02880, AT5G58300, AT1G48480, AT5G53320, AT5G16590
TraesCS2A02G105400	M1			AT2G40765
TraesCS2A02G109600	M1	Pectinesterase [Source:UniProtKB/TrEMBL;Acc:A0A1D5TNY2]	Pectinesterase, catalytic	AT1G02810, AT5G53370, AT1G11590, AT3G43270, AT2G26440, AT5G04970, AT4G02320, AT3G62170, AT4G03930, AT4G00190, AT1G44980, AT2G47040, AT2G43050, AT4G33230, AT3G06830, AT2G47030, AT3G59010, AT4G15980, AT4G02330, AT5G51490, AT1G53840, AT2G45220, AT4G02300, AT3G14310, AT3G10710, AT5G09760, AT5G04960, AT4G33220, AT3G10720, AT3G60730, AT2G26450, AT3G05610, AT5G49180, AT3G27980, AT5G20860, AT3G47400, AT3…
TraesCS2A02G111000	M1		Hypoxia induced protein, domain	AT5G27760, AT3G05550
TraesCS2A02G111300	M1		Photosystem II PsbX	AT2G06520
TraesCS2A02G111700	M1		Universal stress protein A family	AT3G53990, AT5G49050, AT3G62550, AT3G11930, AT3G58450, AT3G17020, AT1G09740, AT3G03270, AT2G47710, AT3G25930, AT1G68300
TraesCS2A02G112500	M1		Universal stress protein A family	AT3G53990, AT5G49050, AT3G62550, AT3G11930, AT3G58450, AT3G17020, AT1G09740, AT3G03270, AT2G47710, AT3G25930, AT1G68300
TraesCS2A02G114000	M1		Rubber elongation factor	AT2G47780, AT1G67360, AT3G05500
TraesCS2A02G114300	M1	60S ribosome subunit biogenesis protein NIP7 homolog [Source:UniProtKB/TrEMBL;Acc:W5BKZ9]	PUA domain	AT4G15770
TraesCS2A02G114400	M1		Photosystem I reaction centre subunit N, chloroplastic	AT5G64040
TraesCS2A02G117700	M1
TraesCS2A02G129000	M1	E3 ubiquitin-protein ligase [Source:UniProtKB/TrEMBL;Acc:A0A341PXW6]	Zinc finger, RING-type	AT3G58040, AT5G53360, AT3G13672, AT3G61790, AT4G27880, AT2G41980
TraesCS2A02G130900	M1		Aspartic peptidase A1 family	AT4G30040, AT1G79720, AT5G07030, AT4G12920, AT5G24820, AT1G25510, AT3G61820, AT2G28010, AT2G42980, AT3G18490, AT5G10760, AT2G28030, AT1G09750, AT2G03200, AT4G30030, AT3G59080, AT2G23945, AT2G28225, AT3G54400, AT3G20015, AT5G10770, AT1G01300, AT2G28040, AT2G28220
TraesCS2A02G131900	M1
TraesCS2A02G133700	M1	Carboxypeptidase [Source:UniProtKB/TrEMBL;Acc:A0A1D5TM94]	Peptidase S10, serine carboxypeptidase	AT5G23210, AT3G07990, AT4G30810, AT3G63470, AT4G12910, AT3G52020, AT5G09640, AT2G05850, AT2G35770, AT3G02110, AT5G08260, AT2G24010, AT1G11080, AT2G22990, AT4G30610, AT1G73270, AT3G56540, AT1G43780, AT2G22980, AT3G10450, AT5G42240, AT3G52000, AT5G36180, AT2G23010, AT1G73300, AT2G22970, AT3G12203, AT2G23000, AT5G42230, AT2G22960, AT1G73290, AT3G25420, AT1G73310, AT2G12480, AT2G24000, AT1G73280, AT3…
TraesCS2A02G133900	M1		Uncharacterised protein family UPF0114	AT5G13720, AT4G19390
TraesCS2A02G136700	M1			AT2G38000
TraesCS2A02G139100	M1		BRCT domain	AT1G04020, AT4G21070
TraesCS2A02G141600	M1		Endonuclease/exonuclease/phosphatase	AT2G48030, AT3G21530
TraesCS2A02G141900	M1			AT5G19240, AT1G54860, AT3G06035, AT5G19250, AT5G19230
TraesCS2A02G143200	M1		Lipase, GDXG, putative histidine active site	AT5G16080, AT1G47480, AT1G49660, AT1G49650, AT1G49640, AT3G48700, AT2G45600, AT2G45610, AT1G68620, AT1G19190, AT5G23530, AT5G06570, AT5G62180, AT3G48690, AT2G03550
TraesCS2A02G144200	M1	GAMMA CA2 [Source:Projected from Arabidopsis thaliana (AT1G47260) UniProtKB/TrEMBL;Acc:A0A178WI45]	Hexapeptide repeat	AT1G19580, AT1G47260, AT5G66510
TraesCS2A02G146900	M1		NADH dehydrogenase [ubiquinone] (complex I), alpha subcomplex, subunit 6	AT3G12260
TraesCS2A02G152000	M1		Proteolipid membrane potential modulator	AT3G05880, AT2G38905, AT4G30650, AT3G05890, AT4G28088, AT1G57550, AT4G30660
TraesCS2A02G152700	M1		SANT/Myb domain	AT5G57620, AT5G11050, AT5G65230, AT4G26930, AT5G52260, AT4G37780, AT5G61420, AT5G07690, AT5G56110, AT3G48920, AT4G05100, AT3G13890, AT5G40360, AT5G60890, AT1G34670, AT5G55020, AT1G18570, AT2G47460, AT3G61250, AT1G16490, AT3G27920, AT5G14340, AT4G09460, AT5G14750, AT2G32460, AT3G01140, AT1G09540, AT1G57560, AT3G13540, AT1G66390, AT3G28470, AT1G35515, AT3G08500, AT3G47600, AT4G28110, AT3G12820, AT1…
TraesCS2A02G153300	M1		HAD hydrolase, subfamily IA	AT2G32150, AT5G59490, AT5G02230, AT3G62040, AT5G59480
TraesCS2A02G154100	M1		NADH-ubiquinone oxidoreductase, 21kDa subunit, N-terminal	AT4G16450
TraesCS2A02G154500	M1	Anaphase-promoting complex subunit 13 [Source:Projected from Arabidopsis thaliana (AT1G73177) UniProtKB/Swiss-Prot;Acc:Q8L981]	Apc13	AT1G73177
TraesCS2A02G155200	M1		X8 domain	AT5G63230, AT4G13600, AT5G08000, AT3G58100, AT1G79480, AT2G43660, AT5G53600, AT1G29380, AT5G67460, AT4G09467, AT3G28250, AT2G04910, AT5G53610, AT2G42930, AT1G18650, AT1G78520, AT1G13830, AT1G26450, AT2G30933, AT2G43670, AT4G09466, AT2G29735, AT4G09090, AT5G63225, AT1G66852, AT1G69295, AT4G09465, AT5G63250, AT4G09462, AT5G61130, AT1G09460, AT4G05430, AT1G66870, AT5G35740, AT5G63240, AT1G66855, AT2…
TraesCS2A02G155300	M1		Protein of unknown function DUF1997	AT5G39520, AT5G39530
TraesCS2A02G156100	M1		RNA recognition motif domain	AT2G37220, AT4G24770, AT3G53460, AT5G50250, AT4G39260
TraesCS2A02G156400	M1		EF-hand domain	AT5G39670, AT3G29000
TraesCS2A02G156700	M1
TraesCS2A02G156800	M1		Zinc finger, RING-type	AT3G13430, AT4G05350, AT1G74620, AT2G44330, AT5G53910, AT3G60080, AT1G21960, AT4G12210, AT5G52150, AT3G02340, AT1G14200, AT4G12190, AT3G56580, AT1G18780, AT5G56340, AT3G51325, AT5G64920, AT3G30460, AT3G19950, AT5G08139, AT4G12150, AT3G13228, AT5G60820, AT1G55530, AT1G26800, AT1G68180, AT2G40830, AT1G60360, AT3G10815, AT1G18770, AT3G15740, AT1G18760, AT4G12140, AT4G26400, AT2G29840, AT5G15820, AT5…
TraesCS2A02G157600	M1		SANT/Myb domain	AT5G57620, AT5G11050, AT5G65230, AT4G26930, AT5G52260, AT4G37780, AT5G61420, AT5G07690, AT5G56110, AT3G48920, AT4G05100, AT3G13890, AT5G40360, AT5G60890, AT1G34670, AT5G55020, AT1G18570, AT2G47460, AT3G61250, AT1G16490, AT3G27920, AT5G14340, AT4G09460, AT5G14750, AT2G32460, AT3G01140, AT1G09540, AT1G57560, AT3G13540, AT1G66390, AT3G28470, AT1G35515, AT3G08500, AT3G47600, AT4G28110, AT3G12820, AT1…
TraesCS2A02G159000	M1
TraesCS2A02G160700	M1		Heavy metal-associated domain, HMA	AT4G08570, AT1G29100, AT5G17450, AT4G35060, AT3G56891, AT3G21490, AT4G38580, AT5G66110, AT3G48970, AT4G13380, AT1G06330, AT1G71050, AT4G39700, AT1G22990
TraesCS2A02G161000	M1	Trehalose 6-phosphate phosphatase [Source:UniProtKB/TrEMBL;Acc:A0A1D5TQB7]	Trehalose-phosphatase	AT1G78090, AT4G22590, AT4G12430, AT4G39770, AT5G65140, AT5G51460, AT1G35910, AT2G22190, AT1G22210, AT5G10100
TraesCS2A02G161600	M1		Plant lipid transfer protein/Par allergen	AT5G64080
TraesCS2A02G161700	M1		Leucine-rich repeat-containing N-terminal, plant-type	AT1G49490, AT3G24480, AT2G15880, AT4G18670, AT4G28380, AT1G62440, AT4G13340, AT3G19020, AT5G25550, AT1G12040, AT3G22800, AT4G33970
TraesCS2A02G163100	M1		Trm112-like	AT1G22270, AT1G78190
TraesCS2A02G164600	M1		GRAM domain	AT1G28200, AT4G40100, AT2G22475, AT4G01600, AT5G13200
TraesCS2A02G165600	M1		FAS1 domain	AT3G60900, AT2G45470, AT4G12730
TraesCS2A02G169300	M1		Tify domain	AT1G17380, AT1G74950, AT1G19180, AT1G72450
TraesCS2A02G169600	M1		SPX domain	AT5G15330, AT5G20150, AT2G45130, AT2G26660
TraesCS2A02G169700	M1		Transmembrane protein GPR107/GPR108-like	AT1G61670, AT1G72480, AT1G10980, AT2G01070
TraesCS2A02G170300	M1		Six-bladed beta-propeller, TolB-like	AT3G51430, AT3G51440, AT3G51420, AT3G51450
TraesCS2A02G171000	M1		Alpha/beta hydrolase fold-1	AT5G21950, AT4G33180, AT1G17430, AT1G72620
TraesCS2A02G171800	M1	Small nuclear ribonucleoprotein G [Source:UniProtKB/TrEMBL;Acc:A0A341PXD0]	LSM domain, eukaryotic/archaea-type	AT2G23930, AT3G11500
TraesCS2A02G174400	M1	UDP-arabinopyranose mutase, Pollen wall morphogenesi [Source: Projected from Oryza sativa (Os07g0604800)]	Nucleotide-diphospho-sugar transferases	AT3G02230, AT5G50750, AT5G15650, AT3G08900
TraesCS2A02G174600	M1		NADH-ubiquinone reductase complex 1 MLRQ subunit	AT3G29970, AT3G48140
TraesCS2A02G176300	M1		Ethylene-responsive binding factor-associated repression	AT3G02140, AT1G69260, AT1G13740, AT3G29575, AT3G07255
TraesCS2A02G177600	M1		X8 domain	AT5G63230, AT4G13600, AT5G08000, AT3G58100, AT1G79480, AT2G43660, AT5G53600, AT1G29380, AT5G67460, AT4G09467, AT3G28250, AT2G04910, AT5G53610, AT2G42930, AT1G18650, AT1G78520, AT1G13830, AT1G26450, AT2G30933, AT2G43670, AT4G09466, AT2G29735, AT4G09090, AT5G63225, AT1G66852, AT1G69295, AT4G09465, AT5G63250, AT4G09462, AT5G61130, AT1G09460, AT4G05430, AT1G66870, AT5G35740, AT5G63240, AT1G66855, AT2…
TraesCS2A02G181200	M1		Zinc finger C2H2-type	AT4G04404, AT1G26610, AT1G26590, AT3G60580
TraesCS2A02G182400	M1		Protein kinase domain	AT1G74360
TraesCS2A02G183100	M1		Protein of unknown function DUF3082	AT3G15110
TraesCS2A02G183300	M1			AT1G26650, AT1G69430
TraesCS2A02G183900	M1		GH3 family	AT4G37390, AT5G13370, AT2G47750, AT4G27260, AT5G13320, AT1G28130, AT1G48660, AT2G23170, AT1G23160, AT1G48670, AT2G14960, AT1G48690, AT5G54510, AT5G13360, AT5G51470, AT5G13350, AT1G59500, AT5G13380
TraesCS2A02G185600	M1		AP2/ERF domain	AT4G23750, AT3G15210, AT4G39780, AT5G43410, AT1G44830, AT2G36450, AT5G61890, AT2G31230, AT5G50080, AT4G34410, AT5G47220, AT2G44940, AT1G22810, AT4G16750, AT2G22200, AT1G71520, AT1G12980, AT1G33760, AT1G06160, AT3G57600, AT2G25820, AT5G18560, AT3G16770, AT4G31060, AT5G25190, AT1G22985, AT3G23230, AT1G24590, AT1G46768, AT5G53290, AT1G36060, AT2G35700, AT1G19210, AT3G14230, AT5G51190, AT1G01250, AT1…
TraesCS2A02G186900	M1		Glycoside hydrolase family 17	AT1G66250, AT5G56590, AT3G13560, AT1G11820, AT2G01630, AT4G29360
TraesCS2A02G187200	M1	Chlorophyll a-b binding protein, chloroplastic [Source:UniProtKB/TrEMBL;Acc:W5B474]	Chlorophyll A-B binding protein, plant	AT1G19150, AT3G61470, AT5G28450, AT3G47470
TraesCS2A02G187300	M1	Succinate--CoA ligase [ADP-forming] subunit alpha, mitochondrial [Source:UniProtKB/TrEMBL;Acc:W5B0S2]	CoA-binding	AT5G08300, AT5G23250
TraesCS2A02G187800	M1	Transcription factor, Brassinosteroid (BR)-regulated growth response, Feedback inhibition of BR biosynthesi [Source: Projected from Oryza sativa (Os07g0580500)]	BES1/BZR1 plant transcription factor, N-terminal	AT1G75080, AT1G19350, AT4G36780, AT3G50750
TraesCS2A02G188000	M1		Sugar phosphate transporter domain	AT1G21070, AT5G42420, AT4G09810, AT4G39390, AT1G76670, AT1G34020
TraesCS2A02G188900	M1		Sugar/inositol transporter	AT2G18480, AT2G20780, AT2G16130, AT3G18830, AT2G16120, AT4G36670
TraesCS2A02G189600	M1		Transcription factor GRAS	AT1G50600, AT5G48150, AT4G17230, AT2G04890
TraesCS2A02G190200	M1		Protein kinase domain	AT3G51630, AT1G64630, AT5G55560, AT3G04910, AT5G28080, AT5G41990, AT3G18750, AT3G22420, AT3G48260, AT5G58350, AT1G49160
TraesCS2A02G190800	M1		Armadillo	AT4G16490
TraesCS2A02G193000	M1		Armadillo	AT3G01400, AT5G58680
TraesCS2A02G194500	M1		Lateral organ boundaries, LOB	AT1G68510, AT4G37540, AT3G49940, AT1G67100, AT5G67420, AT3G02550
TraesCS2A02G195500	M1			AT5G42330
TraesCS2A02G196000	M1		GDP-fucose protein O-fucosyltransferase	AT1G53770, AT1G17270, AT5G50420
TraesCS2A02G196400	M1	Phenylalanine ammonia-lyase [Source:UniProtKB/TrEMBL;Acc:A0A1D5TL36]	Aromatic amino acid lyase	AT2G37040, AT5G04230, AT3G53260, AT3G10340
TraesCS2A02G196600	M1		Protein BRICK1	AT2G22640
TraesCS2A02G196700	M1		Aromatic amino acid lyase	AT2G37040, AT5G04230, AT3G53260, AT3G10340
TraesCS2A02G198500	M1		Major intrinsic protein	AT2G37170, AT3G61430, AT4G23400, AT2G39010, AT5G60660, AT4G00430, AT4G35100, AT3G54820, AT3G53420, AT2G16850, AT2G37180, AT1G01620, AT2G45960
TraesCS2A02G199300	M1		Remorin, C-terminal	AT2G41870, AT3G57540
TraesCS2A02G199900	M1		Zinc finger, CCCH-type	AT3G55980, AT2G40140, AT2G41900, AT5G12850, AT5G58620
TraesCS2A02G201900	M1		PPM-type phosphatase domain	AT5G27930, AT5G36250, AT4G32950, AT3G16800, AT3G02750, AT1G03590, AT4G03415, AT5G01700, AT5G26010, AT1G79630, AT1G16220, AT3G05640
TraesCS2A02G202100	M1		Putative cell wall protein
TraesCS2A02G203400	M1			AT2G20835, AT3G15534, AT1G52855
TraesCS2A02G204800	M1	Chlorophyll a-b binding protein, chloroplastic [Source:UniProtKB/TrEMBL;Acc:A0A1D5TM38]	Chlorophyll A-B binding protein, plant	AT2G34420, AT5G54270, AT3G27690, AT1G29930, AT2G05100, AT2G05070, AT1G76570, AT2G34430, AT1G29910, AT4G10340, AT1G29920
TraesCS2A02G205300	M1		Late embryogenesis abundant protein, LEA_2 subgroup	AT3G52470, AT5G05657, AT2G35960, AT4G01410, AT3G44220, AT5G22200, AT5G53730, AT5G06330, AT3G11660, AT4G09590, AT2G35970
TraesCS2A02G205400	M1		Armadillo	AT1G61350
TraesCS2A02G205500	M1		Sugar/inositol transporter	AT5G26250, AT3G19930, AT1G07340, AT1G50310, AT5G23270, AT1G77210, AT3G05960, AT1G11260, AT4G02050, AT4G21480, AT5G61520, AT5G26340, AT3G19940, AT1G34580
TraesCS2A02G205700	M1		Protein of unknown function DUF1223	AT5G54240, AT4G27350
TraesCS2A02G206200	M1	Chlorophyll a-b binding protein, chloroplastic [Source:UniProtKB/TrEMBL;Acc:A0A1D5V1G5]	Chlorophyll A-B binding protein, plant	AT5G01530, AT3G08940, AT2G40100
TraesCS2A02G206700	M1		At4g28100-like	AT4G28100, AT3G18050
TraesCS2A02G207500	M1		Equilibrative nucleoside transporter	AT4G05110, AT4G05120, AT1G02630, AT3G09990, AT4G05140, AT4G05130, AT1G70330, AT1G61630
TraesCS2A02G207800	M1		PB1 domain	AT4G05150
TraesCS2A02G207900	M1	Cytochrome b6-f complex iron-sulfur subunit [Source:UniProtKB/TrEMBL;Acc:A0A1D5TPW6]	Rieske iron-sulphur protein, C-terminal	AT4G03280
TraesCS2A02G213700	M1		NPH3 domain	AT3G19850, AT3G22104, AT1G50280
TraesCS2A02G214500	M1	Formin-like protein [Source:UniProtKB/TrEMBL;Acc:A0A1D5TMN2]	Formin, FH2 domain	AT3G05470, AT3G25493, AT1G70140, AT2G43800, AT1G59910, AT3G25500, AT5G54650, AT5G48360, AT3G07540, AT1G24150, AT5G67470
TraesCS2A02G214700	M1	Histone H2A [Source:UniProtKB/TrEMBL;Acc:A0A341PYW3]	Histone H2A	AT1G54690, AT4G27230, AT3G20670, AT1G51060, AT5G27670, AT5G59870, AT5G54640, AT1G08880, AT5G02560
TraesCS2A02G215000	M1		Oxygen-evolving enhancer protein 3	AT4G21280, AT4G05180
TraesCS2A02G215100	M1	Beta-amylase [Source:UniProtKB/TrEMBL;Acc:A0A1D5TQ63]	Glycoside hydrolase, family 14B, plant	AT2G32290, AT4G15210
TraesCS2A02G218700	M1		Glutathione S-transferase, N-terminal	AT1G78360, AT1G59700, AT1G78380, AT1G78370, AT1G78320, AT1G10360, AT1G59670, AT1G17190, AT2G29440, AT1G17170, AT1G27130, AT3G43800, AT1G10370, AT2G29460, AT3G09270, AT2G29490, AT2G29420, AT2G29470, AT1G69920, AT5G62480, AT1G17180, AT2G29450, AT1G27140, AT1G53680, AT2G29480, AT1G69930, AT1G78340, AT1G74590
TraesCS2A02G221500	M1		AAA+ ATPase domain	AT3G28570, AT3G28580, AT5G17730, AT2G46620, AT1G43910, AT5G40010, AT5G17750, AT3G28560, AT3G28540, AT4G25835, AT4G05340, AT4G30250, AT5G17740, AT5G57480, AT2G18193, AT3G28510, AT3G29800, AT5G40000, AT4G05380, AT5G17760, AT3G50930, AT3G50940, AT2G18190, AT3G28610, AT3G28520, AT3G28600
TraesCS2A02G222300	M1	Protein DETOXIFICATION [Source:UniProtKB/TrEMBL;Acc:A0A1D5TP38]	Multi antimicrobial extrusion protein	AT1G47530, AT4G21910, AT5G38030, AT3G03620, AT5G10420, AT5G65380, AT4G25640, AT1G33080, AT1G11670, AT1G61890, AT5G17700, AT3G26590, AT4G00350, AT3G21690, AT1G33090, AT1G33110, AT1G12950, AT1G33100, AT1G23300, AT5G44050, AT4G21903
TraesCS2A02G223600	M1		ATP synthase, F1 complex, gamma subunit	AT4G04640, AT1G15700
TraesCS2A02G224600	M1		Multicopper oxidase, type 1	AT4G28090, AT5G66920, AT1G76160, AT1G21850, AT4G37160, AT4G38420, AT1G41830, AT2G23630, AT1G75790, AT4G22010, AT1G21860
TraesCS2A02G224900	M1		Glycoside hydrolase family 17	AT1G66250, AT5G56590, AT3G13560, AT1G11820, AT2G01630, AT4G29360
TraesCS2A02G225300	M1		Lon, substrate-binding domain	AT1G19740, AT1G75460
TraesCS2A02G225900	M1		Zinc finger, Dof-type	AT3G61850, AT3G55370, AT3G52440, AT2G37590, AT2G28810, AT4G24060, AT1G29160, AT1G21340, AT5G02460, AT1G51700, AT4G21050, AT1G07640, AT5G39660, AT4G00940, AT3G21270, AT5G65590, AT4G21030, AT1G26790, AT4G38000, AT1G28310, AT3G45610, AT5G62430, AT1G47655, AT2G46590, AT5G66940, AT1G69570, AT2G28510, AT5G60850, AT5G62940, AT1G64620, AT5G60200, AT3G50410, AT2G34140, AT4G21040, AT4G21080, AT3G47500
TraesCS2A02G234900	M1		Ribose 5-phosphate isomerase, type A	AT1G71100, AT2G01290, AT3G04790
TraesCS2A02G247300	M1		Photosystem II PsbO, manganese-stabilising	AT3G50820, AT5G66570
TraesCS2A02G248800	M1		FAS1 domain	AT5G05650, AT5G06390, AT3G52370, AT3G11700, AT2G35860
TraesCS2A02G250800	M1	Similar to Glycolate oxidase (EC 1.1.3.15) (Fragment) [Source: Projected from Oryza sativa (Os07g0152900)]	FMN-dependent dehydrogenase	AT3G14420, AT3G14150, AT3G14130, AT3G14415, AT4G18360
TraesCS2A02G252600	M1		Photosystem I PsaG/PsaK protein	AT1G30380
TraesCS2A02G254600	M1		PsbP, C-terminal	AT1G06680, AT2G30790
TraesCS2A02G259000	M1		NADPH-dependent FMN reductase-like	AT4G27270, AT5G58800, AT4G36750, AT5G54500
TraesCS2A02G259200	M1		NADPH-dependent FMN reductase-like	AT4G27270, AT5G58800, AT4G36750, AT5G54500
TraesCS2A02G259500	M1		Sugar/inositol transporter	AT5G26250, AT3G19930, AT1G07340, AT1G50310, AT5G23270, AT1G77210, AT3G05960, AT1G11260, AT4G02050, AT4G21480, AT5G61520, AT5G26340, AT3G19940, AT1G34580
TraesCS2A02G259900	M1	Dirigent protein [Source:UniProtKB/TrEMBL;Acc:W5AWQ9]	Dirigent protein	AT5G49040, AT1G65870, AT3G13660, AT2G21100, AT1G58170, AT1G55210, AT2G21110, AT4G38700, AT3G13650, AT3G13662, AT5G42510, AT1G22900, AT3G58090, AT5G42500
TraesCS2A02G262400	M1		Phytocyanin domain	AT3G01070, AT2G27035
TraesCS2A02G264000	M1		Ribonuclease T2-like	AT2G39780, AT1G14210, AT1G26820, AT2G02990, AT1G14220
TraesCS2A02G264500	M1		Proton-dependent oligopeptide transporter family	AT1G27040, AT1G69850
TraesCS2A02G268800	M1		Pyridoxal 5'-phosphate synthase subunit PdxS/SNZ	AT3G16050, AT2G38230, AT5G01410, AT2G38210
TraesCS2A02G269400	M1	CASP-like protein [Source:UniProtKB/TrEMBL;Acc:W5BYK1]	Casparian strip membrane protein	AT1G17200, AT3G14380, AT5G54980
TraesCS2A02G270200	M1	WRKY transcription factor, Positive regulator in defense response, Negative regulator in GA signalin [Source: Projected from Oryza sativa (Os04g0287400)]	WRKY domain	AT4G31550, AT2G23320, AT2G30590, AT2G24570, AT3G04670, AT5G28650, AT4G24240
TraesCS2A02G271300	M1	LOB domain-containing protein 41 [Source:Projected from Arabidopsis thaliana (AT3G02550) UniProtKB/Swiss-Prot;Acc:Q9M886]	Lateral organ boundaries, LOB	AT1G68510, AT4G37540, AT3G49940, AT1G67100, AT5G67420, AT3G02550
TraesCS2A02G273100	M1		Cysteine peptidase, cysteine active site	AT3G54940, AT4G16190, AT4G39090, AT2G21430
TraesCS2A02G274400	M1		NTP pyrophosphohydrolase MazG, putative catalytic core	AT3G25400
TraesCS2A02G277600	M1		Rapid ALkalinization Factor
TraesCS2A02G277900	M1		GroES-like superfamily	AT4G13010
TraesCS2A02G280800	M1		At3g27210-like	AT3G27210, AT5G40860, AT3G01860
TraesCS2A02G282000	M1		Amino acid transporter, transmembrane domain	AT3G09340, AT5G15240, AT2G41190, AT3G28960, AT3G09330, AT2G39130, AT5G02180, AT5G02170, AT3G54830
TraesCS2A02G282300	M1		Zinc finger, MYND-type	AT5G50450, AT1G67340
TraesCS2A02G283600	M1		Protein of unknown function DUF3339	AT5G40960, AT3G27030, AT3G48660, AT3G27027, AT5G40980, AT5G08391, AT3G01950, AT5G63500, AT5G50660, AT5G14110, AT5G50560, AT3G01940
TraesCS2A02G289300	M1	Potassium transporter [Source:UniProtKB/TrEMBL;Acc:A0A1D6DBH3]	Potassium transporter	AT4G23640, AT1G60160, AT2G40540, AT1G31120, AT3G02050, AT2G30070, AT4G13420, AT4G33530, AT5G09400, AT5G14880, AT1G70300, AT4G19960, AT2G35060
TraesCS2A02G290600	M1
TraesCS2A02G291400	M1			AT5G49100, AT3G06868
TraesCS2A02G292000	M1	Arogenate dehydratase [Source:UniProtKB/TrEMBL;Acc:A0A341Q3X1]	Prephenate dehydratase	AT5G22630, AT3G44720, AT1G08250, AT1G11790, AT3G07630, AT2G27820
TraesCS2A02G292400	M1		Cytochrome P450	AT3G10570, AT1G64930, AT1G64950, AT5G61320, AT5G04660, AT1G64940, AT1G11600, AT2G12190, AT3G10560, AT1G64900, AT3G03470, AT5G04630
TraesCS2A02G295400	M1		Glycoside hydrolase, family 32	AT5G11920, AT1G62660, AT3G52600, AT1G55120, AT3G13790, AT2G36190, AT1G12240, AT3G13784
TraesCS2A02G296400	M1	Salt stress-responsive protein [Source:UniProtKB/TrEMBL;Acc:D2CFP5]	Photosystem I PsaO	AT1G08380
TraesCS2A02G297100	M1		Bifunctional inhibitor/plant lipid transfer protein/seed storage helical domain	AT2G37870, AT3G53980, AT5G05960
TraesCS2A02G297500	M1		Alkyl hydroperoxide reductase subunit C/ Thiol specific antioxidant	AT3G11630, AT5G06290
TraesCS2A02G297700	M1		Late embryogenesis abundant protein, LEA_2 subgroup	AT3G52470, AT5G05657, AT2G35960, AT4G01410, AT3G44220, AT5G22200, AT5G53730, AT5G06330, AT3G11660, AT4G09590, AT2G35970
TraesCS2A02G299100	M1		Histone H3/CENP-A	AT1G19890, AT4G40030, AT4G40040, AT1G75600, AT5G12910, AT5G10400, AT1G01370, AT1G09200, AT5G10980, AT5G10390, AT1G13370, AT5G65350, AT5G65360, AT3G27360
TraesCS2A02G302500	M1		Protein kinase domain	AT4G34500, AT1G56720, AT3G17420, AT3G59110, AT4G01330, AT5G18500, AT1G01540, AT2G42960, AT1G09440, AT4G02630
TraesCS2A02G302900	M1		Late embryogenesis abundant protein, LEA_2 subgroup	AT5G42860, AT4G35170, AT2G41990, AT3G24600, AT1G45688, AT3G24605
TraesCS2A02G304400	M1			AT1G72020
TraesCS2A02G306300	M1
TraesCS2A02G306400	M1		Regulator of chromosome condensation, RCC1	AT5G63860
TraesCS2A02G307800	M1
TraesCS2A02G312400	M1		Histone H2B	AT1G07790, AT5G22880, AT5G02570, AT3G45980, AT5G59910, AT3G09480, AT3G53650, AT3G46030, AT2G28720, AT2G37470
TraesCS2A02G313100	M1		Pectinesterase inhibitor domain
TraesCS2A02G313400	M1		F-box domain	AT4G05497, AT4G05460, AT4G03630, AT4G05475, AT5G52480, AT4G05470, AT4G05490, AT4G03625
TraesCS2A02G313900	M1
TraesCS2A02G315100	M1		Lipoxygenase	AT1G72520, AT3G22400, AT1G17420, AT3G45140, AT1G67560, AT1G55020
TraesCS2A02G318200	M1		Zinc finger, RING-type	AT3G05200, AT5G27420
TraesCS2A02G320000	M1	MAD2 [Source:UniProtKB/TrEMBL;Acc:Q5CD52]	HORMA domain	AT3G25980
TraesCS2A02G323200	M1		Zinc finger, TAZ-type	AT5G63160, AT3G48360, AT4G37610, AT1G05690, AT5G67480
TraesCS2A02G325100	M1		Cytochrome P450	AT3G53305, AT5G25140, AT5G25120, AT1G13110, AT5G57260, AT3G26270, AT3G26170, AT1G13100, AT3G26330, AT1G13080, AT3G53280, AT3G26190, AT3G53290, AT5G35715, AT3G26180, AT1G13090, AT3G26230, AT3G26300, AT3G26220, AT3G26320, AT2G02580, AT3G26160, AT3G26830, AT5G25180, AT3G26280, AT3G53300, AT3G44250, AT3G26200, AT5G25130, AT2G24180, AT4G13770, AT3G26210, AT3G26150, AT4G31500, AT3G26290, AT3G26310, AT3…
TraesCS2A02G325600	M1		Isocitrate dehydrogenase NAD-dependent	AT4G35260, AT4G35650, AT2G17130
TraesCS2A02G327900	M1		Oxoglutarate/iron-dependent dioxygenase	AT1G14130, AT1G14120, AT3G11180
TraesCS2A02G329700	M1		POLYCHOME/GIGAS CELL1	AT3G57860, AT2G42260
TraesCS2A02G330600	M1			AT3G46630, AT1G45230
TraesCS2A02G332100	M1			AT3G20180, AT5G48290, AT3G07600, AT1G55775, AT4G05030
TraesCS2A02G333500	M1	Peroxidase [Source:UniProtKB/TrEMBL;Acc:A0A341Q5I3]	Plant peroxidase	AT4G30170, AT5G47000, AT3G49960, AT5G14130, AT4G17690, AT2G18980, AT2G34060, AT5G40150, AT3G28200, AT1G24110, AT4G37520, AT4G37530, AT5G67400
TraesCS2A02G334000	M1		Bet v I/Major latex protein	AT1G70890, AT1G24000, AT1G70870, AT1G70850, AT5G28000, AT1G35260, AT1G70830, AT1G24020, AT1G70840, AT1G23130, AT5G28010, AT1G23120, AT1G35310, AT1G70860, AT1G70880
TraesCS2A02G337300	M1	Similar to 14-3-3-like protein GF14-6 [Source: Projected from Oryza sativa (Os04g0462500)]	14-3-3 protein	AT1G26480, AT1G35160, AT1G78300, AT2G42590, AT1G22300, AT5G38480, AT5G65430, AT3G02520, AT1G78220, AT1G34760, AT5G10450, AT1G22290, AT5G16050, AT4G09000
TraesCS2A02G338100	M1		Ribosomal protein PSRP-3/Ycf65	AT1G68590, AT5G15760
TraesCS2A02G338200	M1		SANT/Myb domain	AT5G57620, AT5G11050, AT5G65230, AT4G26930, AT5G52260, AT4G37780, AT5G61420, AT5G07690, AT5G56110, AT3G48920, AT4G05100, AT3G13890, AT5G40360, AT5G60890, AT1G34670, AT5G55020, AT1G18570, AT2G47460, AT3G61250, AT1G16490, AT3G27920, AT5G14340, AT4G09460, AT5G14750, AT2G32460, AT3G01140, AT1G09540, AT1G57560, AT3G13540, AT1G66390, AT3G28470, AT1G35515, AT3G08500, AT3G47600, AT4G28110, AT3G12820, AT1…
TraesCS2A02G340700	M1		Sugar/inositol transporter	AT5G26250, AT3G19930, AT1G07340, AT1G50310, AT5G23270, AT1G77210, AT3G05960, AT1G11260, AT4G02050, AT4G21480, AT5G61520, AT5G26340, AT3G19940, AT1G34580
TraesCS2A02G340900	M1		Sugar/inositol transporter	AT5G26250, AT3G19930, AT1G07340, AT1G50310, AT5G23270, AT1G77210, AT3G05960, AT1G11260, AT4G02050, AT4G21480, AT5G61520, AT5G26340, AT3G19940, AT1G34580
TraesCS2A02G342100	M1		PLAT/LH2 domain	AT2G22170, AT4G39730, AT5G65158
TraesCS2A02G342600	M1	Chlorophyll a-b binding protein, chloroplastic [Source:UniProtKB/TrEMBL;Acc:W5AY52]	Chlorophyll A-B binding protein, plant	AT1G15820
TraesCS2A02G342800	M1		Gamma-glutamyltranspeptidase	AT4G39640, AT4G29210, AT4G39650, AT1G69820
TraesCS2A02G343500	M1	Aldose 1-epimerase [Source:UniProtKB/TrEMBL;Acc:A0A096UL83]	Aldose 1-/Glucose-6-phosphate 1-epimerase	AT5G15140, AT3G17940, AT3G47800, AT3G01260
TraesCS2A02G343600	M1	Aldose 1-epimerase [Source:UniProtKB/TrEMBL;Acc:A0A341QEI0]	Aldose 1-/Glucose-6-phosphate 1-epimerase	AT5G15140, AT3G17940, AT3G47800, AT3G01260
TraesCS2A02G343800	M1	Aldose 1-epimerase [Source:UniProtKB/TrEMBL;Acc:W5AVT0]	Aldose 1-/Glucose-6-phosphate 1-epimerase	AT5G15140, AT3G17940, AT3G47800, AT3G01260
TraesCS2A02G343900	M1	Aldose 1-epimerase [Source:UniProtKB/TrEMBL;Acc:A0A1D5TBS2]	Aldose 1-/Glucose-6-phosphate 1-epimerase	AT5G15140, AT3G17940, AT3G47800, AT3G01260
TraesCS2A02G344400	M1		Oxygen-evolving enhancer protein 3	AT3G01440
TraesCS2A02G344600	M1	Glyceraldehyde-3-phosphate dehydrogenase [Source:UniProtKB/TrEMBL;Acc:A0A1D5T799]	Glyceraldehyde-3-phosphate dehydrogenase, type I	AT1G12900, AT1G42970, AT3G26650
TraesCS2A02G348900	M1	Putative zinc finger protein [Source:UniProtKB/TrEMBL;Acc:D7R604]	B-box-type zinc finger	AT2G31380, AT1G06040, AT4G39070, AT1G75540, AT1G78600, AT4G10240
TraesCS2A02G352000	M1		DOMON domain	AT5G35735, AT3G25290, AT4G12980, AT3G61750, AT5G47530, AT3G59070, AT3G07570, AT4G17280, AT5G48750
TraesCS2A02G352800	M1	Endoglucanase [Source:UniProtKB/TrEMBL;Acc:A0A341Q8R4]	Glycoside hydrolase family 9	AT4G24260, AT1G65610, AT5G49720
TraesCS2A02G353100	M1		FAS1 domain	AT3G60900, AT2G45470, AT5G55730
TraesCS2A02G353400	M1			AT5G36710, AT5G16250, AT3G02640, AT5G36800
TraesCS2A02G353500	M1		Short-chain dehydrogenase/reductase SDR	AT3G59710, AT5G51030, AT5G61830
TraesCS2A02G353900	M1		B-box-type zinc finger	AT5G15840, AT3G02380, AT5G57660, AT5G15850, AT5G24930, AT2G24790
TraesCS2A02G355300	M1	Peroxidase [Source:UniProtKB/TrEMBL;Acc:A0A1D5TCL9]	Plant peroxidase	AT2G24800, AT4G31760
TraesCS2A02G356500	M1		Protein of unknown function DUF1068	AT4G04360, AT2G32580, AT1G05070, AT2G24290, AT4G30996
TraesCS2A02G359300	M1		Leucine-rich repeat domain superfamily	AT4G06744, AT3G19320, AT1G49750
TraesCS2A02G359400	M1	Putative HAP3 subunit of the CCAAT box-binding transcription factor, Flowering time, Short-day promotion, Long-day repressio [Source: Projected from Oryza sativa (Os08g0174500)]	Transcription factor, NFYB/HAP3, conserved site	AT5G47670, AT5G47640, AT4G14540, AT2G37060, AT2G38880, AT1G09030, AT2G13570, AT3G53340, AT2G47810, AT1G21970
TraesCS2A02G360000	M1
TraesCS2A02G364000	M1	Proliferating cell nuclear antigen [Source:UniProtKB/TrEMBL;Acc:W5B985]	Proliferating cell nuclear antigen, PCNA	AT2G29570, AT1G07370
TraesCS2A02G365000	M1	Ammonium transporter [Source:UniProtKB/TrEMBL;Acc:A0A1D5TG44]	Ammonium transporter	AT3G24300, AT4G13510, AT1G64780, AT3G24290, AT4G28700
TraesCS2A02G367600	M1		TauD/TfdA-like domain	AT3G21360
TraesCS2A02G368700	M1		Protein kinase domain	AT5G41180, AT1G63430
TraesCS2A02G369700	M1		Cytochrome b561/ferric reductase transmembrane	AT1G14730, AT5G38630, AT1G26100, AT4G25570
TraesCS2A02G370300	M1		SANT/Myb domain	AT5G57620, AT5G11050, AT5G65230, AT4G26930, AT5G52260, AT4G37780, AT5G61420, AT5G07690, AT5G56110, AT3G48920, AT4G05100, AT3G13890, AT5G40360, AT5G60890, AT1G34670, AT5G55020, AT1G18570, AT2G47460, AT3G61250, AT1G16490, AT3G27920, AT5G14340, AT4G09460, AT5G14750, AT2G32460, AT3G01140, AT1G09540, AT1G57560, AT3G13540, AT1G66390, AT3G28470, AT1G35515, AT3G08500, AT3G47600, AT4G28110, AT3G12820, AT1…
TraesCS2A02G370400	M1		SANT/Myb domain	AT5G57620, AT5G11050, AT5G65230, AT4G26930, AT5G52260, AT4G37780, AT5G61420, AT5G07690, AT5G56110, AT3G48920, AT4G05100, AT3G13890, AT5G40360, AT5G60890, AT1G34670, AT5G55020, AT1G18570, AT2G47460, AT3G61250, AT1G16490, AT3G27920, AT5G14340, AT4G09460, AT5G14750, AT2G32460, AT3G01140, AT1G09540, AT1G57560, AT3G13540, AT1G66390, AT3G28470, AT1G35515, AT3G08500, AT3G47600, AT4G28110, AT3G12820, AT1…
TraesCS2A02G370700	M1		SANT/Myb domain	AT5G57620, AT5G11050, AT5G65230, AT4G26930, AT5G52260, AT4G37780, AT5G61420, AT5G07690, AT5G56110, AT3G48920, AT4G05100, AT3G13890, AT5G40360, AT5G60890, AT1G34670, AT5G55020, AT1G18570, AT2G47460, AT3G61250, AT1G16490, AT3G27920, AT5G14340, AT4G09460, AT5G14750, AT2G32460, AT3G01140, AT1G09540, AT1G57560, AT3G13540, AT1G66390, AT3G28470, AT1G35515, AT3G08500, AT3G47600, AT4G28110, AT3G12820, AT1…
TraesCS2A02G371100	M1		Short-chain dehydrogenase/reductase SDR	AT1G01800, AT2G24190, AT3G61220
TraesCS2A02G371700	M1		Protein kinase domain	AT3G45410, AT3G59740, AT3G59730, AT3G55550, AT2G43700, AT3G45330, AT5G60310, AT1G07460, AT3G45390, AT5G03140, AT5G03350, AT1G53060, AT3G53810, AT5G10530, AT5G60270, AT1G70130, AT5G01540, AT5G65600, AT3G59750, AT2G43690, AT2G29220, AT1G15530, AT3G15356, AT4G02410, AT1G53080, AT3G45440, AT5G59270, AT1G53070, AT5G01560, AT3G53380, AT2G37710, AT2G29250, AT4G02420, AT5G60280, AT1G70110, AT5G55830, AT5…
TraesCS2A02G372000	M1	Elicitor responsive gene 3 [Source:UniProtKB/TrEMBL;Acc:D3JCC7]	C2 domain	AT3G55470, AT1G63220
TraesCS2A02G372100	M1	Hexosyltransferase [Source:UniProtKB/TrEMBL;Acc:A0A1D5TDC1]	Glycosyl transferase, family 8	AT1G13250, AT4G02130, AT1G70090, AT3G06260, AT1G19300, AT1G02720, AT3G50760, AT3G28340, AT3G62660, AT1G24170
TraesCS2A02G372600	M1		Zinc finger, RING-type	AT4G03510, AT4G27470
TraesCS2A02G373000	M1		Major pollen allergen Lol pI	AT5G05290, AT2G37640, AT5G39260, AT3G55500, AT5G39270, AT2G40610, AT2G20750, AT1G20190, AT1G26770, AT2G45110, AT1G69530, AT1G12560, AT5G02260, AT4G28250, AT1G62980, AT4G38210, AT4G01630, AT5G56320, AT2G28950, AT2G03090, AT3G60570, AT5G39300, AT3G29030, AT5G39290, AT1G65681, AT2G39700, AT1G65680, AT3G15370, AT3G03220, AT5G39310, AT5G39280
TraesCS2A02G374100	M1		ABC transporter-like	AT1G17840, AT3G21090, AT1G51500, AT1G51460
TraesCS2A02G375300	M1		GRAM domain	AT5G08350, AT5G23350, AT5G23370, AT5G23360
TraesCS2A02G376300	M1	Serine carboxypeptidase-like 35 [Source:Projected from Arabidopsis thaliana (AT5G08260) UniProtKB/Swiss-Prot;Acc:Q9LEY1]	Peptidase S10, serine carboxypeptidase	AT5G23210, AT3G07990, AT4G30810, AT3G63470, AT4G12910, AT3G52020, AT5G09640, AT2G05850, AT2G35770, AT3G02110, AT5G08260, AT2G24010, AT1G11080, AT2G22990, AT4G30610, AT1G73270, AT3G56540, AT1G43780, AT2G22980, AT3G10450, AT5G42240, AT3G52000, AT5G36180, AT2G23010, AT1G73300, AT2G22970, AT3G12203, AT2G23000, AT5G42230, AT2G22960, AT1G73290, AT3G25420, AT1G73310, AT2G12480, AT2G24000, AT1G73280, AT3…
TraesCS2A02G377100	M1	Pectin acetylesterase [Source:UniProtKB/TrEMBL;Acc:W5ASU5]	Pectinacetylesterase/NOTUM	AT3G05910, AT4G19410, AT1G09550, AT3G09410, AT3G09405, AT4G19420, AT3G62060, AT5G23870, AT5G45280, AT2G46930, AT1G57590, AT5G26670
TraesCS2A02G377500	M1	Histone H3 [Source:UniProtKB/TrEMBL;Acc:A0A077RTJ8]	Histone H3/CENP-A	AT1G19890, AT4G40030, AT4G40040, AT1G75600, AT5G12910, AT5G10400, AT1G01370, AT1G09200, AT5G10980, AT5G10390, AT1G13370, AT5G65350, AT5G65360, AT3G27360
TraesCS2A02G377600	M1		Oligopeptide transporter, OPT superfamily	AT5G41000, AT3G27020, AT3G17650, AT5G24380, AT1G48370, AT5G45450, AT5G53550, AT4G24120, AT1G65730
TraesCS2A02G378400	M1		Alpha/beta hydrolase fold-1	AT1G18360, AT2G47630, AT3G62860, AT1G11090, AT1G73480, AT5G19290, AT3G55180, AT2G39420, AT3G55190, AT5G14980, AT5G16120, AT2G39400, AT1G77420, AT5G11650, AT1G52760, AT2G39410
TraesCS2A02G379800	M1		Major intrinsic protein	AT2G37170, AT3G61430, AT4G23400, AT2G39010, AT5G60660, AT4G00430, AT4G35100, AT3G54820, AT3G53420, AT2G16850, AT2G37180, AT1G01620, AT2G45960
TraesCS2A02G379900	M1		Major intrinsic protein	AT2G37170, AT3G61430, AT4G23400, AT2G39010, AT5G60660, AT4G00430, AT4G35100, AT3G54820, AT3G53420, AT2G16850, AT2G37180, AT1G01620, AT2G45960
TraesCS2A02G380000	M1		Pentatricopeptide repeat	AT3G22670
TraesCS2A02G380100	M1		Senescence regulator S40	AT3G15040, AT2G34340, AT4G18980, AT4G21930, AT4G04630, AT5G03230, AT1G61930, AT3G45210, AT1G11700, AT4G26950, AT1G29640, AT4G21970, AT2G28400, AT5G60680, AT5G45630
TraesCS2A02G380300	M1		PB1 domain	AT4G30080, AT1G77850, AT2G28350
TraesCS2A02G381000	M1	Phenylalanine ammonia-lyase [Source:UniProtKB/TrEMBL;Acc:A0A1D5TG23]	Aromatic amino acid lyase	AT2G37040, AT5G04230, AT3G53260, AT3G10340
TraesCS2A02G381100	M1	Phenylalanine ammonia-lyase [Source:UniProtKB/TrEMBL;Acc:W5AVC6]	Aromatic amino acid lyase	AT2G37040, AT5G04230, AT3G53260, AT3G10340
TraesCS2A02G381200	M1		IRX15/IRX15L/IGXM	AT1G27930, AT1G67330, AT1G33800, AT1G09610, AT1G71690, AT4G09990
TraesCS2A02G381900	M1		SANT/Myb domain	AT5G57620, AT5G11050, AT5G65230, AT4G26930, AT5G52260, AT4G37780, AT5G61420, AT5G07690, AT5G56110, AT3G48920, AT4G05100, AT3G13890, AT5G40360, AT5G60890, AT1G34670, AT5G55020, AT1G18570, AT2G47460, AT3G61250, AT1G16490, AT3G27920, AT5G14340, AT4G09460, AT5G14750, AT2G32460, AT3G01140, AT1G09540, AT1G57560, AT3G13540, AT1G66390, AT3G28470, AT1G35515, AT3G08500, AT3G47600, AT4G28110, AT3G12820, AT1…
TraesCS2A02G382100	M1		Mitochondrial import receptor subunit Tom22	AT5G43970, AT1G04070
TraesCS2A02G382200	M1		Protodermal factor 1	AT2G20515
TraesCS2A02G382400	M1		NAC domain	AT4G28530
TraesCS2A02G383100	M1		Beta-hydroxyacyl-(acyl-carrier-protein) dehydratase FabZ	AT5G10160, AT2G22230
TraesCS2A02G387100	M1		Ccc1 family	AT3G25190, AT1G21140, AT1G76800, AT3G43630, AT3G43660
TraesCS2A02G387700	M1		Glyoxalase/fosfomycin resistance/dioxygenase domain	AT1G15380, AT1G80160, AT2G28420
TraesCS2A02G388500	M1		B-box-type zinc finger	AT2G31380, AT1G06040, AT4G39070, AT1G75540, AT1G78600, AT4G10240
TraesCS2A02G388900	M1	Aldehyde dehydrogenase [Source:UniProtKB/TrEMBL;Acc:A0A1D5TCF8]	Aldehyde dehydrogenase NAD(P)-dependent	AT4G36250, AT4G34240, AT1G44170
TraesCS2A02G389100	M1	Receptor-like cytoplasmic kinase, Salt tolerance, Oxidative stress toleranc [Source: Projected from Oryza sativa (Os04g0540900)]	Protein kinase domain	AT1G33260, AT4G10390, AT1G62950
TraesCS2A02G391200	M1		Senescence regulator S40
TraesCS2A02G392500	M1
TraesCS2A02G393400	M1		Gnk2-homologous domain
TraesCS2A02G395100	M1		Zinc finger, RING-type	AT1G63840, AT3G43430, AT4G00305, AT5G41400, AT5G20885, AT4G11370, AT4G11360, AT3G61460
TraesCS2A02G395400	M1	Scarecrow-like protein 8 [Source:Projected from Arabidopsis thaliana (AT5G52510) UniProtKB/Swiss-Prot;Acc:Q9FYR7]	Transcription factor GRAS	AT5G52510
TraesCS2A02G395700	M1
TraesCS2A02G395800	M1		Protein of unknown function DUF604	AT1G07850, AT1G33250, AT5G41460, AT1G01570, AT4G23490, AT2G37730, AT5G12460, AT4G00295, AT3G11420, AT1G05280, AT4G15240, AT4G11350
TraesCS2A02G396400	M1		Aminotransferases, class-I, pyridoxal-phosphate-binding site	AT1G62960, AT4G37770, AT4G26200, AT2G22810, AT4G08040, AT5G65800, AT3G61510, AT3G49700, AT1G01480, AT4G11280, AT5G51690
TraesCS2A02G397200	M1		Protein kinase domain	AT1G75640, AT4G36180, AT5G51770, AT1G12460
TraesCS2A02G397400	M1		Linker histone H1/H5, domain H15	AT2G30620, AT2G18050, AT1G06760
TraesCS2A02G397600	M1		Linker histone H1/H5, domain H15	AT2G30620, AT2G18050, AT1G06760
TraesCS2A02G397700	M1		Linker histone H1/H5, domain H15	AT2G30620, AT2G18050, AT1G06760
TraesCS2A02G398500	M1		FAS1 domain	AT4G12730, AT5G55730, AT2G45470, AT2G24450, AT3G12660, AT3G60900, AT4G31370
TraesCS2A02G398900	M1	Subtilisin-like protease SBT1.3 [Source:Projected from Arabidopsis thaliana (AT5G51750) UniProtKB/Swiss-Prot;Acc:Q9FLI4]	Peptidase S8/S53 domain	AT4G10540, AT5G03620, AT5G59110, AT5G59120, AT4G21323, AT5G67360, AT1G66220, AT4G15040, AT5G45650, AT1G20160, AT4G10510, AT2G39850, AT3G46850, AT4G21640, AT3G46840, AT1G04110, AT4G10530, AT5G58830, AT5G59810, AT5G58840, AT5G58820, AT4G10520, AT4G00230, AT5G59090, AT4G26330, AT3G14067, AT1G01900, AT1G32980, AT2G04160, AT5G45640, AT1G32960, AT4G21630, AT5G67090, AT5G59100, AT3G14240, AT2G05920, AT4…
TraesCS2A02G399100	M1		Glucose-methanol-choline oxidoreductase, N-terminal	AT3G56060, AT5G51930, AT1G14190, AT1G73050, AT1G12570, AT1G72970, AT1G14185, AT5G51950
TraesCS2A02G401300	M1	Replication factor C subunit 2 [Source:Projected from Arabidopsis thaliana (AT1G63160) UniProtKB/Swiss-Prot;Acc:Q9CAM7]	AAA+ ATPase domain	AT1G63160
TraesCS2A02G401600	M1	Similar to Heat stress transcription factor Spl7 (Heat shock transcription factor) (Heat shock factor RHSF10) [Source: Projected from Oryza sativa (Os04g0568700)]	Heat shock factor (HSF)-type, DNA-binding	AT1G77570, AT3G24520, AT1G67970, AT5G45710, AT5G16820, AT4G13980, AT5G54070, AT4G18880, AT5G43840, AT1G32330, AT4G36990, AT3G51910, AT3G02990, AT4G19630, AT4G18870, AT1G46264, AT3G22830, AT4G11660, AT2G41690, AT5G03720, AT5G62020, AT4G17750, AT3G63350
TraesCS2A02G405100	M1		Glycoside hydrolase, family 28	AT5G44830, AT3G57510, AT3G07970, AT5G27530, AT4G32380, AT1G70500, AT1G23460, AT5G39910, AT4G35670, AT5G17200, AT3G15720, AT1G80140, AT1G80170, AT2G41850, AT4G32370, AT5G44840
TraesCS2A02G406200	M1		Multicopper oxidase, type 1	AT4G28090, AT5G66920, AT1G76160, AT1G21850, AT4G37160, AT4G38420, AT1G41830, AT2G23630, AT1G75790, AT4G22010, AT1G21860
TraesCS2A02G407500	M1		Cytochrome P450	AT2G45510, AT2G45970, AT2G44890, AT2G27690, AT4G00360, AT4G39500, AT3G56630, AT2G21910, AT1G57750, AT1G13140, AT1G47620, AT3G48520, AT5G02900, AT2G23180, AT3G01900, AT1G34540, AT1G65340, AT5G52320, AT4G39480, AT4G32170, AT5G23190, AT3G26125, AT1G01600, AT1G66030, AT5G08250, AT4G39510, AT1G69500, AT5G63450, AT1G24540, AT1G13150, AT5G58860, AT1G63710, AT4G39490
TraesCS2A02G407700	M1		Major intrinsic protein	AT2G37170, AT3G61430, AT4G23400, AT2G39010, AT5G60660, AT4G00430, AT4G35100, AT3G54820, AT3G53420, AT2G16850, AT2G37180, AT1G01620, AT2G45960
TraesCS2A02G411200	M1		Sugar phosphate transporter	AT1G30560, AT4G25220, AT3G47420, AT2G13100, AT4G17550
TraesCS2A02G413300	M1	Cyclin [Source:UniProtKB/TrEMBL;Acc:W5AWG7]	Cyclin P/U	AT3G63120, AT5G61650, AT5G07450, AT2G45080, AT3G60550, AT3G05327, AT3G21870, AT2G44740
TraesCS2A02G413800	M1		Zinc finger, FYVE/PHD-type	AT3G60520, AT1G02070
TraesCS2A02G414400	M1			AT2G27385, AT5G22430
TraesCS2A02G414700	M1		Aspartate/glutamate/uridylate kinase	AT3G57560
TraesCS2A02G415000	M1
TraesCS2A02G415100	M1		AP2/ERF domain	AT4G23750, AT3G15210, AT4G39780, AT5G43410, AT1G44830, AT2G36450, AT5G61890, AT2G31230, AT5G50080, AT4G34410, AT5G47220, AT2G44940, AT1G22810, AT4G16750, AT2G22200, AT1G71520, AT1G12980, AT1G33760, AT1G06160, AT3G57600, AT2G25820, AT5G18560, AT3G16770, AT4G31060, AT5G25190, AT1G22985, AT3G23230, AT1G24590, AT1G46768, AT5G53290, AT1G36060, AT2G35700, AT1G19210, AT3G14230, AT5G51190, AT1G01250, AT1…
TraesCS2A02G415300	M1		AP2/ERF domain	AT4G23750, AT3G15210, AT4G39780, AT5G43410, AT1G44830, AT2G36450, AT5G61890, AT2G31230, AT5G50080, AT4G34410, AT5G47220, AT2G44940, AT1G22810, AT4G16750, AT2G22200, AT1G71520, AT1G12980, AT1G33760, AT1G06160, AT3G57600, AT2G25820, AT5G18560, AT3G16770, AT4G31060, AT5G25190, AT1G22985, AT3G23230, AT1G24590, AT1G46768, AT5G53290, AT1G36060, AT2G35700, AT1G19210, AT3G14230, AT5G51190, AT1G01250, AT1…
TraesCS2A02G415700	M1
TraesCS2A02G416300	M1	Histone H4 [Source:UniProtKB/TrEMBL;Acc:A0A077RYQ1]	Histone H4	AT1G07660, AT5G59970, AT3G46320, AT3G53730, AT3G45930, AT1G07820, AT2G28740, AT5G59690
TraesCS2A02G416900	M1	nudix hydrolase homolog 8 [Source:Projected from Arabidopsis thaliana (AT5G47240) TAIR;Acc:AT5G47240]	NUDIX hydrolase domain	AT2G04450, AT2G04430, AT2G04440, AT5G47650, AT4G12720, AT4G25434, AT5G47240
TraesCS2A02G417300	M1		AP2/ERF domain	AT4G23750, AT3G15210, AT4G39780, AT5G43410, AT1G44830, AT2G36450, AT5G61890, AT2G31230, AT5G50080, AT4G34410, AT5G47220, AT2G44940, AT1G22810, AT4G16750, AT2G22200, AT1G71520, AT1G12980, AT1G33760, AT1G06160, AT3G57600, AT2G25820, AT5G18560, AT3G16770, AT4G31060, AT5G25190, AT1G22985, AT3G23230, AT1G24590, AT1G46768, AT5G53290, AT1G36060, AT2G35700, AT1G19210, AT3G14230, AT5G51190, AT1G01250, AT1…
TraesCS2A02G417700	M1	Histone H4 [Source:UniProtKB/TrEMBL;Acc:A0A077RYQ1]	Histone H4	AT1G07660, AT5G59970, AT3G46320, AT3G53730, AT3G45930, AT1G07820, AT2G28740, AT5G59690
TraesCS2A02G422900	M1		Armadillo	AT5G50900
TraesCS2A02G423900	M1		Parallel beta-helix repeat	AT4G20040, AT4G20050
TraesCS2A02G424200	M1	Zinc transporter ZIP [Source:UniProtKB/TrEMBL;Acc:Q5G1L7]	Zinc/iron permease	AT1G05300, AT4G19690, AT3G12750, AT5G62160, AT4G19680, AT4G33020, AT1G60960, AT2G04032, AT1G10970, AT1G31260, AT2G32270, AT2G30080
TraesCS2A02G424600	M1		Alcohol dehydrogenase, zinc-type, conserved site	AT4G37990, AT1G72680, AT4G37980, AT4G37970, AT4G39330, AT3G19450, AT2G21730, AT4G34230, AT2G21890
TraesCS2A02G424700	M1	Coatomer subunit epsilon [Source:UniProtKB/TrEMBL;Acc:W5AW22]	Coatomer, epsilon subunit	AT2G34840, AT1G30630
TraesCS2A02G424800	M1		Bifunctional inhibitor/plant lipid transfer protein/seed storage helical domain	AT4G22460, AT4G12480, AT4G12520, AT5G46900, AT1G62500, AT4G12490, AT4G12500, AT1G62510, AT3G22120, AT4G12530, AT2G10940, AT4G00165, AT4G12470, AT4G12550, AT4G22513, AT5G46890, AT4G22490, AT2G45180, AT4G15160, AT1G12100, AT4G12510, AT4G12545, AT1G12090, AT3G22142
TraesCS2A02G425800	M1		EGF-like calcium-binding, conserved site	AT2G30290, AT1G30900, AT2G14720, AT3G52850, AT4G20110, AT2G34940, AT2G14740
TraesCS2A02G426000	M1		Transferase	AT3G23840, AT4G24510, AT4G13840
TraesCS2A02G427100	M1
TraesCS2A02G427700	M1		AP2/ERF domain	AT4G23750, AT3G15210, AT4G39780, AT5G43410, AT1G44830, AT2G36450, AT5G61890, AT2G31230, AT5G50080, AT4G34410, AT5G47220, AT2G44940, AT1G22810, AT4G16750, AT2G22200, AT1G71520, AT1G12980, AT1G33760, AT1G06160, AT3G57600, AT2G25820, AT5G18560, AT3G16770, AT4G31060, AT5G25190, AT1G22985, AT3G23230, AT1G24590, AT1G46768, AT5G53290, AT1G36060, AT2G35700, AT1G19210, AT3G14230, AT5G51190, AT1G01250, AT1…
TraesCS2A02G430500	M1	GalAK [Source:Projected from Arabidopsis thaliana (AT3G10700) UniProtKB/TrEMBL;Acc:A0A178V5L4]	Galactokinase	AT3G10700
TraesCS2A02G435000	M1		EF-hand domain	AT1G64850
TraesCS2A02G436200	M1	Pectin acetylesterase [Source:UniProtKB/TrEMBL;Acc:A0A1D5TCZ2]	Pectinacetylesterase/NOTUM	AT3G05910, AT4G19410, AT1G09550, AT3G09410, AT3G09405, AT4G19420, AT3G62060, AT5G23870, AT5G45280, AT2G46930, AT1G57590, AT5G26670
TraesCS2A02G436300	M1			AT3G26960, AT5G13140, AT5G41050
TraesCS2A02G437700	M1	ascorbate peroxidase 4 [Source:Projected from Arabidopsis thaliana (AT4G09010) TAIR;Acc:AT4G09010]	Haem peroxidase	AT4G09010
TraesCS2A02G438300	M1	Ubiquinol oxidase [Source:UniProtKB/TrEMBL;Acc:A0A341Q9A1]	Alternative oxidase	AT5G64210, AT3G27620, AT1G32350, AT3G22360, AT3G22370
TraesCS2A02G438800	M1		Brevis radix (BRX) domain	AT3G14000, AT5G20540, AT1G31880, AT1G54180, AT2G21030, AT2G35600
TraesCS2A02G439400	M1	Ubiquinol oxidase [Source:UniProtKB/TrEMBL;Acc:A0A1D5T8S2]	Alternative oxidase	AT5G64210, AT3G27620, AT1G32350, AT3G22360, AT3G22370
TraesCS2A02G449500	M1		PPC domain	AT3G61310, AT5G46640, AT4G12080, AT5G62260, AT1G63480, AT2G45850, AT2G33620, AT4G22770, AT5G51590, AT1G63470, AT4G00200, AT4G25320
TraesCS2A02G449561	M1		Bifunctional inhibitor/plant lipid transfer protein/seed storage helical domain
TraesCS2A02G449600	M1
TraesCS2A02G450500	M1
TraesCS2A02G450700	M1		Transferase	AT3G29590, AT3G29680, AT5G39090, AT5G39050, AT1G03495, AT3G29690, AT3G29720, AT3G29670, AT5G61160, AT3G29636, AT3G29635, AT1G03940, AT5G39080
TraesCS2A02G452700	M1		Pectinesterase inhibitor domain	AT5G46960, AT5G46940, AT5G38610, AT1G54620, AT5G46950, AT5G46980, AT5G46970, AT5G46930, AT5G46990
TraesCS2A02G453200	M1		Zinc finger, RING-type	AT3G60220
TraesCS2A02G453300	M1		Malectin-like domain	AT5G39000, AT5G28680, AT2G39360, AT5G54380, AT3G46290, AT4G39110, AT3G51550, AT5G59700, AT3G04690, AT2G23200, AT5G24010, AT1G30570, AT5G38990, AT5G61350, AT2G21480
TraesCS2A02G453600	M1		Zf-FLZ domain	AT1G53903, AT5G47060, AT4G17670, AT5G49120, AT1G19200, AT1G22160, AT4G39795, AT1G78020, AT5G65040, AT1G74940, AT1G53885, AT5G20700, AT2G44670
TraesCS2A02G453700	M1		Zf-FLZ domain	AT1G53903, AT5G47060, AT4G17670, AT5G49120, AT1G19200, AT1G22160, AT4G39795, AT1G78020, AT5G65040, AT1G74940, AT1G53885, AT5G20700, AT2G44670
TraesCS2A02G453800	M1		Zf-FLZ domain	AT1G53903, AT5G47060, AT4G17670, AT5G49120, AT1G19200, AT1G22160, AT4G39795, AT1G78020, AT5G65040, AT1G74940, AT1G53885, AT5G20700, AT2G44670
TraesCS2A02G453900	M1		Zf-FLZ domain	AT1G53903, AT5G47060, AT4G17670, AT5G49120, AT1G19200, AT1G22160, AT4G39795, AT1G78020, AT5G65040, AT1G74940, AT1G53885, AT5G20700, AT2G44670
TraesCS2A02G454800	M1		Zf-FLZ domain	AT1G53903, AT5G47060, AT4G17670, AT5G49120, AT1G19200, AT1G22160, AT4G39795, AT1G78020, AT5G65040, AT1G74940, AT1G53885, AT5G20700, AT2G44670
TraesCS2A02G455400	M1		Zinc finger, RING-type	AT4G17245, AT2G35910, AT3G61550, AT1G32361, AT4G30370, AT4G10150, AT2G47560, AT2G17450, AT2G46494, AT1G49230, AT4G24015, AT2G42360, AT3G11110, AT2G37580, AT3G19140, AT5G42200, AT5G41440, AT2G44578, AT1G72310, AT1G74410, AT3G28620, AT4G17920, AT1G53820, AT1G20823, AT1G51930, AT2G28920, AT5G46650, AT5G07040, AT5G47610, AT5G01880, AT5G05280, AT4G35480, AT2G42350, AT2G46495, AT1G04360, AT2G34000, AT5…
TraesCS2A02G458600	M1		Ubiquitin-like domain	AT1G23410, AT1G65350, AT4G05050, AT1G11980, AT3G52590, AT3G62250, AT2G35635, AT1G55060, AT1G53950, AT2G36170, AT5G37640, AT3G09790, AT1G31340, AT5G03240, AT2G47110, AT4G02890, AT5G20620, AT4G05320, AT1G53930, AT1G53945
TraesCS2A02G458800	M1		Ubiquitin-like domain	AT1G23410, AT1G65350, AT4G05050, AT1G11980, AT3G52590, AT3G62250, AT2G35635, AT1G55060, AT1G53950, AT2G36170, AT5G37640, AT3G09790, AT1G31340, AT5G03240, AT2G47110, AT4G02890, AT5G20620, AT4G05320, AT1G53930, AT1G53945
TraesCS2A02G459700	M1		NAC domain	AT1G52880, AT3G15510
TraesCS2A02G460800	M1
TraesCS2A02G462600	M1		Kelch repeat type 1	AT5G40680, AT3G27150, AT1G26930, AT1G14330, AT5G60570, AT2G02870, AT1G74510
TraesCS2A02G463200	M1
TraesCS2A02G463500	M1		Ubiquitin-like domain	AT5G07220, AT5G62100, AT5G52060
TraesCS2A02G465700	M1		B3 DNA binding domain	AT4G00580, AT2G24645, AT4G00260, AT2G01800, AT2G24696, AT2G24690, AT4G31615, AT2G24700, AT4G31630, AT2G24680, AT4G31680, AT4G31660, AT4G31690, AT4G00920, AT4G31685, AT4G31610, AT5G32460, AT1G56100, AT1G55865, AT4G31650, AT4G31620, AT2G24650, AT4G31640, AT2G24681, AT1G30060, AT1G26680, AT2G02770, AT5G37190
TraesCS2A02G466800	M1		DC1	AT1G60420, AT4G31240
TraesCS2A02G467000	M1	Peroxidase [Source:UniProtKB/TrEMBL;Acc:W5AYU3]	Plant peroxidase	AT4G08780, AT4G33420, AT3G21770, AT4G08770, AT5G64110, AT2G38390, AT1G49570, AT1G14550, AT5G66390, AT5G15180, AT5G39580, AT5G06730, AT2G38380, AT2G22420, AT4G36430, AT4G26010, AT1G05260, AT1G44970, AT5G06720, AT2G39040, AT4G16270, AT3G49120, AT5G64100, AT1G71695, AT1G05240, AT3G42570, AT2G43480, AT3G32980, AT1G14540, AT5G51890, AT4G11290, AT1G34510, AT3G03670, AT5G58390, AT5G17820, AT1G68850, AT5…
TraesCS2A02G467100	M1		Basic-leucine zipper domain	AT4G35900, AT2G17770
TraesCS2A02G467500	M1		Pectinesterase inhibitor domain
TraesCS2A02G467800	M1	Signal recognition particle 14 kDa protein [Source:Projected from Arabidopsis thaliana (AT2G43640) UniProtKB/Swiss-Prot;Acc:O04421]	Signal recognition particle, SRP14 subunit	AT2G43640
TraesCS2A02G467900	M1	Aminomethyltransferase [Source:UniProtKB/TrEMBL;Acc:A0A1D5T8H3]	Aminomethyltransferase, folate-binding domain	AT1G11860
TraesCS2A02G469400	M1	Histone H4 variant TH011 [Source:UniProtKB/Swiss-Prot;Acc:P62785]	Histone H4	AT1G07660, AT5G59970, AT3G46320, AT3G53730, AT3G45930, AT1G07820, AT2G28740, AT5G59690
TraesCS2A02G473600	M1		Lipocalin/cytosolic fatty-acid binding domain	AT3G47860
TraesCS2A02G474000	M1		Homeobox domain	AT4G21750, AT3G61150, AT4G04890, AT1G79840, AT4G00730, AT1G05230
TraesCS2A02G477600	M1		Plant lipid transfer protein/Par allergen	AT3G08770, AT2G18370, AT3G51600, AT2G15050, AT2G38530, AT2G15325, AT5G59310, AT4G33355, AT5G59320, AT2G38540, AT5G01870, AT3G51590, AT5G59330
TraesCS2A02G477700	M1		Plant lipid transfer protein/Par allergen	AT3G08770, AT2G18370, AT3G51600, AT2G15050, AT2G38530, AT2G15325, AT5G59310, AT4G33355, AT5G59320, AT2G38540, AT5G01870, AT3G51590, AT5G59330
TraesCS2A02G479800	M1
TraesCS2A02G480900	M1		Glycosyltransferase 61	AT3G18180, AT3G18170
TraesCS2A02G481200	M1		NAD-dependent epimerase/dehydratase	AT1G61720
TraesCS2A02G484100	M1		Glycoside hydrolase family 16	AT2G18800, AT1G11545, AT5G57560, AT2G06850, AT4G30280, AT5G65730, AT5G13870, AT1G65310, AT3G23730, AT4G30290, AT5G57540, AT5G48070, AT4G14130, AT5G57530, AT5G57550, AT4G30270, AT4G37800, AT4G28850, AT4G03210, AT4G25820, AT4G25810
TraesCS2A02G486100	M1		Transcription factor TGA like domain	AT1G09950, AT4G18650
TraesCS2A02G487900	M1		Plastid lipid-associated protein/fibrillin conserved domain	AT2G42130, AT3G58010
TraesCS2A02G499800	M1		Amino acid transporter, transmembrane domain	AT1G77380, AT1G58360, AT5G63850, AT1G10010, AT1G44100, AT5G49630, AT5G09220, AT5G23810
TraesCS2A02G500400	M1	Glutamine synthetase [Source:UniProtKB/TrEMBL;Acc:Q45NB2]	Glutamine synthetase, catalytic domain	AT5G16570, AT3G17820, AT1G48470, AT5G37600, AT1G66200, AT5G35630
TraesCS2A02G501300	M1		C2 domain	AT5G37740, AT2G01540, AT1G48590, AT3G17980, AT1G70790, AT1G66360, AT1G23140, AT1G73580, AT1G70800, AT1G70810
TraesCS2A02G501700	M1			AT3G22210
TraesCS2A02G501800	M1		Fungal lipase-like domain	AT1G45201, AT5G67050, AT3G14360, AT5G42930, AT1G56630
TraesCS2A02G503100	M1		AP2/ERF domain	AT4G23750, AT3G15210, AT4G39780, AT5G43410, AT1G44830, AT2G36450, AT5G61890, AT2G31230, AT5G50080, AT4G34410, AT5G47220, AT2G44940, AT1G22810, AT4G16750, AT2G22200, AT1G71520, AT1G12980, AT1G33760, AT1G06160, AT3G57600, AT2G25820, AT5G18560, AT3G16770, AT4G31060, AT5G25190, AT1G22985, AT3G23230, AT1G24590, AT1G46768, AT5G53290, AT1G36060, AT2G35700, AT1G19210, AT3G14230, AT5G51190, AT1G01250, AT1…
TraesCS2A02G504300	M1		Glutathione S-transferase, N-terminal	AT1G78360, AT1G59700, AT1G78380, AT1G78370, AT1G78320, AT1G10360, AT1G59670, AT1G17190, AT2G29440, AT1G17170, AT1G27130, AT3G43800, AT1G10370, AT2G29460, AT3G09270, AT2G29490, AT2G29420, AT2G29470, AT1G69920, AT5G62480, AT1G17180, AT2G29450, AT1G27140, AT1G53680, AT2G29480, AT1G69930, AT1G78340, AT1G74590
TraesCS2A02G504700	M1		Protein kinase domain	AT5G57670, AT2G18890, AT5G35960, AT5G10520, AT3G05140, AT5G65530, AT5G18910
TraesCS2A02G512400	M1		IRX15/IRX15L/IGXM	AT3G50220, AT5G67210, AT2G15440
TraesCS2A02G514300	M1		AP2/ERF domain	AT4G23750, AT3G15210, AT4G39780, AT5G43410, AT1G44830, AT2G36450, AT5G61890, AT2G31230, AT5G50080, AT4G34410, AT5G47220, AT2G44940, AT1G22810, AT4G16750, AT2G22200, AT1G71520, AT1G12980, AT1G33760, AT1G06160, AT3G57600, AT2G25820, AT5G18560, AT3G16770, AT4G31060, AT5G25190, AT1G22985, AT3G23230, AT1G24590, AT1G46768, AT5G53290, AT1G36060, AT2G35700, AT1G19210, AT3G14230, AT5G51190, AT1G01250, AT1…
TraesCS2A02G517900	M1		Serine aminopeptidase, S33	AT4G12830, AT1G52510
TraesCS2A02G521400	M1		ABC transporter-like	AT4G01830, AT3G62150, AT1G02530, AT1G02520, AT4G18050, AT3G28360, AT3G28860, AT3G28390, AT1G10680, AT2G47000, AT5G46540, AT2G36910, AT4G01820, AT1G27940, AT3G28345, AT1G28010, AT3G28415, AT3G28380, AT4G25960
TraesCS2A02G523300	M1		Glycoside hydrolase, family 3, N-terminal	AT5G10560, AT5G09700, AT5G64570, AT5G49360, AT1G78060, AT3G19620, AT5G09730, AT1G02640
TraesCS2A02G523600	M1		Peptidase M41-like	AT2G21960
TraesCS2A02G524800	M1
TraesCS2A02G525300	M1		Protein kinase domain	AT5G18610, AT2G07180, AT1G74490, AT3G24790, AT2G28930, AT1G07570, AT5G13160, AT1G76360, AT2G26290, AT1G61590, AT3G26940, AT5G01020, AT5G15080, AT5G16500, AT4G35600, AT3G07070, AT2G39660, AT4G13190, AT5G02800, AT1G26970, AT2G28590, AT1G69790, AT5G35580, AT2G28940, AT2G39110, AT1G14370, AT3G09830, AT3G20530, AT3G55450, AT4G17660, AT1G72540, AT5G03320, AT1G20650, AT3G01300, AT5G47070, AT3G02810, AT2…
TraesCS2A02G527100	M1	ENDO1 [Source:Projected from Arabidopsis thaliana (AT1G11190) UniProtKB/TrEMBL;Acc:A0A178WKD4]	S1/P1 nuclease	AT4G21600, AT1G11190, AT4G21585, AT4G21590, AT1G68290
TraesCS2A02G528800	M1		LSM domain, eukaryotic/archaea-type	AT2G03870
TraesCS2A02G528900	M1		GNAT domain	AT5G13780
TraesCS2A02G531200	M1		Protein of unknown function wound-induced	AT4G10265, AT4G10270, AT4G33560
TraesCS2A02G531400	M1		Protein of unknown function wound-induced	AT4G10265, AT4G10270, AT4G33560
TraesCS2A02G531500	M1		Protein of unknown function wound-induced	AT4G10265, AT4G10270, AT4G33560
TraesCS2A02G531800	M1		Protein of unknown function wound-induced	AT4G10265, AT4G10270, AT4G33560
TraesCS2A02G532000	M1		Protein of unknown function wound-induced	AT4G10265, AT4G10270, AT4G33560
TraesCS2A02G532100	M1		Protein of unknown function wound-induced	AT4G10265, AT4G10270, AT4G33560
TraesCS2A02G532300	M1		Protein of unknown function wound-induced
TraesCS2A02G532400	M1		Protein of unknown function wound-induced	AT4G10265, AT4G10270, AT4G33560
TraesCS2A02G539400	M1		Heavy metal-associated domain superfamily	AT5G23760, AT5G52740, AT1G01490
TraesCS2A02G539500	M1		Heavy metal-associated domain superfamily	AT5G23760, AT5G52740, AT1G01490
TraesCS2A02G542600	M1		FAD linked oxidase, N-terminal	AT5G44440, AT4G20820, AT1G26380, AT1G01980, AT5G44390, AT4G20830, AT1G30740, AT1G30720, AT4G20860, AT4G20800, AT1G34575, AT1G30760, AT1G11770, AT1G30730, AT5G44380, AT1G30710, AT1G26420, AT5G44410, AT5G44400, AT1G26410, AT5G44360, AT1G26390, AT4G20840, AT2G34810, AT1G30700, AT2G34790, AT1G26400
TraesCS2A02G542700	M1		AP2/ERF domain	AT4G23750, AT3G15210, AT4G39780, AT5G43410, AT1G44830, AT2G36450, AT5G61890, AT2G31230, AT5G50080, AT4G34410, AT5G47220, AT2G44940, AT1G22810, AT4G16750, AT2G22200, AT1G71520, AT1G12980, AT1G33760, AT1G06160, AT3G57600, AT2G25820, AT5G18560, AT3G16770, AT4G31060, AT5G25190, AT1G22985, AT3G23230, AT1G24590, AT1G46768, AT5G53290, AT1G36060, AT2G35700, AT1G19210, AT3G14230, AT5G51190, AT1G01250, AT1…
TraesCS2A02G543800	M1		Protein of unknown function DUF1677, Oryza sativa
TraesCS2A02G545900	M1	RBR-type E3 ubiquitin transferase [Source:UniProtKB/TrEMBL;Acc:A0A341QCX3]	Zinc finger, RING-type	AT3G14250, AT3G53690
TraesCS2A02G546600	M1		Cytochrome P450	AT2G45580, AT2G45570, AT3G61035, AT2G45550, AT1G33730, AT3G52970, AT2G45560, AT3G61040, AT1G33720
TraesCS2A02G549300	M1		Myb-like domain	AT2G35640, AT1G31310
TraesCS2A02G550300	M1
TraesCS2A02G551600	M1
TraesCS2A02G557900	M1		C2 domain	AT3G57880, AT5G48060, AT1G04150, AT3G03680, AT5G06850, AT4G00700, AT4G11610, AT3G61720, AT1G51570, AT5G17980, AT3G61300, AT5G12970, AT4G20080, AT5G03435, AT5G44760, AT1G22610, AT1G74720
TraesCS2A02G563100	M1		Ribosomal protein S17/S11	AT1G79850
TraesCS2A02G570700	M1			AT5G42860, AT4G35170, AT2G41990, AT3G24600, AT1G45688, AT3G24605
TraesCS2A02G575500	M1		Thioredoxin domain	AT1G07700
TraesCS2A02G581600	M1	Oxalate--CoA ligase [Source:Projected from Arabidopsis thaliana (AT3G48990) UniProtKB/Swiss-Prot;Acc:Q9SMT7]	AMP-dependent synthetase/ligase	AT3G48990
TraesCS2A02G583100	M1		Aspartic peptidase A1 family	AT3G52500
TraesCS2A02G583500	M1		Late embryogenesis abundant protein, LEA_2 subgroup	AT2G35460, AT3G11650, AT5G06320, AT2G35980
TraesCS2A02G583600	M1		Late embryogenesis abundant protein, LEA_2 subgroup	AT3G52470, AT5G05657, AT2G35960, AT4G01410, AT3G44220, AT5G22200, AT5G53730, AT5G06330, AT3G11660, AT4G09590, AT2G35970
TraesCS2A02G583900	M1
TraesCS2A02G589400	M1		Rapid ALkalinization Factor	AT4G13950, AT3G16570, AT2G33775, AT1G02900, AT3G23805, AT4G15800, AT1G28270, AT2G20660, AT3G05490
TraesCS2A02G589600	M1
TraesCS2A02G590600	M1	NADPH-protochlorophyllide oxidoreductase [Source:UniProtKB/TrEMBL;Acc:A0A1D6RIC8]	Short-chain dehydrogenase/reductase SDR	AT4G27440, AT1G03630, AT5G54190
TraesCS2A02G591000	M1		Zinc finger, Dof-type	AT3G61850, AT3G55370, AT3G52440, AT2G37590, AT2G28810, AT4G24060, AT1G29160, AT1G21340, AT5G02460, AT1G51700, AT4G21050, AT1G07640, AT5G39660, AT4G00940, AT3G21270, AT5G65590, AT4G21030, AT1G26790, AT4G38000, AT1G28310, AT3G45610, AT5G62430, AT1G47655, AT2G46590, AT5G66940, AT1G69570, AT2G28510, AT5G60850, AT5G62940, AT1G64620, AT5G60200, AT3G50410, AT2G34140, AT4G21040, AT4G21080, AT3G47500
TraesCS2B02G000100	M1		Transferase	AT3G62160
TraesCS2B02G012600	M1		START domain	AT4G14500, AT1G64720, AT3G23080, AT5G54170
TraesCS2B02G017800	M1
TraesCS2B02G029100	M1		UDP-glucuronosyl/UDP-glucosyltransferase	AT4G34135, AT3G53150, AT2G36790, AT4G34131, AT2G36750, AT2G15480, AT2G36760, AT2G36800, AT2G15490, AT2G36780, AT4G34138, AT2G36770, AT3G53160
TraesCS2B02G031200	M1		Cytochrome P450	AT3G48310, AT3G48270, AT3G48300, AT3G48320, AT3G48280, AT3G48290
TraesCS2B02G034300	M1		Major sperm protein (MSP) domain	AT4G21410, AT4G00970
TraesCS2B02G037400	M1		Amidase signature domain	AT4G34880
TraesCS2B02G040000	M1		NADH:flavin oxidoreductase/NADH oxidase, N-terminal	AT1G76690, AT1G09400, AT1G18020, AT2G06050, AT1G76680, AT1G17990
TraesCS2B02G046900	M1
TraesCS2B02G047300	M1		Glycoside hydrolase, family 19, catalytic	AT4G01700, AT1G02360, AT3G12500
TraesCS2B02G047500	M1		NFD6/NOXY2-like	AT4G39300
TraesCS2B02G047900	M1	Glyoxylate/hydroxypyruvate reductase HPR3 [Source:Projected from Arabidopsis thaliana (AT1G12550) UniProtKB/Swiss-Prot;Acc:Q9LE33]	D-isomer specific 2-hydroxyacid dehydrogenase, catalytic domain	AT5G28310, AT1G79870, AT2G45630, AT1G12550
TraesCS2B02G048100	M1		D-isomer specific 2-hydroxyacid dehydrogenase, catalytic domain	AT5G28310, AT1G79870, AT2G45630, AT1G12550
TraesCS2B02G049000	M1		Pectinesterase inhibitor domain	AT1G70720, AT4G25260, AT5G20740, AT1G23205, AT5G62360, AT3G47380, AT2G47670, AT5G62340, AT1G62770, AT5G62350, AT2G01610, AT4G00080, AT1G14890, AT4G12390, AT3G62820, AT4G25250, AT1G62760, AT5G51520
TraesCS2B02G049200	M1		Thiolase	AT5G48230, AT5G47720
TraesCS2B02G049700	M1		Ion channel regulatory protein, UNC-93	AT1G18010, AT1G18000
TraesCS2B02G050300	M1		Dimeric alpha-beta barrel	AT3G17210
TraesCS2B02G050400	M1		Dimeric alpha-beta barrel	AT3G17210
TraesCS2B02G050600	M1			AT1G62780
TraesCS2B02G051700	M1		Zinc finger, RING-CH-type	AT5G03180, AT5G18760, AT3G06330, AT5G60580, AT3G09760
TraesCS2B02G067000	M1		Protein kinase domain	AT1G34300
TraesCS2B02G075800	M1			AT2G21140, AT4G38770
TraesCS2B02G077700	M1		Major intrinsic protein	AT2G37170, AT3G61430, AT4G23400, AT2G39010, AT5G60660, AT4G00430, AT4G35100, AT3G54820, AT3G53420, AT2G16850, AT2G37180, AT1G01620, AT2G45960
TraesCS2B02G078900	M1	Ribulose bisphosphate carboxylase small chain [Source:UniProtKB/TrEMBL;Acc:A0A341QH81]	Ribulose bisphosphate carboxylase small chain, domain	AT1G67090, AT5G38430, AT5G38410, AT5G38420
TraesCS2B02G079100	M1	Ribulose bisphosphate carboxylase small chain [Source:UniProtKB/TrEMBL;Acc:A0A1D5U6W5]	Ribulose bisphosphate carboxylase small chain, domain	AT1G67090, AT5G38430, AT5G38410, AT5G38420
TraesCS2B02G079200	M1	Ribulose bisphosphate carboxylase small chain [Source:UniProtKB/TrEMBL;Acc:A0A341QH86]	Ribulose bisphosphate carboxylase small chain, domain	AT1G67090, AT5G38430, AT5G38410, AT5G38420
TraesCS2B02G079300	M1	Ribulose bisphosphate carboxylase small chain [Source:UniProtKB/TrEMBL;Acc:W5BKP3]	Ribulose bisphosphate carboxylase small chain, domain	AT1G67090, AT5G38430, AT5G38410, AT5G38420
TraesCS2B02G079400	M1	Ribulose bisphosphate carboxylase small chain [Source:UniProtKB/TrEMBL;Acc:W5C9Y4]	Ribulose bisphosphate carboxylase small chain, domain	AT1G67090, AT5G38430, AT5G38410, AT5G38420
TraesCS2B02G079500	M1	Ribulose bisphosphate carboxylase small chain [Source:UniProtKB/TrEMBL;Acc:W5BMD1]	Ribulose bisphosphate carboxylase small chain, domain	AT1G67090, AT5G38430, AT5G38410, AT5G38420
TraesCS2B02G079600	M1			AT4G02800
TraesCS2B02G094400	M1		Protein kinase domain	AT5G39000, AT5G28680, AT2G39360, AT5G54380, AT3G46290, AT4G39110, AT3G51550, AT5G59700, AT3G04690, AT2G23200, AT5G24010, AT1G30570, AT5G38990, AT5G61350, AT2G21480
TraesCS2B02G095800	M1		UDP-glucuronosyl/UDP-glucosyltransferase	AT2G22930, AT1G50580, AT3G29630, AT4G27560, AT4G09500, AT5G54060, AT1G64920, AT4G27570, AT5G53990, AT5G54010, AT1G64910
TraesCS2B02G096200	M1	Ascorbate peroxidase, ROS homeostasis, Chloroplast protection, Carbohydrate metabolism, Plant architecture, Fertility maintenanc [Source: Projected from Oryza sativa (Os07g0694700)]	Haem peroxidase	AT3G09640, AT4G35970, AT4G35000, AT1G07890
TraesCS2B02G096400	M1		Tapetum determinant 1	AT4G24972, AT1G32583
TraesCS2B02G099500	M1		Fatty acid desaturase domain	AT5G05580, AT2G29980, AT3G11170
TraesCS2B02G101800	M1		PPM-type phosphatase, divalent cation binding	AT2G30020, AT4G08260, AT2G40180, AT2G05050, AT1G67820, AT3G27140, AT1G07160
TraesCS2B02G104200	M1		Protein kinase domain	AT5G58540, AT5G07150, AT2G40270, AT4G18640, AT5G45840, AT3G56050
TraesCS2B02G106400	M1		Short-chain dehydrogenase/reductase SDR	AT3G42960, AT2G47120, AT3G26760, AT1G52340, AT3G29260, AT4G03140, AT3G51680, AT2G47140, AT3G26770, AT3G29250, AT2G47130, AT2G47150
TraesCS2B02G106500	M1		Short-chain dehydrogenase/reductase SDR	AT3G42960, AT2G47120, AT3G26760, AT1G52340, AT3G29260, AT4G03140, AT3G51680, AT2G47140, AT3G26770, AT3G29250, AT2G47130, AT2G47150
TraesCS2B02G106600	M1		Short-chain dehydrogenase/reductase SDR	AT3G42960, AT2G47120, AT3G26760, AT1G52340, AT3G29260, AT4G03140, AT3G51680, AT2G47140, AT3G26770, AT3G29250, AT2G47130, AT2G47150
TraesCS2B02G107100	M1		Wound-induced protein Wun1-like	AT5G01740, AT3G10985
TraesCS2B02G113800	M1		EF-hand domain	AT1G66410, AT3G43810, AT3G56800, AT5G21274, AT2G41110, AT4G14640, AT2G41090, AT2G27030, AT5G37780, AT3G22930
TraesCS2B02G114900	M1		Protein kinase domain	AT5G18610, AT2G07180, AT1G74490, AT3G24790, AT2G28930, AT1G07570, AT5G13160, AT1G76360, AT2G26290, AT1G61590, AT3G26940, AT5G01020, AT5G15080, AT5G16500, AT4G35600, AT3G07070, AT2G39660, AT4G13190, AT5G02800, AT1G26970, AT2G28590, AT1G69790, AT5G35580, AT2G28940, AT2G39110, AT1G14370, AT3G09830, AT3G20530, AT3G55450, AT4G17660, AT1G72540, AT5G03320, AT1G20650, AT3G01300, AT5G47070, AT3G02810, AT2…
TraesCS2B02G116300	M1		Peptidase S8/S53 domain	AT4G10540, AT5G03620, AT5G59110, AT5G59120, AT4G21323, AT5G67360, AT1G66220, AT4G15040, AT5G45650, AT1G20160, AT4G10510, AT2G39850, AT3G46850, AT4G21640, AT3G46840, AT1G04110, AT4G10530, AT5G58830, AT5G59810, AT5G58840, AT5G58820, AT4G10520, AT4G00230, AT5G59090, AT4G26330, AT3G14067, AT1G01900, AT1G32980, AT2G04160, AT5G45640, AT1G32960, AT4G21630, AT5G67090, AT5G59100, AT3G14240, AT2G05920, AT4…
TraesCS2B02G116900	M1	Transcription factor, Response to ethylene stimulus, Wound signalin [Source: Projected from Oryza sativa (Os07g0685700)]	Ethylene insensitive 3	AT5G21120, AT2G27050, AT5G65100, AT1G73730, AT3G20770, AT5G10120
TraesCS2B02G118100	M1		Thioredoxin domain	AT5G61440, AT4G29670, AT1G08570, AT4G26160, AT2G33270
TraesCS2B02G118400	M1		NAC domain	AT3G17730, AT4G36160, AT5G04395, AT3G29035, AT1G62700, AT5G24590, AT5G17260, AT5G64060, AT3G61910, AT1G52880, AT3G15510, AT1G32770, AT5G04410, AT4G10350, AT5G13180, AT2G46770, AT5G66300, AT3G04070, AT4G27410, AT1G12260, AT2G27300, AT5G07680, AT5G53950, AT3G10480, AT1G76420, AT2G33480, AT3G49530, AT3G10500, AT3G10490, AT1G79580, AT3G12977, AT1G01720, AT5G18270, AT1G52890, AT2G24430, AT1G54330, AT5…
TraesCS2B02G118700	M1		Pleckstrin homology domain	AT2G39050
TraesCS2B02G118800	M1		Ricin B-like lectins	AT2G39050
TraesCS2B02G119100	M1		NAC domain	AT3G17730, AT4G36160, AT5G04395, AT3G29035, AT1G62700, AT5G24590, AT5G17260, AT5G64060, AT3G61910, AT1G52880, AT3G15510, AT1G32770, AT5G04410, AT4G10350, AT5G13180, AT2G46770, AT5G66300, AT3G04070, AT4G27410, AT1G12260, AT2G27300, AT5G07680, AT5G53950, AT3G10480, AT1G76420, AT2G33480, AT3G49530, AT3G10500, AT3G10490, AT1G79580, AT3G12977, AT1G01720, AT5G18270, AT1G52890, AT2G24430, AT1G54330, AT5…
TraesCS2B02G119200	M1		Nucleoside phosphatase GDA1/CD39	AT3G04080, AT5G18280
TraesCS2B02G119600	M1		Oxidoreductase FAD/NAD(P)-binding	AT1G15140
TraesCS2B02G121000	M1		Cytochrome P450	AT2G26710, AT4G27710, AT3G14690, AT3G14620, AT3G14640, AT5G24900, AT3G14610, AT3G14660, AT5G52400, AT3G14680, AT2G46960, AT5G38450, AT3G14650, AT1G67110, AT1G17060, AT3G14630, AT5G24910, AT1G75130, AT2G46950
TraesCS2B02G121100	M1		Protein kinase domain	AT5G05160, AT2G36570, AT3G08680, AT1G64210, AT5G41680, AT3G17840, AT4G23740, AT2G26730, AT3G02880, AT5G58300, AT1G48480, AT5G53320, AT5G16590
TraesCS2B02G121600	M1		Probable zinc-ribbon domain, plant	AT3G56410, AT5G05190
TraesCS2B02G124100	M1	Non-specific serine/threonine protein kinase [Source:UniProtKB/TrEMBL;Acc:W5BKU9]	Protein kinase domain	AT4G30960, AT1G49180, AT2G30360, AT5G25110, AT5G07070, AT2G25090, AT2G38490, AT1G30270, AT3G61960, AT5G57630, AT3G53930, AT4G14580, AT5G21222, AT5G45810, AT5G01810, AT5G45820, AT4G18700, AT5G58380, AT5G21326, AT5G10930, AT2G34180, AT2G37840, AT1G29230, AT1G48260, AT4G24400, AT5G01820, AT5G35410, AT5G57565, AT3G17510, AT3G23000, AT2G26980, AT1G01140
TraesCS2B02G127600	M1	Pectinesterase [Source:UniProtKB/TrEMBL;Acc:W5BMF4]	Pectinesterase, catalytic	AT1G02810, AT5G53370, AT1G11590, AT3G43270, AT2G26440, AT5G04970, AT4G02320, AT3G62170, AT4G03930, AT4G00190, AT1G44980, AT2G47040, AT2G43050, AT4G33230, AT3G06830, AT2G47030, AT3G59010, AT4G15980, AT4G02330, AT5G51490, AT1G53840, AT2G45220, AT4G02300, AT3G14310, AT3G10710, AT5G09760, AT5G04960, AT4G33220, AT3G10720, AT3G60730, AT2G26450, AT3G05610, AT5G49180, AT3G27980, AT5G20860, AT3G47400, AT3…
TraesCS2B02G127800	M1	Ethylene-responsive transcription factor ERF071 [Source:Projected from Arabidopsis thaliana (AT2G47520) UniProtKB/Swiss-Prot;Acc:O22259]	AP2/ERF domain	AT4G23750, AT3G15210, AT4G39780, AT5G43410, AT1G44830, AT2G36450, AT5G61890, AT2G31230, AT5G50080, AT4G34410, AT5G47220, AT2G44940, AT1G22810, AT4G16750, AT2G22200, AT1G71520, AT1G12980, AT1G33760, AT1G06160, AT3G57600, AT2G25820, AT5G18560, AT3G16770, AT4G31060, AT5G25190, AT1G22985, AT3G23230, AT1G24590, AT1G46768, AT5G53290, AT1G36060, AT2G35700, AT1G19210, AT3G14230, AT5G51190, AT1G01250, AT1…
TraesCS2B02G129600	M1		NAD(P)-binding domain	AT3G62830, AT2G28760, AT3G46440, AT3G53520, AT5G59290, AT2G47650
TraesCS2B02G130300	M1		Photosystem II PsbX	AT2G06520
TraesCS2B02G130500	M1		Universal stress protein A family	AT3G53990, AT5G49050, AT3G62550, AT3G11930, AT3G58450, AT3G17020, AT1G09740, AT3G03270, AT2G47710, AT3G25930, AT1G68300
TraesCS2B02G131200	M1		Universal stress protein A family	AT3G53990, AT5G49050, AT3G62550, AT3G11930, AT3G58450, AT3G17020, AT1G09740, AT3G03270, AT2G47710, AT3G25930, AT1G68300
TraesCS2B02G131300	M1		Universal stress protein A family	AT3G53990, AT5G49050, AT3G62550, AT3G11930, AT3G58450, AT3G17020, AT1G09740, AT3G03270, AT2G47710, AT3G25930, AT1G68300
TraesCS2B02G133500	M1		Photosystem I reaction centre subunit N, chloroplastic	AT5G64040
TraesCS2B02G134300	M1	40S ribosomal protein S21 [Source:UniProtKB/TrEMBL;Acc:A0A0C4BJ86]	Ribosomal protein S21e	AT3G53890, AT5G27700
TraesCS2B02G137700	M1
TraesCS2B02G141100	M1
TraesCS2B02G145600	M1
TraesCS2B02G148900	M1		PAM2-containing protein CID1/CID2	AT4G14270, AT2G41430
TraesCS2B02G151100	M1	E3 ubiquitin-protein ligase [Source:UniProtKB/TrEMBL;Acc:A0A341QHR5]	Zinc finger, RING-type	AT3G58040, AT5G53360, AT3G13672, AT3G61790, AT4G27880, AT2G41980
TraesCS2B02G152600	M1		Aspartic peptidase A1 family	AT4G30040, AT1G79720, AT5G07030, AT4G12920, AT5G24820, AT1G25510, AT3G61820, AT2G28010, AT2G42980, AT3G18490, AT5G10760, AT2G28030, AT1G09750, AT2G03200, AT4G30030, AT3G59080, AT2G23945, AT2G28225, AT3G54400, AT3G20015, AT5G10770, AT1G01300, AT2G28040, AT2G28220
TraesCS2B02G154100	M1		Protein kinase domain	AT3G51740
TraesCS2B02G154500	M1			AT3G27770, AT1G10660, AT2G47115, AT1G70505, AT5G62960
TraesCS2B02G157100	M1	Carboxypeptidase [Source:UniProtKB/TrEMBL;Acc:A0A1D5UCV3]	Peptidase S10, serine carboxypeptidase	AT5G23210, AT3G07990, AT4G30810, AT3G63470, AT4G12910, AT3G52020, AT5G09640, AT2G05850, AT2G35770, AT3G02110, AT5G08260, AT2G24010, AT1G11080, AT2G22990, AT4G30610, AT1G73270, AT3G56540, AT1G43780, AT2G22980, AT3G10450, AT5G42240, AT3G52000, AT5G36180, AT2G23010, AT1G73300, AT2G22970, AT3G12203, AT2G23000, AT5G42230, AT2G22960, AT1G73290, AT3G25420, AT1G73310, AT2G12480, AT2G24000, AT1G73280, AT3…
TraesCS2B02G157500	M1		Uncharacterised protein family UPF0114	AT5G13720, AT4G19390
TraesCS2B02G157900	M1		Choline transporter-like	AT5G13760
TraesCS2B02G164900	M1		F-box-like domain superfamily
TraesCS2B02G166800	M1		Endonuclease/exonuclease/phosphatase	AT2G48030, AT3G21530
TraesCS2B02G168100	M1
TraesCS2B02G170000	M1		Gnk2-homologous domain
TraesCS2B02G171400	M1		GroES-like superfamily	AT1G14980, AT1G23100
TraesCS2B02G173500	M1	Peroxidase [Source:UniProtKB/TrEMBL;Acc:W5BMF3]	Plant peroxidase	AT4G08780, AT4G33420, AT3G21770, AT4G08770, AT5G64110, AT2G38390, AT1G49570, AT1G14550, AT5G66390, AT5G15180, AT5G39580, AT5G06730, AT2G38380, AT2G22420, AT4G36430, AT4G26010, AT1G05260, AT1G44970, AT5G06720, AT2G39040, AT4G16270, AT3G49120, AT5G64100, AT1G71695, AT1G05240, AT3G42570, AT2G43480, AT3G32980, AT1G14540, AT5G51890, AT4G11290, AT1G34510, AT3G03670, AT5G58390, AT5G17820, AT1G68850, AT5…
TraesCS2B02G174500	M1		Six-bladed beta-propeller, TolB-like	AT1G21670, AT1G21680, AT4G01870
TraesCS2B02G179400	M1		NADH-ubiquinone oxidoreductase, 21kDa subunit, N-terminal	AT4G16450
TraesCS2B02G180300	M1		X8 domain	AT5G63230, AT4G13600, AT5G08000, AT3G58100, AT1G79480, AT2G43660, AT5G53600, AT1G29380, AT5G67460, AT4G09467, AT3G28250, AT2G04910, AT5G53610, AT2G42930, AT1G18650, AT1G78520, AT1G13830, AT1G26450, AT2G30933, AT2G43670, AT4G09466, AT2G29735, AT4G09090, AT5G63225, AT1G66852, AT1G69295, AT4G09465, AT5G63250, AT4G09462, AT5G61130, AT1G09460, AT4G05430, AT1G66870, AT5G35740, AT5G63240, AT1G66855, AT2…
TraesCS2B02G181300	M1
TraesCS2B02G181600	M1		RNA recognition motif domain	AT2G37220, AT4G24770, AT3G53460, AT5G50250
TraesCS2B02G182000	M1		EF-hand domain	AT5G39670, AT3G29000
TraesCS2B02G182300	M1		Zinc finger, RING-type	AT3G13430, AT4G05350, AT1G74620, AT2G44330, AT5G53910, AT3G60080, AT1G21960, AT4G12210, AT5G52150, AT3G02340, AT1G14200, AT4G12190, AT3G56580, AT1G18780, AT5G56340, AT3G51325, AT5G64920, AT3G30460, AT3G19950, AT5G08139, AT4G12150, AT3G13228, AT5G60820, AT1G55530, AT1G26800, AT1G68180, AT2G40830, AT1G60360, AT3G10815, AT1G18770, AT3G15740, AT1G18760, AT4G12140, AT4G26400, AT2G29840, AT5G15820, AT5…
TraesCS2B02G182900	M1		Ribonuclease T2-like	AT2G39780, AT1G14210, AT1G26820, AT2G02990, AT1G14220
TraesCS2B02G183100	M1		SANT/Myb domain	AT5G57620, AT5G11050, AT5G65230, AT4G26930, AT5G52260, AT4G37780, AT5G61420, AT5G07690, AT5G56110, AT3G48920, AT4G05100, AT3G13890, AT5G40360, AT5G60890, AT1G34670, AT5G55020, AT1G18570, AT2G47460, AT3G61250, AT1G16490, AT3G27920, AT5G14340, AT4G09460, AT5G14750, AT2G32460, AT3G01140, AT1G09540, AT1G57560, AT3G13540, AT1G66390, AT3G28470, AT1G35515, AT3G08500, AT3G47600, AT4G28110, AT3G12820, AT1…
TraesCS2B02G183500	M1		Ribosomal protein S4/S9, N-terminal	AT5G15200, AT5G39850
TraesCS2B02G185800	M1		Protein kinase domain	AT2G27060, AT4G20940, AT5G10020
TraesCS2B02G186000	M1	Histone H3 [Source:UniProtKB/TrEMBL;Acc:A0A1D5UF35]	Histone H3/CENP-A	AT1G19890, AT4G40030, AT4G40040, AT1G75600, AT5G12910, AT5G10400, AT1G01370, AT1G09200, AT5G10980, AT5G10390, AT1G13370, AT5G65350, AT5G65360, AT3G27360
TraesCS2B02G186700	M1		Ribosomal protein L7/L12	AT2G03130, AT1G70190, AT4G37660, AT3G06040, AT4G36420
TraesCS2B02G187500	M1	WRKY transcription factor WRKY1A [Source:UniProtKB/TrEMBL;Acc:A7X9Y3]	WRKY domain	AT4G11070, AT4G23810, AT3G56400, AT5G24110, AT2G46400
TraesCS2B02G187600	M1		Plant lipid transfer protein/Par allergen	AT5G64080
TraesCS2B02G188500	M1	Transcription elongation factor SPT4 homolog [Source:UniProtKB/TrEMBL;Acc:W5BPZ4]	Transcription initiation Spt4	AT5G08565, AT5G63670
TraesCS2B02G188900	M1		Trm112-like	AT1G22270, AT1G78190
TraesCS2B02G189000	M1	Endoplasmic reticulum (ER) membrane protein, Early tapetum development and meiosi [Source: Projected from Oryza sativa (Os07g0622900)]	Signal peptidase complex subunit Spc1/SPCS1	AT1G34640
TraesCS2B02G190300	M1		Knottin, scorpion toxin-like superfamily
TraesCS2B02G192000	M1		Protein of unknown function DUF1645, plant	AT2G26530, AT2G15760
TraesCS2B02G193800	M1	Dirigent protein [Source:UniProtKB/TrEMBL;Acc:A0A1D5U9U9]	Dirigent protein	AT5G49040, AT1G65870, AT3G13660, AT2G21100, AT1G58170, AT1G55210, AT2G21110, AT4G38700, AT3G13650, AT3G13662, AT5G42510, AT1G22900, AT3G58090, AT5G42500
TraesCS2B02G195900	M1		SPX domain	AT5G15330, AT5G20150, AT2G45130, AT2G26660
TraesCS2B02G196000	M1		Transmembrane protein GPR107/GPR108-like	AT1G61670, AT1G72480, AT1G10980, AT2G01070
TraesCS2B02G197400	M1		Alpha/beta hydrolase fold-1	AT5G21950, AT4G33180, AT1G17430, AT1G72620
TraesCS2B02G199800	M1		Transcription factor, NFYB/HAP3, conserved site	AT5G47670, AT5G47640, AT4G14540, AT2G37060, AT2G38880, AT1G09030, AT2G13570, AT3G53340, AT2G47810, AT1G21970
TraesCS2B02G200300	M1		Protein egg apparatus-1
TraesCS2B02G201000	M1		NADH-ubiquinone reductase complex 1 MLRQ subunit	AT3G29970, AT3G48140
TraesCS2B02G203400	M1		FAS1 domain	AT3G60900, AT2G45470, AT4G12730
TraesCS2B02G203600	M1	RBR-type E3 ubiquitin transferase [Source:UniProtKB/TrEMBL;Acc:A0A1D5U711]	Zinc finger, RING-type	AT3G14250, AT3G53690
TraesCS2B02G207800	M1		Zinc finger C2H2-type	AT4G04404, AT1G26610, AT1G26590, AT3G60580
TraesCS2B02G209900	M1			AT1G26650, AT1G69430
TraesCS2B02G210600	M1		GH3 family	AT4G37390, AT5G13370, AT2G47750, AT4G27260, AT5G13320, AT1G28130, AT1G48660, AT2G23170, AT1G23160, AT1G48670, AT2G14960, AT1G48690, AT5G54510, AT5G13360, AT5G51470, AT5G13350, AT1G59500, AT5G13380
TraesCS2B02G211000	M1			AT5G42330
TraesCS2B02G211100	M1		Gibberellin regulated protein
TraesCS2B02G212400	M1		Lateral organ boundaries, LOB	AT1G68510, AT4G37540, AT3G49940, AT1G67100, AT5G67420, AT3G02550
TraesCS2B02G214900	M1			AT1G10220, AT1G59590
TraesCS2B02G215800	M1		Cysteine-rich transmembrane CYSTM domain
TraesCS2B02G216400	M1		Aldehyde dehydrogenase domain	AT2G24270
TraesCS2B02G216800	M1		Protein kinase domain	AT3G51630, AT1G64630, AT5G55560, AT3G04910, AT5G28080, AT5G41990, AT3G18750, AT3G22420, AT3G48260, AT5G58350, AT1G49160
TraesCS2B02G217200	M1			AT2G01580, AT3G46890, AT5G05950, AT3G07510
TraesCS2B02G217500	M1		Transcription factor GRAS	AT1G50600, AT5G48150, AT4G17230, AT2G04890
TraesCS2B02G218400	M1		Sugar/inositol transporter	AT2G18480, AT2G20780, AT2G16130, AT3G18830, AT2G16120, AT4G36670
TraesCS2B02G219200	M1		Sugar phosphate transporter domain	AT1G21070, AT5G42420, AT4G09810, AT4G39390, AT1G76670, AT1G34020
TraesCS2B02G219300	M1	Transcription factor, Brassinosteroid (BR)-regulated growth response, Feedback inhibition of BR biosynthesi [Source: Projected from Oryza sativa (Os07g0580500)]	BES1/BZR1 plant transcription factor, N-terminal	AT1G75080, AT1G19350, AT4G36780, AT3G50750
TraesCS2B02G219500	M1
TraesCS2B02G220000	M1	Succinate--CoA ligase [ADP-forming] subunit alpha, mitochondrial [Source:UniProtKB/TrEMBL;Acc:A0A1D5U8R6]	CoA-binding	AT5G08300, AT5G23250
TraesCS2B02G221800	M1	Tubulin alpha chain [Source:UniProtKB/TrEMBL;Acc:A4K4Z3]	Tubulin	AT5G19780, AT4G14960, AT5G19770, AT1G64740, AT1G50010, AT1G04820
TraesCS2B02G223400	M1		Ribosomal protein S15	AT3G60770, AT4G00100
TraesCS2B02G223700	M1		GDP-fucose protein O-fucosyltransferase	AT1G53770, AT1G17270, AT5G50420
TraesCS2B02G223800	M1
TraesCS2B02G224200	M1		Protein BRICK1	AT2G22640
TraesCS2B02G224300	M1	Phenylalanine ammonia-lyase [Source:UniProtKB/TrEMBL;Acc:A0A1D5UB55]	Aromatic amino acid lyase	AT2G37040, AT5G04230, AT3G53260, AT3G10340
TraesCS2B02G226600	M1		Remorin, C-terminal	AT2G41870, AT3G57540
TraesCS2B02G228000	M1	Scarecrow-like protein 23 [Source:Projected from Arabidopsis thaliana (AT5G41920) UniProtKB/Swiss-Prot;Acc:Q9FHZ1]	Transcription factor GRAS	AT5G41920, AT3G54220
TraesCS2B02G228300	M1		Cytochrome c-like domain	AT5G45040
TraesCS2B02G229000	M1		PPM-type phosphatase domain	AT5G27930, AT5G36250, AT4G32950, AT3G16800, AT3G02750, AT1G03590, AT4G03415, AT5G01700, AT5G26010, AT1G79630, AT1G16220, AT3G05640
TraesCS2B02G229200	M1		Putative cell wall protein
TraesCS2B02G230500	M1		Cytochrome P450	AT2G26710, AT4G27710, AT3G14690, AT3G14620, AT3G14640, AT5G24900, AT3G14610, AT3G14660, AT5G52400, AT3G14680, AT2G46960, AT5G38450, AT3G14650, AT1G67110, AT1G17060, AT3G14630, AT5G24910, AT1G75130, AT2G46950
TraesCS2B02G230700	M1			AT2G20835, AT3G15534, AT1G52855
TraesCS2B02G232600	M1
TraesCS2B02G232700	M1		Late embryogenesis abundant protein, LEA_2 subgroup	AT3G52470, AT5G05657, AT2G35960, AT4G01410, AT3G44220, AT5G22200, AT5G53730, AT5G06330, AT3G11660, AT4G09590, AT2G35970
TraesCS2B02G233100	M1		Protein of unknown function wound-induced
TraesCS2B02G233400	M1	Chlorophyll a-b binding protein, chloroplastic [Source:UniProtKB/TrEMBL;Acc:A0A0C4BJ37]	Chlorophyll A-B binding protein, plant	AT5G01530, AT3G08940, AT2G40100, AT1G61520
TraesCS2B02G233900	M1		At4g28100-like	AT4G28100, AT3G18050
TraesCS2B02G234400	M1		PB1 domain	AT4G05150
TraesCS2B02G234500	M1	Cytochrome b6-f complex iron-sulfur subunit [Source:UniProtKB/TrEMBL;Acc:A0A1D5UCN7]	Rieske iron-sulphur protein, C-terminal	AT4G03280
TraesCS2B02G234800	M1	Putative cyclin-D6-1 [Source:Projected from Arabidopsis thaliana (AT4G03270) UniProtKB/Swiss-Prot;Acc:Q9ZR04]	Cyclin, C-terminal domain	AT4G37630, AT5G10440, AT4G03270, AT5G02110, AT5G67260, AT2G22490, AT5G65420, AT4G34160, AT1G70210, AT3G50070
TraesCS2B02G236900	M1	Serine/threonine-protein kinase [Source:UniProtKB/TrEMBL;Acc:A0A1D5UCU4]	Protein kinase domain	AT4G23240, AT4G23230, AT4G11490, AT1G61380, AT4G04490, AT1G61460, AT1G67520, AT1G11280, AT4G23260, AT4G27290, AT4G21400, AT4G23140, AT4G23190, AT4G21410, AT4G23130, AT4G27300, AT4G00970, AT4G11530, AT4G28670, AT1G11330, AT4G11460, AT1G11410, AT4G21366, AT4G05200, AT4G11470, AT1G61490, AT1G61500, AT4G23250, AT1G61420, AT1G11300, AT1G61550, AT2G01780, AT1G70520, AT5G39370, AT3G12000, AT3G45860, AT4…
TraesCS2B02G238200	M1		Syntaxin, N-terminal domain	AT5G08080, AT3G03800
TraesCS2B02G238600	M1		SKP1/BTB/POZ domain superfamily	AT3G19850, AT3G22104, AT1G50280
TraesCS2B02G239600	M1	Protein H2A.7 [Source:UniProtKB/Swiss-Prot;Acc:Q43312]	Histone H2A	AT1G54690, AT4G27230, AT3G20670, AT1G51060, AT5G27670, AT5G59870, AT5G54640, AT1G08880, AT5G02560
TraesCS2B02G239700	M1	Histone H2A [Source:UniProtKB/TrEMBL;Acc:W5BNS0]	Histone H2A	AT1G54690, AT4G27230, AT3G20670, AT1G51060, AT5G27670, AT5G59870, AT5G54640, AT1G08880, AT5G02560
TraesCS2B02G240000	M1		Oxygen-evolving enhancer protein 3	AT4G21280, AT4G05180
TraesCS2B02G240100	M1	Beta-amylase [Source:UniProtKB/TrEMBL;Acc:A0A341QMQ6]	Glycoside hydrolase, family 14B, plant	AT2G32290, AT4G15210
TraesCS2B02G241500	M1		Protein kinase domain	AT4G23240, AT4G23230, AT4G11490, AT1G61380, AT4G04490, AT1G61460, AT1G67520, AT1G11280, AT4G23260, AT4G27290, AT4G21400, AT4G23140, AT4G23190, AT4G21410, AT4G23130, AT4G27300, AT4G00970, AT4G11530, AT4G28670, AT1G11330, AT4G11460, AT1G11410, AT4G21366, AT4G05200, AT4G11470, AT1G61490, AT1G61500, AT4G23250, AT1G61420, AT1G11300, AT1G61550, AT2G01780, AT1G70520, AT5G39370, AT3G12000, AT3G45860, AT4…
TraesCS2B02G244500	M1	Xyloglucan endotransglucosylase/hydrolase [Source:UniProtKB/TrEMBL;Acc:A0A1D5U7D5]	Glycoside hydrolase family 16	AT2G18800, AT1G11545, AT5G57560, AT2G06850, AT4G30280, AT5G65730, AT5G13870, AT1G65310, AT3G23730, AT4G30290, AT5G57540, AT5G48070, AT4G14130, AT5G57530, AT5G57550, AT4G30270, AT4G37800, AT4G28850, AT4G03210, AT4G25820, AT4G25810
TraesCS2B02G245800	M1		VASCULAR-RELATED UNKNOWN PROTEIN	AT3G21710, AT5G54790
TraesCS2B02G246600	M1		Ankyrin repeat-containing domain	AT1G50900
TraesCS2B02G247700	M1	Protein DETOXIFICATION [Source:UniProtKB/TrEMBL;Acc:W5BL55]	Multi antimicrobial extrusion protein	AT1G47530, AT4G21910, AT5G38030, AT3G03620, AT5G10420, AT5G65380, AT4G25640, AT1G33080, AT1G11670, AT1G61890, AT5G17700, AT3G26590, AT4G00350, AT3G21690, AT1G33090, AT1G33110, AT1G12950, AT1G33100, AT1G23300, AT5G44050, AT4G21903
TraesCS2B02G247900	M1		Senescence regulator S40	AT3G15040, AT2G34340, AT4G18980, AT4G21930, AT4G04630, AT5G03230, AT1G61930, AT3G45210, AT1G11700, AT4G26950, AT1G29640, AT4G21970, AT2G28400, AT5G60680, AT5G45630
TraesCS2B02G256300	M1		Cyanobacterial aminoacyl-tRNA synthetase, CAAD domain	AT1G52220, AT2G46820
TraesCS2B02G263900	M1		FAS1 domain	AT5G05650, AT5G06390, AT3G52370, AT3G11700, AT2G35860
TraesCS2B02G264000	M1		Tify domain	AT3G22275, AT1G30135, AT2G34600
TraesCS2B02G264100	M1	Similar to Glycolate oxidase (EC 1.1.3.15) (Fragment) [Source: Projected from Oryza sativa (Os07g0152900)]	FMN-dependent dehydrogenase	AT3G14420, AT3G14150, AT3G14130, AT3G14415, AT4G18360
TraesCS2B02G265800	M1		Transcription factor, TCP	AT1G67260, AT3G18550, AT2G31070, AT4G18390, AT1G53230, AT5G60970, AT3G15030, AT5G08070, AT3G02150, AT1G68800, AT1G30210
TraesCS2B02G266700	M1		Protein kinase domain	AT5G65710, AT1G75820, AT4G28490, AT3G49670, AT4G20270, AT5G48940, AT3G19700, AT3G24240, AT5G65700, AT1G28440, AT5G49660, AT1G08590, AT1G09970, AT4G28650, AT5G61480
TraesCS2B02G267500	M1		PsbP, C-terminal	AT1G06680, AT2G30790
TraesCS2B02G268300	M1		Protein of unknown function DUF1005	AT3G19680, AT4G29310, AT5G17640, AT1G50040, AT1G10020
TraesCS2B02G270300	M1	Oxygen evolving enhancer protein [Source:UniProtKB/TrEMBL;Acc:W5B9L0]	Photosystem II PsbO, manganese-stabilising	AT3G50820, AT5G66570
TraesCS2B02G272300	M1		Photosystem I PsaG/PsaK protein	AT1G30380
TraesCS2B02G273900	M1		ATP synthase, F1 complex, gamma subunit	AT4G04640, AT1G15700
TraesCS2B02G274100	M1			AT2G18910
TraesCS2B02G274800	M1		Multicopper oxidase, type 1	AT4G28090, AT5G66920, AT1G76160, AT1G21850, AT4G37160, AT4G38420, AT1G41830, AT2G23630, AT1G75790, AT4G22010, AT1G21860
TraesCS2B02G277600	M1		Proton-dependent oligopeptide transporter family	AT1G27040, AT1G69850
TraesCS2B02G278200	M1		Ribonuclease T2-like	AT2G39780, AT1G14210, AT1G26820, AT2G02990, AT1G14220
TraesCS2B02G278400	M1			AT5G43150
TraesCS2B02G279700	M1		Phytocyanin domain	AT3G01070, AT2G27035
TraesCS2B02G286300	M1		Senescence regulator S40	AT3G15040, AT2G34340, AT4G18980, AT4G21930, AT4G04630, AT5G03230, AT1G61930, AT3G45210, AT1G11700, AT4G26950, AT1G29640, AT4G21970, AT2G28400, AT5G60680, AT5G45630
TraesCS2B02G288100	M1	CASP-like protein [Source:UniProtKB/TrEMBL;Acc:W5BFF0]	Casparian strip membrane protein	AT1G17200, AT3G14380, AT5G54980
TraesCS2B02G289000	M1		Zn-cluster domain	AT4G31550, AT2G23320, AT2G30590, AT2G24570, AT3G04670, AT5G28650, AT4G24240
TraesCS2B02G292300	M1		NTP pyrophosphohydrolase MazG, putative catalytic core	AT3G25400
TraesCS2B02G299700	M1		Zinc finger, MYND-type	AT5G50450, AT1G67340
TraesCS2B02G300000	M1		Zinc finger protein SHOOT GRAVITROPISM 5-like
TraesCS2B02G305900	M1	Potassium transporter [Source:UniProtKB/TrEMBL;Acc:A0A096UMH2]	Potassium transporter	AT4G23640, AT1G60160, AT2G40540, AT1G31120, AT3G02050, AT2G30070, AT4G13420, AT4G33530, AT5G09400, AT5G14880, AT1G70300, AT4G19960, AT2G35060
TraesCS2B02G306600	M1		Zinc finger, RING-type	AT1G79110, AT3G12920, AT2G12290, AT4G19700, AT5G45100, AT4G35070
TraesCS2B02G307900	M1			AT5G49100, AT3G06868
TraesCS2B02G308500	M1	Arogenate dehydratase [Source:UniProtKB/TrEMBL;Acc:W5BE72]	Prephenate dehydratase	AT5G22630, AT3G44720, AT1G08250, AT1G11790, AT3G07630, AT2G27820
TraesCS2B02G308900	M1		Cytochrome P450	AT3G10570, AT1G64930, AT1G64950, AT5G61320, AT5G04660, AT1G64940, AT1G11600, AT2G12190, AT3G10560, AT1G64900, AT3G03470, AT5G04630
TraesCS2B02G309600	M1		Calcineurin-like phosphoesterase domain, ApaH type	AT3G09960, AT3G09970
TraesCS2B02G311100	M1	Ferredoxin [Source:UniProtKB/TrEMBL;Acc:A0A1D5TW47]	2Fe-2S ferredoxin-type iron-sulfur binding domain	AT1G60950, AT1G10960, AT5G10000, AT2G27510
TraesCS2B02G313500	M1		Domain of unknown function DUF1279	AT2G27290
TraesCS2B02G313700	M1		Alkyl hydroperoxide reductase subunit C/ Thiol specific antioxidant	AT3G11630, AT5G06290
TraesCS2B02G313900	M1		Late embryogenesis abundant protein, LEA_2 subgroup	AT3G52470, AT5G05657, AT2G35960, AT4G01410, AT3G44220, AT5G22200, AT5G53730, AT5G06330, AT3G11660, AT4G09590, AT2G35970
TraesCS2B02G315500	M1	Histone H3.2 [Source:UniProtKB/Swiss-Prot;Acc:P68428]	Histone H3/CENP-A	AT1G19890, AT4G40030, AT4G40040, AT1G75600, AT5G12910, AT5G10400, AT1G01370, AT1G09200, AT5G10980, AT5G10390, AT1G13370, AT5G65350, AT5G65360, AT3G27360
TraesCS2B02G317000	M1		FAD-binding domain	AT2G35660, AT4G15765, AT5G05320, AT4G38540, AT4G15760, AT2G29720
TraesCS2B02G319600	M1		Late embryogenesis abundant protein, LEA_2 subgroup	AT5G42860, AT4G35170, AT2G41990, AT3G24600, AT1G45688, AT3G24605
TraesCS2B02G323000	M1
TraesCS2B02G323100	M1		Regulator of chromosome condensation, RCC1	AT5G63860
TraesCS2B02G328200	M1		NADH:flavin oxidoreductase/NADH oxidase, N-terminal	AT1G76690, AT1G09400, AT1G18020, AT2G06050, AT1G76680, AT1G17990
TraesCS2B02G329300	M1	Histone H2B [Source:UniProtKB/TrEMBL;Acc:W5BFB4]	Histone H2B	AT1G07790, AT5G22880, AT5G02570, AT3G45980, AT5G59910, AT3G09480, AT3G53650, AT3G46030, AT2G28720, AT2G37470
TraesCS2B02G329600	M1		FAD-binding 8	AT5G23990, AT5G49740, AT5G49730, AT1G23020, AT5G23980, AT1G01590, AT1G01580, AT5G50160
TraesCS2B02G330100	M1		Domain of unknown function DUF861, cupin-3	AT4G10280, AT4G10290, AT4G28703, AT4G10300, AT3G04300
TraesCS2B02G330200	M1		Pectinesterase inhibitor domain
TraesCS2B02G337500	M1	Glycosyltransferase [Source:UniProtKB/TrEMBL;Acc:A0A1D5TZH2]	UDP-glucuronosyl/UDP-glucosyltransferase	AT5G05880, AT5G05900, AT1G22370, AT1G22340, AT3G11340, AT2G26480, AT3G46680, AT5G05870, AT5G59590, AT1G78270, AT3G55710, AT2G28080, AT5G59580, AT3G46690, AT2G36970, AT5G05860, AT1G22380, AT3G46670, AT3G46700, AT5G37950, AT1G22400, AT5G38040, AT3G46660, AT1G22360, AT3G46650, AT3G55700, AT5G38010, AT3G46720, AT5G05890
TraesCS2B02G340300	M1	Chlorophyll a-b binding protein, chloroplastic [Source:UniProtKB/TrEMBL;Acc:W5AY52]	Chlorophyll A-B binding protein, plant	AT1G15820
TraesCS2B02G340500	M1		Gamma-glutamyltranspeptidase	AT4G39640, AT4G29210, AT4G39650, AT1G69820
TraesCS2B02G340600	M1		EPIDERMAL PATTERNING FACTOR-like protein	AT1G34245, AT1G71866, AT2G20875
TraesCS2B02G341300	M1	Aldose 1-epimerase [Source:UniProtKB/TrEMBL;Acc:A0A1D5U2V9]	Aldose 1-/Glucose-6-phosphate 1-epimerase	AT5G15140, AT3G17940, AT3G47800, AT3G01260
TraesCS2B02G341400	M1	Aldose 1-epimerase [Source:UniProtKB/TrEMBL;Acc:A0A1D5U2W1]	Aldose 1-/Glucose-6-phosphate 1-epimerase	AT5G15140, AT3G17940, AT3G47800, AT3G01260
TraesCS2B02G342000	M1		Oxygen-evolving enhancer protein 3	AT3G01440
TraesCS2B02G342200	M1	Glyceraldehyde-3-phosphate dehydrogenase [Source:UniProtKB/TrEMBL;Acc:A0A1D5TTT2]	Glyceraldehyde-3-phosphate dehydrogenase, type I	AT1G12900, AT1G42970, AT3G26650
TraesCS2B02G343400	M1			AT3G29034
TraesCS2B02G343600	M1		NAC domain	AT3G17730, AT4G36160, AT5G04395, AT3G29035, AT1G62700, AT5G24590, AT5G17260, AT5G64060, AT3G61910, AT1G52880, AT3G15510, AT1G32770, AT5G04410, AT4G10350, AT5G13180, AT2G46770, AT5G66300, AT3G04070, AT4G27410, AT1G12260, AT2G27300, AT5G07680, AT5G53950, AT3G10480, AT1G76420, AT2G33480, AT3G49530, AT3G10500, AT3G10490, AT1G79580, AT3G12977, AT1G01720, AT5G18270, AT1G52890, AT2G24430, AT1G54330, AT5…
TraesCS2B02G343800	M1		SANT/Myb domain	AT5G57620, AT5G11050, AT5G65230, AT4G26930, AT5G52260, AT4G37780, AT5G61420, AT5G07690, AT5G56110, AT3G48920, AT4G05100, AT3G13890, AT5G40360, AT5G60890, AT1G34670, AT5G55020, AT1G18570, AT2G47460, AT3G61250, AT1G16490, AT3G27920, AT5G14340, AT4G09460, AT5G14750, AT2G32460, AT3G01140, AT1G09540, AT1G57560, AT3G13540, AT1G66390, AT3G28470, AT1G35515, AT3G08500, AT3G47600, AT4G28110, AT3G12820, AT1…
TraesCS2B02G344100	M1		PLAC8 motif-containing protein	AT5G35525, AT1G49030, AT3G18470, AT1G68610, AT1G52200, AT3G18460, AT1G14870, AT2G40935, AT3G18450, AT1G14880, AT1G68630, AT1G58320
TraesCS2B02G344800	M1		Prohibitin	AT3G27280, AT5G40770, AT5G14300
TraesCS2B02G346800	M1	Peroxidase [Source:UniProtKB/TrEMBL;Acc:A0A341QQ48]	Plant peroxidase	AT4G30170, AT5G47000, AT3G49960, AT5G14130, AT4G17690, AT2G18980, AT2G34060, AT5G40150, AT3G28200, AT1G24110, AT4G37520, AT4G37530, AT5G67400
TraesCS2B02G346900	M1		Gibberellin regulated protein	AT4G09610, AT2G18420, AT4G09600, AT1G22690, AT1G75750, AT5G14920
TraesCS2B02G352000	M1		PLC-like phosphodiesterase, TIM beta/alpha-barrel domain superfamily	AT1G66970, AT3G20520, AT5G58170, AT1G66980, AT5G58050, AT4G26690, AT5G55480
TraesCS2B02G354100	M1		Oxoglutarate/iron-dependent dioxygenase	AT1G14130, AT1G14120
TraesCS2B02G359000	M1		Oxoglutarate/iron-dependent dioxygenase	AT1G14130, AT1G14120
TraesCS2B02G359300	M1		Peptide methionine sulphoxide reductase MsrA	AT5G61640, AT5G07470, AT4G25130, AT5G07460
TraesCS2B02G359900	M1	Mitochondrial inner membrane protease ATP23 [Source:UniProtKB/TrEMBL;Acc:W5B9Q5]	Peptidase M76, ATP23	AT3G03420
TraesCS2B02G360500	M1			AT5G40500
TraesCS2B02G363300	M1	MAD2 [Source:UniProtKB/TrEMBL;Acc:Q5CD51]	HORMA domain	AT3G25980
TraesCS2B02G366400	M1		Ankyrin repeat	AT5G14230
TraesCS2B02G366900	M1		2-phosphoglycolate phosphatase, eukaryotic	AT5G36700, AT5G36790, AT5G47760
TraesCS2B02G367300	M1		B-box-type zinc finger	AT2G31380, AT1G06040, AT4G39070, AT1G75540, AT1G78600, AT4G10240
TraesCS2B02G367500	M1		EF-hand domain	AT3G07490, AT3G59440, AT1G05990, AT3G03410, AT2G41100, AT4G12860, AT2G43290, AT4G03290
TraesCS2B02G368100	M1	Mitochondrial pyruvate carrier [Source:UniProtKB/TrEMBL;Acc:W5BGP8]	Mitochondrial pyruvate carrier	AT5G20090
TraesCS2B02G370200	M1		DOMON domain	AT5G35735, AT3G25290, AT4G12980, AT3G61750, AT5G47530, AT3G59070, AT3G07570, AT4G17280, AT5G48750
TraesCS2B02G371000	M1		FAS1 domain	AT3G60900, AT2G45470, AT5G55730
TraesCS2B02G371300	M1			AT5G36710, AT5G16250, AT3G02640, AT5G36800
TraesCS2B02G372500	M1	Peroxidase [Source:UniProtKB/TrEMBL;Acc:W5B6M4]	Plant peroxidase	AT4G25980, AT1G77100, AT2G41480
TraesCS2B02G373000	M1	Peroxidase [Source:UniProtKB/TrEMBL;Acc:W5BH29]	Plant peroxidase	AT2G24800, AT4G31760
TraesCS2B02G373300	M1		Protein of unknown function DUF594	AT5G45530, AT5G45480, AT5G45470
TraesCS2B02G374600	M1		Transferase	AT5G48930
TraesCS2B02G377700	M1			AT4G15140
TraesCS2B02G378600	M1		Leucine-rich repeat domain superfamily	AT4G06744, AT3G19320, AT1G49750
TraesCS2B02G379300	M1	Glycosyltransferase [Source:UniProtKB/TrEMBL;Acc:W5B7J3]	UDP-glucuronosyl/UDP-glucosyltransferase	AT5G12890
TraesCS2B02G380600	M1		GDSL lipase/esterase	AT3G04290, AT5G18430, AT4G28780, AT5G33370
TraesCS2B02G386700	M1		Cytochrome b561/ferric reductase transmembrane	AT1G14730, AT5G38630, AT1G26100, AT4G25570
TraesCS2B02G392400	M1		GRAM domain	AT5G08350, AT5G23350, AT5G23370, AT5G23360
TraesCS2B02G393400	M1	ATP-dependent Clp protease proteolytic subunit [Source:UniProtKB/TrEMBL;Acc:A0A1D5TZX8]	ATP-dependent Clp protease proteolytic subunit	AT5G23140
TraesCS2B02G394300	M1	Pectin acetylesterase [Source:UniProtKB/TrEMBL;Acc:A0A341R2L6]	Pectinacetylesterase/NOTUM	AT3G05910, AT4G19410, AT1G09550, AT3G09410, AT3G09405, AT4G19420, AT3G62060, AT5G23870, AT5G45280, AT2G46930, AT1G57590, AT5G26670
TraesCS2B02G394800	M1		Protein RETICULATA-related	AT2G37860, AT5G22790
TraesCS2B02G395400	M1		Alpha/beta hydrolase fold-1	AT1G18360, AT2G47630, AT3G62860, AT1G11090, AT1G73480, AT5G19290, AT3G55180, AT2G39420, AT3G55190, AT5G14980, AT5G16120, AT2G39400, AT1G77420, AT5G11650, AT1G52760, AT2G39410
TraesCS2B02G397000	M1		Senescence regulator S40	AT3G15040, AT2G34340, AT4G18980, AT4G21930, AT4G04630, AT5G03230, AT1G61930, AT3G45210, AT1G11700, AT4G26950, AT1G29640, AT4G21970, AT2G28400, AT5G60680, AT5G45630
TraesCS2B02G397300	M1	Auxin response factor [Source:UniProtKB/TrEMBL;Acc:A0A1D6RL08]	PB1 domain	AT4G30080, AT1G77850, AT2G28350
TraesCS2B02G398400	M1	Phenylalanine ammonia-lyase [Source:UniProtKB/TrEMBL;Acc:W5B701]	Aromatic amino acid lyase	AT2G37040, AT5G04230, AT3G53260, AT3G10340
TraesCS2B02G399200	M1		SANT/Myb domain	AT5G57620, AT5G11050, AT5G65230, AT4G26930, AT5G52260, AT4G37780, AT5G61420, AT5G07690, AT5G56110, AT3G48920, AT4G05100, AT3G13890, AT5G40360, AT5G60890, AT1G34670, AT5G55020, AT1G18570, AT2G47460, AT3G61250, AT1G16490, AT3G27920, AT5G14340, AT4G09460, AT5G14750, AT2G32460, AT3G01140, AT1G09540, AT1G57560, AT3G13540, AT1G66390, AT3G28470, AT1G35515, AT3G08500, AT3G47600, AT4G28110, AT3G12820, AT1…
TraesCS2B02G399700	M1		NAC domain	AT4G28530
TraesCS2B02G401700	M1		Uncharacterized protein At4g13200-like	AT4G13200
TraesCS2B02G404700	M1		Ccc1 family	AT3G25190, AT1G21140, AT1G76800, AT3G43630, AT3G43660
TraesCS2B02G405600	M1		NAD(P)H-quinone oxidoreductase subunit M	AT4G37925
TraesCS2B02G406400	M1		Zinc finger, GATA-type	AT3G54810, AT5G26930, AT3G16870, AT3G60530, AT4G36620, AT3G50870, AT2G28340, AT5G66320, AT4G26150, AT4G36240, AT4G16141, AT3G24050, AT5G56860, AT1G08000, AT1G08010, AT4G32890, AT3G45170, AT2G45050, AT3G51080, AT2G18380, AT3G20750, AT5G49300, AT4G34680, AT3G06740, AT5G25830
TraesCS2B02G409300	M1	Glutamate dehydrogenase [Source:UniProtKB/TrEMBL;Acc:W5BS00]	Glutamate/phenylalanine/leucine/valine dehydrogenase	AT3G03910, AT5G07440, AT5G18170
TraesCS2B02G410700	M1
TraesCS2B02G411200	M1		Gnk2-homologous domain
TraesCS2B02G411600	M1	Histone H4 [Source:UniProtKB/TrEMBL;Acc:A0A077RYQ1]	Histone H4	AT1G07660, AT5G59970, AT3G46320, AT3G53730, AT3G45930, AT1G07820, AT2G28740, AT5G59690
TraesCS2B02G411800	M1			AT4G26288, AT5G56550, AT3G03170
TraesCS2B02G412600	M1			AT1G33055
TraesCS2B02G413200	M1		Zinc finger, RING-type	AT1G63840, AT3G43430, AT4G00305, AT5G41400, AT5G20885, AT4G11370, AT4G11360, AT3G61460
TraesCS2B02G413500	M1	Scarecrow-like protein 8 [Source:Projected from Arabidopsis thaliana (AT5G52510) UniProtKB/Swiss-Prot;Acc:Q9FYR7]	Transcription factor GRAS	AT5G52510
TraesCS2B02G414000	M1
TraesCS2B02G414500	M1	Beta-carotene hydroxylase B1 [Source:UniProtKB/TrEMBL;Acc:K7YGC2]	Fatty acid hydroxylase	AT4G25700, AT5G52570
TraesCS2B02G414800	M1		Aminotransferases, class-I, pyridoxal-phosphate-binding site	AT1G62960, AT4G37770, AT4G26200, AT2G22810, AT4G08040, AT5G65800, AT3G61510, AT3G49700, AT1G01480, AT4G11280, AT5G51690
TraesCS2B02G415000	M1		Ovate protein family, C-terminal	AT5G19650, AT2G36026, AT3G52525, AT1G06920, AT4G18830, AT5G01840, AT2G30400, AT5G22240, AT2G18500, AT5G58360
TraesCS2B02G415700	M1
TraesCS2B02G415800	M1		Linker histone H1/H5, domain H15	AT2G30620, AT2G18050, AT1G06760
TraesCS2B02G416900	M1	Subtilisin-like protease SBT1.3 [Source:Projected from Arabidopsis thaliana (AT5G51750) UniProtKB/Swiss-Prot;Acc:Q9FLI4]	Peptidase S8/S53 domain	AT4G10540, AT5G03620, AT5G59110, AT5G59120, AT4G21323, AT5G67360, AT1G66220, AT4G15040, AT5G45650, AT1G20160, AT4G10510, AT2G39850, AT3G46850, AT4G21640, AT3G46840, AT1G04110, AT4G10530, AT5G58830, AT5G59810, AT5G58840, AT5G58820, AT4G10520, AT4G00230, AT5G59090, AT4G26330, AT3G14067, AT1G01900, AT1G32980, AT2G04160, AT5G45640, AT1G32960, AT4G21630, AT5G67090, AT5G59100, AT3G14240, AT2G05920, AT4…
TraesCS2B02G417000	M1		Superoxide dismutase, copper/zinc binding domain	AT1G12520
TraesCS2B02G417100	M1		Glucose-methanol-choline oxidoreductase, N-terminal	AT3G56060, AT5G51930, AT1G14190, AT1G73050, AT1G12570, AT1G72970, AT1G14185, AT5G51950
TraesCS2B02G417300	M1		LysM domain	AT5G62150, AT4G25433, AT3G52790
TraesCS2B02G418100	M1		Thioesterase domain	AT3G61200
TraesCS2B02G419600	M1	Similar to Heat stress transcription factor Spl7 (Heat shock transcription factor) (Heat shock factor RHSF10) [Source: Projected from Oryza sativa (Os04g0568700)]	Heat shock factor (HSF)-type, DNA-binding	AT1G77570, AT3G24520, AT1G67970, AT5G45710, AT5G16820, AT4G13980, AT5G54070, AT4G18880, AT5G43840, AT1G32330, AT4G36990, AT3G51910, AT3G02990, AT4G19630, AT4G18870, AT1G46264, AT3G22830, AT4G11660, AT2G41690, AT5G03720, AT5G62020, AT4G17750, AT3G63350
TraesCS2B02G423200	M1		Glycoside hydrolase, family 28	AT5G44830, AT3G57510, AT3G07970, AT5G27530, AT4G32380, AT1G70500, AT1G23460, AT5G39910, AT4G35670, AT5G17200, AT3G15720, AT1G80140, AT1G80170, AT2G41850, AT4G32370, AT5G44840
TraesCS2B02G423300	M1		Glycoside hydrolase, family 28	AT5G44830, AT3G57510, AT3G07970, AT5G27530, AT4G32380, AT1G70500, AT1G23460, AT5G39910, AT4G35670, AT5G17200, AT3G15720, AT1G80140, AT1G80170, AT2G41850, AT4G32370, AT5G44840
TraesCS2B02G423900	M1		Multicopper oxidase, type 1	AT4G28090, AT5G66920, AT1G76160, AT1G21850, AT4G37160, AT4G38420, AT1G41830, AT2G23630, AT1G75790, AT4G22010, AT1G21860
TraesCS2B02G425600	M1	Plasma membrane intrinsic protein [Source:UniProtKB/TrEMBL;Acc:E6YBC7]	Major intrinsic protein	AT2G37170, AT3G61430, AT4G23400, AT2G39010, AT5G60660, AT4G00430, AT4G35100, AT3G54820, AT3G53420, AT2G16850, AT2G37180, AT1G01620, AT2G45960
TraesCS2B02G427500	M1
TraesCS2B02G432000	M1	Cyclin [Source:UniProtKB/TrEMBL;Acc:A0A1D5TW98]	Cyclin P/U	AT3G63120, AT5G61650, AT5G07450, AT2G45080, AT3G60550, AT3G05327, AT3G21870, AT2G44740
TraesCS2B02G432600	M1		Zinc finger, FYVE/PHD-type	AT3G60520, AT1G02070
TraesCS2B02G434100	M1		AP2/ERF domain	AT4G23750, AT3G15210, AT4G39780, AT5G43410, AT1G44830, AT2G36450, AT5G61890, AT2G31230, AT5G50080, AT4G34410, AT5G47220, AT2G44940, AT1G22810, AT4G16750, AT2G22200, AT1G71520, AT1G12980, AT1G33760, AT1G06160, AT3G57600, AT2G25820, AT5G18560, AT3G16770, AT4G31060, AT5G25190, AT1G22985, AT3G23230, AT1G24590, AT1G46768, AT5G53290, AT1G36060, AT2G35700, AT1G19210, AT3G14230, AT5G51190, AT1G01250, AT1…
TraesCS2B02G434700	M1
TraesCS2B02G435100	M1	Histone H4 variant TH011 [Source:UniProtKB/Swiss-Prot;Acc:P62785]	Histone H4	AT1G07660, AT5G59970, AT3G46320, AT3G53730, AT3G45930, AT1G07820, AT2G28740, AT5G59690
TraesCS2B02G436300	M1		AP2/ERF domain	AT4G23750, AT3G15210, AT4G39780, AT5G43410, AT1G44830, AT2G36450, AT5G61890, AT2G31230, AT5G50080, AT4G34410, AT5G47220, AT2G44940, AT1G22810, AT4G16750, AT2G22200, AT1G71520, AT1G12980, AT1G33760, AT1G06160, AT3G57600, AT2G25820, AT5G18560, AT3G16770, AT4G31060, AT5G25190, AT1G22985, AT3G23230, AT1G24590, AT1G46768, AT5G53290, AT1G36060, AT2G35700, AT1G19210, AT3G14230, AT5G51190, AT1G01250, AT1…
TraesCS2B02G436500	M1	Histone H4 variant TH011 [Source:UniProtKB/Swiss-Prot;Acc:P62785]	Histone H4	AT1G07660, AT5G59970, AT3G46320, AT3G53730, AT3G45930, AT1G07820, AT2G28740, AT5G59690
TraesCS2B02G442500	M1		Armadillo	AT5G50900
TraesCS2B02G443500	M1		Pectin lyase fold/virulence factor	AT4G20040, AT4G20050
TraesCS2B02G443800	M1	Zinc transporter, Preferential distribution of Zn to developing tissue [Source: Projected from Oryza sativa (Os04g0613000)]	Zinc/iron permease	AT1G05300, AT4G19690, AT3G12750, AT5G62160, AT4G19680, AT4G33020, AT1G60960, AT2G04032, AT1G10970, AT1G31260, AT2G32270, AT2G30080
TraesCS2B02G444200	M1		Alcohol dehydrogenase, zinc-type, conserved site	AT4G37990, AT1G72680, AT4G37980, AT4G37970, AT4G39330, AT3G19450, AT2G21730, AT4G34230, AT2G21890
TraesCS2B02G444500	M1		Bifunctional inhibitor/plant lipid transfer protein/seed storage helical domain	AT4G22460, AT4G12480, AT4G12520, AT5G46900, AT1G62500, AT4G12490, AT4G12500, AT1G62510, AT3G22120, AT4G12530, AT2G10940, AT4G00165, AT4G12470, AT4G12550, AT4G22513, AT5G46890, AT4G22490, AT2G45180, AT4G15160, AT1G12100, AT4G12510, AT4G12545, AT1G12090, AT3G22142
TraesCS2B02G446300	M1		Transferase	AT3G23840, AT4G24510, AT4G13840
TraesCS2B02G448100	M1		AP2/ERF domain	AT4G23750, AT3G15210, AT4G39780, AT5G43410, AT1G44830, AT2G36450, AT5G61890, AT2G31230, AT5G50080, AT4G34410, AT5G47220, AT2G44940, AT1G22810, AT4G16750, AT2G22200, AT1G71520, AT1G12980, AT1G33760, AT1G06160, AT3G57600, AT2G25820, AT5G18560, AT3G16770, AT4G31060, AT5G25190, AT1G22985, AT3G23230, AT1G24590, AT1G46768, AT5G53290, AT1G36060, AT2G35700, AT1G19210, AT3G14230, AT5G51190, AT1G01250, AT1…
TraesCS2B02G451100	M1	GalAK [Source:Projected from Arabidopsis thaliana (AT3G10700) UniProtKB/TrEMBL;Acc:A0A178V5L4]	Galactokinase	AT3G10700
TraesCS2B02G451600	M1		Cation transporter	AT4G10310
TraesCS2B02G453800	M1			AT5G57123, AT5G10695, AT4G29905
TraesCS2B02G454200	M1		Peptidyl-tRNA hydrolase, PTH2	AT5G10700
TraesCS2B02G454300	M1		WRKY domain	AT4G31550, AT2G23320, AT2G30590, AT2G24570, AT3G04670, AT5G28650, AT4G24240
TraesCS2B02G456900	M1			AT3G26960, AT5G13140, AT5G41050
TraesCS2B02G457000	M1	Pectin acetylesterase [Source:UniProtKB/TrEMBL;Acc:A0A1D5U1J0]	Pectinacetylesterase/NOTUM	AT3G05910, AT4G19410, AT1G09550, AT3G09410, AT3G09405, AT4G19420, AT3G62060, AT5G23870, AT5G45280, AT2G46930, AT1G57590, AT5G26670
TraesCS2B02G457600	M1	ascorbate peroxidase 4 [Source:Projected from Arabidopsis thaliana (AT4G09010) TAIR;Acc:AT4G09010]	Haem peroxidase	AT4G09010
TraesCS2B02G458100	M1		EF-hand domain	AT1G64850
TraesCS2B02G459100	M1	Ubiquinol oxidase [Source:UniProtKB/TrEMBL;Acc:A0A341QU26]	Alternative oxidase	AT5G64210, AT3G27620, AT1G32350, AT3G22360, AT3G22370
TraesCS2B02G463300	M1		Bax inhibitor 1-related	AT1G03070, AT3G63310, AT4G14730, AT4G15470, AT4G02690
TraesCS2B02G466500	M1		SANT/Myb domain	AT5G57620, AT5G11050, AT5G65230, AT4G26930, AT5G52260, AT4G37780, AT5G61420, AT5G07690, AT5G56110, AT3G48920, AT4G05100, AT3G13890, AT5G40360, AT5G60890, AT1G34670, AT5G55020, AT1G18570, AT2G47460, AT3G61250, AT1G16490, AT3G27920, AT5G14340, AT4G09460, AT5G14750, AT2G32460, AT3G01140, AT1G09540, AT1G57560, AT3G13540, AT1G66390, AT3G28470, AT1G35515, AT3G08500, AT3G47600, AT4G28110, AT3G12820, AT1…
TraesCS2B02G471000	M1		Bifunctional inhibitor/plant lipid transfer protein/seed storage helical domain	AT4G30880
TraesCS2B02G471300	M1			AT4G30880
TraesCS2B02G474700	M1		Zf-FLZ domain	AT1G53903, AT5G47060, AT4G17670, AT5G49120, AT1G19200, AT1G22160, AT4G39795, AT1G78020, AT5G65040, AT1G74940, AT1G53885, AT5G20700, AT2G44670
TraesCS2B02G474800	M1		Zf-FLZ domain	AT1G53903, AT5G47060, AT4G17670, AT5G49120, AT1G19200, AT1G22160, AT4G39795, AT1G78020, AT5G65040, AT1G74940, AT1G53885, AT5G20700, AT2G44670
TraesCS2B02G474900	M1		Zf-FLZ domain	AT1G53903, AT5G47060, AT4G17670, AT5G49120, AT1G19200, AT1G22160, AT4G39795, AT1G78020, AT5G65040, AT1G74940, AT1G53885, AT5G20700, AT2G44670
TraesCS2B02G475800	M1		Zf-FLZ domain	AT1G53903, AT5G47060, AT4G17670, AT5G49120, AT1G19200, AT1G22160, AT4G39795, AT1G78020, AT5G65040, AT1G74940, AT1G53885, AT5G20700, AT2G44670
TraesCS2B02G476400	M1		Zf-FLZ domain	AT1G53903, AT5G47060, AT4G17670, AT5G49120, AT1G19200, AT1G22160, AT4G39795, AT1G78020, AT5G65040, AT1G74940, AT1G53885, AT5G20700, AT2G44670
TraesCS2B02G478300	M1	RING-type E3 ubiquitin transferase [Source:UniProtKB/TrEMBL;Acc:W5BFR3]	U box domain	AT1G29340
TraesCS2B02G480100	M1		C2 domain
TraesCS2B02G480500	M1		Ubiquitin-like domain	AT1G23410, AT1G65350, AT4G05050, AT1G11980, AT3G52590, AT3G62250, AT2G35635, AT1G55060, AT1G53950, AT2G36170, AT5G37640, AT3G09790, AT1G31340, AT5G03240, AT2G47110, AT4G02890, AT5G20620, AT4G05320, AT1G53930, AT1G53945
TraesCS2B02G480600	M1		Ubiquitin-like domain	AT1G23410, AT1G65350, AT4G05050, AT1G11980, AT3G52590, AT3G62250, AT2G35635, AT1G55060, AT1G53950, AT2G36170, AT5G37640, AT3G09790, AT1G31340, AT5G03240, AT2G47110, AT4G02890, AT5G20620, AT4G05320, AT1G53930, AT1G53945
TraesCS2B02G480800	M1			AT1G16500, AT1G79160
TraesCS2B02G484600	M1		CTAG/Pcc1 family	AT5G53045
TraesCS2B02G484900	M1
TraesCS2B02G486800	M1
TraesCS2B02G487800	M1		B3 DNA binding domain	AT4G00580, AT2G24645, AT4G00260, AT2G01800, AT2G24696, AT2G24690, AT4G31615, AT2G24700, AT4G31630, AT2G24680, AT4G31680, AT4G31660, AT4G31690, AT4G00920, AT4G31685, AT4G31610, AT5G32460, AT1G56100, AT1G55865, AT4G31650, AT4G31620, AT2G24650, AT4G31640, AT2G24681, AT1G30060, AT1G26680, AT2G02770
TraesCS2B02G489900	M1	FD-like 15 protein [Source:UniProtKB/TrEMBL;Acc:B4Y1F0]	Basic-leucine zipper domain	AT4G35900, AT2G17770
TraesCS2B02G490400	M1		Pectinesterase inhibitor domain
TraesCS2B02G490800	M1	Signal recognition particle 14 kDa protein [Source:Projected from Arabidopsis thaliana (AT2G43640) UniProtKB/Swiss-Prot;Acc:O04421]	Signal recognition particle, SRP14 subunit	AT2G43640
TraesCS2B02G490900	M1	Aminomethyltransferase [Source:UniProtKB/TrEMBL;Acc:A0A341QZM8]	Aminomethyltransferase, folate-binding domain	AT1G11860
TraesCS2B02G492300	M1	Histone H4 variant TH011 [Source:UniProtKB/Swiss-Prot;Acc:P62785]	Histone H4	AT1G07660, AT5G59970, AT3G46320, AT3G53730, AT3G45930, AT1G07820, AT2G28740, AT5G59690
TraesCS2B02G495400	M1		BTB/POZ domain	AT2G39760, AT5G19000, AT3G06190, AT3G03740, AT3G43700, AT5G21010
TraesCS2B02G496600	M1		Lipocalin/cytosolic fatty-acid binding domain	AT3G47860
TraesCS2B02G501000	M1		Plant lipid transfer protein/Par allergen	AT3G08770, AT2G18370, AT3G51600, AT2G15050, AT2G38530, AT2G15325, AT5G59310, AT4G33355, AT5G59320, AT2G38540, AT5G01870, AT3G51590, AT5G59330
TraesCS2B02G507200	M1			AT4G28290
TraesCS2B02G507700	M1		NAD-dependent epimerase/dehydratase	AT1G61720
TraesCS2B02G510200	M1		Glycoside hydrolase family 16	AT2G18800, AT1G11545, AT5G57560, AT2G06850, AT4G30280, AT5G65730, AT5G13870, AT1G65310, AT3G23730, AT4G30290, AT5G57540, AT5G48070, AT4G14130, AT5G57530, AT5G57550, AT4G30270, AT4G37800, AT4G28850, AT4G03210, AT4G25820, AT4G25810
TraesCS2B02G512700	M1		Transcription factor TGA like domain	AT1G09950, AT4G18650
TraesCS2B02G513800	M1		Protein of unknown function wound-induced	AT4G10265, AT4G10270, AT4G33560
TraesCS2B02G513900	M1		Protein of unknown function wound-induced	AT4G10265, AT4G10270, AT4G33560
TraesCS2B02G516500	M1			AT5G03050
TraesCS2B02G524500	M1	MOT2 [Source:Projected from Arabidopsis thaliana (AT1G80310) UniProtKB/TrEMBL;Acc:A0A178WGR3]	Molybdate transporter 1/2	AT1G80310, AT2G25680
TraesCS2B02G528300	M1	Glutamine synthetase [Source:UniProtKB/TrEMBL;Acc:A0A1D5TVU1]	Glutamine synthetase, catalytic domain	AT5G16570, AT3G17820, AT1G48470, AT5G37600, AT1G66200, AT5G35630
TraesCS2B02G529400	M1	C2 domain-containing protein [Source:UniProtKB/TrEMBL;Acc:G8XUN9]	C2 domain	AT5G37740, AT2G01540, AT1G48590, AT3G17980, AT1G70790, AT1G66360, AT1G23140, AT1G73580, AT1G70800, AT1G70810
TraesCS2B02G530200	M1	Peroxidase [Source:UniProtKB/TrEMBL;Acc:W5B6C4]	Plant peroxidase	AT4G30170, AT5G47000, AT3G49960, AT5G14130, AT4G17690, AT2G18980, AT2G34060, AT5G40150, AT3G28200, AT1G24110, AT4G37520, AT4G37530, AT5G67400, AT1G71695
TraesCS2B02G532600	M1		Glutathione S-transferase, N-terminal	AT1G78360, AT1G59700, AT1G78380, AT1G78370, AT1G78320, AT1G10360, AT1G59670, AT1G17190, AT2G29440, AT1G17170, AT1G27130, AT3G43800, AT1G10370, AT2G29460, AT3G09270, AT2G29490, AT2G29420, AT2G29470, AT1G69920, AT5G62480, AT1G17180, AT2G29450, AT1G27140, AT1G53680, AT2G29480, AT1G69930, AT1G78340, AT1G74590
TraesCS2B02G532900	M1		Protein kinase domain	AT5G57670, AT2G18890, AT5G35960, AT5G10520, AT3G05140, AT5G65530, AT5G18910, AT1G71830
TraesCS2B02G539600	M1	Glycosyltransferases [Source:UniProtKB/TrEMBL;Acc:A0A1D5TXX0]	Glycosyl transferase, family 43	AT5G67230, AT4G36890
TraesCS2B02G540400	M1		Protein kinase domain	AT1G10850, AT5G67200, AT5G43020, AT1G60630, AT3G50230
TraesCS2B02G541400	M1
TraesCS2B02G542300	M1		AP2/ERF domain	AT4G23750, AT3G15210, AT4G39780, AT5G43410, AT1G44830, AT2G36450, AT5G61890, AT2G31230, AT5G50080, AT4G34410, AT5G47220, AT2G44940, AT1G22810, AT4G16750, AT2G22200, AT1G71520, AT1G12980, AT1G33760, AT1G06160, AT3G57600, AT2G25820, AT5G18560, AT3G16770, AT4G31060, AT5G25190, AT1G22985, AT3G23230, AT1G24590, AT1G46768, AT5G53290, AT1G36060, AT2G35700, AT1G19210, AT3G14230, AT5G51190, AT1G01250, AT1…
TraesCS2B02G544300	M1
TraesCS2B02G544400	M1
TraesCS2B02G546500	M1		Serine aminopeptidase, S33	AT4G12830, AT1G52510
TraesCS2B02G549400	M1		3-oxoacyl-[acyl-carrier-protein] synthase 3	AT1G62640
TraesCS2B02G550700	M1		ABC transporter-like	AT4G01830, AT3G62150, AT1G02530, AT1G02520, AT4G18050, AT3G28360, AT3G28860, AT3G28390, AT1G10680, AT2G47000, AT5G46540, AT2G36910, AT4G01820, AT1G27940, AT3G28345, AT1G28010, AT3G28415, AT3G28380, AT4G25960
TraesCS2B02G553100	M1		Glycoside hydrolase, family 3, N-terminal	AT5G10560, AT5G09700, AT5G64570, AT5G49360, AT1G78060, AT3G19620, AT5G09730, AT1G02640
TraesCS2B02G553600	M1	SEP2 [Source:Projected from Arabidopsis thaliana (AT2G21970) UniProtKB/TrEMBL;Acc:A0A178VQ84]	Chlorophyll A-B binding protein	AT2G21970
TraesCS2B02G554800	M1
TraesCS2B02G559800	M1		Protein of unknown function wound-induced	AT4G10265, AT4G10270, AT4G33560
TraesCS2B02G560900	M1		Protein of unknown function wound-induced	AT4G10265, AT4G10270, AT4G33560
TraesCS2B02G561100	M1		Protein of unknown function wound-induced	AT4G10265, AT4G10270, AT4G33560
TraesCS2B02G561200	M1		Protein of unknown function wound-induced	AT4G10265, AT4G10270, AT4G33560
TraesCS2B02G561300	M1		Protein of unknown function wound-induced	AT4G10265, AT4G10270, AT4G33560
TraesCS2B02G561400	M1		Protein of unknown function wound-induced	AT4G10265, AT4G10270, AT4G33560
TraesCS2B02G561700	M1		Protein of unknown function wound-induced
TraesCS2B02G561900	M1		Protein of unknown function wound-induced
TraesCS2B02G562100	M1	Serine/threonine-protein kinase [Source:UniProtKB/TrEMBL;Acc:W5BHT0]	Protein kinase domain	AT4G23240, AT4G23230, AT4G11490, AT1G61380, AT4G04490, AT1G61460, AT1G67520, AT1G11280, AT4G23260, AT4G27290, AT4G21400, AT4G23140, AT4G23190, AT4G21410, AT4G23130, AT4G27300, AT4G00970, AT4G11530, AT4G28670, AT1G11330, AT4G11460, AT1G11410, AT4G21366, AT4G05200, AT4G11470, AT1G61490, AT1G61500, AT4G23250, AT1G61420, AT1G11300, AT1G61550, AT2G01780, AT1G70520, AT5G39370, AT3G12000, AT3G45860, AT4…
TraesCS2B02G569600	M1		Heavy metal-associated domain superfamily	AT5G23760, AT5G52740, AT1G01490
TraesCS2B02G571500	M1	Exocyst subunit Exo70 family protein [Source:UniProtKB/TrEMBL;Acc:A0A1D5U0C7]	Exocyst complex component Exo70	AT5G50380
TraesCS2B02G572700	M1			AT5G13090, AT1G12020, AT1G24270, AT1G62422
TraesCS2B02G572800	M1		Phospholipase/carboxylesterase/thioesterase	AT4G22300, AT4G22305, AT1G18773
TraesCS2B02G576800	M1	RBR-type E3 ubiquitin transferase [Source:UniProtKB/TrEMBL;Acc:A0A1D5TU60]	Zinc finger, RING-type	AT3G14250, AT3G53690
TraesCS2B02G579700	M1		Myb-like domain	AT2G35640, AT1G31310
TraesCS2B02G581900	M1		Barwin domain	AT3G04720
TraesCS2B02G582000	M1		Barwin domain	AT3G04720
TraesCS2B02G582300	M1	A-type response regulator, Cytokinin signalin [Source: Projected from Oryza sativa (Os04g0673300)]	Signal transduction response regulator, receiver domain	AT2G41310, AT1G19050, AT2G07440, AT3G48100, AT2G40670, AT1G59940, AT5G62920, AT1G10470, AT3G56380, AT1G74890, AT3G57040
TraesCS2B02G587900	M1	Glycosyltransferase (Fragment) [Source:Projected from Arabidopsis thaliana (AT1G34130) UniProtKB/TrEMBL;Acc:W8PVA0]	Oligosaccharyl transferase, STT3 subunit	AT1G34130, AT5G19690
TraesCS2B02G588200	M1
TraesCS2B02G590200	M1		Aspartic peptidase A1 family	AT4G30040, AT1G79720, AT5G07030, AT4G12920, AT5G24820, AT1G25510, AT3G61820, AT2G28010, AT2G42980, AT3G18490, AT5G10760, AT2G28030, AT1G09750, AT2G03200, AT4G30030, AT3G59080, AT2G23945, AT2G28225, AT3G54400, AT3G20015, AT5G10770, AT1G01300, AT2G28040, AT2G28220
TraesCS2B02G592000	M1		Modifying wall lignin-1/2	AT1G52910, AT4G27435, AT1G61065, AT3G15480, AT1G68220, AT1G13380
TraesCS2B02G592400	M1		Cytochrome P450	AT5G07990
TraesCS2B02G592700	M1		Zinc finger, Dof-type	AT3G61850, AT3G55370, AT3G52440, AT2G37590, AT2G28810, AT4G24060, AT1G29160, AT1G21340, AT5G02460, AT1G51700, AT4G21050, AT1G07640, AT5G39660, AT4G00940, AT3G21270, AT5G65590, AT4G21030, AT1G26790, AT4G38000, AT1G28310, AT3G45610, AT5G62430, AT1G47655, AT2G46590, AT5G66940, AT1G69570, AT2G28510, AT5G60850, AT5G62940, AT1G64620, AT5G60200, AT3G50410, AT2G34140, AT4G21040, AT4G21080, AT3G47500
TraesCS2B02G592800	M1		Zinc finger, Dof-type	AT3G61850, AT3G55370, AT3G52440, AT2G37590, AT2G28810, AT4G24060, AT1G29160, AT1G21340, AT5G02460, AT1G51700, AT4G21050, AT1G07640, AT5G39660, AT4G00940, AT3G21270, AT5G65590, AT4G21030, AT1G26790, AT4G38000, AT1G28310, AT3G45610, AT5G62430, AT1G47655, AT2G46590, AT5G66940, AT1G69570, AT2G28510, AT5G60850, AT5G62940, AT1G64620, AT5G60200, AT3G50410, AT2G34140, AT4G21040, AT4G21080, AT3G47500
TraesCS2B02G592900	M1		Zinc finger, Dof-type	AT3G61850, AT3G55370, AT3G52440, AT2G37590, AT2G28810, AT4G24060, AT1G29160, AT1G21340, AT5G02460, AT1G51700, AT4G21050, AT1G07640, AT5G39660, AT4G00940, AT3G21270, AT5G65590, AT4G21030, AT1G26790, AT4G38000, AT1G28310, AT3G45610, AT5G62430, AT1G47655, AT2G46590, AT5G66940, AT1G69570, AT2G28510, AT5G60850, AT5G62940, AT1G64620, AT5G60200, AT3G50410, AT2G34140, AT4G21040, AT4G21080, AT3G47500
TraesCS2B02G594300	M1		Rapid ALkalinization Factor	AT4G13950, AT3G16570, AT2G33775, AT1G02900, AT3G23805, AT4G15800, AT1G28270, AT2G20660, AT3G05490
TraesCS2B02G595400	M1			AT4G21720
TraesCS2B02G596500	M1	Mevalonate kinase [Source:UniProtKB/TrEMBL;Acc:W5B8Y5]	GHMP kinase, ATP-binding, conserved site	AT5G27450
TraesCS2B02G597400	M1		Choline transporter-like	AT3G15380
TraesCS2B02G602100	M1	Nudix hydrolase 26, chloroplastic [Source:Projected from Arabidopsis thaliana (AT3G10620) UniProtKB/Swiss-Prot;Acc:Q9CAF2]	NUDIX hydrolase domain	AT1G30110, AT3G10620, AT5G06340
TraesCS2B02G602700	M1
TraesCS2B02G603000	M1		Late embryogenesis abundant protein, LEA_2 subgroup	AT3G52470, AT5G05657, AT2G35960, AT4G01410, AT3G44220, AT5G22200, AT5G53730, AT5G06330, AT3G11660, AT4G09590, AT2G35970
TraesCS2B02G603200	M1		Late embryogenesis abundant protein, LEA_2 subgroup	AT2G35460, AT3G11650, AT5G06320, AT2G35980
TraesCS2B02G603500	M1		Aspartic peptidase A1 family	AT3G52500
TraesCS2B02G603600	M1		Ribonuclease CAF1	AT1G80780, AT5G10960, AT1G15920, AT2G32070, AT3G44260, AT5G22250
TraesCS2B02G603900	M1		Amidase, conserved site	AT1G08980, AT5G09420, AT3G17970
TraesCS2B02G604700	M1		PPC domain	AT3G61310
TraesCS2B02G608400	M1		Quinoprotein amine dehydrogenase, beta chain-like
TraesCS2B02G610300	M1	SKP1-interacting partner 15 [Source:Projected from Arabidopsis thaliana (AT1G76920) UniProtKB/Swiss-Prot;Acc:O49279]	F-box domain	AT1G76920
TraesCS2B02G614100	M1	Peroxidase [Source:UniProtKB/TrEMBL;Acc:W5B7B7]	Plant peroxidase	AT4G08780, AT4G33420, AT3G21770, AT4G08770, AT5G64110, AT2G38390, AT1G49570, AT1G14550, AT5G66390, AT5G15180, AT5G39580, AT5G06730, AT2G38380, AT2G22420, AT4G36430, AT4G26010, AT1G05260, AT1G44970, AT5G06720, AT2G39040, AT4G16270, AT3G49120, AT5G64100, AT1G71695, AT1G05240, AT3G42570, AT2G43480, AT3G32980, AT1G14540, AT5G51890, AT4G11290, AT1G34510, AT3G03670, AT5G58390, AT5G17820, AT1G68850, AT5…
TraesCS2B02G620700	M1	Tubulin-folding cofactor B [Source:Projected from Arabidopsis thaliana (AT3G10220) UniProtKB/Swiss-Prot;Acc:Q67Z52]	Ubiquitin-like domain	AT3G10220
TraesCS2B02G622500	M1		C2 domain	AT3G57880, AT5G48060, AT1G04150, AT3G03680, AT5G06850, AT4G00700, AT4G11610, AT3G61720, AT1G51570, AT5G17980, AT3G61300, AT5G12970, AT4G20080, AT5G03435, AT5G44760, AT1G22610, AT1G74720
TraesCS2D02G004200	M1		Zinc finger C2H2-type	AT5G54630, AT1G11490, AT1G75710, AT4G27240
TraesCS2D02G008200	M1			AT5G15320, AT3G01130
TraesCS2D02G010700	M1	Pyruvate dehydrogenase E1 component subunit alpha [Source:UniProtKB/TrEMBL;Acc:W5C3E3]	Dehydrogenase, E1 component	AT1G01090
TraesCS2D02G021300	M1	Glycosyltransferase [Source:UniProtKB/TrEMBL;Acc:A0A1D5UYP6]	UDP-glucuronosyl/UDP-glucosyltransferase	AT4G34135, AT3G53150, AT2G36790, AT4G34131, AT2G36750, AT2G15480, AT2G36760, AT2G36800, AT2G15490, AT2G36780, AT4G34138, AT2G36770, AT3G53160
TraesCS2D02G026900	M1		Amidase signature domain	AT4G34880
TraesCS2D02G030800	M1		UDP-glucuronosyl/UDP-glucosyltransferase	AT5G05880, AT5G05900, AT1G22370, AT1G22340, AT3G11340, AT2G26480, AT3G46680, AT5G05870, AT5G59590, AT1G78270, AT3G55710, AT2G28080, AT5G59580, AT3G46690, AT2G36970, AT5G05860, AT1G22380, AT3G46670, AT3G46700, AT5G37950, AT1G22400, AT5G38040, AT3G46660, AT1G22360, AT3G46650, AT3G55700, AT5G38010, AT3G46720, AT5G05890
TraesCS2D02G032000	M1		Sialate O-acetylesterase domain	AT4G34215, AT3G53010
TraesCS2D02G033100	M1	Chitinase 2 [Source:UniProtKB/TrEMBL;Acc:Q8W428]	Glycoside hydrolase, family 19, catalytic	AT4G01700, AT1G02360, AT3G12500
TraesCS2D02G033300	M1		NFD6/NOXY2-like	AT4G39300
TraesCS2D02G034300	M1		D-isomer specific 2-hydroxyacid dehydrogenase, catalytic domain	AT5G28310, AT1G79870, AT2G45630, AT1G12550
TraesCS2D02G035400	M1		Thiolase	AT5G48230, AT5G47720
TraesCS2D02G035700	M1		Ion channel regulatory protein, UNC-93	AT1G18010, AT1G18000
TraesCS2D02G037100	M1		FAD linked oxidase, N-terminal	AT5G11540, AT2G46760, AT5G56470, AT2G46740, AT2G46750, AT5G56490, AT1G32300
TraesCS2D02G037200	M1			AT1G63310
TraesCS2D02G037600	M1		Zinc finger, RING-CH-type	AT5G03180, AT5G18760, AT3G06330, AT5G60580, AT3G09760
TraesCS2D02G038300	M1		Nucleotide-diphospho-sugar transferase	AT4G15970, AT5G44820, AT4G19975, AT1G28700, AT2G02061, AT4G19970, AT1G28695, AT1G14590, AT5G40900, AT1G28710
TraesCS2D02G047500	M1		Methyltransferase type 11	AT3G61210, AT2G41380, AT3G54150, AT1G55450, AT4G22530, AT5G10830
TraesCS2D02G053300	M1		Protein kinase domain	AT1G34300
TraesCS2D02G057800	M1			AT2G20480, AT4G25315
TraesCS2D02G061000	M1			AT2G21140, AT4G38770
TraesCS2D02G061400	M1			AT2G21140, AT4G38770
TraesCS2D02G062000	M1		SANT/Myb domain	AT2G37025, AT1G72650
TraesCS2D02G063900	M1		Major intrinsic protein	AT2G37170, AT3G61430, AT4G23400, AT2G39010, AT5G60660, AT4G00430, AT4G35100, AT3G54820, AT3G53420, AT2G16850, AT2G37180, AT1G01620, AT2G45960
TraesCS2D02G065100	M1	Ribulose bisphosphate carboxylase small chain [Source:UniProtKB/TrEMBL;Acc:Q9FEE4]	Ribulose bisphosphate carboxylase small chain, domain	AT1G67090, AT5G38430, AT5G38410, AT5G38420
TraesCS2D02G065200	M1	Ribulose bisphosphate carboxylase small chain [Source:UniProtKB/TrEMBL;Acc:A0A1D5UUR8]	Ribulose bisphosphate carboxylase small chain, domain	AT1G67090, AT5G38430, AT5G38410, AT5G38420
TraesCS2D02G065300	M1	Ribulose bisphosphate carboxylase small chain [Source:UniProtKB/TrEMBL;Acc:A0A1D5UUS0]	Ribulose bisphosphate carboxylase small chain, domain	AT1G67090, AT5G38430, AT5G38410, AT5G38420
TraesCS2D02G065400	M1	Ribulose bisphosphate carboxylase small chain [Source:UniProtKB/TrEMBL;Acc:A0A1D5UUS1]	Ribulose bisphosphate carboxylase small chain, domain	AT1G67090, AT5G38430, AT5G38410, AT5G38420
TraesCS2D02G065600	M1	Ribulose bisphosphate carboxylase small chain [Source:UniProtKB/TrEMBL;Acc:W5C9Y4]	Ribulose bisphosphate carboxylase small chain, domain	AT1G67090, AT5G38430, AT5G38410, AT5G38420
TraesCS2D02G065700	M1			AT4G02800
TraesCS2D02G066000	M1		Thioredoxin-like superfamily	AT1G20225, AT1G76020
TraesCS2D02G067900	M1		Ribosomal protein L30, bacterial-type	AT5G55140
TraesCS2D02G068600	M1		Domain unknown function DUF295
TraesCS2D02G076300	M1		Six-bladed beta-propeller, TolB-like	AT1G74010, AT3G57030, AT5G22020, AT3G57020, AT1G74020, AT1G08470, AT1G74000, AT3G57010, AT2G41290, AT2G41300
TraesCS2D02G077300	M1		LPS-induced tumour necrosis factor alpha factor	AT5G13190
TraesCS2D02G078700	M1		UDP-glucuronosyl/UDP-glucosyltransferase	AT2G22930, AT1G50580, AT3G29630, AT4G27560, AT4G09500, AT5G54060, AT1G64920, AT4G27570, AT5G53990, AT5G54010, AT1G64910
TraesCS2D02G080000	M1	Ascorbate peroxidase, ROS homeostasis, Chloroplast protection, Carbohydrate metabolism, Plant architecture, Fertility maintenanc [Source: Projected from Oryza sativa (Os07g0694700)]	Haem peroxidase	AT3G09640, AT4G35970, AT4G35000, AT1G07890
TraesCS2D02G080500	M1	Glycosyltransferases [Source:UniProtKB/TrEMBL;Acc:A0A1D5V010]	Glycosyl transferase, family 43	AT2G37090
TraesCS2D02G082700	M1		Fatty acid desaturase domain	AT5G05580, AT2G29980, AT3G11170
TraesCS2D02G084200	M1		PMR5 N-terminal domain	AT2G40150, AT2G40160, AT3G55990
TraesCS2D02G085800	M1		NmrA-like domain	AT4G13660, AT1G75290, AT4G34540, AT1G32100, AT1G19540, AT1G75300, AT4G39230, AT1G75280
TraesCS2D02G086200	M1			AT4G31150
TraesCS2D02G088800	M1		Short-chain dehydrogenase/reductase SDR	AT3G42960, AT2G47120, AT3G26760, AT1G52340, AT3G29260, AT4G03140, AT3G51680, AT2G47140, AT3G26770, AT3G29250, AT2G47130, AT2G47150
TraesCS2D02G089000	M1		Short-chain dehydrogenase/reductase SDR	AT3G42960, AT2G47120, AT3G26760, AT1G52340, AT3G29260, AT4G03140, AT3G51680, AT2G47140, AT3G26770, AT3G29250, AT2G47130, AT2G47150
TraesCS2D02G090200	M1		Short-chain dehydrogenase/reductase SDR	AT3G42960, AT2G47120, AT3G26760, AT1G52340, AT3G29260, AT4G03140, AT3G51680, AT2G47140, AT3G26770, AT3G29250, AT2G47130, AT2G47150
TraesCS2D02G091300	M1		Wound-induced protein Wun1-like	AT5G01740, AT3G10985
TraesCS2D02G092100	M1		COBRA, plant	AT4G27110, AT4G16120, AT3G20580, AT5G49270, AT3G16860
TraesCS2D02G094200	M1	Nicotianamine synthase [Source:UniProtKB/TrEMBL;Acc:A0A172Q4F7]	Nicotianamine synthase	AT4G26483, AT5G04950, AT1G09240, AT1G56430, AT5G56080
TraesCS2D02G097500	M1	Calmodulin TaCaM1-1 [Source:UniProtKB/TrEMBL;Acc:Q7DMG9]	EF-hand domain	AT1G66410, AT3G43810, AT3G56800, AT5G21274, AT2G41110, AT4G14640, AT2G41090, AT2G27030, AT5G37780, AT3G22930
TraesCS2D02G097600	M1		Serine hydrolase FSH	AT5G65400, AT4G24380
TraesCS2D02G098000	M1		DAHP synthetase I/KDSA	AT1G16340, AT1G79500
TraesCS2D02G098900	M1		Peptidase S8/S53 domain	AT4G10540, AT5G03620, AT5G59110, AT5G59120, AT4G21323, AT5G67360, AT1G66220, AT4G15040, AT5G45650, AT1G20160, AT4G10510, AT2G39850, AT3G46850, AT4G21640, AT3G46840, AT1G04110, AT4G10530, AT5G58830, AT5G59810, AT5G58840, AT5G58820, AT4G10520, AT4G00230, AT5G59090, AT4G26330, AT3G14067, AT1G01900, AT1G32980, AT2G04160, AT5G45640, AT1G32960, AT4G21630, AT5G67090, AT5G59100, AT3G14240, AT2G05920, AT4…
TraesCS2D02G099200	M1		Peptidase S8/S53 domain	AT4G10540, AT5G03620, AT5G59110, AT5G59120, AT4G21323, AT5G67360, AT1G66220, AT4G15040, AT5G45650, AT1G20160, AT4G10510, AT2G39850, AT3G46850, AT4G21640, AT3G46840, AT1G04110, AT4G10530, AT5G58830, AT5G59810, AT5G58840, AT5G58820, AT4G10520, AT4G00230, AT5G59090, AT4G26330, AT3G14067, AT1G01900, AT1G32980, AT2G04160, AT5G45640, AT1G32960, AT4G21630, AT5G67090, AT5G59100, AT3G14240, AT2G05920, AT4…
TraesCS2D02G100600	M1		NAC domain	AT3G17730, AT4G36160, AT5G04395, AT3G29035, AT1G62700, AT5G24590, AT5G17260, AT5G64060, AT3G61910, AT1G52880, AT3G15510, AT1G32770, AT5G04410, AT4G10350, AT5G13180, AT2G46770, AT5G66300, AT3G04070, AT4G27410, AT1G12260, AT2G27300, AT5G07680, AT5G53950, AT3G10480, AT1G76420, AT2G33480, AT3G49530, AT3G10500, AT3G10490, AT1G79580, AT3G12977, AT1G01720, AT5G18270, AT1G52890, AT2G24430, AT1G54330, AT5…
TraesCS2D02G100700	M1		NAC domain	AT3G17730, AT4G36160, AT5G04395, AT3G29035, AT1G62700, AT5G24590, AT5G17260, AT5G64060, AT3G61910, AT1G52880, AT3G15510, AT1G32770, AT5G04410, AT4G10350, AT5G13180, AT2G46770, AT5G66300, AT3G04070, AT4G27410, AT1G12260, AT2G27300, AT5G07680, AT5G53950, AT3G10480, AT1G76420, AT2G33480, AT3G49530, AT3G10500, AT3G10490, AT1G79580, AT3G12977, AT1G01720, AT5G18270, AT1G52890, AT2G24430, AT1G54330, AT5…
TraesCS2D02G101100	M1		Ricin B-like lectins	AT2G39050
TraesCS2D02G102000	M1		Oxidoreductase FAD/NAD(P)-binding	AT1G15140
TraesCS2D02G103600	M1		Cytochrome P450	AT2G26710, AT4G27710, AT3G14690, AT3G14620, AT3G14640, AT5G24900, AT3G14610, AT3G14660, AT5G52400, AT3G14680, AT2G46960, AT5G38450, AT3G14650, AT1G67110, AT1G17060, AT3G14630, AT5G24910, AT1G75130, AT2G46950
TraesCS2D02G103800	M1		Protein kinase domain	AT5G05160, AT2G36570, AT3G08680, AT1G64210, AT5G41680, AT3G17840, AT4G23740, AT2G26730, AT3G02880, AT5G58300, AT1G48480, AT5G53320, AT5G16590
TraesCS2D02G104300	M1		Probable zinc-ribbon domain, plant	AT3G56410, AT5G05190
TraesCS2D02G105000	M1			AT2G40765
TraesCS2D02G105600	M1		Ovate protein family, C-terminal	AT5G19650, AT2G36026, AT3G52525, AT1G06920, AT4G18830, AT5G01840, AT2G30400, AT5G22240, AT2G18500, AT5G58360
TraesCS2D02G107100	M1		Protein kinase domain	AT4G30960, AT1G49180, AT2G30360, AT5G25110, AT5G07070, AT2G25090, AT2G38490, AT1G30270, AT3G61960, AT5G57630, AT3G53930, AT4G14580, AT5G21222, AT5G45810, AT5G01810, AT5G45820, AT4G18700, AT5G58380, AT5G21326, AT5G10930, AT2G34180, AT2G37840, AT1G29230, AT1G48260, AT4G24400, AT5G01820, AT5G35410, AT5G57565, AT3G17510, AT3G23000, AT2G26980, AT1G01140
TraesCS2D02G109800	M1	Pectinesterase [Source:UniProtKB/TrEMBL;Acc:A0A1D5UXI7]	Pectinesterase, catalytic	AT1G02810, AT5G53370, AT1G11590, AT3G43270, AT2G26440, AT5G04970, AT4G02320, AT3G62170, AT4G03930, AT4G00190, AT1G44980, AT2G47040, AT2G43050, AT4G33230, AT3G06830, AT2G47030, AT3G59010, AT4G15980, AT4G02330, AT5G51490, AT1G53840, AT2G45220, AT4G02300, AT3G14310, AT3G10710, AT5G09760, AT5G04960, AT4G33220, AT3G10720, AT3G60730, AT2G26450, AT3G05610, AT5G49180, AT3G27980, AT5G20860, AT3G47400, AT3…
TraesCS2D02G111400	M1		NAD(P)-binding domain	AT3G62830, AT2G28760, AT3G46440, AT3G53520, AT5G59290, AT2G47650
TraesCS2D02G112000	M1		Photosystem II PsbX	AT2G06520
TraesCS2D02G112300	M1		Universal stress protein A family	AT3G53990, AT5G49050, AT3G62550, AT3G11930, AT3G58450, AT3G17020, AT1G09740, AT3G03270, AT2G47710, AT3G25930, AT1G68300
TraesCS2D02G112900	M1		Universal stress protein A family	AT3G53990, AT5G49050, AT3G62550, AT3G11930, AT3G58450, AT3G17020, AT1G09740, AT3G03270, AT2G47710, AT3G25930, AT1G68300
TraesCS2D02G114800	M1		Rubber elongation factor	AT2G47780, AT1G67360, AT3G05500
TraesCS2D02G115100	M1	60S ribosome subunit biogenesis protein NIP7 homolog [Source:UniProtKB/TrEMBL;Acc:W5BKZ9]	PUA domain	AT4G15770
TraesCS2D02G115200	M1		Photosystem I reaction centre subunit N, chloroplastic	AT5G64040
TraesCS2D02G115700	M1		Heavy metal-associated domain, HMA	AT5G37860, AT1G66240, AT1G56210, AT5G27690, AT5G05365, AT3G56240, AT1G23000, AT3G06130, AT5G19090
TraesCS2D02G115900	M1	40S ribosomal protein S21 [Source:UniProtKB/TrEMBL;Acc:A0A0C4BJ86]	Ribosomal protein S21e	AT3G53890, AT5G27700
TraesCS2D02G117400	M1
TraesCS2D02G121900	M1
TraesCS2D02G122100	M1
TraesCS2D02G122300	M1
TraesCS2D02G124600	M1		Short-chain dehydrogenase/reductase SDR	AT3G42960, AT2G47120, AT3G26760, AT1G52340, AT3G29260, AT4G03140, AT3G51680, AT2G47140, AT3G26770, AT3G29250, AT2G47130, AT2G47150
TraesCS2D02G125500	M1
TraesCS2D02G125800	M1		Short-chain dehydrogenase/reductase SDR	AT3G42960, AT2G47120, AT3G26760, AT1G52340, AT3G29260, AT4G03140, AT3G51680, AT2G47140, AT3G26770, AT3G29250, AT2G47130, AT2G47150
TraesCS2D02G126400	M1		FAD linked oxidase, N-terminal	AT5G44440, AT4G20820, AT1G26380, AT1G01980, AT5G44390, AT4G20830, AT1G30740, AT1G30720, AT4G20860, AT4G20800, AT1G34575, AT1G30760, AT1G11770, AT1G30730, AT5G44380, AT1G30710, AT1G26420, AT5G44410, AT5G44400, AT1G26410, AT5G44360, AT1G26390, AT4G20840, AT2G34810, AT1G30700, AT2G34790, AT1G26400
TraesCS2D02G129500	M1		PAM2-containing protein CID1/CID2	AT4G14270, AT2G41430
TraesCS2D02G131100	M1
TraesCS2D02G133800	M1		Protein kinase domain	AT3G51740
TraesCS2D02G134700	M1		Glycosyltransferase 61	AT3G10320, AT2G41640, AT3G57380
TraesCS2D02G136100	M1		Uncharacterised protein family UPF0114	AT5G13720, AT4G19390
TraesCS2D02G136600	M1		Choline transporter-like	AT5G13760
TraesCS2D02G139400	M1		Heat shock protein DnaJ, cysteine-rich domain superfamily	AT2G38000
TraesCS2D02G145100	M1		Endonuclease/exonuclease/phosphatase	AT2G48030, AT3G21530
TraesCS2D02G145400	M1			AT5G19240, AT1G54860, AT3G06035, AT5G19250, AT5G19230
TraesCS2D02G146400	M1		Alpha/beta hydrolase fold-3	AT5G16080, AT1G47480, AT1G49660, AT1G49650, AT1G49640, AT3G48700, AT2G45600, AT2G45610, AT1G68620, AT1G19190, AT5G23530, AT5G06570, AT5G62180, AT3G48690, AT2G03550
TraesCS2D02G146500	M1		Lipase, GDXG, putative histidine active site	AT5G16080, AT1G47480, AT1G49660, AT1G49650, AT1G49640, AT3G48700, AT2G45600, AT2G45610, AT1G68620, AT1G19190, AT5G23530, AT5G06570, AT5G62180, AT3G48690, AT2G03550
TraesCS2D02G147100	M1		Lipase, GDXG, putative histidine active site	AT5G16080, AT1G47480, AT1G49660, AT1G49650, AT1G49640, AT3G48700, AT2G45600, AT2G45610, AT1G68620, AT1G19190, AT5G23530, AT5G06570, AT5G62180, AT3G48690, AT2G03550
TraesCS2D02G148200	M1	GAMMA CA2 [Source:Projected from Arabidopsis thaliana (AT1G47260) UniProtKB/TrEMBL;Acc:A0A178WI45]	Hexapeptide repeat	AT1G19580, AT1G47260, AT5G66510
TraesCS2D02G153100	M1	Peroxidase [Source:UniProtKB/TrEMBL;Acc:A0A1D5UW99]	Plant peroxidase	AT4G08780, AT4G33420, AT3G21770, AT4G08770, AT5G64110, AT2G38390, AT1G49570, AT1G14550, AT5G66390, AT5G15180, AT5G39580, AT5G06730, AT2G38380, AT2G22420, AT4G36430, AT4G26010, AT1G05260, AT1G44970, AT5G06720, AT2G39040, AT4G16270, AT3G49120, AT5G64100, AT1G71695, AT1G05240, AT3G42570, AT2G43480, AT3G32980, AT1G14540, AT5G51890, AT4G11290, AT1G34510, AT3G03670, AT5G58390, AT5G17820, AT1G68850, AT5…
TraesCS2D02G157100	M1		Proteolipid membrane potential modulator	AT3G05880, AT2G38905, AT4G30650, AT3G05890, AT4G28088, AT1G57550, AT4G30660
TraesCS2D02G157800	M1		Cytochrome P450	AT2G26710, AT4G27710, AT3G14690, AT3G14620, AT3G14640, AT5G24900, AT3G14610, AT3G14660, AT5G52400, AT3G14680, AT2G46960, AT5G38450, AT3G14650, AT1G67110, AT1G17060, AT3G14630, AT5G24910, AT1G75130, AT2G46950
TraesCS2D02G158200	M1		SANT/Myb domain	AT5G57620, AT5G11050, AT5G65230, AT4G26930, AT5G52260, AT4G37780, AT5G61420, AT5G07690, AT5G56110, AT3G48920, AT4G05100, AT3G13890, AT5G40360, AT5G60890, AT1G34670, AT5G55020, AT1G18570, AT2G47460, AT3G61250, AT1G16490, AT3G27920, AT5G14340, AT4G09460, AT5G14750, AT2G32460, AT3G01140, AT1G09540, AT1G57560, AT3G13540, AT1G66390, AT3G28470, AT1G35515, AT3G08500, AT3G47600, AT4G28110, AT3G12820, AT1…
TraesCS2D02G158300	M1		SANT/Myb domain	AT5G57620, AT5G11050, AT5G65230, AT4G26930, AT5G52260, AT4G37780, AT5G61420, AT5G07690, AT5G56110, AT3G48920, AT4G05100, AT3G13890, AT5G40360, AT5G60890, AT1G34670, AT5G55020, AT1G18570, AT2G47460, AT3G61250, AT1G16490, AT3G27920, AT5G14340, AT4G09460, AT5G14750, AT2G32460, AT3G01140, AT1G09540, AT1G57560, AT3G13540, AT1G66390, AT3G28470, AT1G35515, AT3G08500, AT3G47600, AT4G28110, AT3G12820, AT1…
TraesCS2D02G158500	M1		B3 DNA binding domain	AT3G19184, AT5G58280, AT5G42700
TraesCS2D02G158600	M1		HAD hydrolase, subfamily IA	AT2G32150, AT5G59490, AT5G02230, AT3G62040, AT5G59480
TraesCS2D02G162300	M1		EF-hand domain	AT5G39670, AT3G29000
TraesCS2D02G162600	M1		Zinc finger, RING-type	AT3G13430, AT4G05350, AT1G74620, AT2G44330, AT5G53910, AT3G60080, AT1G21960, AT4G12210, AT5G52150, AT3G02340, AT1G14200, AT4G12190, AT3G56580, AT1G18780, AT5G56340, AT3G51325, AT5G64920, AT3G30460, AT3G19950, AT5G08139, AT4G12150, AT3G13228, AT5G60820, AT1G55530, AT1G26800, AT1G68180, AT2G40830, AT1G60360, AT3G10815, AT1G18770, AT3G15740, AT1G18760, AT4G12140, AT4G26400, AT2G29840, AT5G15820, AT5…
TraesCS2D02G162800	M1		Cytochrome P450	AT2G30490
TraesCS2D02G163700	M1		SANT/Myb domain	AT5G57620, AT5G11050, AT5G65230, AT4G26930, AT5G52260, AT4G37780, AT5G61420, AT5G07690, AT5G56110, AT3G48920, AT4G05100, AT3G13890, AT5G40360, AT5G60890, AT1G34670, AT5G55020, AT1G18570, AT2G47460, AT3G61250, AT1G16490, AT3G27920, AT5G14340, AT4G09460, AT5G14750, AT2G32460, AT3G01140, AT1G09540, AT1G57560, AT3G13540, AT1G66390, AT3G28470, AT1G35515, AT3G08500, AT3G47600, AT4G28110, AT3G12820, AT1…
TraesCS2D02G164100	M1		Ribosomal protein S4/S9, N-terminal	AT5G15200, AT5G39850
TraesCS2D02G166100	M1
TraesCS2D02G167300	M1		Protein kinase domain	AT2G27060, AT4G20940, AT5G10020
TraesCS2D02G167800	M1		Ribosomal protein L7/L12	AT2G03130, AT1G70190, AT4G37660, AT3G06040, AT4G36420
TraesCS2D02G168700	M1		Plant lipid transfer protein/Par allergen
TraesCS2D02G168800	M1		Leucine-rich repeat-containing N-terminal, plant-type	AT1G49490, AT3G24480, AT2G15880, AT4G18670, AT4G28380, AT1G62440, AT4G13340, AT3G19020, AT5G25550, AT1G12040, AT3G22800, AT4G33970
TraesCS2D02G170000	M1		Trm112-like	AT1G22270, AT1G78190
TraesCS2D02G171300	M1		Zinc finger, TRAF-type	AT3G11950
TraesCS2D02G171500	M1		GRAM domain	AT1G28200, AT4G40100, AT2G22475, AT4G01600, AT5G13200
TraesCS2D02G171900	M1		Oligosaccaryltransferase	AT5G02502, AT3G09455, AT3G12587
TraesCS2D02G172500	M1		Calcineurin-like phosphoesterase domain, ApaH type	AT3G10150
TraesCS2D02G172700	M1		FAS1 domain	AT3G60900, AT2G45470, AT4G12730
TraesCS2D02G172800	M1		FAS1 domain	AT3G60900, AT2G45470, AT4G12730
TraesCS2D02G172900	M1	Fasciclin-like protein FLA7 [Source:UniProtKB/TrEMBL;Acc:Q06I99]	FAS1 domain	AT3G60900, AT2G45470, AT4G12730
TraesCS2D02G173000	M1	Fasciclin-like protein FLA29 [Source:UniProtKB/TrEMBL;Acc:Q06I77]	Fasciclin-like arabinogalactan protein	AT3G60900, AT2G45470, AT4G12730
TraesCS2D02G174800	M1		Zinc finger, RING-type	AT4G17245, AT2G35910, AT3G61550, AT1G32361, AT4G30370, AT4G10150, AT2G47560, AT2G17450, AT2G46494, AT1G49230, AT4G24015, AT2G42360, AT3G11110, AT2G37580, AT3G19140, AT5G42200, AT5G41440, AT2G44578, AT1G72310, AT1G74410, AT3G28620, AT4G17920, AT1G53820, AT1G20823, AT1G51930, AT2G28920, AT5G46650, AT5G07040, AT5G47610, AT5G01880, AT5G05280, AT4G35480, AT2G42350, AT2G46495, AT1G04360, AT2G34000, AT5…
TraesCS2D02G176400	M1	DNA-directed RNA polymerase subunit [Source:UniProtKB/TrEMBL;Acc:W5C9S2]	Zinc finger, TFIIS-type	AT3G16980, AT4G16265
TraesCS2D02G176800	M1		Tify domain	AT1G17380, AT1G74950, AT1G19180, AT1G72450
TraesCS2D02G177100	M1		SPX domain	AT5G15330, AT5G20150, AT2G45130, AT2G26660
TraesCS2D02G177200	M1		Transmembrane protein GPR107/GPR108-like	AT1G61670, AT1G72480, AT1G10980, AT2G01070
TraesCS2D02G178700	M1		Alpha/beta hydrolase fold-1	AT5G21950, AT4G33180, AT1G17430, AT1G72620
TraesCS2D02G180200	M1		Protein of unknown function DUF1195	AT4G36660, AT5G65650, AT1G19380
TraesCS2D02G180500	M1			AT4G16380, AT1G51090, AT1G49420
TraesCS2D02G182000	M1		NADH-ubiquinone reductase complex 1 MLRQ subunit	AT3G29970, AT3G48140
TraesCS2D02G183700	M1		Ethylene-responsive binding factor-associated repression	AT3G02140, AT1G69260, AT1G13740, AT3G29575, AT3G07255
TraesCS2D02G184400	M1		FAS1 domain	AT3G60900, AT2G45470, AT4G12730
TraesCS2D02G185800	M1		X8 domain	AT5G63230, AT4G13600, AT5G08000, AT3G58100, AT1G79480, AT2G43660, AT5G53600, AT1G29380, AT5G67460, AT4G09467, AT3G28250, AT2G04910, AT5G53610, AT2G42930, AT1G18650, AT1G78520, AT1G13830, AT1G26450, AT2G30933, AT2G43670, AT4G09466, AT2G29735, AT4G09090, AT5G63225, AT1G66852, AT1G69295, AT4G09465, AT5G63250, AT4G09462, AT5G61130, AT1G09460, AT4G05430, AT1G66870, AT5G35740, AT5G63240, AT1G66855, AT2…
TraesCS2D02G188700	M1		Thaumatin family	AT4G36010, AT4G38670, AT2G28790, AT5G02140, AT1G73620, AT1G20030, AT1G18250, AT4G24180, AT2G17860, AT4G38660, AT2G24810, AT1G75030, AT5G40020, AT1G75040, AT1G19320, AT4G36000, AT1G75050, AT4G11650, AT4G18253, AT1G77700, AT1G75800, AT5G24620
TraesCS2D02G189100	M1		Zinc finger C2H2-type	AT4G04404, AT1G26610, AT1G26590, AT3G60580
TraesCS2D02G190200	M1		Protein kinase domain	AT1G74360
TraesCS2D02G191100	M1			AT1G26650, AT1G69430
TraesCS2D02G191800	M1		GH3 family	AT4G37390, AT5G13370, AT2G47750, AT4G27260, AT5G13320, AT1G28130, AT1G48660, AT2G23170, AT1G23160, AT1G48670, AT2G14960, AT1G48690, AT5G54510, AT5G13360, AT5G51470, AT5G13350, AT1G59500, AT5G13380
TraesCS2D02G192100	M1		Short-chain dehydrogenase/reductase SDR	AT3G42960, AT2G47120, AT3G26760, AT1G52340, AT3G29260, AT4G03140, AT3G51680, AT2G47140, AT3G26770, AT3G29250, AT2G47130, AT2G47150
TraesCS2D02G192300	M1		Gibberellin regulated protein
TraesCS2D02G196100	M1		NADH dehydrogenase ubiquinone Fe-S protein 4, mitochondrial	AT5G67590
TraesCS2D02G196800	M1		Cysteine-rich transmembrane CYSTM domain
TraesCS2D02G197100	M1		C2 domain	AT1G50570, AT5G55530, AT5G12300
TraesCS2D02G197600	M1	Probable serine/threonine-protein kinase WNK11 [Source:Projected from Arabidopsis thaliana (AT5G55560) UniProtKB/Swiss-Prot;Acc:Q6ICW6]	Protein kinase domain	AT3G51630, AT1G64630, AT5G55560, AT3G04910, AT5G28080, AT5G41990, AT3G18750, AT3G22420, AT3G48260, AT5G58350, AT1G49160
TraesCS2D02G197900	M1			AT2G01580, AT3G46890, AT5G05950, AT3G07510
TraesCS2D02G198800	M1		Sugar/inositol transporter	AT2G18480, AT2G20780, AT2G16130, AT3G18830, AT2G16120, AT4G36670
TraesCS2D02G199600	M1		Sugar phosphate transporter domain	AT1G21070, AT5G42420, AT4G09810, AT4G39390, AT1G76670, AT1G34020
TraesCS2D02G199900	M1	Transcription factor, Brassinosteroid (BR)-regulated growth response, Feedback inhibition of BR biosynthesi [Source: Projected from Oryza sativa (Os07g0580500)]	BES1/BZR1 plant transcription factor, N-terminal	AT1G75080, AT1G19350, AT4G36780, AT3G50750
TraesCS2D02G200600	M1	Succinate--CoA ligase [ADP-forming] subunit alpha, mitochondrial [Source:UniProtKB/TrEMBL;Acc:W5C4B7]	CoA-binding	AT5G08300, AT5G23250
TraesCS2D02G200700	M1	Chlorophyll a-b binding protein, chloroplastic [Source:UniProtKB/TrEMBL;Acc:A0A1D5V215]	Chlorophyll A-B binding protein, plant	AT1G19150, AT3G61470, AT5G28450, AT3G47470
TraesCS2D02G202200	M1	Tubulin alpha chain [Source:UniProtKB/TrEMBL;Acc:A4K4Z3]	Tubulin	AT5G19780, AT4G14960, AT5G19770, AT1G64740, AT1G50010, AT1G04820
TraesCS2D02G203800	M1		Ribosomal protein S15	AT3G60770, AT4G00100
TraesCS2D02G204600	M1		Protein BRICK1	AT2G22640
TraesCS2D02G206900	M1		Remorin, C-terminal	AT2G41870, AT3G57540
TraesCS2D02G207200	M1	Polygalacturonase-inhibiting protein, Inhibitor of fungal polygalacturonase, Regulation of floral organ numbe [Source: Projected from Oryza sativa (Os07g0568700)]	Leucine-rich repeat	AT1G33612, AT5G06860, AT1G33610, AT3G12145, AT5G06870, AT1G33590
TraesCS2D02G208800	M1		Putative cell wall protein
TraesCS2D02G209200	M1		At4g28100-like	AT4G28100, AT3G18050
TraesCS2D02G209900	M1	Chlorophyll a-b binding protein, chloroplastic [Source:UniProtKB/TrEMBL;Acc:A0A1D5V1G5]	Chlorophyll A-B binding protein, plant	AT5G01530, AT3G08940, AT2G40100, AT1G61520
TraesCS2D02G210400	M1		Protein of unknown function DUF1223	AT5G54240, AT4G27350
TraesCS2D02G210500	M1		Armadillo	AT1G61350
TraesCS2D02G210900	M1
TraesCS2D02G211100	M1		Major facilitator, sugar transporter-like	AT1G79360, AT1G79410, AT1G16390, AT1G16370
TraesCS2D02G212300	M1			AT2G20835, AT3G15534, AT1G52855
TraesCS2D02G214200	M1		PPM-type phosphatase domain	AT5G27930, AT5G36250, AT4G32950, AT3G16800, AT3G02750, AT1G03590, AT4G03415, AT5G01700, AT5G26010, AT1G79630, AT1G16220, AT3G05640
TraesCS2D02G214600	M1		PB1 domain	AT4G05150
TraesCS2D02G214700	M1	Cytochrome b6-f complex iron-sulfur subunit, chloroplastic [Source:UniProtKB/Swiss-Prot;Acc:Q7X9A6]	Rieske iron-sulphur protein, C-terminal	AT4G03280
TraesCS2D02G215000	M1	Putative cyclin-D6-1 [Source:Projected from Arabidopsis thaliana (AT4G03270) UniProtKB/Swiss-Prot;Acc:Q9ZR04]	Cyclin, C-terminal domain	AT4G37630, AT5G10440, AT4G03270, AT5G02110, AT5G67260, AT2G22490, AT5G65420, AT4G34160, AT1G70210, AT3G50070
TraesCS2D02G217500	M1	Serine/threonine-protein kinase [Source:UniProtKB/TrEMBL;Acc:A0A1D5UY85]	Protein kinase domain	AT4G23240, AT4G23230, AT4G11490, AT1G61380, AT4G04490, AT1G61460, AT1G67520, AT1G11280, AT4G23260, AT4G27290, AT4G21400, AT4G23140, AT4G23190, AT4G21410, AT4G23130, AT4G27300, AT4G00970, AT4G11530, AT4G28670, AT1G11330, AT4G11460, AT1G11410, AT4G21366, AT4G05200, AT4G11470, AT1G61490, AT1G61500, AT4G23250, AT1G61420, AT1G11300, AT1G61550, AT2G01780, AT1G70520, AT5G39370, AT3G12000, AT3G45860, AT4…
TraesCS2D02G219400	M1		Syntaxin, N-terminal domain	AT5G08080, AT3G03800
TraesCS2D02G219600	M1		NPH3 domain	AT3G19850, AT3G22104, AT1G50280
TraesCS2D02G220500	M1	Histone H2A [Source:UniProtKB/TrEMBL;Acc:W5BNS0]	Histone H2A	AT1G54690, AT4G27230, AT3G20670, AT1G51060, AT5G27670, AT5G59870, AT5G54640, AT1G08880, AT5G02560
TraesCS2D02G220800	M1		Oxygen-evolving enhancer protein 3	AT4G21280, AT4G05180
TraesCS2D02G220900	M1		Glycoside hydrolase, family 14B, plant	AT2G32290, AT4G15210
TraesCS2D02G221000	M1	Beta-amylase [Source:UniProtKB/TrEMBL;Acc:A0A341R889]	Glycoside hydrolase, family 14B, plant	AT2G32290, AT4G15210
TraesCS2D02G221500	M1		Protein kinase domain	AT4G23240, AT4G23230, AT4G11490, AT1G61380, AT4G04490, AT1G61460, AT1G67520, AT1G11280, AT4G23260, AT4G27290, AT4G21400, AT4G23140, AT4G23190, AT4G21410, AT4G23130, AT4G27300, AT4G00970, AT4G11530, AT4G28670, AT1G11330, AT4G11460, AT1G11410, AT4G21366, AT4G05200, AT4G11470, AT1G61490, AT1G61500, AT4G23250, AT1G61420, AT1G11300, AT1G61550, AT2G01780, AT1G70520, AT5G39370, AT3G12000, AT3G45860, AT4…
TraesCS2D02G224700	M1		Glutathione S-transferase, N-terminal	AT1G78360, AT1G59700, AT1G78380, AT1G78370, AT1G78320, AT1G10360, AT1G59670, AT1G17190, AT2G29440, AT1G17170, AT1G27130, AT3G43800, AT1G10370, AT2G29460, AT3G09270, AT2G29490, AT2G29420, AT2G29470, AT1G69920, AT5G62480, AT1G17180, AT2G29450, AT1G27140, AT1G53680, AT2G29480, AT1G69930, AT1G78340, AT1G74590
TraesCS2D02G226000	M1		Triose phosphate/phosphoenolpyruvate translocator	AT5G54800, AT5G17630, AT4G03950, AT1G61800
TraesCS2D02G226500	M1		Fumarate reductase/succinate dehydrogenase, transmembrane subunit
TraesCS2D02G226800	M1			AT5G54850
TraesCS2D02G228200	M1	Protein DETOXIFICATION [Source:UniProtKB/TrEMBL;Acc:A0A1D5V318]	Multi antimicrobial extrusion protein	AT1G47530, AT4G21910, AT5G38030, AT3G03620, AT5G10420, AT5G65380, AT4G25640, AT1G33080, AT1G11670, AT1G61890, AT5G17700, AT3G26590, AT4G00350, AT3G21690, AT1G33090, AT1G33110, AT1G12950, AT1G33100, AT1G23300, AT5G44050, AT4G21903
TraesCS2D02G229600	M1		ATP synthase, F1 complex, gamma subunit	AT4G04640, AT1G15700
TraesCS2D02G229800	M1			AT2G18910
TraesCS2D02G230800	M1		Multicopper oxidase, type 1	AT4G28090, AT5G66920, AT1G76160, AT1G21850, AT4G37160, AT4G38420, AT1G41830, AT2G23630, AT1G75790, AT4G22010, AT1G21860
TraesCS2D02G230900	M1		Glycoside hydrolase family 17	AT1G66250, AT5G56590, AT3G13560, AT1G11820, AT2G01630, AT4G29360
TraesCS2D02G233300	M1		C2 domain	AT5G37740, AT2G01540, AT1G48590, AT3G17980, AT1G70790, AT1G66360, AT1G23140, AT1G73580, AT1G70800, AT1G70810
TraesCS2D02G238700	M1		Cyanobacterial aminoacyl-tRNA synthetase, CAAD domain	AT1G52220, AT2G46820
TraesCS2D02G248300	M1	Small nuclear ribonucleoprotein-associated protein [Source:UniProtKB/TrEMBL;Acc:A0A1D5UP28]	LSM domain, eukaryotic/archaea-type	AT4G20440, AT5G44500
TraesCS2D02G248400	M1	Oxygen evolving enhancer protein [Source:UniProtKB/TrEMBL;Acc:W5B9L0]	Photosystem II PsbO, manganese-stabilising	AT3G50820, AT5G66570
TraesCS2D02G249500	M1		Alpha/beta hydrolase fold-3	AT5G16080, AT1G47480, AT1G49660, AT1G49650, AT1G49640, AT3G48700, AT2G45600, AT2G45610, AT1G68620, AT1G19190, AT5G23530, AT5G06570, AT5G62180, AT3G48690, AT2G03550
TraesCS2D02G250500	M1		FAS1 domain	AT5G05650, AT5G06390, AT3G52370, AT3G11700, AT2G35860
TraesCS2D02G251300	M1		FAD dependent oxidoreductase	AT5G67290
TraesCS2D02G251700	M1		Tify domain	AT3G22275, AT1G30135, AT2G34600
TraesCS2D02G251800	M1	Similar to Glycolate oxidase (EC 1.1.3.15) (Fragment) [Source: Projected from Oryza sativa (Os07g0152900)]	FMN-dependent dehydrogenase	AT3G14420, AT3G14150, AT3G14130, AT3G14415, AT4G18360
TraesCS2D02G253200	M1		Photosystem I PsaG/PsaK protein	AT1G30380
TraesCS2D02G254700	M1		Aldo/keto reductase, conserved site	AT1G06690
TraesCS2D02G255100	M1		PsbP, C-terminal	AT1G06680, AT2G30790
TraesCS2D02G255900	M1		Protein kinase domain	AT5G65710, AT1G75820, AT4G28490, AT3G49670, AT4G20270, AT5G48940, AT3G19700, AT3G24240, AT5G65700, AT1G28440, AT5G49660, AT1G08590, AT1G09970, AT4G28650, AT5G61480
TraesCS2D02G258100	M1		F-box domain
TraesCS2D02G259200	M1		SANT/Myb domain	AT4G37180, AT1G25550, AT1G49560, AT1G13300, AT3G25790, AT2G03500, AT1G68670
TraesCS2D02G259400	M1		Proton-dependent oligopeptide transporter family	AT1G27040, AT1G69850
TraesCS2D02G260000	M1		Ribonuclease T2-like	AT2G39780, AT1G14210, AT1G26820, AT2G02990, AT1G14220
TraesCS2D02G261600	M1		Phytocyanin domain	AT3G01070, AT2G27035
TraesCS2D02G261800	M1	Protein kish [Source:UniProtKB/TrEMBL;Acc:W5BFZ6]	Protein kish	AT5G20165
TraesCS2D02G264500	M1		NADPH-dependent FMN reductase-like	AT4G27270, AT5G58800, AT4G36750, AT5G54500
TraesCS2D02G265700	M1	Glutamate receptor [Source:UniProtKB/TrEMBL;Acc:A0A1D5UU28]	Ionotropic glutamate receptor	AT4G35290, AT2G24710, AT5G48410, AT2G32390, AT3G07520, AT1G05200, AT3G51480, AT5G11180, AT2G32400, AT4G31710, AT5G27100, AT2G29120, AT3G04110, AT1G42540, AT5G48400, AT5G11210, AT2G17260, AT2G29100, AT2G24720, AT2G29110
TraesCS2D02G266500	M1		Senescence regulator S40	AT3G15040, AT2G34340, AT4G18980, AT4G21930, AT4G04630, AT5G03230, AT1G61930, AT3G45210, AT1G11700, AT4G26950, AT1G29640, AT4G21970, AT2G28400, AT5G60680, AT5G45630
TraesCS2D02G267500	M1		Legume lectin domain	AT3G09035, AT3G54080, AT3G09190, AT5G01090
TraesCS2D02G267800	M1		Pyridoxal 5'-phosphate synthase subunit PdxS/SNZ	AT3G16050, AT2G38230, AT5G01410, AT2G38210
TraesCS2D02G267900	M1		Sialate O-acetylesterase domain	AT4G34215, AT3G53010
TraesCS2D02G269200	M1	WRKY transcription factor, Positive regulator in defense response, Negative regulator in GA signalin [Source: Projected from Oryza sativa (Os04g0287400)]	WRKY domain	AT4G31550, AT2G23320, AT2G30590, AT2G24570, AT3G04670, AT5G28650, AT4G24240
TraesCS2D02G270100	M1	LOB domain-containing protein 41 [Source:Projected from Arabidopsis thaliana (AT3G02550) UniProtKB/Swiss-Prot;Acc:Q9M886]	Lateral organ boundaries, LOB	AT1G68510, AT4G37540, AT3G49940, AT1G67100, AT5G67420, AT3G02550
TraesCS2D02G271700	M1		Ribose 5-phosphate isomerase, type A	AT1G71100, AT2G01290, AT3G04790
TraesCS2D02G271800	M1	SECE1 [Source:Projected from Arabidopsis thaliana (AT4G14870) UniProtKB/TrEMBL;Acc:A0A178UZ24]		AT4G14870
TraesCS2D02G272400	M1		Peptidase C1A, papain C-terminal	AT3G54940, AT4G16190, AT4G39090, AT2G21430
TraesCS2D02G272800	M1	Glycosyltransferase [Source:UniProtKB/TrEMBL;Acc:A0A1D5URA9]	UDP-glucuronosyl/UDP-glucosyltransferase	AT5G05880, AT5G05900, AT1G22370, AT1G22340, AT3G11340, AT2G26480, AT3G46680, AT5G05870, AT5G59590, AT1G78270, AT3G55710, AT2G28080, AT5G59580, AT3G46690, AT2G36970, AT5G05860, AT1G22380, AT3G46670, AT3G46700, AT5G37950, AT1G22400, AT5G38040, AT3G46660, AT1G22360, AT3G46650, AT3G55700, AT5G38010, AT3G46720, AT5G05890
TraesCS2D02G273900	M1		NTP pyrophosphohydrolase MazG, putative catalytic core	AT3G25400
TraesCS2D02G281100	M1		Zinc finger, MYND-type	AT5G50450, AT1G67340
TraesCS2D02G281300	M1			AT5G43260
TraesCS2D02G281400	M1		Zinc finger protein SHOOT GRAVITROPISM 5-like
TraesCS2D02G282500	M1		Protein of unknown function DUF3339	AT5G40960, AT3G27030, AT3G48660, AT3G27027, AT5G40980, AT5G08391, AT3G01950, AT5G63500, AT5G50660, AT5G14110, AT5G50560, AT3G01940
TraesCS2D02G287000	M1			AT4G16380, AT1G51090, AT1G49420
TraesCS2D02G287300	M1	Potassium transporter [Source:UniProtKB/TrEMBL;Acc:A0A1D5UIS5]	Potassium transporter	AT4G23640, AT1G60160, AT2G40540, AT1G31120, AT3G02050, AT2G30070, AT4G13420, AT4G33530, AT5G09400, AT5G14880, AT1G70300, AT4G19960, AT2G35060
[truncated: 26,469 more rows]

## Sheet: GOs
Module	q_value	term_size	query_size	intersection_size	precision	recall	term_id	source	term_name	effective_domain_size
M1	4.78154e-74	202	6589	133	0.0201852	0.658416	GO:0006334	GO:BP	nucleosome assembly	60275
M1	6.19405e-74	203	6589	133	0.0201852	0.655172	GO:0034728	GO:BP	nucleosome organization	60275
M1	7.23051e-70	418	6589	191	0.0289877	0.456938	GO:0015979	GO:BP	photosynthesis	60275
M1	2.45466e-56	261	6589	134	0.0203369	0.51341	GO:0065004	GO:BP	protein-DNA complex assembly	60275
M1	6.5399e-56	263	6589	134	0.0203369	0.509506	GO:0071824	GO:BP	protein-DNA complex subunit organization	60275
M1	6.55088e-46	82	6589	66	0.0100167	0.804878	GO:0009765	GO:BP	photosynthesis, light harvesting	60275
M1	6.99966e-43	202	6589	103	0.0156321	0.509901	GO:0019684	GO:BP	photosynthesis, light reaction	60275
M1	3.91348e-38	291	6589	120	0.0182122	0.412371	GO:1902074	GO:BP	response to salt	60275
M1	2.61798e-37	242	6589	107	0.0162392	0.442149	GO:0009414	GO:BP	response to water deprivation	60275
M1	3.26059e-34	271	6589	110	0.0166945	0.405904	GO:0009415	GO:BP	response to water	60275
M1	1.47735e-33	275	6589	110	0.0166945	0.4	GO:0001101	GO:BP	response to acid chemical	60275
M1	5.40963e-33	393	6589	135	0.0204887	0.343511	GO:0006338	GO:BP	chromatin remodeling	60275
M1	2.23433e-32	477	6589	151	0.022917	0.316562	GO:0010035	GO:BP	response to inorganic substance	60275
M1	1.46044e-29	446	6589	140	0.0212475	0.313901	GO:0006325	GO:BP	chromatin organization	60275
M1	8.36287e-29	484	6589	146	0.0221581	0.301653	GO:0071554	GO:BP	cell wall organization or biogenesis	60275
M1	1.62765e-28	1808	6589	362	0.0549401	0.200221	GO:0005975	GO:BP	carbohydrate metabolic process	60275
M1	3.31324e-27	127	6589	65	0.00986493	0.511811	GO:0010410	GO:BP	hemicellulose metabolic process	60275
M1	3.82858e-26	135	6589	66	0.0100167	0.488889	GO:0010383	GO:BP	cell wall polysaccharide metabolic process	60275
M1	9.38918e-26	176	6589	76	0.0115344	0.431818	GO:0044036	GO:BP	cell wall macromolecule metabolic process	60275
M1	2.24857e-23	598	6589	156	0.0236758	0.26087	GO:0006091	GO:BP	generation of precursor metabolites and energy	60275
M1	9.09136e-23	25	6589	25	0.0037942	1	GO:0009768	GO:BP	photosynthesis, light harvesting in photosystem I	60275
M1	1.26354e-22	1065	6589	231	0.0350584	0.216901	GO:0009628	GO:BP	response to abiotic stimulus	60275
M1	6.41893e-22	1636	6589	315	0.047807	0.192543	GO:0042221	GO:BP	response to chemical	60275
M1	2.36153e-21	817	6589	188	0.0285324	0.23011	GO:1901700	GO:BP	response to oxygen-containing compound	60275
M1	4.97424e-19	328	6589	98	0.0148733	0.29878	GO:0071555	GO:BP	cell wall organization	60275
M1	4.97424e-19	1260	6589	250	0.037942	0.198413	GO:0010033	GO:BP	response to organic substance	60275
M1	8.01056e-19	346	6589	101	0.0153286	0.291908	GO:0045229	GO:BP	external encapsulating structure organization	60275
M1	8.34875e-19	58	6589	36	0.00546365	0.62069	GO:0010411	GO:BP	xyloglucan metabolic process	60275
M1	2.80721e-17	823	6589	178	0.0270147	0.216282	GO:0065003	GO:BP	protein-containing complex assembly	60275
M1	7.64869e-15	915	6589	185	0.0280771	0.202186	GO:0043933	GO:BP	protein-containing complex organization	60275
M1	1.08149e-13	477	6589	113	0.0171498	0.236897	GO:0005976	GO:BP	polysaccharide metabolic process	60275
M1	1.98181e-13	146	6589	52	0.00789194	0.356164	GO:0042546	GO:BP	cell wall biogenesis	60275
M1	2.33783e-12	252	6589	71	0.0107755	0.281746	GO:0072330	GO:BP	monocarboxylic acid biosynthetic process	60275
M1	1.36477e-11	29	6589	20	0.00303536	0.689655	GO:0009773	GO:BP	photosynthetic electron transport in photosystem I	60275
M1	1.4947e-11	186	6589	57	0.00865078	0.306452	GO:0006633	GO:BP	fatty acid biosynthetic process	60275
M1	3.55209e-11	621	6589	129	0.0195781	0.207729	GO:0032787	GO:BP	monocarboxylic acid metabolic process	60275
M1	5.78662e-11	197	6589	58	0.00880255	0.294416	GO:0042743	GO:BP	hydrogen peroxide metabolic process	60275
M1	8.27132e-11	1080	6589	195	0.0295948	0.180556	GO:0022607	GO:BP	cellular component assembly	60275
M1	8.53498e-11	370	6589	88	0.0133556	0.237838	GO:0006979	GO:BP	response to oxidative stress	60275
M1	4.94076e-10	19	6589	15	0.00227652	0.789474	GO:0019253	GO:BP	reductive pentose-phosphate cycle	60275
M1	4.94076e-10	19	6589	15	0.00227652	0.789474	GO:0019685	GO:BP	photosynthesis, dark reaction	60275
M1	6.84609e-10	242	6589	64	0.00971316	0.264463	GO:0072593	GO:BP	reactive oxygen species metabolic process	60275
M1	1.65354e-09	20	6589	15	0.00227652	0.75	GO:0030388	GO:BP	fructose 1,6-bisphosphate metabolic process	60275
M1	1.65354e-09	191	6589	54	0.00819548	0.282723	GO:0006869	GO:BP	lipid transport	60275
M1	2.94814e-09	183	6589	52	0.00789194	0.284153	GO:0042744	GO:BP	hydrogen peroxide catabolic process	60275
M1	3.79324e-09	71	6589	29	0.00440127	0.408451	GO:0045491	GO:BP	xylan metabolic process	60275
M1	5.80462e-09	27	6589	17	0.00258006	0.62963	GO:0009853	GO:BP	photorespiration	60275
M1	1.46869e-08	202	6589	54	0.00819548	0.267327	GO:0010876	GO:BP	lipid localization	60275
M1	1.52876e-08	687	6589	130	0.0197299	0.189229	GO:0016053	GO:BP	organic acid biosynthetic process	60275
M1	1.52876e-08	687	6589	130	0.0197299	0.189229	GO:0046394	GO:BP	carboxylic acid biosynthetic process	60275
M1	1.98099e-08	1570	6589	251	0.0380938	0.159873	GO:0044085	GO:BP	cellular component biogenesis	60275
M1	3.86609e-08	290	6589	68	0.0103202	0.234483	GO:0006631	GO:BP	fatty acid metabolic process	60275
M1	1.51415e-06	899	6589	152	0.0230688	0.169077	GO:0044283	GO:BP	small molecule biosynthetic process	60275
M1	4.04126e-06	350	6589	72	0.0109273	0.205714	GO:0016052	GO:BP	carbohydrate catabolic process	60275
M1	8.27147e-06	61	6589	22	0.0033389	0.360656	GO:0016998	GO:BP	cell wall macromolecule catabolic process	60275
M1	1.2703e-05	72	6589	24	0.00364243	0.333333	GO:0009767	GO:BP	photosynthetic electron transport chain	60275
M1	1.27371e-05	153	6589	39	0.00591896	0.254902	GO:0000272	GO:BP	polysaccharide catabolic process	60275
M1	1.96338e-05	292	6589	61	0.00925785	0.208904	GO:0044042	GO:BP	glucan metabolic process	60275
M1	2.19013e-05	186	6589	44	0.0066778	0.236559	GO:0009409	GO:BP	response to cold	60275
M1	3.03424e-05	38	6589	16	0.00242829	0.421053	GO:0015977	GO:BP	carbon fixation	60275
M1	3.60809e-05	71	6589	23	0.00349067	0.323944	GO:0006006	GO:BP	glucose metabolic process	60275
M1	6.22208e-05	263	6589	55	0.00834725	0.209125	GO:0022900	GO:BP	electron transport chain	60275
M1	6.41079e-05	1610	6589	236	0.0358173	0.146584	GO:0006082	GO:BP	organic acid metabolic process	60275
M1	6.88146e-05	1604	6589	235	0.0356655	0.146509	GO:0043436	GO:BP	oxoacid metabolic process	60275
M1	7.02943e-05	1589	6589	233	0.035362	0.146633	GO:0019752	GO:BP	carboxylic acid metabolic process	60275
M1	0.0001234	25	6589	12	0.00182122	0.48	GO:0042938	GO:BP	dipeptide transport	60275
M1	0.000172822	9	6589	7	0.00106238	0.777778	GO:2000068	GO:BP	regulation of defense response to insect	60275
M1	0.000172822	9	6589	7	0.00106238	0.777778	GO:0009625	GO:BP	response to insect	60275
M1	0.000204999	12	6589	8	0.00121414	0.666667	GO:0009695	GO:BP	jasmonic acid biosynthetic process	60275
M1	0.000204999	12	6589	8	0.00121414	0.666667	GO:0032544	GO:BP	plastid translation	60275
M1	0.000232111	118	6589	30	0.00455304	0.254237	GO:0071669	GO:BP	plant-type cell wall organization or biogenesis	60275
M1	0.00033178	347	6589	65	0.00986493	0.18732	GO:0098542	GO:BP	defense response to other organism	60275
M1	0.000372215	2805	6589	377	0.0572166	0.134403	GO:0016043	GO:BP	cellular component organization	60275
M1	0.000373663	2034	6589	283	0.0429504	0.139135	GO:0055085	GO:BP	transmembrane transport	60275
M1	0.000476983	51	6589	17	0.00258006	0.333333	GO:0015995	GO:BP	chlorophyll biosynthetic process	60275
M1	0.000476983	77	6589	22	0.0033389	0.285714	GO:0006857	GO:BP	oligopeptide transport	60275
M1	0.000476983	77	6589	22	0.0033389	0.285714	GO:0015833	GO:BP	peptide transport	60275
M1	0.000667474	29	6589	12	0.00182122	0.413793	GO:0044347	GO:BP	cell wall polysaccharide catabolic process	60275
M1	0.000667474	29	6589	12	0.00182122	0.413793	GO:0045493	GO:BP	xylan catabolic process	60275
M1	0.000667474	29	6589	12	0.00182122	0.413793	GO:2000895	GO:BP	hemicellulose catabolic process	60275
M1	0.000777343	48	6589	16	0.00242829	0.333333	GO:0009739	GO:BP	response to gibberellin	60275
M1	0.000777343	393	6589	70	0.0106238	0.178117	GO:0016051	GO:BP	carbohydrate biosynthetic process	60275
M1	0.000813025	34	6589	13	0.00197299	0.382353	GO:0045492	GO:BP	xylan biosynthetic process	60275
M1	0.00103643	81	6589	22	0.0033389	0.271605	GO:0062197	GO:BP	cellular response to chemical stress	60275
M1	0.00103764	11	6589	7	0.00106238	0.636364	GO:0042549	GO:BP	photosystem II stabilization	60275
M1	0.00109	87	6589	23	0.00349067	0.264368	GO:0042886	GO:BP	amide transport	60275
M1	0.00116036	471	6589	80	0.0121414	0.169851	GO:0043207	GO:BP	response to external biotic stimulus	60275
M1	0.00116036	471	6589	80	0.0121414	0.169851	GO:0051707	GO:BP	response to other organism	60275
M1	0.00118155	105	6589	26	0.00394597	0.247619	GO:0006779	GO:BP	porphyrin-containing compound biosynthetic process	60275
M1	0.00131552	136	6589	31	0.00470481	0.227941	GO:0010038	GO:BP	response to metal ion	60275
M1	0.00137962	2706	6589	359	0.0544847	0.132668	GO:0044281	GO:BP	small molecule metabolic process	60275
M1	0.00149603	15	6589	8	0.00121414	0.533333	GO:0042759	GO:BP	long-chain fatty acid biosynthetic process	60275
M1	0.0016022	46	6589	15	0.00227652	0.326087	GO:0070592	GO:BP	cell wall polysaccharide biosynthetic process	60275
M1	0.0016383	23	6589	10	0.00151768	0.434783	GO:0031407	GO:BP	oxylipin metabolic process	60275
M1	0.00165156	19	6589	9	0.00136591	0.473684	GO:0016106	GO:BP	sesquiterpenoid biosynthetic process	60275
M1	0.00165156	138	6589	31	0.00470481	0.224638	GO:0046148	GO:BP	pigment biosynthetic process	60275
M1	0.00183131	486	6589	81	0.0122932	0.166667	GO:0044419	GO:BP	biological process involved in interspecies interaction between organisms	60275
M1	0.00201458	883	6589	133	0.0201852	0.150623	GO:0009725	GO:BP	response to hormone	60275
M1	0.00233959	86	6589	22	0.0033389	0.255814	GO:0009312	GO:BP	oligosaccharide biosynthetic process	60275
M1	0.00238139	24	6589	10	0.00151768	0.416667	GO:0009694	GO:BP	jasmonic acid metabolic process	60275
M1	0.00239063	887	6589	133	0.0201852	0.149944	GO:0009719	GO:BP	response to endogenous stimulus	60275
M1	0.00292491	29	6589	11	0.00166945	0.37931	GO:0010109	GO:BP	regulation of photosynthesis	60275
M1	0.00304526	124	6589	28	0.00424951	0.225806	GO:1901606	GO:BP	alpha-amino acid catabolic process	60275
M1	0.00328312	503	6589	82	0.012445	0.163022	GO:0009607	GO:BP	response to biotic stimulus	60275
M1	0.00335443	71	6589	19	0.00288359	0.267606	GO:0015994	GO:BP	chlorophyll metabolic process	60275
M1	0.00338781	125	6589	28	0.00424951	0.224	GO:0009063	GO:BP	amino acid catabolic process	60275
M1	0.00338781	244	6589	46	0.00698133	0.188525	GO:0006970	GO:BP	response to osmotic stress	60275
M1	0.00347946	13	6589	7	0.00106238	0.538462	GO:0002213	GO:BP	defense response to insect	60275
M1	0.0037394	21	6589	9	0.00136591	0.428571	GO:0009065	GO:BP	glutamine family amino acid catabolic process	60275
M1	0.0041252	45	6589	14	0.00212475	0.311111	GO:1905393	GO:BP	plant organ formation	60275
M1	0.00413059	35	6589	12	0.00182122	0.342857	GO:0006086	GO:BP	acetyl-CoA biosynthetic process from pyruvate	60275
M1	0.00455707	220	6589	42	0.00637426	0.190909	GO:0009651	GO:BP	response to salt stress	60275
M1	0.00458774	10	6589	6	0.000910609	0.6	GO:0009938	GO:BP	negative regulation of gibberellic acid mediated signaling pathway	60275
M1	0.00473624	62	6589	17	0.00258006	0.274194	GO:0009664	GO:BP	plant-type cell wall organization	60275
M1	0.00473624	62	6589	17	0.00258006	0.274194	GO:0009611	GO:BP	response to wounding	60275
M1	0.00473624	91	6589	22	0.0033389	0.241758	GO:0046942	GO:BP	carboxylic acid transport	60275
M1	0.00473624	91	6589	22	0.0033389	0.241758	GO:0015849	GO:BP	organic acid transport	60275
M1	0.00473624	214	6589	41	0.00622249	0.191589	GO:0006090	GO:BP	pyruvate metabolic process	60275
M1	0.00475696	7	6589	5	0.00075884	0.714286	GO:1901600	GO:BP	strigolactone metabolic process	60275
M1	0.00475696	7	6589	5	0.00075884	0.714286	GO:1901601	GO:BP	strigolactone biosynthetic process	60275
M1	0.00475696	122	6589	27	0.00409774	0.221311	GO:0033014	GO:BP	tetrapyrrole biosynthetic process	60275
M1	0.00475696	141	6589	30	0.00455304	0.212766	GO:0009723	GO:BP	response to ethylene	60275
M1	0.00482491	31	6589	11	0.00166945	0.354839	GO:0015749	GO:BP	monosaccharide transmembrane transport	60275
M1	0.0049837	22	6589	9	0.00136591	0.409091	GO:0031408	GO:BP	oxylipin biosynthetic process	60275
M1	0.0049837	22	6589	9	0.00136591	0.409091	GO:0006714	GO:BP	sesquiterpenoid metabolic process	60275
M1	0.00516135	80	6589	20	0.00303536	0.25	GO:0046351	GO:BP	disaccharide biosynthetic process	60275
M1	0.00516496	372	6589	63	0.00956139	0.169355	GO:0009416	GO:BP	response to light stimulus	60275
M1	0.0054023	18	6589	8	0.00121414	0.444444	GO:0001666	GO:BP	response to hypoxia	60275
M1	0.00583472	47	6589	14	0.00212475	0.297872	GO:0120255	GO:BP	olefinic compound biosynthetic process	60275
M1	0.00606875	42	6589	13	0.00197299	0.309524	GO:0009699	GO:BP	phenylpropanoid biosynthetic process	60275
M1	0.00606875	42	6589	13	0.00197299	0.309524	GO:1904029	GO:BP	regulation of cyclin-dependent protein kinase activity	60275
M1	0.00606875	42	6589	13	0.00197299	0.309524	GO:0000079	GO:BP	regulation of cyclin-dependent protein serine/threonine kinase activity	60275
M1	0.00714268	59	6589	16	0.00242829	0.271186	GO:1902221	GO:BP	erythrose 4-phosphate/phosphoenolpyruvate family amino acid metabolic process	60275
M1	0.00714268	59	6589	16	0.00242829	0.271186	GO:0006558	GO:BP	L-phenylalanine metabolic process	60275
M1	0.00766424	11	6589	6	0.000910609	0.545455	GO:0046656	GO:BP	folic acid biosynthetic process	60275
M1	0.00767796	28	6589	10	0.00151768	0.357143	GO:0005986	GO:BP	sucrose biosynthetic process	60275
M1	0.00767796	28	6589	10	0.00151768	0.357143	GO:0001676	GO:BP	long-chain fatty acid metabolic process	60275
M1	0.00767796	71	6589	18	0.00273183	0.253521	GO:0034599	GO:BP	cellular response to oxidative stress	60275
M1	0.00767796	133	6589	28	0.00424951	0.210526	GO:0006778	GO:BP	porphyrin-containing compound metabolic process	60275
M1	0.008195	15	6589	7	0.00106238	0.466667	GO:0006542	GO:BP	glutamine biosynthetic process	60275
M1	0.008195	15	6589	7	0.00106238	0.466667	GO:0015908	GO:BP	fatty acid transport	60275
M1	0.0084017	147	6589	30	0.00455304	0.204082	GO:0015711	GO:BP	organic anion transport	60275
M1	0.00843124	49	6589	14	0.00212475	0.285714	GO:0071900	GO:BP	regulation of protein serine/threonine kinase activity	60275
M1	0.0092153	24	6589	9	0.00136591	0.375	GO:0036293	GO:BP	response to decreased oxygen levels	60275
M1	0.0092153	24	6589	9	0.00136591	0.375	GO:0006544	GO:BP	glycine metabolic process	60275
M1	0.00954811	8	6589	5	0.00075884	0.625	GO:0010223	GO:BP	secondary shoot formation	60275
M1	0.00954811	8	6589	5	0.00075884	0.625	GO:0010346	GO:BP	shoot axis formation	60275
M1	0.00954811	39	6589	12	0.00182122	0.307692	GO:1901000	GO:BP	regulation of response to salt stress	60275
M1	0.00954811	488	6589	77	0.0116861	0.157787	GO:1901605	GO:BP	alpha-amino acid metabolic process	60275
M1	0.00957878	97	6589	22	0.0033389	0.226804	GO:0043094	GO:BP	cellular metabolic compound salvage	60275
M1	0.00957878	775	6589	114	0.0173016	0.147097	GO:0044248	GO:BP	cellular catabolic process	60275
M1	0.00991909	50	6589	14	0.00212475	0.28	GO:0120254	GO:BP	olefinic compound metabolic process	60275
M1	0.0103291	289	6589	50	0.0075884	0.17301	GO:0005996	GO:BP	monosaccharide metabolic process	60275
M1	0.0106543	660	6589	99	0.015025	0.15	GO:0009605	GO:BP	response to external stimulus	60275
M1	0.0112601	137	6589	28	0.00424951	0.20438	GO:0009064	GO:BP	glutamine family amino acid metabolic process	60275
M1	0.0112601	1880	6589	249	0.0377903	0.132447	GO:1901575	GO:BP	organic substance catabolic process	60275
M1	0.0114614	80	6589	19	0.00288359	0.2375	GO:0009751	GO:BP	response to salicylic acid	60275
M1	0.0114773	40	6589	12	0.00182122	0.3	GO:0047484	GO:BP	regulation of response to osmotic stress	60275
M1	0.0114773	144	6589	29	0.00440127	0.201389	GO:0009735	GO:BP	response to cytokinin	60275
M1	0.0115732	12	6589	6	0.000910609	0.5	GO:0006546	GO:BP	glycine catabolic process	60275
M1	0.0115732	25	6589	9	0.00136591	0.36	GO:0070482	GO:BP	response to oxygen levels	60275
M1	0.0115732	25	6589	9	0.00136591	0.36	GO:0042044	GO:BP	fluid transport	60275
M1	0.0115732	25	6589	9	0.00136591	0.36	GO:0006833	GO:BP	water transport	60275
M1	0.0117246	35	6589	11	0.00166945	0.314286	GO:0046364	GO:BP	monosaccharide biosynthetic process	60275
M1	0.0117246	35	6589	11	0.00166945	0.314286	GO:0003333	GO:BP	amino acid transmembrane transport	60275
M1	0.0120456	336	6589	56	0.00849901	0.166667	GO:0009266	GO:BP	response to temperature stimulus	60275
M1	0.0120456	388	6589	63	0.00956139	0.162371	GO:0009314	GO:BP	response to radiation	60275
M1	0.0124303	46	6589	13	0.00197299	0.282609	GO:0042545	GO:BP	cell wall modification	60275
M1	0.0124303	81	6589	19	0.00288359	0.234568	GO:0010393	GO:BP	galacturonan metabolic process	60275
M1	0.0124303	81	6589	19	0.00288359	0.234568	GO:0045488	GO:BP	pectin metabolic process	60275
M1	0.0136017	41	6589	12	0.00182122	0.292683	GO:0006085	GO:BP	acetyl-CoA biosynthetic process	60275
M1	0.013754	21	6589	8	0.00121414	0.380952	GO:0009937	GO:BP	regulation of gibberellic acid mediated signaling pathway	60275
M1	0.013754	21	6589	8	0.00121414	0.380952	GO:0042548	GO:BP	regulation of photosynthesis, light reaction	60275
M1	0.0140749	3	6589	3	0.000455304	1	GO:0009972	GO:BP	cytidine deamination	60275
M1	0.0140749	3	6589	3	0.000455304	1	GO:0080141	GO:BP	regulation of jasmonic acid biosynthetic process	60275
M1	0.0140749	3	6589	3	0.000455304	1	GO:2000034	GO:BP	regulation of seed maturation	60275
M1	0.0140749	3	6589	3	0.000455304	1	GO:0006971	GO:BP	hypotonic response	60275
M1	0.0140749	3	6589	3	0.000455304	1	GO:0046087	GO:BP	cytidine metabolic process	60275
M1	0.0140749	3	6589	3	0.000455304	1	GO:0046131	GO:BP	pyrimidine ribonucleoside metabolic process	60275
M1	0.0140749	3	6589	3	0.000455304	1	GO:0046135	GO:BP	pyrimidine nucleoside catabolic process	60275
M1	0.0140749	3	6589	3	0.000455304	1	GO:0010728	GO:BP	regulation of hydrogen peroxide biosynthetic process	60275
M1	0.0140749	3	6589	3	0.000455304	1	GO:0080140	GO:BP	regulation of jasmonic acid metabolic process	60275
M1	0.0140749	3	6589	3	0.000455304	1	GO:0046133	GO:BP	pyrimidine ribonucleoside catabolic process	60275
M1	0.0140749	3	6589	3	0.000455304	1	GO:0048870	GO:BP	cell motility	60275
M1	0.0140749	3	6589	3	0.000455304	1	GO:0080027	GO:BP	response to herbivore	60275
M1	0.0140749	3	6589	3	0.000455304	1	GO:0019048	GO:BP	modulation by virus of host process	60275
M1	0.0140749	3	6589	3	0.000455304	1	GO:2000693	GO:BP	positive regulation of seed maturation	60275
M1	0.0140749	3	6589	3	0.000455304	1	GO:0033274	GO:BP	response to vitamin B2	60275
M1	0.0140749	3	6589	3	0.000455304	1	GO:0044003	GO:BP	modulation by symbiont of host process	60275
M1	0.0140749	3	6589	3	0.000455304	1	GO:1903426	GO:BP	regulation of reactive oxygen species biosynthetic process	60275
M1	0.0140749	3	6589	3	0.000455304	1	GO:0006213	GO:BP	pyrimidine nucleoside metabolic process	60275
M1	0.0140749	3	6589	3	0.000455304	1	GO:0006216	GO:BP	cytidine catabolic process	60275
M1	0.0140749	3	6589	3	0.000455304	1	GO:0033273	GO:BP	response to vitamin	60275
M1	0.0140749	3	6589	3	0.000455304	1	GO:0080050	GO:BP	regulation of seed development	60275
M1	0.0140749	47	6589	13	0.00197299	0.276596	GO:0006740	GO:BP	NADPH regeneration	60275
M1	0.0140749	47	6589	13	0.00197299	0.276596	GO:0006098	GO:BP	pentose-phosphate shunt	60275
M1	0.0140749	76	6589	18	0.00273183	0.236842	GO:0048646	GO:BP	anatomical structure formation involved in morphogenesis	60275
M1	0.0140749	147	6589	29	0.00440127	0.197279	GO:0033013	GO:BP	tetrapyrrole metabolic process	60275
M1	0.0140749	161	6589	31	0.00470481	0.192547	GO:0042440	GO:BP	pigment metabolic process	60275
M1	0.0141928	9	6589	5	0.00075884	0.555556	GO:1901671	GO:BP	positive regulation of superoxide dismutase activity	60275
M1	0.0141928	9	6589	5	0.00075884	0.555556	GO:0001763	GO:BP	morphogenesis of a branching structure	60275
M1	0.0141928	9	6589	5	0.00075884	0.555556	GO:1901668	GO:BP	regulation of superoxide dismutase activity	60275
M1	0.0141928	17	6589	7	0.00106238	0.411765	GO:1901336	GO:BP	lactone biosynthetic process	60275
M1	0.014699	65	6589	16	0.00242829	0.246154	GO:0044550	GO:BP	secondary metabolite biosynthetic process	60275
M1	0.014713	5191	6589	633	0.0960692	0.121942	GO:0050896	GO:BP	response to stimulus	60275
M1	0.0150447	142	6589	28	0.00424951	0.197183	GO:0009311	GO:BP	oligosaccharide metabolic process	60275
M1	0.0150785	800	6589	115	0.0174533	0.14375	GO:0070887	GO:BP	cellular response to chemical stimulus	60275
M1	0.0154926	48	6589	13	0.00197299	0.270833	GO:1905039	GO:BP	carboxylic acid transmembrane transport	60275
M1	0.0154926	48	6589	13	0.00197299	0.270833	GO:1903825	GO:BP	organic acid transmembrane transport	60275
M1	0.0160422	32	6589	10	0.00151768	0.3125	GO:0006026	GO:BP	aminoglycan catabolic process	60275
M1	0.0160422	32	6589	10	0.00151768	0.3125	GO:0006030	GO:BP	chitin metabolic process	60275
M1	0.0160422	32	6589	10	0.00151768	0.3125	GO:1901072	GO:BP	glucosamine-containing compound catabolic process	60275
M1	0.0160422	32	6589	10	0.00151768	0.3125	GO:0006032	GO:BP	chitin catabolic process	60275
M1	0.0160422	32	6589	10	0.00151768	0.3125	GO:0006022	GO:BP	aminoglycan metabolic process	60275
M1	0.0160422	32	6589	10	0.00151768	0.3125	GO:0046348	GO:BP	amino sugar catabolic process	60275
M1	0.0163512	72	6589	17	0.00258006	0.236111	GO:0009698	GO:BP	phenylpropanoid metabolic process	60275
M1	0.0173071	6	6589	4	0.000607072	0.666667	GO:0071277	GO:BP	cellular response to calcium ion	60275
M1	0.0173071	6	6589	4	0.000607072	0.666667	GO:0033320	GO:BP	UDP-D-xylose biosynthetic process	60275
M1	0.0173071	6	6589	4	0.000607072	0.666667	GO:0033319	GO:BP	UDP-D-xylose metabolic process	60275
M1	0.0173071	6	6589	4	0.000607072	0.666667	GO:1900367	GO:BP	positive regulation of defense response to insect	60275
M1	0.0173071	6	6589	4	0.000607072	0.666667	GO:0051592	GO:BP	response to calcium ion	60275
M1	0.0201309	33	6589	10	0.00151768	0.30303	GO:0015718	GO:BP	monocarboxylic acid transport	60275
M1	0.0203262	44	6589	12	0.00182122	0.272727	GO:0006865	GO:BP	amino acid transport	60275
M1	0.0203262	44	6589	12	0.00182122	0.272727	GO:0009627	GO:BP	systemic acquired resistance	60275
M1	0.020772	23	6589	8	0.00121414	0.347826	GO:0030245	GO:BP	cellulose catabolic process	60275
M1	0.020772	23	6589	8	0.00121414	0.347826	GO:0051275	GO:BP	beta-glucan catabolic process	60275
M1	0.021311	50	6589	13	0.00197299	0.26	GO:0051156	GO:BP	glucose 6-phosphate metabolic process	60275
M1	0.0218638	14	6589	6	0.000910609	0.428571	GO:0010310	GO:BP	regulation of hydrogen peroxide metabolic process	60275
M1	0.0218638	14	6589	6	0.000910609	0.428571	GO:0071470	GO:BP	cellular response to osmotic stress	60275
M1	0.0218638	14	6589	6	0.000910609	0.428571	GO:0006000	GO:BP	fructose metabolic process	60275
M1	0.0222982	39	6589	11	0.00166945	0.282051	GO:0034219	GO:BP	carbohydrate transmembrane transport	60275
M1	0.0226028	10	6589	5	0.00075884	0.5	GO:0010200	GO:BP	response to chitin	60275
M1	0.0245425	34	6589	10	0.00151768	0.294118	GO:1901071	GO:BP	glucosamine-containing compound metabolic process	60275
M1	0.0260604	19	6589	7	0.00106238	0.368421	GO:0030091	GO:BP	protein repair	60275
M1	0.0262665	29	6589	9	0.00136591	0.310345	GO:0009740	GO:BP	gibberellic acid mediated signaling pathway	60275
M1	0.0268928	24	6589	8	0.00121414	0.333333	GO:0019319	GO:BP	hexose biosynthetic process	60275
M1	0.0268928	24	6589	8	0.00121414	0.333333	GO:0006094	GO:BP	gluconeogenesis	60275
M1	0.0273487	163	6589	30	0.00455304	0.184049	GO:0006096	GO:BP	glycolytic process	60275
M1	0.0284731	46	6589	12	0.00182122	0.26087	GO:0035384	GO:BP	thioester biosynthetic process	60275
M1	0.0284731	46	6589	12	0.00182122	0.26087	GO:0071616	GO:BP	acyl-CoA biosynthetic process	60275
M1	0.0291476	109	6589	22	0.0033389	0.201835	GO:0019748	GO:BP	secondary metabolic process	60275
M1	0.0313201	15	6589	6	0.000910609	0.4	GO:0080112	GO:BP	seed growth	60275
M1	0.0313201	15	6589	6	0.000910609	0.4	GO:0010218	GO:BP	response to far red light	60275
M1	0.0315549	90	6589	19	0.00288359	0.211111	GO:0042445	GO:BP	hormone metabolic process	60275
M1	0.0322817	30	6589	9	0.00136591	0.3	GO:0010476	GO:BP	gibberellin mediated signaling pathway	60275
M1	0.0322817	30	6589	9	0.00136591	0.3	GO:0071370	GO:BP	cellular response to gibberellin stimulus	60275
M1	0.0322817	41	6589	11	0.00166945	0.268293	GO:0006002	GO:BP	fructose 6-phosphate metabolic process	60275
M1	0.0327287	7	6589	4	0.000607072	0.571429	GO:0090333	GO:BP	regulation of stomatal closure	60275
M1	0.0327287	65	6589	15	0.00227652	0.230769	GO:0006739	GO:BP	NADP metabolic process	60275
M1	0.0327287	194	6589	34	0.00516012	0.175258	GO:0046395	GO:BP	carboxylic acid catabolic process	60275
M1	0.0327287	194	6589	34	0.00516012	0.175258	GO:0016054	GO:BP	organic acid catabolic process	60275
M1	0.0327314	245	6589	41	0.00622249	0.167347	GO:0009733	GO:BP	response to auxin	60275
M1	0.034591	11	6589	5	0.00075884	0.454545	GO:0010206	GO:BP	photosystem II repair	60275
M1	0.0353395	36	6589	10	0.00151768	0.277778	GO:0045490	GO:BP	pectin catabolic process	60275
M1	0.0353395	36	6589	10	0.00151768	0.277778	GO:0006559	GO:BP	L-phenylalanine catabolic process	60275
M1	0.0353395	36	6589	10	0.00151768	0.277778	GO:1902222	GO:BP	erythrose 4-phosphate/phosphoenolpyruvate family amino acid catabolic process	60275
M1	0.038181	60	6589	14	0.00212475	0.233333	GO:0042537	GO:BP	benzene-containing compound metabolic process	60275
M1	0.039866	4	6589	3	0.000455304	0.75	GO:0010315	GO:BP	auxin export across the plasma membrane	60275
M1	0.0401147	133	6589	25	0.0037942	0.18797	GO:0140115	GO:BP	export across plasma membrane	60275
M1	0.0411184	16	6589	6	0.000910609	0.375	GO:0032890	GO:BP	regulation of organic acid transport	60275
M1	0.0411184	16	6589	6	0.000910609	0.375	GO:0051955	GO:BP	regulation of amino acid transport	60275
M1	0.0411184	16	6589	6	0.000910609	0.375	GO:0032973	GO:BP	amino acid export across plasma membrane	60275
M1	0.0411184	16	6589	6	0.000910609	0.375	GO:0051952	GO:BP	regulation of amine transport	60275
M1	0.0411184	16	6589	6	0.000910609	0.375	GO:1903789	GO:BP	regulation of amino acid transmembrane transport	60275
M1	0.0411184	16	6589	6	0.000910609	0.375	GO:0010114	GO:BP	response to red light	60275
M1	0.0411184	16	6589	6	0.000910609	0.375	GO:0046655	GO:BP	folic acid metabolic process	60275
M1	0.0411184	16	6589	6	0.000910609	0.375	GO:0080143	GO:BP	regulation of amino acid export	60275
M1	0.0411184	16	6589	6	0.000910609	0.375	GO:0015837	GO:BP	amine transport	60275
M1	0.0411184	1983	6589	253	0.0383973	0.127584	GO:0009056	GO:BP	catabolic process	60275
M1	0.0423561	61	6589	14	0.00212475	0.229508	GO:0072599	GO:BP	establishment of protein localization to endoplasmic reticulum	60275
M1	0.0423561	61	6589	14	0.00212475	0.229508	GO:0045047	GO:BP	protein targeting to ER	60275
M1	0.0433286	55	6589	13	0.00197299	0.236364	GO:0009251	GO:BP	glucan catabolic process	60275
M1	0.0440911	107	6589	21	0.00318713	0.196262	GO:0006749	GO:BP	glutathione metabolic process	60275
M1	0.046133	251	6589	41	0.00622249	0.163347	GO:0044282	GO:BP	small molecule catabolic process	60275
M1	0.0484064	200	6589	34	0.00516012	0.17	GO:0080134	GO:BP	regulation of response to stress	60275
M1	0.0491807	3211	6589	395	0.0599484	0.123015	GO:0071840	GO:BP	cellular component organization or biogenesis	60275
M1	0.0493189	12	6589	5	0.00075884	0.416667	GO:0071472	GO:BP	cellular response to salt stress	60275
M10	0.000971342	1350	183	16	0.0874317	0.0118519	GO:0006396	GO:BP	RNA processing	60275
M10	0.000971342	5934	183	39	0.213115	0.0065723	GO:0090304	GO:BP	nucleic acid metabolic process	60275
M10	0.0019722	5040	183	33	0.180328	0.00654762	GO:0016070	GO:BP	RNA metabolic process	60275
M10	0.0019722	6615	183	40	0.218579	0.00604686	GO:0006139	GO:BP	nucleobase-containing compound metabolic process	60275
M10	0.0019722	7135	183	42	0.229508	0.00588648	GO:0006725	GO:BP	cellular aromatic compound metabolic process	60275
M10	0.00218658	7283	183	42	0.229508	0.00576685	GO:1901360	GO:BP	organic cyclic compound metabolic process	60275
M10	0.00388937	229	183	6	0.0327869	0.0262009	GO:0008033	GO:BP	tRNA processing	60275
M10	0.00388937	437	183	8	0.0437158	0.0183066	GO:0006399	GO:BP	tRNA metabolic process	60275
M10	0.00388937	7076	183	40	0.218579	0.00565291	GO:0046483	GO:BP	heterocycle metabolic process	60275
M10	0.0199611	8230	183	42	0.229508	0.00510328	GO:0034641	GO:BP	cellular nitrogen compound metabolic process	60275
M10	0.0229725	331	183	6	0.0327869	0.0181269	GO:0000398	GO:BP	mRNA splicing, via spliceosome	60275
M10	0.0299093	796	183	9	0.0491803	0.0113065	GO:0034660	GO:BP	ncRNA metabolic process	60275
M10	0.0307765	648	183	8	0.0437158	0.0123457	GO:0016071	GO:BP	mRNA metabolic process	60275
M10	0.0321186	370	183	6	0.0327869	0.0162162	GO:0000377	GO:BP	RNA splicing, via transesterification reactions with bulged adenosine as nucleophile	60275
M10	0.032993	377	183	6	0.0327869	0.0159151	GO:0000375	GO:BP	RNA splicing, via transesterification reactions	60275
M10	0.0423402	160	183	4	0.0218579	0.025	GO:0006400	GO:BP	tRNA modification	60275
M10	0.0453986	6397	183	33	0.180328	0.00515867	GO:0010467	GO:BP	gene expression	60275
M11	1.48667e-08	58	169	7	0.0414201	0.12069	GO:0045861	GO:BP	negative regulation of proteolysis	60275
M11	1.48667e-08	57	169	7	0.0414201	0.122807	GO:0052548	GO:BP	regulation of endopeptidase activity	60275
M11	1.48667e-08	57	169	7	0.0414201	0.122807	GO:0052547	GO:BP	regulation of peptidase activity	60275
M11	1.48667e-08	57	169	7	0.0414201	0.122807	GO:0010466	GO:BP	negative regulation of peptidase activity	60275
M11	1.48667e-08	57	169	7	0.0414201	0.122807	GO:0010951	GO:BP	negative regulation of endopeptidase activity	60275
M11	6.48086e-08	73	169	7	0.0414201	0.0958904	GO:0051346	GO:BP	negative regulation of hydrolase activity	60275
M11	6.29522e-07	103	169	7	0.0414201	0.0679612	GO:0030162	GO:BP	regulation of proteolysis	60275
M11	1.77905e-06	126	169	7	0.0414201	0.0555556	GO:0044092	GO:BP	negative regulation of molecular function	60275
M11	1.77905e-06	124	169	7	0.0414201	0.0564516	GO:0043086	GO:BP	negative regulation of catalytic activity	60275
M11	1.77905e-06	125	169	7	0.0414201	0.056	GO:0051336	GO:BP	regulation of hydrolase activity	60275
M11	1.69019e-05	178	169	7	0.0414201	0.0393258	GO:0051248	GO:BP	negative regulation of protein metabolic process	60275
M11	0.000697432	319	169	7	0.0414201	0.0219436	GO:0051172	GO:BP	negative regulation of nitrogen compound metabolic process	60275
M11	0.000710224	324	169	7	0.0414201	0.0216049	GO:0050790	GO:BP	regulation of catalytic activity	60275
M11	0.000726321	329	169	7	0.0414201	0.0212766	GO:0065009	GO:BP	regulation of molecular function	60275
M11	0.000885664	603	169	9	0.0532544	0.0149254	GO:0010605	GO:BP	negative regulation of macromolecule metabolic process	60275
M11	0.00113054	628	169	9	0.0532544	0.0143312	GO:0009892	GO:BP	negative regulation of metabolic process	60275
M11	0.00267179	419	169	7	0.0414201	0.0167064	GO:0051246	GO:BP	regulation of protein metabolic process	60275
M11	0.00698011	3624	169	22	0.130178	0.00607064	GO:0060255	GO:BP	regulation of macromolecule metabolic process	60275
M11	0.00892677	853	169	9	0.0532544	0.010551	GO:0048519	GO:BP	negative regulation of biological process	60275
M11	0.00954946	153	169	4	0.0236686	0.0261438	GO:0000272	GO:BP	polysaccharide catabolic process	60275
M11	0.00954946	3285	169	20	0.118343	0.00608828	GO:0051171	GO:BP	regulation of nitrogen compound metabolic process	60275
M11	0.00954946	3768	169	22	0.130178	0.00583864	GO:0019222	GO:BP	regulation of metabolic process	60275
M11	0.0105531	3324	169	20	0.118343	0.00601685	GO:0080090	GO:BP	regulation of primary metabolic process	60275
M14	0.00330898	229	134	6	0.0447761	0.0262009	GO:0008033	GO:BP	tRNA processing	60275
M14	0.00330898	583	134	9	0.0671642	0.0154374	GO:0034470	GO:BP	ncRNA processing	60275
M14	0.00964481	95	134	4	0.0298507	0.0421053	GO:0042273	GO:BP	ribosomal large subunit biogenesis	60275
M14	0.00964481	796	134	9	0.0671642	0.0113065	GO:0034660	GO:BP	ncRNA metabolic process	60275
M14	0.0187267	52	134	3	0.0223881	0.0576923	GO:0000470	GO:BP	maturation of LSU-rRNA	60275
M14	0.0187267	1350	134	11	0.0820896	0.00814815	GO:0006396	GO:BP	RNA processing	60275
M14	0.0323611	437	134	6	0.0447761	0.01373	GO:0006399	GO:BP	tRNA metabolic process	60275
M16	0.000209176	101	111	5	0.045045	0.049505	GO:0016571	GO:BP	histone methylation	60275
M16	0.000209176	90	111	5	0.045045	0.0555556	GO:0034968	GO:BP	histone lysine methylation	60275
M16	0.000209176	104	111	5	0.045045	0.0480769	GO:0018022	GO:BP	peptidyl-lysine methylation	60275
M16	0.000912841	162	111	5	0.045045	0.0308642	GO:0006479	GO:BP	protein methylation	60275
M16	0.000912841	162	111	5	0.045045	0.0308642	GO:0008213	GO:BP	protein alkylation	60275
M16	0.00159939	188	111	5	0.045045	0.0265957	GO:0018205	GO:BP	peptidyl-lysine modification	60275
M16	0.00204531	37	111	3	0.027027	0.0810811	GO:0048284	GO:BP	organelle fusion	60275
M16	0.00238896	225	111	5	0.045045	0.0222222	GO:0016570	GO:BP	histone modification	60275
M16	0.00899732	320	111	5	0.045045	0.015625	GO:0043414	GO:BP	macromolecule methylation	60275
M16	0.0169127	392	111	5	0.045045	0.0127551	GO:0018193	GO:BP	peptidyl-amino acid modification	60275
M16	0.0169127	388	111	5	0.045045	0.0128866	GO:0032259	GO:BP	methylation	60275
M17	5.16314e-05	36	29	3	0.103448	0.0833333	GO:1902222	GO:BP	erythrose 4-phosphate/phosphoenolpyruvate family amino acid catabolic process	60275
M17	5.16314e-05	36	29	3	0.103448	0.0833333	GO:0006559	GO:BP	L-phenylalanine catabolic process	60275
M17	9.33358e-05	59	29	3	0.103448	0.0508475	GO:0006558	GO:BP	L-phenylalanine metabolic process	60275
M17	9.33358e-05	58	29	3	0.103448	0.0517241	GO:0009074	GO:BP	aromatic amino acid family catabolic process	60275
M17	9.33358e-05	59	29	3	0.103448	0.0508475	GO:1902221	GO:BP	erythrose 4-phosphate/phosphoenolpyruvate family amino acid metabolic process	60275
M17	0.000637873	125	29	3	0.103448	0.024	GO:0009063	GO:BP	amino acid catabolic process	60275
M17	0.000637873	124	29	3	0.103448	0.0241935	GO:1901606	GO:BP	alpha-amino acid catabolic process	60275
M17	0.00100154	164	29	3	0.103448	0.0182927	GO:0009072	GO:BP	aromatic amino acid metabolic process	60275
M17	0.00137211	194	29	3	0.103448	0.0154639	GO:0046395	GO:BP	carboxylic acid catabolic process	60275
M17	0.00137211	194	29	3	0.103448	0.0154639	GO:0016054	GO:BP	organic acid catabolic process	60275
M17	0.00234228	251	29	3	0.103448	0.0119522	GO:0044282	GO:BP	small molecule catabolic process	60275
M17	0.00315373	295	29	3	0.103448	0.0101695	GO:0019439	GO:BP	aromatic compound catabolic process	60275
M17	0.00320545	303	29	3	0.103448	0.00990099	GO:1901361	GO:BP	organic cyclic compound catabolic process	60275
M17	0.010461	488	29	3	0.103448	0.00614754	GO:1901605	GO:BP	alpha-amino acid metabolic process	60275
M17	0.0366968	775	29	3	0.103448	0.00387097	GO:0044248	GO:BP	cellular catabolic process	60275
M17	0.0460646	867	29	3	0.103448	0.00346021	GO:0006520	GO:BP	amino acid metabolic process	60275
M19	1.36235e-18	57	63	10	0.15873	0.175439	GO:0052548	GO:BP	regulation of endopeptidase activity	60275
M19	1.36235e-18	57	63	10	0.15873	0.175439	GO:0052547	GO:BP	regulation of peptidase activity	60275
M19	1.36235e-18	57	63	10	0.15873	0.175439	GO:0010466	GO:BP	negative regulation of peptidase activity	60275
M19	1.36235e-18	57	63	10	0.15873	0.175439	GO:0010951	GO:BP	negative regulation of endopeptidase activity	60275
M19	1.36235e-18	58	63	10	0.15873	0.172414	GO:0045861	GO:BP	negative regulation of proteolysis	60275
M19	1.33572e-17	73	63	10	0.15873	0.136986	GO:0051346	GO:BP	negative regulation of hydrolase activity	60275
M19	4.24398e-16	103	63	10	0.15873	0.0970874	GO:0030162	GO:BP	regulation of proteolysis	60275
M19	2.38182e-15	126	63	10	0.15873	0.0793651	GO:0044092	GO:BP	negative regulation of molecular function	60275
M19	2.38182e-15	125	63	10	0.15873	0.08	GO:0051336	GO:BP	regulation of hydrolase activity	60275
M19	2.38182e-15	124	63	10	0.15873	0.0806452	GO:0043086	GO:BP	negative regulation of catalytic activity	60275
M19	7.33302e-14	178	63	10	0.15873	0.0561798	GO:0051248	GO:BP	negative regulation of protein metabolic process	60275
M19	2.30168e-11	319	63	10	0.15873	0.031348	GO:0051172	GO:BP	negative regulation of nitrogen compound metabolic process	60275
M19	2.4777e-11	324	63	10	0.15873	0.0308642	GO:0050790	GO:BP	regulation of catalytic activity	60275
M19	2.49806e-11	329	63	10	0.15873	0.0303951	GO:0065009	GO:BP	regulation of molecular function	60275
M19	2.49806e-11	1753	63	17	0.269841	0.00969766	GO:0006508	GO:BP	proteolysis	60275
M19	2.51989e-10	419	63	10	0.15873	0.0238663	GO:0051246	GO:BP	regulation of protein metabolic process	60275
M19	8.05977e-09	603	63	10	0.15873	0.0165837	GO:0010605	GO:BP	negative regulation of macromolecule metabolic process	60275
M19	1.12331e-08	628	63	10	0.15873	0.0159236	GO:0009892	GO:BP	negative regulation of metabolic process	60275
M19	1.9345e-07	853	63	10	0.15873	0.0117233	GO:0048519	GO:BP	negative regulation of biological process	60275
M19	0.000271739	3285	63	13	0.206349	0.00395738	GO:0051171	GO:BP	regulation of nitrogen compound metabolic process	60275
M19	0.000292544	3324	63	13	0.206349	0.00391095	GO:0080090	GO:BP	regulation of primary metabolic process	60275
M19	0.000676828	3624	63	13	0.206349	0.0035872	GO:0060255	GO:BP	regulation of macromolecule metabolic process	60275
M19	0.000958076	3768	63	13	0.206349	0.00345011	GO:0019222	GO:BP	regulation of metabolic process	60275
M19	0.0044611	7600	63	18	0.285714	0.00236842	GO:0019538	GO:BP	protein metabolic process	60275
M19	0.00680343	183	63	3	0.047619	0.0163934	GO:0042744	GO:BP	hydrogen peroxide catabolic process	60275
M19	0.00680343	9330	63	20	0.31746	0.00214362	GO:1901564	GO:BP	organonitrogen compound metabolic process	60275
M19	0.00809811	197	63	3	0.047619	0.0152284	GO:0042743	GO:BP	hydrogen peroxide metabolic process	60275
M19	0.014041	242	63	3	0.047619	0.0123967	GO:0072593	GO:BP	reactive oxygen species metabolic process	60275
M19	0.0182287	5284	63	13	0.206349	0.00246026	GO:0050789	GO:BP	regulation of biological process	60275
M19	0.0272674	5559	63	13	0.206349	0.00233855	GO:0065007	GO:BP	biological regulation	60275
M19	0.0385536	370	63	3	0.047619	0.00810811	GO:0006979	GO:BP	response to oxidative stress	60275
M19	0.0443691	775	63	4	0.0634921	0.00516129	GO:0044248	GO:BP	cellular catabolic process	60275
M2	8.96476e-29	460	3042	95	0.0312295	0.206522	GO:0042254	GO:BP	ribosome biogenesis	60275
M2	3.37249e-28	584	3042	107	0.0351742	0.183219	GO:0022613	GO:BP	ribonucleoprotein complex biogenesis	60275
M2	1.25599e-21	316	3042	68	0.0223537	0.21519	GO:0006364	GO:BP	rRNA processing	60275
M2	2.01601e-21	320	3042	68	0.0223537	0.2125	GO:0016072	GO:BP	rRNA metabolic process	60275
M2	4.1679e-18	1350	3042	153	0.0502959	0.113333	GO:0006396	GO:BP	RNA processing	60275
M2	4.64367e-18	583	3042	89	0.0292571	0.152659	GO:0034470	GO:BP	ncRNA processing	60275
M2	2.81167e-12	796	3042	95	0.0312295	0.119347	GO:0034660	GO:BP	ncRNA metabolic process	60275
M2	6.90038e-08	1065	3042	103	0.0338593	0.0967136	GO:0009628	GO:BP	response to abiotic stimulus	60275
M2	8.99248e-08	1570	3042	137	0.0450362	0.0872611	GO:0044085	GO:BP	cellular component biogenesis	60275
M2	2.83214e-07	95	3042	22	0.00723208	0.231579	GO:0042273	GO:BP	ribosomal large subunit biogenesis	60275
M2	5.10426e-07	52	3042	16	0.0052597	0.307692	GO:0000470	GO:BP	maturation of LSU-rRNA	60275
M2	5.46574e-07	817	3042	82	0.026956	0.100367	GO:1901700	GO:BP	response to oxygen-containing compound	60275
M2	1.32735e-06	268	3042	38	0.0124918	0.141791	GO:0009737	GO:BP	response to abscisic acid	60275
M2	1.32735e-06	268	3042	38	0.0124918	0.141791	GO:0097305	GO:BP	response to alcohol	60275
M2	1.37035e-06	57	3042	16	0.0052597	0.280702	GO:0010466	GO:BP	negative regulation of peptidase activity	60275
M2	1.37035e-06	57	3042	16	0.0052597	0.280702	GO:0052548	GO:BP	regulation of endopeptidase activity	60275
M2	1.37035e-06	57	3042	16	0.0052597	0.280702	GO:0010951	GO:BP	negative regulation of endopeptidase activity	60275
M2	1.37035e-06	57	3042	16	0.0052597	0.280702	GO:0052547	GO:BP	regulation of peptidase activity	60275
M2	1.5625e-06	6	3042	6	0.00197239	1	GO:0000493	GO:BP	box H/ACA snoRNP assembly	60275
M2	1.62323e-06	58	3042	16	0.0052597	0.275862	GO:0045861	GO:BP	negative regulation of proteolysis	60275
M2	2.01539e-06	231	3042	34	0.0111769	0.147186	GO:0048316	GO:BP	seed development	60275
M2	3.58468e-06	271	3042	37	0.0121631	0.136531	GO:0009415	GO:BP	response to water	60275
M2	3.89132e-06	238	3042	34	0.0111769	0.142857	GO:0010154	GO:BP	fruit development	60275
M2	4.8237e-06	275	3042	37	0.0121631	0.134545	GO:0001101	GO:BP	response to acid chemical	60275
M2	6.84393e-06	291	3042	38	0.0124918	0.130584	GO:1902074	GO:BP	response to salt	60275
M2	7.96812e-06	169	3042	27	0.00887574	0.159763	GO:0009793	GO:BP	embryo development ending in seed dormancy	60275
M2	1.10937e-05	172	3042	27	0.00887574	0.156977	GO:0009790	GO:BP	embryo development	60275
M2	2.42673e-05	147	3042	24	0.00788955	0.163265	GO:0009408	GO:BP	response to heat	60275
M2	2.62431e-05	8	3042	6	0.00197239	0.75	GO:0000491	GO:BP	small nucleolar ribonucleoprotein complex assembly	60275
M2	3.10432e-05	34	3042	11	0.00361604	0.323529	GO:0000154	GO:BP	rRNA modification	60275
M2	3.2288e-05	453	3042	49	0.0161078	0.108168	GO:0009451	GO:BP	RNA modification	60275
M2	3.25675e-05	73	3042	16	0.0052597	0.219178	GO:0051346	GO:BP	negative regulation of hydrolase activity	60275
M2	7.89434e-05	69	3042	15	0.00493097	0.217391	GO:0001522	GO:BP	pseudouridine synthesis	60275
M2	8.68451e-05	107	3042	19	0.00624589	0.17757	GO:0001510	GO:BP	RNA methylation	60275
M2	0.000105861	6615	3042	414	0.136095	0.062585	GO:0006139	GO:BP	nucleobase-containing compound metabolic process	60275
M2	0.0001463	620	3042	59	0.0193951	0.0951613	GO:0009791	GO:BP	post-embryonic development	60275
M2	0.000148291	20	3042	8	0.00262985	0.4	GO:0031146	GO:BP	SCF-dependent proteasomal ubiquitin-dependent protein catabolic process	60275
M2	0.000196481	124	3042	20	0.00657462	0.16129	GO:0043086	GO:BP	negative regulation of catalytic activity	60275
M2	0.000216654	5040	3042	323	0.10618	0.0640873	GO:0016070	GO:BP	RNA metabolic process	60275
M2	0.000216654	5934	3042	373	0.122617	0.0628581	GO:0090304	GO:BP	nucleic acid metabolic process	60275
M2	0.00023398	126	3042	20	0.00657462	0.15873	GO:0044092	GO:BP	negative regulation of molecular function	60275
M2	0.000271821	4	3042	4	0.00131492	1	GO:0001906	GO:BP	cell killing	60275
M2	0.000271821	4	3042	4	0.00131492	1	GO:0031640	GO:BP	killing of cells of another organism	60275
M2	0.000289051	22	3042	8	0.00262985	0.363636	GO:0000463	GO:BP	maturation of LSU-rRNA from tricistronic rRNA transcript (SSU-rRNA, 5.8S rRNA, LSU-rRNA)	60275
M2	0.000340225	336	3042	37	0.0121631	0.110119	GO:0009266	GO:BP	response to temperature stimulus	60275
M2	0.000372719	23	3042	8	0.00262985	0.347826	GO:0042593	GO:BP	glucose homeostasis	60275
M2	0.000372719	23	3042	8	0.00262985	0.347826	GO:0001678	GO:BP	intracellular glucose homeostasis	60275
M2	0.000372719	23	3042	8	0.00262985	0.347826	GO:0033500	GO:BP	carbohydrate homeostasis	60275
M2	0.000372719	433	3042	44	0.0144642	0.101617	GO:0033993	GO:BP	response to lipid	60275
M2	0.000372719	530	3042	51	0.0167653	0.0962264	GO:0003006	GO:BP	developmental process involved in reproduction	60275
M2	0.000392481	1260	3042	99	0.0325444	0.0785714	GO:0010033	GO:BP	response to organic substance	60275
M2	0.000410455	178	3042	24	0.00788955	0.134831	GO:0051248	GO:BP	negative regulation of protein metabolic process	60275
M2	0.000527515	8	3042	5	0.00164366	0.625	GO:0030307	GO:BP	positive regulation of cell growth	60275
M2	0.000527515	103	3042	17	0.00558843	0.165049	GO:0030162	GO:BP	regulation of proteolysis	60275
M2	0.000527515	205	3042	26	0.00854701	0.126829	GO:0071826	GO:BP	ribonucleoprotein complex subunit organization	60275
M2	0.000550491	125	3042	19	0.00624589	0.152	GO:0051336	GO:BP	regulation of hydrolase activity	60275
M2	0.00055186	39	3042	10	0.00328731	0.25641	GO:0006188	GO:BP	IMP biosynthetic process	60275
M2	0.000563524	486	3042	47	0.0154504	0.0967078	GO:0048608	GO:BP	reproductive structure development	60275
M2	0.000563524	486	3042	47	0.0154504	0.0967078	GO:0061458	GO:BP	reproductive system development	60275
M2	0.000563524	7135	3042	434	0.142669	0.0608269	GO:0006725	GO:BP	cellular aromatic compound metabolic process	60275
M2	0.000611361	75	3042	14	0.00460224	0.186667	GO:0009156	GO:BP	ribonucleoside monophosphate biosynthetic process	60275
M2	0.000645914	40	3042	10	0.00328731	0.25	GO:0046040	GO:BP	IMP metabolic process	60275
M2	0.000690381	76	3042	14	0.00460224	0.184211	GO:0009161	GO:BP	ribonucleoside monophosphate metabolic process	60275
M2	0.000690381	477	3042	46	0.0151216	0.0964361	GO:0010035	GO:BP	response to inorganic substance	60275
M2	0.000962294	9	3042	5	0.00164366	0.555556	GO:0006020	GO:BP	inositol metabolic process	60275
M2	0.000967502	7076	3042	428	0.140697	0.0604862	GO:0046483	GO:BP	heterocycle metabolic process	60275
M2	0.00112146	375	3042	38	0.0124918	0.101333	GO:0006457	GO:BP	protein folding	60275
M2	0.00122119	101	3042	16	0.0052597	0.158416	GO:0009123	GO:BP	nucleoside monophosphate metabolic process	60275
M2	0.00144969	15	3042	6	0.00197239	0.4	GO:0035821	GO:BP	modulation of process of another organism	60275
M2	0.0015305	7283	3042	437	0.143655	0.0600027	GO:1901360	GO:BP	organic cyclic compound metabolic process	60275
M2	0.0016156	93	3042	15	0.00493097	0.16129	GO:0009124	GO:BP	nucleoside monophosphate biosynthetic process	60275
M2	0.00186151	199	3042	24	0.00788955	0.120603	GO:0006913	GO:BP	nucleocytoplasmic transport	60275
M2	0.00194433	8230	3042	487	0.160092	0.0591738	GO:0034641	GO:BP	cellular nitrogen compound metabolic process	60275
M2	0.0021898	30	3042	8	0.00262985	0.266667	GO:0006189	GO:BP	'de novo' IMP biosynthetic process	60275
M2	0.00247651	3211	3042	209	0.0687048	0.0650888	GO:0071840	GO:BP	cellular component organization or biogenesis	60275
M2	0.00281244	205	3042	24	0.00788955	0.117073	GO:0051169	GO:BP	nuclear transport	60275
M2	0.00297195	3	3042	3	0.000986193	1	GO:0035246	GO:BP	peptidyl-arginine N-methylation	60275
M2	0.00297195	3	3042	3	0.000986193	1	GO:2000469	GO:BP	negative regulation of peroxidase activity	60275
M2	0.00420688	60	3042	11	0.00361604	0.183333	GO:0009553	GO:BP	embryo sac development	60275
M2	0.00435613	319	3042	32	0.0105194	0.100313	GO:0051172	GO:BP	negative regulation of nitrogen compound metabolic process	60275
M2	0.00437715	199	3042	23	0.00756082	0.115578	GO:0022618	GO:BP	ribonucleoprotein complex assembly	60275
M2	0.00485927	706	3042	58	0.0190664	0.082153	GO:0022414	GO:BP	reproductive process	60275
M2	0.00505675	34	3042	8	0.00262985	0.235294	GO:0000460	GO:BP	maturation of 5.8S rRNA	60275
M2	0.00505831	52	3042	10	0.00328731	0.192308	GO:0009127	GO:BP	purine nucleoside monophosphate biosynthetic process	60275
M2	0.00505831	52	3042	10	0.00328731	0.192308	GO:0009168	GO:BP	purine ribonucleoside monophosphate biosynthetic process	60275
M2	0.00517965	1636	3042	115	0.0378041	0.0702934	GO:0042221	GO:BP	response to chemical	60275
M2	0.00534765	757	3042	61	0.0200526	0.0805812	GO:0048731	GO:BP	system development	60275
M2	0.0056872	53	3042	10	0.00328731	0.188679	GO:0009167	GO:BP	purine ribonucleoside monophosphate metabolic process	60275
M2	0.0056872	53	3042	10	0.00328731	0.188679	GO:0009126	GO:BP	purine nucleoside monophosphate metabolic process	60275
M2	0.00591537	13	3042	5	0.00164366	0.384615	GO:0010960	GO:BP	magnesium ion homeostasis	60275
M2	0.00591537	27	3042	7	0.00230112	0.259259	GO:0009631	GO:BP	cold acclimation	60275
M2	0.00591537	218	3042	24	0.00788955	0.110092	GO:0048878	GO:BP	chemical homeostasis	60275
M2	0.00730827	8	3042	4	0.00131492	0.5	GO:0010162	GO:BP	seed dormancy process	60275
M2	0.00730827	8	3042	4	0.00131492	0.5	GO:0022611	GO:BP	dormancy process	60275
M2	0.00730827	8	3042	4	0.00131492	0.5	GO:0036265	GO:BP	RNA (guanine-N7)-methylation	60275
M2	0.00892184	4	3042	3	0.000986193	0.75	GO:0051354	GO:BP	negative regulation of oxidoreductase activity	60275
M2	0.00892184	4	3042	3	0.000986193	0.75	GO:0045040	GO:BP	protein insertion into mitochondrial outer membrane	60275
M2	0.00892184	4	3042	3	0.000986193	0.75	GO:0070476	GO:BP	rRNA (guanine-N7)-methylation	60275
M2	0.00892184	4	3042	3	0.000986193	0.75	GO:0007008	GO:BP	outer mitochondrial membrane organization	60275
M2	0.00892184	29	3042	7	0.00230112	0.241379	GO:0018216	GO:BP	peptidyl-arginine methylation	60275
M2	0.00916059	746	3042	59	0.0193951	0.0790885	GO:0000003	GO:BP	reproduction	60275
M2	0.00946789	1234	3042	89	0.0292571	0.0721232	GO:0032501	GO:BP	multicellular organismal process	60275
M2	0.0115353	9	3042	4	0.00131492	0.444444	GO:0009584	GO:BP	detection of visible light	60275
M2	0.0115353	9	3042	4	0.00131492	0.444444	GO:0006607	GO:BP	NLS-bearing protein import into nucleus	60275
M2	0.0128227	31	3042	7	0.00230112	0.225806	GO:0018195	GO:BP	peptidyl-arginine modification	60275
M2	0.0134297	23	3042	6	0.00197239	0.26087	GO:0031167	GO:BP	rRNA methylation	60275
M2	0.0148759	94	3042	13	0.0042735	0.138298	GO:0009067	GO:BP	aspartate family amino acid biosynthetic process	60275
M2	0.0153002	320	3042	30	0.00986193	0.09375	GO:0043414	GO:BP	macromolecule methylation	60275
M2	0.0166743	24	3042	6	0.00197239	0.25	GO:0000469	GO:BP	cleavage involved in rRNA processing	60275
M2	0.0173193	42	3042	8	0.00262985	0.190476	GO:0006862	GO:BP	nucleotide transport	60275
M2	0.0191637	5	3042	3	0.000986193	0.6	GO:0000122	GO:BP	negative regulation of transcription by RNA polymerase II	60275
M2	0.0191637	5	3042	3	0.000986193	0.6	GO:2000468	GO:BP	regulation of peroxidase activity	60275
M2	0.0191827	17	3042	5	0.00164366	0.294118	GO:0006528	GO:BP	asparagine metabolic process	60275
M2	0.0191827	17	3042	5	0.00164366	0.294118	GO:0006529	GO:BP	asparagine biosynthetic process	60275
M2	0.0200206	122	3042	15	0.00493097	0.122951	GO:0090305	GO:BP	nucleic acid phosphodiester bond hydrolysis	60275
M2	0.0226921	76	3042	11	0.00361604	0.144737	GO:0006606	GO:BP	protein import into nucleus	60275
M2	0.0226921	76	3042	11	0.00361604	0.144737	GO:0034504	GO:BP	protein localization to nucleus	60275
M2	0.0239575	26	3042	6	0.00197239	0.230769	GO:0006744	GO:BP	ubiquinone biosynthetic process	60275
M2	0.0239575	26	3042	6	0.00197239	0.230769	GO:0006743	GO:BP	ubiquinone metabolic process	60275
M2	0.0241341	11	3042	4	0.00131492	0.363636	GO:0019915	GO:BP	lipid storage	60275
M2	0.0275987	1068	3042	76	0.0249836	0.071161	GO:0007275	GO:BP	multicellular organism development	60275
M2	0.0299207	79	3042	11	0.00361604	0.139241	GO:0051170	GO:BP	import into nucleus	60275
M2	0.0308882	6	3042	3	0.000986193	0.5	GO:0006522	GO:BP	alanine metabolic process	60275
M2	0.0308882	6	3042	3	0.000986193	0.5	GO:0006021	GO:BP	inositol biosynthetic process	60275
M2	0.0308882	6	3042	3	0.000986193	0.5	GO:0006007	GO:BP	glucose catabolic process	60275
M2	0.0308882	6	3042	3	0.000986193	0.5	GO:0032988	GO:BP	ribonucleoprotein complex disassembly	60275
M2	0.0308882	6	3042	3	0.000986193	0.5	GO:0000390	GO:BP	spliceosomal complex disassembly	60275
M2	0.0308882	6	3042	3	0.000986193	0.5	GO:0006524	GO:BP	alanine catabolic process	60275
M2	0.0308882	6	3042	3	0.000986193	0.5	GO:0009080	GO:BP	pyruvate family amino acid catabolic process	60275
M2	0.0308882	6	3042	3	0.000986193	0.5	GO:0042853	GO:BP	L-alanine catabolic process	60275
M2	0.0308882	6	3042	3	0.000986193	0.5	GO:0042851	GO:BP	L-alanine metabolic process	60275
M2	0.0308882	6	3042	3	0.000986193	0.5	GO:0009078	GO:BP	pyruvate family amino acid metabolic process	60275
M2	0.0308882	12	3042	4	0.00131492	0.333333	GO:0006303	GO:BP	double-strand break repair via nonhomologous end joining	60275
M2	0.0308882	12	3042	4	0.00131492	0.333333	GO:0017006	GO:BP	protein-tetrapyrrole linkage	60275
M2	0.0308882	324	3042	29	0.0095332	0.0895062	GO:0050790	GO:BP	regulation of catalytic activity	60275
M2	0.0308882	6397	3042	371	0.121959	0.0579959	GO:0010467	GO:BP	gene expression	60275
M2	0.0312333	28	3042	6	0.00197239	0.214286	GO:0010029	GO:BP	regulation of seed germination	60275
M2	0.0335292	20	3042	5	0.00164366	0.25	GO:0009749	GO:BP	response to glucose	60275
M2	0.0342059	329	3042	29	0.0095332	0.0881459	GO:0065009	GO:BP	regulation of molecular function	60275
M2	0.0342059	1271	3042	87	0.0285996	0.06845	GO:0048856	GO:BP	anatomical structure development	60275
M2	0.0347718	5191	3042	305	0.100263	0.0587555	GO:0050896	GO:BP	response to stimulus	60275
M2	0.0349152	29	3042	6	0.00197239	0.206897	GO:1900140	GO:BP	regulation of seedling development	60275
M2	0.0351126	107	3042	13	0.0042735	0.121495	GO:0009066	GO:BP	aspartate family amino acid metabolic process	60275
M2	0.038358	147	3042	16	0.0052597	0.108844	GO:0006413	GO:BP	translational initiation	60275
M2	0.0412274	122	3042	14	0.00460224	0.114754	GO:0050832	GO:BP	defense response to fungus	60275
M2	0.0412274	135	3042	15	0.00493097	0.111111	GO:0009620	GO:BP	response to fungus	60275
M2	0.0443206	7	3042	3	0.000986193	0.428571	GO:0035725	GO:BP	sodium ion transmembrane transport	60275
M2	0.0443206	7	3042	3	0.000986193	0.428571	GO:0032447	GO:BP	protein urmylation	60275
M2	0.0443206	7	3042	3	0.000986193	0.428571	GO:1902182	GO:BP	shoot apical meristem development	60275
M2	0.0443206	7	3042	3	0.000986193	0.428571	GO:1905181	GO:BP	regulation of urease activity	60275
M2	0.0443206	7	3042	3	0.000986193	0.428571	GO:1905182	GO:BP	positive regulation of urease activity	60275
M2	0.0449829	74	3042	10	0.00328731	0.135135	GO:0016226	GO:BP	iron-sulfur cluster assembly	60275
M2	0.0449829	74	3042	10	0.00328731	0.135135	GO:0031163	GO:BP	metallo-sulfur cluster assembly	60275
M2	0.0479036	14	3042	4	0.00131492	0.285714	GO:0007602	GO:BP	phototransduction	60275
M2	0.0479036	14	3042	4	0.00131492	0.285714	GO:0009646	GO:BP	response to absence of light	60275
M2	0.0479036	14	3042	4	0.00131492	0.285714	GO:0009585	GO:BP	red, far-red light phototransduction	60275
M2	0.0479036	125	3042	14	0.00460224	0.112	GO:0006302	GO:BP	double-strand break repair	60275
M2	0.0493259	251	3042	23	0.00756082	0.0916335	GO:0044282	GO:BP	small molecule catabolic process	60275
M21	0.00125795	44	51	3	0.0588235	0.0681818	GO:0009082	GO:BP	branched-chain amino acid biosynthetic process	60275
M21	0.00125795	54	51	3	0.0588235	0.0555556	GO:0009081	GO:BP	branched-chain amino acid metabolic process	60275
M21	0.00125795	687	51	6	0.117647	0.00873362	GO:0046394	GO:BP	carboxylic acid biosynthetic process	60275
M21	0.00125795	687	51	6	0.117647	0.00873362	GO:0016053	GO:BP	organic acid biosynthetic process	60275
M21	0.00264214	899	51	6	0.117647	0.00667408	GO:0044283	GO:BP	small molecule biosynthetic process	60275
M21	0.00320895	327	51	4	0.0784314	0.0122324	GO:0008652	GO:BP	amino acid biosynthetic process	60275
M21	0.0110312	488	51	4	0.0784314	0.00819672	GO:1901605	GO:BP	alpha-amino acid metabolic process	60275
M21	0.0110312	867	51	5	0.0980392	0.00576701	GO:0006520	GO:BP	amino acid metabolic process	60275
M21	0.0110312	20715	51	29	0.568627	0.00139995	GO:0009987	GO:BP	cellular process	60275
M21	0.0217455	14344	51	22	0.431373	0.00153374	GO:0044237	GO:BP	cellular metabolic process	60275
M21	0.022551	292	51	3	0.0588235	0.010274	GO:1901607	GO:BP	alpha-amino acid biosynthetic process	60275
M21	0.0232146	1610	51	6	0.117647	0.00372671	GO:0006082	GO:BP	organic acid metabolic process	60275
M21	0.0232146	1589	51	6	0.117647	0.00377596	GO:0019752	GO:BP	carboxylic acid metabolic process	60275
M21	0.0232146	1604	51	6	0.117647	0.00374065	GO:0043436	GO:BP	oxoacid metabolic process	60275
M21	0.0300866	3035	51	8	0.156863	0.00263591	GO:1901566	GO:BP	organonitrogen compound biosynthetic process	60275
M21	0.049539	4107	51	9	0.176471	0.00219138	GO:0006793	GO:BP	phosphorus metabolic process	60275
M22	0.0103253	290	44	4	0.0909091	0.0137931	GO:0006631	GO:BP	fatty acid metabolic process	60275
M22	0.0103253	621	44	5	0.113636	0.00805153	GO:0032787	GO:BP	monocarboxylic acid metabolic process	60275
M22	0.0269785	186	44	3	0.0681818	0.016129	GO:0006633	GO:BP	fatty acid biosynthetic process	60275
M22	0.0309068	252	44	3	0.0681818	0.0119048	GO:0072330	GO:BP	monocarboxylic acid biosynthetic process	60275
M22	0.0309068	1610	44	6	0.136364	0.00372671	GO:0006082	GO:BP	organic acid metabolic process	60275
M22	0.0309068	1589	44	6	0.136364	0.00377596	GO:0019752	GO:BP	carboxylic acid metabolic process	60275
M22	0.0309068	1604	44	6	0.136364	0.00374065	GO:0043436	GO:BP	oxoacid metabolic process	60275
M22	0.0309068	2706	44	8	0.181818	0.00295639	GO:0044281	GO:BP	small molecule metabolic process	60275
M23	2.987e-14	43	40	7	0.175	0.162791	GO:0042542	GO:BP	response to hydrogen peroxide	60275
M23	2.987e-14	147	40	9	0.225	0.0612245	GO:0009408	GO:BP	response to heat	60275
M23	2.68391e-12	39	40	6	0.15	0.153846	GO:0051259	GO:BP	protein complex oligomerization	60275
M23	2.68391e-12	85	40	7	0.175	0.0823529	GO:0000302	GO:BP	response to reactive oxygen species	60275
M23	1.27232e-11	336	40	9	0.225	0.0267857	GO:0009266	GO:BP	response to temperature stimulus	60275
M23	2.82937e-11	375	40	9	0.225	0.024	GO:0006457	GO:BP	protein folding	60275
M23	4.02737e-08	370	40	7	0.175	0.0189189	GO:0006979	GO:BP	response to oxidative stress	60275
M23	5.53954e-08	220	40	6	0.15	0.0272727	GO:0009651	GO:BP	response to salt stress	60275
M23	9.1209e-08	244	40	6	0.15	0.0245902	GO:0006970	GO:BP	response to osmotic stress	60275
M23	1.45948e-07	477	40	7	0.175	0.0146751	GO:0010035	GO:BP	response to inorganic substance	60275
M23	1.45948e-07	1065	40	9	0.225	0.0084507	GO:0009628	GO:BP	response to abiotic stimulus	60275
M23	5.00352e-06	817	40	7	0.175	0.00856793	GO:1901700	GO:BP	response to oxygen-containing compound	60275
M23	1.36191e-05	42	40	3	0.075	0.0714286	GO:0061077	GO:BP	chaperone-mediated protein folding	60275
M23	6.76879e-05	823	40	6	0.15	0.0072904	GO:0065003	GO:BP	protein-containing complex assembly	60275
M23	6.76879e-05	1260	40	7	0.175	0.00555556	GO:0010033	GO:BP	response to organic substance	60275
M23	0.000107856	915	40	6	0.15	0.00655738	GO:0043933	GO:BP	protein-containing complex organization	60275
M23	0.000254001	1080	40	6	0.15	0.00555556	GO:0022607	GO:BP	cellular component assembly	60275
M23	0.000293697	1636	40	7	0.175	0.00427873	GO:0042221	GO:BP	response to chemical	60275
M23	0.000647512	3221	40	9	0.225	0.00279416	GO:0006950	GO:BP	response to stress	60275
M23	0.00161285	1570	40	6	0.15	0.00382166	GO:0044085	GO:BP	cellular component biogenesis	60275
M23	0.0167082	5191	40	9	0.225	0.00173377	GO:0050896	GO:BP	response to stimulus	60275
M23	0.026256	2805	40	6	0.15	0.00213904	GO:0016043	GO:BP	cellular component organization	60275
M23	0.0381559	3211	40	6	0.15	0.00186858	GO:0071840	GO:BP	cellular component organization or biogenesis	60275
M26	0.000209325	153	35	4	0.114286	0.0261438	GO:0006417	GO:BP	regulation of translation	60275
M26	0.000209325	153	35	4	0.114286	0.0261438	GO:0034248	GO:BP	regulation of amide metabolic process	60275
M26	0.000350451	193	35	4	0.114286	0.0207254	GO:0010608	GO:BP	post-transcriptional regulation of gene expression	60275
M26	0.00541144	419	35	4	0.114286	0.00954654	GO:0051246	GO:BP	regulation of protein metabolic process	60275
M26	0.0247227	390	35	3	0.0857143	0.00769231	GO:0010629	GO:BP	negative regulation of gene expression	60275
M26	0.0247227	1497	35	5	0.142857	0.00334001	GO:0006412	GO:BP	translation	60275
M26	0.0247227	1515	35	5	0.142857	0.00330033	GO:0043043	GO:BP	peptide biosynthetic process	60275
M26	0.0265824	1609	35	5	0.142857	0.00310752	GO:0043604	GO:BP	amide biosynthetic process	60275
M26	0.0265824	1574	35	5	0.142857	0.00317662	GO:0006518	GO:BP	peptide metabolic process	60275
M26	0.0303947	6397	35	10	0.285714	0.00156323	GO:0010467	GO:BP	gene expression	60275
M26	0.0331057	1774	35	5	0.142857	0.00281849	GO:0043603	GO:BP	amide metabolic process	60275
M26	0.0405489	603	35	3	0.0857143	0.00497512	GO:0010605	GO:BP	negative regulation of macromolecule metabolic process	60275
M26	0.0408719	628	35	3	0.0857143	0.00477707	GO:0009892	GO:BP	negative regulation of metabolic process	60275
M26	0.0499556	5318	35	8	0.228571	0.00150432	GO:0009059	GO:BP	macromolecule biosynthetic process	60275
M3	1.1919e-47	1808	1706	183	0.107268	0.101217	GO:0005975	GO:BP	carbohydrate metabolic process	60275
M3	8.47599e-34	292	1706	63	0.0369285	0.215753	GO:0044042	GO:BP	glucan metabolic process	60275
M3	5.40912e-31	182	1706	49	0.0287222	0.269231	GO:0009250	GO:BP	glucan biosynthetic process	60275
M3	5.63246e-31	477	1706	75	0.0439625	0.157233	GO:0005976	GO:BP	polysaccharide metabolic process	60275
M3	7.68726e-28	79	1706	33	0.0193435	0.417722	GO:0005982	GO:BP	starch metabolic process	60275
M3	1.59935e-27	52	1706	28	0.0164127	0.538462	GO:0019252	GO:BP	starch biosynthetic process	60275
M3	9.26867e-27	257	1706	52	0.0304807	0.202335	GO:0000271	GO:BP	polysaccharide biosynthetic process	60275
M3	5.79839e-25	393	1706	61	0.0357562	0.155216	GO:0016051	GO:BP	carbohydrate biosynthetic process	60275
M3	2.13874e-22	34	1706	21	0.0123095	0.617647	GO:0005977	GO:BP	glycogen metabolic process	60275
M3	2.13874e-22	34	1706	21	0.0123095	0.617647	GO:0006112	GO:BP	energy reserve metabolic process	60275
M3	3.49289e-19	29	1706	18	0.010551	0.62069	GO:0005978	GO:BP	glycogen biosynthetic process	60275
M3	1.32607e-09	7	1706	7	0.00410317	1	GO:0010021	GO:BP	amylopectin biosynthetic process	60275
M3	1.32607e-09	7	1706	7	0.00410317	1	GO:2000896	GO:BP	amylopectin metabolic process	60275
M3	3.3425e-09	350	1706	36	0.021102	0.102857	GO:0016052	GO:BP	carbohydrate catabolic process	60275
M3	6.07003e-09	153	1706	23	0.0134818	0.150327	GO:0000272	GO:BP	polysaccharide catabolic process	60275
M3	7.97309e-09	229	1706	28	0.0164127	0.122271	GO:0000160	GO:BP	phosphorelay signal transduction system	60275
M3	2.08271e-08	55	1706	14	0.00820633	0.254545	GO:0009251	GO:BP	glucan catabolic process	60275
M3	1.6463e-07	138	1706	20	0.0117233	0.144928	GO:0051273	GO:BP	beta-glucan metabolic process	60275
M3	1.65878e-06	101	1706	16	0.00937866	0.158416	GO:0030243	GO:BP	cellulose metabolic process	60275
M3	3.24022e-06	266	1706	26	0.0152403	0.0977444	GO:0015980	GO:BP	energy derivation by oxidation of organic compounds	60275
M3	4.79187e-06	124	1706	17	0.00996483	0.137097	GO:0005984	GO:BP	disaccharide metabolic process	60275
M3	4.79187e-06	328	1706	29	0.0169988	0.0884146	GO:0071555	GO:BP	cell wall organization	60275
M3	1.00118e-05	483	1706	36	0.021102	0.0745342	GO:0035556	GO:BP	intracellular signal transduction	60275
M3	1.32215e-05	346	1706	29	0.0169988	0.083815	GO:0045229	GO:BP	external encapsulating structure organization	60275
M3	2.74317e-05	484	1706	35	0.0205158	0.072314	GO:0071554	GO:BP	cell wall organization or biogenesis	60275
M3	2.93032e-05	142	1706	17	0.00996483	0.119718	GO:0009311	GO:BP	oligosaccharide metabolic process	60275
M3	3.37376e-05	28	1706	8	0.00468933	0.285714	GO:0005983	GO:BP	starch catabolic process	60275
M3	3.57119e-05	161	1706	18	0.010551	0.111801	GO:0007018	GO:BP	microtubule-based movement	60275
M3	3.94172e-05	115	1706	15	0.0087925	0.130435	GO:0051274	GO:BP	beta-glucan biosynthetic process	60275
M3	0.000450106	140	1706	15	0.0087925	0.107143	GO:1903047	GO:BP	mitotic cell cycle process	60275
M3	0.000463286	12	1706	5	0.00293083	0.416667	GO:0009960	GO:BP	endosperm development	60275
M3	0.000463286	78	1706	11	0.00644783	0.141026	GO:0030244	GO:BP	cellulose biosynthetic process	60275
M3	0.000698435	13	1706	5	0.00293083	0.384615	GO:0032881	GO:BP	regulation of polysaccharide metabolic process	60275
M3	0.00184604	621	1706	36	0.021102	0.057971	GO:0032787	GO:BP	monocarboxylic acid metabolic process	60275
M3	0.00205547	62	1706	9	0.0052755	0.145161	GO:0005985	GO:BP	sucrose metabolic process	60275
M3	0.00239467	9	1706	4	0.00234467	0.444444	GO:0034975	GO:BP	protein folding in endoplasmic reticulum	60275
M3	0.00287183	4	1706	3	0.0017585	0.75	GO:0006011	GO:BP	UDP-glucose metabolic process	60275
M3	0.00317788	52	1706	8	0.00468933	0.153846	GO:0005991	GO:BP	trehalose metabolic process	60275
M3	0.00360128	10	1706	4	0.00234467	0.4	GO:0032776	GO:BP	DNA methylation on cytosine	60275
M3	0.00377014	29	1706	6	0.003517	0.206897	GO:0043062	GO:BP	extracellular structure organization	60275
M3	0.00377014	29	1706	6	0.003517	0.206897	GO:0010215	GO:BP	cellulose microfibril organization	60275
M3	0.00377014	29	1706	6	0.003517	0.206897	GO:0070726	GO:BP	cell wall assembly	60275
M3	0.00377014	29	1706	6	0.003517	0.206897	GO:0030198	GO:BP	extracellular matrix organization	60275
M3	0.00377014	29	1706	6	0.003517	0.206897	GO:0071668	GO:BP	plant-type cell wall assembly	60275
M3	0.00443234	324	1706	22	0.0128957	0.0679012	GO:0050790	GO:BP	regulation of catalytic activity	60275
M3	0.00459042	11	1706	4	0.00234467	0.363636	GO:0032885	GO:BP	regulation of polysaccharide biosynthetic process	60275
M3	0.00459042	11	1706	4	0.00234467	0.363636	GO:0010962	GO:BP	regulation of glucan biosynthetic process	60275
M3	0.00515341	329	1706	22	0.0128957	0.0668693	GO:0065009	GO:BP	regulation of molecular function	60275
M3	0.00517627	5	1706	3	0.0017585	0.6	GO:2001295	GO:BP	malonyl-CoA biosynthetic process	60275
M3	0.00517627	5	1706	3	0.0017585	0.6	GO:2001293	GO:BP	malonyl-CoA metabolic process	60275
M3	0.00517627	44	1706	7	0.00410317	0.159091	GO:0009082	GO:BP	branched-chain amino acid biosynthetic process	60275
M3	0.0081309	62	1706	8	0.00468933	0.129032	GO:0009664	GO:BP	plant-type cell wall organization	60275
M3	0.00881425	23	1706	5	0.00293083	0.217391	GO:0051275	GO:BP	beta-glucan catabolic process	60275
M3	0.00881425	23	1706	5	0.00293083	0.217391	GO:0030245	GO:BP	cellulose catabolic process	60275
M3	0.00892584	6	1706	3	0.0017585	0.5	GO:0015942	GO:BP	formate metabolic process	60275
M3	0.00892584	6	1706	3	0.0017585	0.5	GO:0042183	GO:BP	formate catabolic process	60275
M3	0.00892584	6	1706	3	0.0017585	0.5	GO:0051211	GO:BP	anisotropic cell growth	60275
M3	0.00892584	49	1706	7	0.00410317	0.142857	GO:0005992	GO:BP	trehalose biosynthetic process	60275
M3	0.00892584	64	1706	8	0.00468933	0.125	GO:0000819	GO:BP	sister chromatid segregation	60275
M3	0.0126224	52	1706	7	0.00410317	0.134615	GO:0000070	GO:BP	mitotic sister chromatid segregation	60275
M3	0.0135881	290	1706	19	0.0111372	0.0655172	GO:0006631	GO:BP	fatty acid metabolic process	60275
M3	0.0140653	7	1706	3	0.0017585	0.428571	GO:0090307	GO:BP	mitotic spindle assembly	60275
M3	0.0151531	54	1706	7	0.00410317	0.12963	GO:0009081	GO:BP	branched-chain amino acid metabolic process	60275
M3	0.0152673	124	1706	11	0.00644783	0.0887097	GO:0043086	GO:BP	negative regulation of catalytic activity	60275
M3	0.0152673	5559	1706	196	0.114889	0.0352581	GO:0065007	GO:BP	biological regulation	60275
M3	0.0154283	206	1706	15	0.0087925	0.0728155	GO:0000278	GO:BP	mitotic cell cycle	60275
M3	0.0158581	16	1706	4	0.00234467	0.25	GO:0007076	GO:BP	mitotic chromosome condensation	60275
M3	0.0166379	126	1706	11	0.00644783	0.0873016	GO:0044092	GO:BP	negative regulation of molecular function	60275
M3	0.0172528	56	1706	7	0.00410317	0.125	GO:0140014	GO:BP	mitotic nuclear division	60275
M3	0.0176068	8	1706	3	0.0017585	0.375	GO:0032951	GO:BP	regulation of beta-glucan biosynthetic process	60275
M3	0.0176068	8	1706	3	0.0017585	0.375	GO:0032950	GO:BP	regulation of beta-glucan metabolic process	60275
M3	0.0176068	8	1706	3	0.0017585	0.375	GO:2001006	GO:BP	regulation of cellulose biosynthetic process	60275
M3	0.0176068	8	1706	3	0.0017585	0.375	GO:0160062	GO:BP	cutin-based cuticle development	60275
M3	0.0176068	8	1706	3	0.0017585	0.375	GO:0010143	GO:BP	cutin biosynthetic process	60275
M3	0.0176068	17	1706	4	0.00234467	0.235294	GO:0060236	GO:BP	regulation of mitotic spindle organization	60275
M3	0.0176068	17	1706	4	0.00234467	0.235294	GO:0090224	GO:BP	regulation of spindle organization	60275
M3	0.0176068	372	1706	22	0.0128957	0.0591398	GO:0007017	GO:BP	microtubule-based process	60275
M3	0.0176068	18436	1706	580	0.339977	0.0314602	GO:0071704	GO:BP	organic substance metabolic process	60275
M3	0.018916	214	1706	15	0.0087925	0.0700935	GO:0006090	GO:BP	pyruvate metabolic process	60275
M3	0.0207698	1880	1706	76	0.0445487	0.0404255	GO:1901575	GO:BP	organic substance catabolic process	60275
M3	0.0215591	1589	1706	66	0.038687	0.0415356	GO:0019752	GO:BP	carboxylic acid metabolic process	60275
M3	0.0231497	5284	1706	185	0.108441	0.0350114	GO:0050789	GO:BP	regulation of biological process	60275
M3	0.0237211	31	1706	5	0.00293083	0.16129	GO:0006109	GO:BP	regulation of carbohydrate metabolic process	60275
M3	0.0237211	31	1706	5	0.00293083	0.16129	GO:0009846	GO:BP	pollen germination	60275
M3	0.0248789	19	1706	4	0.00234467	0.210526	GO:0070507	GO:BP	regulation of microtubule cytoskeleton organization	60275
M3	0.0254221	1604	1706	66	0.038687	0.0411471	GO:0043436	GO:BP	oxoacid metabolic process	60275
M3	0.0259231	10	1706	3	0.0017585	0.3	GO:0072351	GO:BP	tricarboxylic acid biosynthetic process	60275
M3	0.0259231	10	1706	3	0.0017585	0.3	GO:0030417	GO:BP	nicotianamine metabolic process	60275
M3	0.0259231	10	1706	3	0.0017585	0.3	GO:0030418	GO:BP	nicotianamine biosynthetic process	60275
M3	0.0259231	10	1706	3	0.0017585	0.3	GO:0015766	GO:BP	disaccharide transport	60275
M3	0.0259231	10	1706	3	0.0017585	0.3	GO:0015770	GO:BP	sucrose transport	60275
M3	0.0259231	10	1706	3	0.0017585	0.3	GO:0015772	GO:BP	oligosaccharide transport	60275
M3	0.0259231	47	1706	6	0.003517	0.12766	GO:0006270	GO:BP	DNA replication initiation	60275
M3	0.0259231	81	1706	8	0.00468933	0.0987654	GO:0010393	GO:BP	galacturonan metabolic process	60275
M3	0.0259231	81	1706	8	0.00468933	0.0987654	GO:0045488	GO:BP	pectin metabolic process	60275
M3	0.0259231	82	1706	8	0.00468933	0.097561	GO:0009832	GO:BP	plant-type cell wall biogenesis	60275
M3	0.0259231	118	1706	10	0.00586166	0.0847458	GO:0071669	GO:BP	plant-type cell wall organization or biogenesis	60275
M3	0.0259231	1610	1706	66	0.038687	0.0409938	GO:0006082	GO:BP	organic acid metabolic process	60275
M3	0.0278722	21	1706	4	0.00234467	0.190476	GO:0007052	GO:BP	mitotic spindle organization	60275
M3	0.0278722	21	1706	4	0.00234467	0.190476	GO:1902850	GO:BP	microtubule cytoskeleton organization involved in mitosis	60275
M3	0.0278722	21	1706	4	0.00234467	0.190476	GO:0043255	GO:BP	regulation of carbohydrate biosynthetic process	60275
M3	0.032725	22	1706	4	0.00234467	0.181818	GO:0140546	GO:BP	defense response to symbiont	60275
M3	0.032725	22	1706	4	0.00234467	0.181818	GO:0051607	GO:BP	defense response to virus	60275
M3	0.0342138	36	1706	5	0.00293083	0.138889	GO:0045490	GO:BP	pectin catabolic process	60275
M3	0.0406925	289	1706	17	0.00996483	0.0588235	GO:0005996	GO:BP	monosaccharide metabolic process	60275
M3	0.0421316	12	1706	3	0.0017585	0.25	GO:0009686	GO:BP	gibberellin biosynthetic process	60275
M3	0.0424289	1753	1706	69	0.0404455	0.0393611	GO:0006508	GO:BP	proteolysis	60275
M3	0.0435426	24	1706	4	0.00234467	0.166667	GO:0072350	GO:BP	tricarboxylic acid metabolic process	60275
M3	0.0440724	687	1706	32	0.0187573	0.0465793	GO:0016053	GO:BP	organic acid biosynthetic process	60275
M3	0.0440724	687	1706	32	0.0187573	0.0465793	GO:0046394	GO:BP	carboxylic acid biosynthetic process	60275
M3	0.0463996	25	1706	4	0.00234467	0.16	GO:0046578	GO:BP	regulation of Ras protein signal transduction	60275
M3	0.0463996	25	1706	4	0.00234467	0.16	GO:0051056	GO:BP	regulation of small GTPase mediated signal transduction	60275
M3	0.0463996	25	1706	4	0.00234467	0.16	GO:0007265	GO:BP	Ras protein signal transduction	60275
M3	0.0478245	1983	1706	76	0.0445487	0.0383258	GO:0009056	GO:BP	catabolic process	60275
M4	2.37314e-240	1497	1121	317	0.282783	0.211757	GO:0006412	GO:BP	translation	60275
M4	6.51463e-239	1515	1121	317	0.282783	0.209241	GO:0043043	GO:BP	peptide biosynthetic process	60275
M4	1.30241e-238	1574	1121	321	0.286351	0.203939	GO:0006518	GO:BP	peptide metabolic process	60275
M4	1.63006e-230	1609	1121	317	0.282783	0.197017	GO:0043604	GO:BP	amide biosynthetic process	60275
M4	1.0281e-222	1774	1121	322	0.287244	0.181511	GO:0043603	GO:BP	amide metabolic process	60275
M4	4.73874e-182	3035	1121	356	0.317574	0.117298	GO:1901566	GO:BP	organonitrogen compound biosynthetic process	60275
M4	1.82949e-125	5485	1121	390	0.347904	0.071103	GO:0044271	GO:BP	cellular nitrogen compound biosynthetic process	60275
M4	8.72098e-119	6663	1121	420	0.374665	0.0630347	GO:0044249	GO:BP	cellular biosynthetic process	60275
M4	4.23309e-112	5318	1121	366	0.326494	0.0688229	GO:0009059	GO:BP	macromolecule biosynthetic process	60275
M4	2.0581e-107	6397	1121	395	0.352364	0.0617477	GO:0010467	GO:BP	gene expression	60275
M4	2.50032e-105	7436	1121	424	0.378234	0.0570199	GO:1901576	GO:BP	organic substance biosynthetic process	60275
M4	8.66214e-104	7617	1121	427	0.38091	0.0560588	GO:0009058	GO:BP	biosynthetic process	60275
M4	5.30239e-92	8230	1121	426	0.380018	0.0517618	GO:0034641	GO:BP	cellular nitrogen compound metabolic process	60275
M4	6.39699e-70	9330	1121	417	0.371989	0.0446945	GO:1901564	GO:BP	organonitrogen compound metabolic process	60275
M4	6.70555e-69	7600	1121	368	0.328278	0.0484211	GO:0019538	GO:BP	protein metabolic process	60275
M4	3.56922e-56	153	1121	57	0.0508475	0.372549	GO:0002181	GO:BP	cytoplasmic translation	60275
M4	2.02547e-51	14344	1121	499	0.445138	0.0347881	GO:0044237	GO:BP	cellular metabolic process	60275
M4	3.05264e-50	584	1121	88	0.0785013	0.150685	GO:0022613	GO:BP	ribonucleoprotein complex biogenesis	60275
M4	7.94597e-46	14918	1121	498	0.444246	0.0333825	GO:0006807	GO:BP	nitrogen compound metabolic process	60275
M4	3.84241e-43	460	1121	73	0.0651204	0.158696	GO:0042254	GO:BP	ribosome biogenesis	60275
M4	5.83675e-38	13739	1121	451	0.402319	0.0328263	GO:0043170	GO:BP	macromolecule metabolic process	60275
M4	1.57612e-36	91	1121	36	0.0321142	0.395604	GO:0042274	GO:BP	ribosomal small subunit biogenesis	60275
M4	1.99359e-36	20715	1121	594	0.529884	0.0286749	GO:0009987	GO:BP	cellular process	60275
M4	2.99267e-36	18436	1121	547	0.487957	0.0296702	GO:0071704	GO:BP	organic substance metabolic process	60275
M4	6.01373e-35	19502	1121	565	0.504014	0.0289714	GO:0008152	GO:BP	metabolic process	60275
M4	7.84351e-33	17297	1121	513	0.457627	0.0296583	GO:0044238	GO:BP	primary metabolic process	60275
M4	1.67622e-26	199	1121	39	0.0347904	0.19598	GO:0022618	GO:BP	ribonucleoprotein complex assembly	60275
M4	5.0666e-26	205	1121	39	0.0347904	0.190244	GO:0071826	GO:BP	ribonucleoprotein complex subunit organization	60275
M4	5.0666e-26	1570	1121	102	0.0909902	0.0649682	GO:0044085	GO:BP	cellular component biogenesis	60275
M4	1.88499e-23	38	1121	20	0.0178412	0.526316	GO:0000028	GO:BP	ribosomal small subunit assembly	60275
M4	2.44015e-22	27848	1121	684	0.610169	0.0245619	GO:0008150	GO:BP	biological_process	60275
M4	2.44275e-21	78	1121	24	0.0214095	0.307692	GO:0042255	GO:BP	ribosome assembly	60275
M4	2.28544e-20	95	1121	25	0.0223015	0.263158	GO:0042273	GO:BP	ribosomal large subunit biogenesis	60275
M4	1.08118e-19	320	1121	40	0.0356824	0.125	GO:0016072	GO:BP	rRNA metabolic process	60275
M4	5.1999e-19	316	1121	39	0.0347904	0.123418	GO:0006364	GO:BP	rRNA processing	60275
M4	7.08008e-17	45	1121	17	0.015165	0.377778	GO:0030490	GO:BP	maturation of SSU-rRNA	60275
M4	1.16953e-15	131	1121	24	0.0214095	0.183206	GO:0140694	GO:BP	non-membrane-bounded organelle assembly	60275
M4	5.5363e-15	32	1121	14	0.0124888	0.4375	GO:0000462	GO:BP	maturation of SSU-rRNA from tricistronic rRNA transcript (SSU-rRNA, 5.8S rRNA, LSU-rRNA)	60275
M4	4.26944e-14	110	1121	21	0.0187333	0.190909	GO:0006414	GO:BP	translational elongation	60275
M4	4.25659e-13	169	1121	24	0.0214095	0.142012	GO:0070925	GO:BP	organelle assembly	60275
M4	1.07523e-12	3211	1121	123	0.109723	0.0383058	GO:0071840	GO:BP	cellular component organization or biogenesis	60275
M4	1.33078e-11	52	1121	14	0.0124888	0.269231	GO:0000470	GO:BP	maturation of LSU-rRNA	60275
M4	4.65713e-11	823	1121	49	0.043711	0.0595383	GO:0065003	GO:BP	protein-containing complex assembly	60275
M4	5.49788e-11	915	1121	52	0.0463872	0.0568306	GO:0043933	GO:BP	protein-containing complex organization	60275
M4	6.65386e-11	583	1121	40	0.0356824	0.0686106	GO:0034470	GO:BP	ncRNA processing	60275
M4	6.99423e-09	1080	1121	53	0.0472792	0.0490741	GO:0022607	GO:BP	cellular component assembly	60275
M4	5.36902e-07	27	1121	8	0.00713649	0.296296	GO:0002182	GO:BP	cytoplasmic translational elongation	60275
M4	5.38344e-07	796	1121	40	0.0356824	0.0502513	GO:0034660	GO:BP	ncRNA metabolic process	60275
M4	4.23678e-06	47	1121	9	0.00802855	0.191489	GO:0001732	GO:BP	formation of cytoplasmic translation initiation complex	60275
M4	3.62907e-05	60	1121	9	0.00802855	0.15	GO:0002183	GO:BP	cytoplasmic translational initiation	60275
M4	5.15738e-05	22	1121	6	0.00535236	0.272727	GO:0000463	GO:BP	maturation of LSU-rRNA from tricistronic rRNA transcript (SSU-rRNA, 5.8S rRNA, LSU-rRNA)	60275
M4	0.00013745	3	1121	3	0.00267618	1	GO:0060567	GO:BP	negative regulation of termination of DNA-templated transcription	60275
M4	0.000457523	147	1121	12	0.0107047	0.0816327	GO:0006413	GO:BP	translational initiation	60275
M4	0.00072991	11	1121	4	0.00356824	0.363636	GO:0009088	GO:BP	threonine biosynthetic process	60275
M4	0.00126364	5	1121	3	0.00267618	0.6	GO:0000461	GO:BP	endonucleolytic cleavage to generate mature 3'-end of SSU-rRNA from (SSU-rRNA, 5.8S rRNA, LSU-rRNA)	60275
M4	0.00156856	1428	1121	48	0.0428189	0.0336134	GO:0006996	GO:BP	organelle organization	60275
M4	0.00204854	26	1121	5	0.0044603	0.192308	GO:0001934	GO:BP	positive regulation of protein phosphorylation	60275
M4	0.00223991	6	1121	3	0.00267618	0.5	GO:0000447	GO:BP	endonucleolytic cleavage in ITS1 to separate SSU-rRNA from 5.8S rRNA and LSU-rRNA from tricistronic rRNA transcript (SSU-rRNA, 5.8S rRNA, LSU-rRNA)	60275
M4	0.00223991	6	1121	3	0.00267618	0.5	GO:0031554	GO:BP	regulation of termination of DNA-templated transcription	60275
M4	0.00223991	27	1121	5	0.0044603	0.185185	GO:0009631	GO:BP	cold acclimation	60275
M4	0.00223991	27	1121	5	0.0044603	0.185185	GO:0046451	GO:BP	diaminopimelate metabolic process	60275
M4	0.00223991	27	1121	5	0.0044603	0.185185	GO:0009089	GO:BP	lysine biosynthetic process via diaminopimelate	60275
M4	0.00223991	27	1121	5	0.0044603	0.185185	GO:0009085	GO:BP	lysine biosynthetic process	60275
M4	0.00240044	15	1121	4	0.00356824	0.266667	GO:0006566	GO:BP	threonine metabolic process	60275
M4	0.00268418	1350	1121	45	0.0401427	0.0333333	GO:0006396	GO:BP	RNA processing	60275
M4	0.00296012	29	1121	5	0.0044603	0.172414	GO:0042327	GO:BP	positive regulation of phosphorylation	60275
M4	0.00296012	29	1121	5	0.0044603	0.172414	GO:0010562	GO:BP	positive regulation of phosphorus metabolic process	60275
M4	0.00296012	29	1121	5	0.0044603	0.172414	GO:0045937	GO:BP	positive regulation of phosphate metabolic process	60275
M4	0.00338643	186	1121	12	0.0107047	0.0645161	GO:0009409	GO:BP	response to cold	60275
M4	0.00339799	30	1121	5	0.0044603	0.166667	GO:0006553	GO:BP	lysine metabolic process	60275
M4	0.00350064	336	1121	17	0.015165	0.0505952	GO:0009266	GO:BP	response to temperature stimulus	60275
M4	0.00376104	189	1121	12	0.0107047	0.0634921	GO:0007005	GO:BP	mitochondrion organization	60275
M4	0.00444383	1636	1121	51	0.0454951	0.0311736	GO:0042221	GO:BP	response to chemical	60275
M4	0.00445157	18	1121	4	0.00356824	0.222222	GO:0043628	GO:BP	regulatory ncRNA 3'-end processing	60275
M4	0.00475288	8	1121	3	0.00267618	0.375	GO:0034551	GO:BP	mitochondrial respiratory chain complex III assembly	60275
M4	0.00475288	8	1121	3	0.00267618	0.375	GO:0000479	GO:BP	endonucleolytic cleavage of tricistronic rRNA transcript (SSU-rRNA, 5.8S rRNA, LSU-rRNA)	60275
M4	0.00475288	8	1121	3	0.00267618	0.375	GO:0000478	GO:BP	endonucleolytic cleavage involved in rRNA processing	60275
M4	0.00475288	8	1121	3	0.00267618	0.375	GO:0017062	GO:BP	respiratory chain complex III assembly	60275
M4	0.00475288	33	1121	5	0.0044603	0.151515	GO:0009561	GO:BP	megagametogenesis	60275
M4	0.00484076	226	1121	13	0.0115968	0.0575221	GO:0045454	GO:BP	cell redox homeostasis	60275
M4	0.00497689	319	1121	16	0.014273	0.0501567	GO:0051172	GO:BP	negative regulation of nitrogen compound metabolic process	60275
M4	0.00503048	94	1121	8	0.00713649	0.0851064	GO:0009067	GO:BP	aspartate family amino acid biosynthetic process	60275
M4	0.00555146	73	1121	7	0.00624442	0.0958904	GO:0006081	GO:BP	cellular aldehyde metabolic process	60275
M4	0.00620323	9	1121	3	0.00267618	0.333333	GO:0110096	GO:BP	cellular response to aldehyde	60275
M4	0.00620323	9	1121	3	0.00267618	0.333333	GO:0046294	GO:BP	formaldehyde catabolic process	60275
M4	0.00620323	9	1121	3	0.00267618	0.333333	GO:0046292	GO:BP	formaldehyde metabolic process	60275
M4	0.00620323	9	1121	3	0.00267618	0.333333	GO:0110095	GO:BP	cellular detoxification of aldehyde	60275
M4	0.00784769	78	1121	7	0.00624442	0.0897436	GO:0000413	GO:BP	protein peptidyl-prolyl isomerization	60275
M4	0.0081428	38	1121	5	0.0044603	0.131579	GO:0006595	GO:BP	polyamine metabolic process	60275
M4	0.0102402	40	1121	5	0.0044603	0.125	GO:0046470	GO:BP	phosphatidylcholine metabolic process	60275
M4	0.0107765	107	1121	8	0.00713649	0.0747664	GO:0009066	GO:BP	aspartate family amino acid metabolic process	60275
M4	0.0113461	85	1121	7	0.00624442	0.0823529	GO:0006626	GO:BP	protein targeting to mitochondrion	60275
M4	0.0113461	85	1121	7	0.00624442	0.0823529	GO:0070585	GO:BP	protein localization to mitochondrion	60275
M4	0.0113461	85	1121	7	0.00624442	0.0823529	GO:0018208	GO:BP	peptidyl-proline modification	60275
M4	0.0113461	85	1121	7	0.00624442	0.0823529	GO:0072655	GO:BP	establishment of protein localization to mitochondrion	60275
M4	0.0113461	135	1121	9	0.00802855	0.0666667	GO:0045934	GO:BP	negative regulation of nucleobase-containing compound metabolic process	60275
M4	0.0133779	358	1121	16	0.014273	0.0446927	GO:0006790	GO:BP	sulfur compound metabolic process	60275
M4	0.0150924	66	1121	6	0.00535236	0.0909091	GO:0001932	GO:BP	regulation of protein phosphorylation	60275
M4	0.0151452	45	1121	5	0.0044603	0.111111	GO:0033108	GO:BP	mitochondrial respiratory chain complex assembly	60275
M4	0.0167243	1260	1121	39	0.0347904	0.0309524	GO:0010033	GO:BP	response to organic substance	60275
M4	0.0174467	28	1121	4	0.00356824	0.142857	GO:0000027	GO:BP	ribosomal large subunit assembly	60275
M4	0.0178803	47	1121	5	0.0044603	0.106383	GO:0009086	GO:BP	methionine biosynthetic process	60275
M4	0.0178803	69	1121	6	0.00535236	0.0869565	GO:0042325	GO:BP	regulation of phosphorylation	60275
M4	0.0178803	206	1121	11	0.00981267	0.0533981	GO:0044272	GO:BP	sulfur compound biosynthetic process	60275
M4	0.0178803	270	1121	13	0.0115968	0.0481481	GO:0031324	GO:BP	negative regulation of cellular metabolic process	60275
M4	0.0178803	2805	1121	74	0.0660125	0.0263815	GO:0016043	GO:BP	cellular component organization	60275
M4	0.0186178	14	1121	3	0.00267618	0.214286	GO:0046039	GO:BP	GTP metabolic process	60275
M4	0.0186178	14	1121	3	0.00267618	0.214286	GO:0046051	GO:BP	UTP metabolic process	60275
M4	0.0186178	14	1121	3	0.00267618	0.214286	GO:0006228	GO:BP	UTP biosynthetic process	60275
M4	0.0186178	14	1121	3	0.00267618	0.214286	GO:0006183	GO:BP	GTP biosynthetic process	60275
M4	0.0186178	48	1121	5	0.0044603	0.104167	GO:0051205	GO:BP	protein insertion into membrane	60275
M4	0.0186178	95	1121	7	0.00624442	0.0736842	GO:0045892	GO:BP	negative regulation of DNA-templated transcription	60275
M4	0.0186178	375	1121	16	0.014273	0.0426667	GO:0006457	GO:BP	protein folding	60275
M4	0.0190465	122	1121	8	0.00713649	0.0655738	GO:0072528	GO:BP	pyrimidine-containing compound biosynthetic process	60275
M4	0.0192719	180	1121	10	0.00892061	0.0555556	GO:0010558	GO:BP	negative regulation of macromolecule biosynthetic process	60275
M4	0.0201348	97	1121	7	0.00624442	0.0721649	GO:1902679	GO:BP	negative regulation of RNA biosynthetic process	60275
M4	0.0201348	97	1121	7	0.00624442	0.0721649	GO:0009873	GO:BP	ethylene-activated signaling pathway	60275
M4	0.0201348	97	1121	7	0.00624442	0.0721649	GO:1903507	GO:BP	negative regulation of nucleic acid-templated transcription	60275
M4	0.0213274	15	1121	3	0.00267618	0.2	GO:0009228	GO:BP	thiamine biosynthetic process	60275
M4	0.0213274	15	1121	3	0.00267618	0.2	GO:0034309	GO:BP	primary alcohol biosynthetic process	60275
M4	0.0213274	15	1121	3	0.00267618	0.2	GO:0032147	GO:BP	activation of protein kinase activity	60275
M4	0.0214863	419	1121	17	0.015165	0.0405728	GO:0051246	GO:BP	regulation of protein metabolic process	60275
M4	0.0215659	800	1121	27	0.0240856	0.03375	GO:0070887	GO:BP	cellular response to chemical stimulus	60275
M4	0.022835	100	1121	7	0.00624442	0.07	GO:0071369	GO:BP	cellular response to ethylene stimulus	60275
M4	0.0249221	16	1121	3	0.00267618	0.1875	GO:0009559	GO:BP	embryo sac central cell differentiation	60275
M4	0.0249221	16	1121	3	0.00267618	0.1875	GO:0031125	GO:BP	rRNA 3'-end processing	60275
M4	0.0249602	53	1121	5	0.0044603	0.0943396	GO:0006555	GO:BP	methionine metabolic process	60275
M4	0.0259668	33	1121	4	0.00356824	0.121212	GO:0045039	GO:BP	protein insertion into mitochondrial inner membrane	60275
M4	0.0259668	103	1121	7	0.00624442	0.0679612	GO:0006839	GO:BP	mitochondrial transport	60275
M4	0.0261187	54	1121	5	0.0044603	0.0925926	GO:0031401	GO:BP	positive regulation of protein modification process	60275
M4	0.0262718	132	1121	8	0.00713649	0.0606061	GO:0072527	GO:BP	pyrimidine-containing compound metabolic process	60275
M4	0.0262718	192	1121	10	0.00892061	0.0520833	GO:0031327	GO:BP	negative regulation of cellular biosynthetic process	60275
M4	0.0272009	34	1121	4	0.00356824	0.117647	GO:0007007	GO:BP	inner mitochondrial membrane organization	60275
M4	0.029576	365	1121	15	0.0133809	0.0410959	GO:0019725	GO:BP	cellular homeostasis	60275
M4	0.0317682	18	1121	3	0.00267618	0.166667	GO:0046185	GO:BP	aldehyde catabolic process	60275
M4	0.0317682	18	1121	3	0.00267618	0.166667	GO:0043242	GO:BP	negative regulation of protein-containing complex disassembly	60275
M4	0.0317682	198	1121	10	0.00892061	0.0505051	GO:0009890	GO:BP	negative regulation of biosynthetic process	60275
M4	0.032434	36	1121	4	0.00356824	0.111111	GO:0006596	GO:BP	polyamine biosynthetic process	60275
M4	0.0351347	37	1121	4	0.00356824	0.108108	GO:0000387	GO:BP	spliceosomal snRNP assembly	60275
M4	0.0351347	37	1121	4	0.00356824	0.108108	GO:0090151	GO:BP	establishment of protein localization to mitochondrial membrane	60275
M4	0.0351347	37	1121	4	0.00356824	0.108108	GO:0051204	GO:BP	protein insertion into mitochondrial membrane	60275
M4	0.0361583	112	1121	7	0.00624442	0.0625	GO:0051253	GO:BP	negative regulation of RNA metabolic process	60275
M4	0.0361583	141	1121	8	0.00713649	0.0567376	GO:0009723	GO:BP	response to ethylene	60275
M4	0.0367307	60	1121	5	0.0044603	0.0833333	GO:0009553	GO:BP	embryo sac development	60275
M4	0.0374738	38	1121	4	0.00356824	0.105263	GO:0007006	GO:BP	mitochondrial membrane organization	60275
M4	0.0399558	20	1121	3	0.00267618	0.15	GO:1900247	GO:BP	regulation of cytoplasmic translational elongation	60275
M4	0.0399558	20	1121	3	0.00267618	0.15	GO:0017182	GO:BP	peptidyl-diphthamide metabolic process	60275
M4	0.0399558	20	1121	3	0.00267618	0.15	GO:0017183	GO:BP	peptidyl-diphthamide biosynthetic process from peptidyl-histidine	60275
M4	0.0440614	21	1121	3	0.00267618	0.142857	GO:0051189	GO:BP	prosthetic group metabolic process	60275
M4	0.0440614	21	1121	3	0.00267618	0.142857	GO:0043545	GO:BP	molybdopterin cofactor metabolic process	60275
M4	0.0440614	21	1121	3	0.00267618	0.142857	GO:0018202	GO:BP	peptidyl-histidine modification	60275
M4	0.0440614	21	1121	3	0.00267618	0.142857	GO:0019720	GO:BP	Mo-molybdopterin cofactor metabolic process	60275
M4	0.0440614	21	1121	3	0.00267618	0.142857	GO:0006777	GO:BP	Mo-molybdopterin cofactor biosynthetic process	60275
M4	0.0440614	21	1121	3	0.00267618	0.142857	GO:0032324	GO:BP	molybdopterin cofactor biosynthetic process	60275
M4	0.0440614	578	1121	20	0.0178412	0.0346021	GO:0009755	GO:BP	hormone-mediated signaling pathway	60275
M4	0.0446422	90	1121	6	0.00535236	0.0666667	GO:0000097	GO:BP	sulfur amino acid biosynthetic process	60275
M4	0.0491506	22	1121	3	0.00267618	0.136364	GO:0006772	GO:BP	thiamine metabolic process	60275
M4	0.0491506	22	1121	3	0.00267618	0.136364	GO:0042724	GO:BP	thiamine-containing compound biosynthetic process	60275
M4	0.0491506	22	1121	3	0.00267618	0.136364	GO:0042723	GO:BP	thiamine-containing compound metabolic process	60275
M4	0.0495279	66	1121	5	0.0044603	0.0757576	GO:0009309	GO:BP	amine biosynthetic process	60275
M4	0.0495279	66	1121	5	0.0044603	0.0757576	GO:0042401	GO:BP	biogenic amine biosynthetic process	60275
M5	2.44912e-14	495	786	37	0.0470738	0.0747475	GO:0006366	GO:BP	transcription by RNA polymerase II	60275
M5	4.33219e-10	370	786	27	0.0343511	0.072973	GO:0006357	GO:BP	regulation of transcription by RNA polymerase II	60275
M5	4.39267e-09	6397	786	146	0.185751	0.0228232	GO:0010467	GO:BP	gene expression	60275
M5	5.65257e-09	3264	786	90	0.114504	0.0275735	GO:0010468	GO:BP	regulation of gene expression	60275
M5	3.07729e-08	226	786	19	0.024173	0.0840708	GO:0046488	GO:BP	phosphatidylinositol metabolic process	60275
M5	3.07729e-08	3608	786	94	0.119593	0.0260532	GO:0034654	GO:BP	nucleobase-containing compound biosynthetic process	60275
M5	4.52003e-08	3768	786	96	0.122137	0.0254777	GO:0019222	GO:BP	regulation of metabolic process	60275
M5	5.36446e-08	3624	786	93	0.118321	0.0256623	GO:0060255	GO:BP	regulation of macromolecule metabolic process	60275
M5	5.83659e-08	16	786	7	0.00890585	0.4375	GO:0035510	GO:BP	DNA dealkylation	60275
M5	5.83659e-08	16	786	7	0.00890585	0.4375	GO:0080111	GO:BP	DNA demethylation	60275
M5	6.61862e-08	37	786	9	0.0114504	0.243243	GO:0006074	GO:BP	(1->3)-beta-D-glucan metabolic process	60275
M5	6.61862e-08	37	786	9	0.0114504	0.243243	GO:0006075	GO:BP	(1->3)-beta-D-glucan biosynthetic process	60275
M5	6.61862e-08	6615	786	143	0.181934	0.0216175	GO:0006139	GO:BP	nucleobase-containing compound metabolic process	60275
M5	6.61862e-08	8230	786	169	0.215013	0.0205346	GO:0034641	GO:BP	cellular nitrogen compound metabolic process	60275
M5	8.17684e-08	312	786	21	0.0267176	0.0673077	GO:0006650	GO:BP	glycerophospholipid metabolic process	60275
M5	8.17684e-08	5559	786	125	0.159033	0.0224861	GO:0065007	GO:BP	biological regulation	60275
M5	1.14722e-07	90	786	12	0.0152672	0.133333	GO:0015986	GO:BP	proton motive force-driven ATP synthesis	60275
M5	1.14722e-07	90	786	12	0.0152672	0.133333	GO:0006754	GO:BP	ATP biosynthetic process	60275
M5	1.14722e-07	5485	786	123	0.156489	0.0224248	GO:0044271	GO:BP	cellular nitrogen compound biosynthetic process	60275
M5	1.21486e-07	5318	786	120	0.152672	0.0225649	GO:0009059	GO:BP	macromolecule biosynthetic process	60275
M5	1.46293e-07	428	786	24	0.0305344	0.0560748	GO:0006644	GO:BP	phospholipid metabolic process	60275
M5	1.46293e-07	5284	786	119	0.151399	0.0225208	GO:0050789	GO:BP	regulation of biological process	60275
M5	1.71023e-07	44	786	9	0.0114504	0.204545	GO:0006475	GO:BP	internal protein amino acid acetylation	60275
M5	1.71023e-07	44	786	9	0.0114504	0.204545	GO:0016573	GO:BP	histone acetylation	60275
M5	1.71023e-07	44	786	9	0.0114504	0.204545	GO:0018394	GO:BP	peptidyl-lysine acetylation	60275
M5	1.71023e-07	44	786	9	0.0114504	0.204545	GO:0018393	GO:BP	internal peptidyl-lysine acetylation	60275
M5	1.95635e-07	3146	786	81	0.103053	0.025747	GO:0097659	GO:BP	nucleic acid-templated transcription	60275
M5	1.95635e-07	3144	786	81	0.103053	0.0257634	GO:0006351	GO:BP	DNA-templated transcription	60275
M5	2.08224e-07	3153	786	81	0.103053	0.0256898	GO:0032774	GO:BP	RNA biosynthetic process	60275
M5	2.11477e-07	20715	786	347	0.441476	0.0167511	GO:0009987	GO:BP	cellular process	60275
M5	2.6597e-07	225	786	17	0.0216285	0.0755556	GO:0016570	GO:BP	histone modification	60275
M5	2.87217e-07	64	786	10	0.0127226	0.15625	GO:0007062	GO:BP	sister chromatid cohesion	60275
M5	2.87217e-07	102	786	12	0.0152672	0.117647	GO:0046034	GO:BP	ATP metabolic process	60275
M5	2.87217e-07	5934	786	128	0.16285	0.0215706	GO:0090304	GO:BP	nucleic acid metabolic process	60275
M5	2.88404e-07	1428	786	47	0.0597964	0.0329132	GO:0006996	GO:BP	organelle organization	60275
M5	3.06607e-07	65	786	10	0.0127226	0.153846	GO:0006354	GO:BP	DNA-templated transcription elongation	60275
M5	3.06607e-07	104	786	12	0.0152672	0.115385	GO:0009145	GO:BP	purine nucleoside triphosphate biosynthetic process	60275
M5	3.06607e-07	104	786	12	0.0152672	0.115385	GO:0009206	GO:BP	purine ribonucleoside triphosphate biosynthetic process	60275
M5	3.41048e-07	357	786	21	0.0267176	0.0588235	GO:0046486	GO:BP	glycerolipid metabolic process	60275
M5	4.30309e-07	3967	786	94	0.119593	0.0236955	GO:0019438	GO:BP	aromatic compound biosynthetic process	60275
M5	4.53078e-07	1085	786	39	0.0496183	0.0359447	GO:0019637	GO:BP	organophosphate metabolic process	60275
M5	4.84381e-07	5040	786	112	0.142494	0.0222222	GO:0016070	GO:BP	RNA metabolic process	60275
M5	4.8946e-07	3984	786	94	0.119593	0.0235944	GO:0018130	GO:BP	heterocycle biosynthetic process	60275
M5	5.03263e-07	25	786	7	0.00890585	0.28	GO:0007064	GO:BP	mitotic sister chromatid cohesion	60275
M5	6.2937e-07	2880	786	74	0.0941476	0.0256944	GO:0010556	GO:BP	regulation of macromolecule biosynthetic process	60275
M5	8.74177e-07	116	786	12	0.0152672	0.103448	GO:0009205	GO:BP	purine ribonucleoside triphosphate metabolic process	60275
M5	9.42128e-07	117	786	12	0.0152672	0.102564	GO:0009144	GO:BP	purine nucleoside triphosphate metabolic process	60275
M5	1.19813e-06	2932	786	74	0.0941476	0.0252387	GO:0009889	GO:BP	regulation of biosynthetic process	60275
M5	1.22641e-06	390	786	21	0.0267176	0.0538462	GO:0010629	GO:BP	negative regulation of gene expression	60275
M5	1.29985e-06	7076	786	143	0.181934	0.0202092	GO:0046483	GO:BP	heterocycle metabolic process	60275
M5	1.34726e-06	29	786	7	0.00890585	0.241379	GO:0032784	GO:BP	regulation of DNA-templated transcription elongation	60275
M5	1.48068e-06	60	786	9	0.0114504	0.15	GO:0006473	GO:BP	protein acetylation	60275
M5	1.71631e-06	2911	786	73	0.0928753	0.0250773	GO:0031326	GO:BP	regulation of cellular biosynthetic process	60275
M5	1.71999e-06	205	786	15	0.019084	0.0731707	GO:0051169	GO:BP	nuclear transport	60275
M5	1.81195e-06	14344	786	251	0.319338	0.0174986	GO:0044237	GO:BP	cellular metabolic process	60275
M5	1.89609e-06	4543	786	101	0.128499	0.022232	GO:0050794	GO:BP	regulation of cellular process	60275
M5	1.89609e-06	7135	786	143	0.181934	0.020042	GO:0006725	GO:BP	cellular aromatic compound metabolic process	60275
M5	1.90262e-06	127	786	12	0.0152672	0.0944882	GO:0009201	GO:BP	ribonucleoside triphosphate biosynthetic process	60275
M5	1.96747e-06	180	786	14	0.0178117	0.0777778	GO:1902600	GO:BP	proton transmembrane transport	60275
M5	2.00557e-06	128	786	12	0.0152672	0.09375	GO:0009142	GO:BP	nucleoside triphosphate biosynthetic process	60275
M5	2.29176e-06	4152	786	94	0.119593	0.0226397	GO:1901362	GO:BP	organic cyclic compound biosynthetic process	60275
M5	2.31006e-06	32	786	7	0.00890585	0.21875	GO:0070988	GO:BP	demethylation	60275
M5	2.49379e-06	65	786	9	0.0114504	0.138462	GO:0006304	GO:BP	DNA modification	60275
M5	3.0998e-06	188	786	14	0.0178117	0.0744681	GO:0018205	GO:BP	peptidyl-lysine modification	60275
M5	3.96569e-06	7436	786	146	0.185751	0.0196342	GO:1901576	GO:BP	organic substance biosynthetic process	60275
M5	4.02885e-06	69	786	9	0.0114504	0.130435	GO:0043543	GO:BP	protein acylation	60275
M5	4.42839e-06	139	786	12	0.0152672	0.0863309	GO:0009199	GO:BP	ribonucleoside triphosphate metabolic process	60275
M5	5.05591e-06	3243	786	77	0.0979644	0.0237434	GO:0031323	GO:BP	regulation of cellular metabolic process	60275
[truncated: 287 more rows]
