# Supplementary material for: Integrated Transcriptome Analysis Identified Key Expansin Genes Associated with Wheat Cell Wall, GrainWeight and Yield
Source: Preprints.org preprint supplement (doi:10.20944/preprints202307.0816.v1), 2023-07-12
Supplement: Supplementary file 2 [file Supplementary TableS1.xlsx]

## Sheet: Sheet1
Sample	n_processed	n_pseudoaligned	%_pseudoaligned
SRR7175014_WT_25DPA_2	19219507	11941109	62.1
SRR7175015_WT_25DPA_1	15966612	9893213	62
SRR7175016_WT-20DPA_2	20138528	11520548	57.2
SRR7175017_WT-20DPA_1	16627923	9885135	59.4
SRR7175018_WT_15DPA_2	277173	167899	60.6
SRR7175019_WT_15DPA_1	20907452	12407223	59.3
SRR7175020_WT_9DPA_2	3563846	2512178	70.5
SRR7175021_WT_9DPA_1	15955810	11144945	69.8
SRR8658941_GR_20_2	48100281	32512690	67.6
SRR8658942_GR_20_1	37837471	25854643	68.3
SRR8658943_GR_10_2	37531457	29066265	77.4
SRR8658944_GR_10_1	34311196	26594704	77.5
SRR8658945_GR_15_2	32626349	25072850	76.8
SRR8658946_GR_15_1	36362339	27510235	75.7
SRR8658949_GR_5_2	38534716	30437504	79
SRR8658950_GR_5_1	38322704	28911711	75.4
_NIL_0362_+QTL_A_15DPA_1_SRR1926214	12557503	7087713	56.4
_NIL_0362_+QTL_A_15DPA_2_SRR1958698	25439773	14448985	56.8
_NIL_0362_+QTL_A_25DPA_1_SRR1954915	12361636	6767809	54.7
_NIL_0362_+QTL_A_25DPA_2_SRR1954916	24915285	13708458	55
_NIL_0362_+QTL_A_35DPA_1_SRR1955045	20820419	12761817	61.3
_NIL_0362_+QTL_A_35DPA_2_SRR1958718	42188792	25975655	61.6
_NIL_0362_-QTL_B_15DPA_1_SRR1958760	12156755	6926344	57
_NIL_0362_-QTL_B_15DPA_2_SRR1958761	24401900	13962799	57.2
_NIL_0362_-QTL_B_25DPA_1_SRR1958762	276775	152874	55.2
_NIL_0362_-QTL_B_25DPA_2_SRR1958763	27739404	15299211	55.2
_NIL_0362_-QTL_B_35DPA_1_SRR1958790	20729417	12585172	60.7
_NIL_0362_-QTL_B_35DPA_2_SRR1958791	42166542	25715036	61
_NIL_0807_+QTL_A_15DPA_1_SRR1955046	11004168	6381965	58
_NIL_0807_+QTL_A_15DPA_2_SRR1955047	22216587	12952158	58.3
_NIL_0807_+QTL_A_25DPA_1_SRR1955050	15587571	9565287	61.4
_NIL_0807_+QTL_A_25DPA_2_SRR1955052	25616954	15772208	61.6
_NIL_0807_+QTL_A_35DPA_1_SRR1955048	20163613	11259769	55.8
_NIL_0807_+QTL_A_35DPA_2_SRR1955049	40795550	22900484	56.1
_NIL_0807_-QTL_B_15DPA_1_SRR1958730	13629172	7319701	53.7
_NIL_0807_-QTL_B_15DPA_2_SRR1958731	6518434	3532069	54.2
_NIL_0807_-QTL_B_25DPA_1_SRR1958732	12240454	7282831	59.5
_NIL_0807_-QTL_B_25DPA_2_SRR1958733	25086653	15015643	59.9
_NIL_0807_-QTL_B_35DPA_1_SRR1958735	15666698	9587391	61.2
_NIL_0807_-QTL_B_35DPA_2_SRR1958736	31644314	19450024	61.5
_NIL_1038_+QTL_A_15DPA_1_SRR1958729	11922369	6244631	52.4
_NIL_1038_+QTL_A_15DPA_2_SRR1958751	24030487	12677167	52.8
_NIL_1038_+QTL_A_25DPA_1_SRR1958753	15007748	8558640	57
_NIL_1038_+QTL_A_25DPA_2_SRR1958754	29722837	17044470	57.3
_NIL_1038_+QTL_A_35DPA_1_SRR1958755	14927574	8524318	57.1
_NIL_1038_+QTL_A_35DPA_2_SRR1958756	30508571	17503340	57.4
_NIL_1038_-QTL_B_15DPA_1_SRR1958738	276227	153508	55.6
_NIL_1038_-QTL_B_15DPA_2_SRR1958739	21450616	11948499	55.7
_NIL_1038_-QTL_B_25DPA_1_SRR1958740	10344862	6090540	58.9
_NIL_1038_-QTL_B_25DPA_2_SRR1958741	21075264	12490344	59.3
_NIL_1038_-QTL_B_35DPA_1_SRR1958743	551260	309997	56.2
_NIL_1038_-QTL_B_35DPA_2_SRR1958744	32984346	18543056	56.2
_NIL_1275_+QTL_A_15DPA_1_SRR1955053	12454104	6810538	54.7
_NIL_1275_+QTL_A_15DPA_2_SRR1955054	3082144	1702382	55.2
_NIL_1275_+QTL_A_25DPA_1_SRR1955055	14203511	7684756	54.1
_NIL_1275_+QTL_A_25DPA_2_SRR1955056	28700953	15640120	54.5
_NIL_1275_+QTL_A_35DPA_1_SRR1955057	18436918	10363517	56.2
_NIL_1275_+QTL_A_35DPA_2_SRR1955058	37307639	21078497	56.5
_NIL_1275_-QTL_B_15DPA_1_SRR1958745	13241609	7488851	56.6
_NIL_1275_-QTL_B_15DPA_2_SRR1958746	26765932	15232344	56.9
_NIL_1275_-QTL_B_25DPA_1_SRR1958747	13541869	7424976	54.8
_NIL_1275_-QTL_B_25DPA_2_SRR1958748	27142819	14974867	55.2
_NIL_1275_-QTL_B_35DPA_1_SRR1958749	18553544	10723785	57.8
_NIL_1275_-QTL_B_35DPA_2_SRR1958750	37788435	21963112	58.1
_NIL_1516_+QTL_A_15DPA_1_SRR1955059	12206947	6824126	55.9
_NIL_1516_+QTL_A_15DPA_2_SRR1958727	24745490	13928587	56.3
_NIL_1516_+QTL_A_25DPA_1_SRR1955060	19298095	10820789	56.1
_NIL_1516_+QTL_A_25DPA_2_SRR1955061	2443672	1382229	56.6
_NIL_1516_+QTL_A_35DPA_1_SRR1955162	16536045	9454885	57.2
_NIL_1516_+QTL_A_35DPA_2_SRR1955163	33371760	19176939	57.5
_NIL_1516_-QTL_B_15DPA_1_SRR1958764	2859734	1704317	59.6
_NIL_1516_-QTL_B_15DPA_2_SRR1958765	30319541	18061831	59.6
_NIL_1516_-QTL_B_25DPA_1_SRR1958766	19068399	10338633	54.2
_NIL_1516_-QTL_B_25DPA_2_SRR1958767	38829304	21174874	54.5
_NIL_1516_-QTL_B_35DPA_1_SRR1958768	17529791	10152068	57.9
_NIL_1516_-QTL_B_35DPA_2_SRR1958769	35665548	20764794	58.2
_Par_Baxt_-QTL_B_15DPA_1_SRR1958770	11404019	6272534	55
_Par_Baxt_-QTL_B_15DPA_2_SRR1958771	9443148	5204420	55.1
_Par_Baxt_-QTL_B_25DPA_1_SRR1958773	10574029	5742149	54.3
_Par_Baxt_-QTL_B_25DPA_2_SRR1958774	21227152	11606098	54.7
_Par_Baxt_-QTL_B_35DPA_1_SRR1958775	16255276	9587841	59
_Par_Baxt_-QTL_B_35DPA_2_SRR1958776	32950754	19537309	59.3
_Par_Chara_-QTL_B_15DPA_1_SRR1958777	13460002	7493147	55.7
_Par_Chara_-QTL_B_15DPA_2_SRR1958778	27389672	15334401	56
_Par_Chara_-QTL_B_25DPA_1_SRR1958779	13793222	8012481	58.1
_Par_Chara_-QTL_B_25DPA_2_SRR1958780	8402027	4906820	58.4
_Par_Chara_-QTL_B_35DPA_1_SRR1958781	19278210	12126460	62.9
_Par_Chara_-QTL_B_35DPA_2_SRR1958782	38952582	24609892	63.2
_Par_West_-QTL_B_15DPA_1_SRR1958783	11773274	6374919	54.1
_Par_West_-QTL_B_15DPA_2_SRR1958784	24563931	13415038	54.6
_Par_West_-QTL_B_25DPA_1_SRR1958785	13550955	7741011	57.1
_Par_West_-QTL_B_25DPA_2_SRR1958786	28173959	16229192	57.6
_Par_West_-QTL_B_35DPA_1_SRR1958787	11392173	6413566	56.3
_Par_West_-QTL_B_35DPA_2_SRR1958788	48980122	27489615	56.1
_Par_Yitpi_+QTL_A_15DPA_1_SRR1958792	6430751	3683680	57.3
_Par_Yitpi_+QTL_A_15DPA_2_SRR1958728	27537141	15766397	57.3
_Par_Yitpi_+QTL_A_25DPA_1_SRR1955165	8715917	4926206	56.5
_Par_Yitpi_+QTL_A_25DPA_2_SRR1955166	37290031	21017559	56.4
_Par_Yitpi_+QTL_A_35DPA_1_SRR1958758	7463262	4312209	57.8
_Par_Yitpi_+QTL_A_35DPA_2_SRR1958759	33128216	19092967	57.6
