# Supplementary material for: Integrated Transcriptome Analysis Identified Key Expansin Genes Associated with Wheat Cell Wall, GrainWeight and Yield
Source: Preprints.org preprint supplement (doi:10.20944/preprints202307.0816.v1), 2023-07-12
Supplement: Supplementary file 6 [file Supplementary TableS4.xlsx]

## Sheet: Austral, Valdivia
UTC-4 Time	Air Temperature ºC	Cumulative Precipitation mm	Solar Radiation Mj/m²
15-10-2021	8.4	0.5	17.3
16-10-2021	9.6	2.3	13.7
17-10-2021	10.8	0	18.6
18-10-2021	12.2	0.1	25.4
19-10-2021	18.7	0	25.5
20-10-2021	13.1	0	13.5
21-10-2021	10.8	0.4	18.8
22-10-2021	11.2	0	16.8
23-10-2021	11	0.5	13.4
24-10-2021	11.7	2.3	10.1
25-10-2021	13.1	0.9	15.9
26-10-2021	12.2	0.1	23.3
27-10-2021	13	0.2	23.3
28-10-2021	13.7	0	21.3
29-10-2021	13	0	22.7
30-10-2021	14.4	0	26.9
31-10-2021	15.6	0	26.4
01-11-2021	12.6	0	25.3
02-11-2021	15	0	19.2
03-11-2021	10.7	17.1	15.9
04-11-2021	10	0.3	19.5
05-11-2021	12.5	0	27.3
06-11-2021	13.1	0	27.5
07-11-2021	13.9	0	20.4
08-11-2021	16.4	0	25.4
09-11-2021	13.2	0	27
10-11-2021	14.2	0	21.3
11-11-2021	15	0	19.9
12-11-2021	13.2	3.2	8.2
13-11-2021	11.8	2.8	16.5
14-11-2021	11	9.2	10.6
15-11-2021	10.2	9.2	25
16-11-2021	12.4	0	29.9
17-11-2021	12.8	0	24.5
18-11-2021	15.2	0	22.1
19-11-2021	18.4	0	28.8
20-11-2021	15.8	0	29.8
21-11-2021	14	0	29
22-11-2021	15.3	0	26.2
23-11-2021	18.8	0	29.4
24-11-2021	15.4	0	17.9
25-11-2021	14.8	0	13.4
26-11-2021	14.4	0	23.8
27-11-2021	12.4	0	26.4
28-11-2021	10.8	0	30
29-11-2021	13	0	26.2
30-11-2021	14.1	0	29.2
01-12-2021	11.4	0	11.3
02-12-2021	14.4	0	32
03-12-2021	16.4	0	30.1
04-12-2021	17.8	0	30.5
05-12-2021	20.5	0	30.7
06-12-2021	22.1	0	30.5
07-12-2021	13.6	5.4	4.8
08-12-2021	19	0	26.6
09-12-2021	23	0	30
10-12-2021	19.2	0	30.8
11-12-2021	12.8	11	15.6
12-12-2021	10.8	1.5	23.3
13-12-2021	13.3	0	22.6
14-12-2021	12.8	0	28.8
15-12-2021	17.6	0	31
16-12-2021	19.8	0	31.5
17-12-2021	14.7	0	19.5
18-12-2021	14.9	0	30.4
19-12-2021	17.6	0	27.7
20-12-2021	17.6	0	31.3
21-12-2021	19	0	31.3
22-12-2021	23	0	31.1
23-12-2021	13.9	0	19.5
24-12-2021	16	0	30.9
25-12-2021	21.4	0	30.4
26-12-2021	22	0	30.9
27-12-2021	19.6	0	30.7
28-12-2021	21.6	0	30.6
29-12-2021	14.7	5.1	18
30-12-2021	13	0.2	29.3
31-12-2021	11.9	2.4	17.4
01-01-2022	14.6	66.6	6.7
02-01-2022	16	12.9	23
03-01-2022	15	26.1	8.1
04-01-2022	16.4	0	23.1
05-01-2022	17.9	0	28.6
06-01-2022	18.3	0	30.3
07-01-2022	21.1	0	30.7
08-01-2022	19.4	0	29.7
09-01-2022	16.4	0	12.2
10-01-2022	18	0	27.3
11-01-2022	17.8	0	30.8
12-01-2022	16.5	0	29.9
13-01-2022	15.9	0	27.2
14-01-2022	17.9	0	20.3
15-01-2022	15.3	0	29
16-01-2022	11.7	0	24.8
17-01-2022	9.5	0	26.8
18-01-2022	12.6	2.5	27.7
19-01-2022	12.8	0.1	26.3
20-01-2022	12.2	0	27
21-01-2022	16	0.8	23.7
22-01-2022	14.8	29.3	18.1
23-01-2022	15.6	5.7	14
24-01-2022	17.5	0	21
25-01-2022	18.4	0	28
26-01-2022	20.5	0	29
27-01-2022	21.4	0	28.2
28-01-2022	17.8	0	20.4
29-01-2022	15.8	0	22.9
30-01-2022	15.2	0.7	23
31-01-2022	13.4	0	27.9
01-02-2022	15.2	0	27.3
02-02-2022	18.1	0	26.5
03-02-2022	17.2	0	25.2
04-02-2022	17.5	0	23.9
05-02-2022	18.4	0	25.9
06-02-2022	22	0	27.3
07-02-2022	18.6	0	27.5
08-02-2022	17.2	0	23.7
09-02-2022	16	0	18.8
10-02-2022	16.1	0	26.6
11-02-2022	16.3	0	26.8
12-02-2022	20.8	0	26.8
13-02-2022	18.2	0	25.8
14-02-2022	16.6	0	23.1
15-02-2022	15.4	0	24
16-02-2022	18.6	0	23.4
17-02-2022	15.7	0	26
