# Supplementary material for: Integrated Transcriptome Analysis Identified Key Expansin Genes Associated with Wheat Cell Wall, GrainWeight and Yield
Source: Preprints.org preprint supplement (doi:10.20944/preprints202307.0816.v1), 2023-07-12
Supplement: Supplementary file 8 [file Supplementary TableS5.xlsx]

## Sheet: Hoja1
Gene ID	Gene Name	Sequence	Sequence Length (bp)
TraesCS1B02G226100	TaEXPB2-B F	5’ – GCTGCTACGGTCAAGTGAGT – 3’	20
	TaEXPB2-B R	5’ – TAGAAAGACGCACCGACACC – 3’	20
TraesCS1A02G300200	TaEXPA1-A F	5’ – GCTACGCTGAGGCTGCTAAT – 3’	20
	TaEXPA1-A R	5’ – GAGTGCCAAGCTGCTACGTA – 3’	20
TraesCS4B02G327100	TaEXLA3-B F	5’ – GTTAGGGGCTCCTGCAAAGT – 3’	20
	TaEXLA3-B R	5’ – TTTTGTTCGAGCCTAGCCGT – 3’	20
TraesCS4D02G324000	TaEXLA2-D F	5’ – CAAGCCAAGAGGAGGAGCTA – 3’	20
	TaEXLA2-D R	5’ – GCTCATGCATGTTTGTCCAC – 3’	20
TraesCS1B02G225700	TaEXPB7-B F	5’ – CCTCTGCTGCCTACGGATTA – 3’	20
	TaEXPB7-B R	5’ – GCAAACTATGCCTCCTGCAT – 3’	20
TraesCS3B02G376800	TaEXPA3-B1 F	5’ – GTTAGTGTGGCCTTGCGTTG – 3’	20
	TaEXPA3-B1 R	5’ – GCAGGATTCGGCAACAACAG – 3’	20
